# Supplementary material
Source: publisher site journal article supplement (https://www.dovepress.com/get_supplementary_file.php?f=471606.xlsx)
Supplement: Supplementary file 1 [file get_supplementary_file.php]

## Sheet: Sheet 1
AU	CR	AB	C1	DE	DI	DT	ID	J9	JI	LA	PU	PY	RP	SN	SO	TC	TI	VL	DB	AU_UN	AU1_UN	AU_UN_NR	SR_FULL	SR
ABU-AMERO K;AL-MOHANNA F;AL-BOUDARI O;MOHAMED G;DZIMIRI N	none	BACKGROUND: THE ROLE OF GENE-ENVIRONMENT INTERACTIONS AS RISK FACTORS FOR CORONARY HEART DISEASE (CAD) REMAINS LARGELY UNDEFINED. SUCH INTERACTIONS MAY INVOLVE GENE MUTATIONS AND DISEASE CONDITIONS SUCH AS TYPE 2 DIABETES MELLITUS (DM2) PREDISPOSING INDIVIDUALS TO ACQUIRING THE DISEASE. METHODS: IN THE PRESENT STUDY, WE ASSESSED THE POSSIBLE INTERACTIVE EFFECT OF DM2 AND E-SELECTIN S128R POLYMORP…	GENETICS DEPARTMENT, KING FAISAL SPECIALIST HOSPITAL AND RESEARCH CENTRE, RIYADH 11211, SAUDI ARABIA; BIOLOGICAL AND MEDICAL RESEARCH DEPARTMENT, KING FAISAL SPECIALIST HOSPITAL AND RESEARCH CENTRE, RIYADH 11211, SAUDI ARABIA; BIOSTATISTICS, EPIDEMIOLOGY AND SCIENTIFIC COMPUTING DEPARTMENT, KING FAISAL SPECIALIST HOSPITAL AND RESEARCH CENTRE, RIYADH 11211, SAUDI ARABIA		10.1186/1471-2350-8-35	ARTICLE	AGED; CORONARY ARTERIOSCLEROSIS; DIABETES MELLITUS; TYPE 2; E-SELECTIN; FEMALE; GENETIC PREDISPOSITION TO DISEASE; HUMANS; LOGISTIC MODELS; MALE; MIDDLE AGED; POLYMORPHISM; RESTRICTION FRAGMENT LENGTH; RISK FACTORS; SAUDI ARABIA; ENDOTHELIAL LEUKOCYTE ADHESION MOLECULE 1; ENDOTHELIAL LEUKOCYTE ADHESION MOLECULE 1; ADULT; AGED; ALLELE; ARTICLE; CARDIOVASCULAR RISK; CONTROLLED STUDY; FEMALE; GENE A…	BMC MED GENET	BMC MED. GENET.	ENGLISH		2007	N. DZIMIRI; GENETICS DEPARTMENT, KING FAISAL SPECIALIST HOSPITAL AND RESEARCH CENTRE, RIYADH 11211, SAUDI ARABIA; EMAIL: DZIMIRI@KFSHRC.EDU.SA	14712350	BMC MEDICAL GENETICS	11	THE INTERACTIVE ROLE OF TYPE 2 DIABETES MELLITUS AND ESELECTIN S128R MUTATION ON SUSCEPTIBILITY TO CORONARY HEART DISEASE	8	ISI	KING FAISAL SPECIALIST HOSPITAL AND RESEARCH CENTRE;KING FAISAL SPECIALIST HOSPITAL AND RESEARCH CENTRE;EPIDEMIOLOGY AND SCIENTIFIC COMPUTING DEPARTMENT	NOTREPORTED;KING FAISAL SPECIALIST HOSPITAL AND RESEARCH CENTRE;NOTREPORTED		ABU-AMERO KK, 2007, BMC MED GENET	ABU-AMERO KK, 2007, BMC MED GENET
ADEYEMO A;JOHNSON T;ACHEAMPONG J;OLI J;OKAFOR G;AMOAH A;OWUSU S;AGYENIM-BOATENG K;EGHAN B;ABBIYESUKU F;FASANMADE O;RUFUS T;DOUMATEY A;CHEN G;ZHOU J;CHEN Y;FURBERT-HARRIS P;DUNSTON G;COLLINS F;ROTIMI C	ABECASIS GR, 2002, NAT GENET, V30, P97, DOI 10.1038/NG786;ALMASY L, 1998, AM J HUM GENET, V62, P1198, DOI 10.1086/301844;*AM DIAB ASS, 1999, DIABETES CARE, V22, PS20;AMOS CI, 1994, AM J HUM GENET, V54, P535;ARYA R, 2002, DIABETES, V51, P841, DOI 10.2337/DIABETES.51.3.841;AUSTIN MA, 1992, ANN MED, V24, P477, DOI 10.3109/07853899209166999;AUSTIN MA, 1990, CIRCULATION, V82, P495, DOI 10.1161/01.CIR.…	LIPID ABNORMALITIES ARE STRONGLY LINKED WITH CORONARY HEART DISEASE AND ARE COMMON IN TYPE 2 DIABETES. HOWEVER, LITTLE IS KNOWN ABOUT THE GENETIC DETERMINANTS OF SERUM LIPIDS IN AFRICAN POPULATIONS. AN AUTOSOMAL GENOME SCAN WAS PERFORMED FOR LINKAGE TO FIVE PLASMA LIPID PHENOTYPES (TOTAL CHOLESTEROL, TRIGLYCERIDES (TG), HDL-CHOLESTEROL (HDL-C), LDL-CHOLESTEROL (LDL-C) AND VLDL-CHOLESTEROL (VLDL-C…	HOWARD UNIV, COLL MED, NATL HUMAN GENOME CTR, WASHINGTON, DC 20059 USA.; UNIV IBADAN, COLL MED, IBADAN, NIGERIA.; UNIV LAGOS, COLL MED ENDOCRINE & METAB UNIT, LAGOS, NIGERIA.; UNIV SCI & TECHNOL, DEPT MED, KUMASI, GHANA.; UNIV NIGERIA, TEACHING HOSP, DEPT MED, ENUGU, NIGERIA.; UNIV GHANA, MED SCH, DEPT MED, ACCRA, GHANA.; NATL INST HLTH, NATL HUMAN GENOME RES INST, BETHESDA, MD USA.;	GENOME SCAN; LIPIDS; CHOLESTEROL; TYPE 2 DIABETES; AFRICA	10.1016/j.atherosclerosis.2004.12.049	ARTICLE	CORONARY-HEART-DISEASE; CARDIOVASCULAR-DISEASE; SUSCEPTIBILITY GENES; INSULIN-RESISTANCE; HDL CHOLESTEROL; RISK-FACTORS; LIPOPROTEIN; EPIDEMIOLOGY; PHENOTYPES; PROFILES	ATHEROSCLEROSIS	ATHEROSCLEROSIS	ENGLISH	ELSEVIER IRELAND LTD	2005	ROTIMI, C (CORRESPONDING AUTHOR), HOWARD UNIV, COLL MED, NATL HUMAN GENOME CTR, 2216 6TH ST, WASHINGTON, DC 20059 USA.	0021-9150	ATHEROSCLEROSIS	31	A GENOME WIDE QUANTITATIVE TRAIT LINKAGE ANALYSIS FOR SERUM LIPIDS IN TYPE 2 DIABETES IN AN AFRICAN POPULATION	181	ISI	HOWARD UNIVERSITY; UNIVERSITY OF IBADAN; UNIVERSITY OF LAGOS; KWAME NKRUMAH UNIVERSITY SCIENCE AND TECHNOLOGY; UNIVERSITY OF NIGERIA; UNIVERSITY OF GHANA; NATIONAL INSTITUTES OF HEALTH (NIH) - USA; NIH NATIONAL HUMAN GENOME RESEARCH INSTITUTE (NHGRI)	HOWARD UNIV		ADEYEMO AA, 2005, ATHEROSCLEROSIS	ADEYEMO AA, 2005, ATHEROSCLEROSIS
AFANAS'EV S;KONDRAT'EVA D;MUSLIMOVA E;BUDNIKOVA O;AKHMEDOV S;KOZLOV B	AFANASIEV S A, 2016, VESTN ROSS AKAD MED NAUK, P97, DOI 10.15690/VRAMN612;AFANASIEV SA, 2019, DIABETES MELLIT, V22, P25, DOI 10.14341/DM9735;БАРДЫМОВА ТАТЬЯНА ПРОКОПЬЕВНА BARDYMOVA T.P., 2017, ACTA BIOMEDICA SCIENTIFICA (EAST SIBERIAN BIOMEDICAL JOURNAL), ACTA BIOMEDICA SCIENTIFICA (EAST SIBERIAN BIOMEDICAL JOURNAL), ACTA BIOMEDICA SCIENTIFICA (EAST SIBERIAN BIOMEDICAL JOURNAL), V2, P100;ESTRADA-…	WE COMPARED THE EXPRESSION OF CA2+-ATPASE (SERCA2A), CALSEQUESTRIN (CASQ2), RYANODINE RECEPTORS (RYR2) PROTEINS AND THEIR GENES (ATP2A2, CASQ2, AND RYR2) IN CORONARY HEART DISEASE (CHD) PATIENTS WITH AND WITHOUT COMORBID TYPE 2 DIABETES MELLITUS. ALL STUDIES WERE PERFORMED ON THE RIGHT ATRIAL APPENDAGES RESECTED DURING CORONARY BYPASS SURGERIES. EXPRESSION OF SERCA2A AND RYR2 PROTEINS AND THEIR A…	TOMSK NATL RES MED CTR, CARDIOL RES INST, TOMSK, RUSSIA.;	CASQ2; RYR2 GENE EXPRESSION; CA2+-TRANSPORTER PROTEINS; CARDIOMYOCYTE SARCOPLASMIC RETICULUM; CORONARY HEART DISEASE ASSOCIATED WITH TYPE 2 DIABETES MELLITUS	10.1007/s10517-021-05346-6	ARTICLE	MYOCARDIUM; FAILURE	B EXP BIOL MED+	BULL. EXP. BIOL. MED.	ENGLISH	SPRINGER	2021	AFANAS'EV, SA (CORRESPONDING AUTHOR), TOMSK NATL RES MED CTR, CARDIOL RES INST, TOMSK, RUSSIA.	0007-4888	BULLETIN OF EXPERIMENTAL BIOLOGY AND MEDICINE	0	EXPRESSION OF GENES AND PROTEINS OF THE SARCOPLASMIC RETICULUM CASUP2SUPTRANSPORT SYSTEMS IN CARDIOMYOCYTES IN CONCOMITANT CORONARY HEART DISEASE AND TYPE 2 DIABETES MELLITUS	172	ISI	RUSSIAN ACADEMY OF SCIENCES; TOMSK NATIONAL RESEARCH MEDICAL CENTER; CARDIOLOGY RESEARCH INSTITUTE - TOMSK	CARDIOL RES INST		AFANAS'EV SA, 2021, B EXP BIOL MED+	AFANAS'EV SA, 2021, B EXP BIOL MED+
AHMAD O;MORRIS J;MUJAMMAMI M;FORGETTA V;LEONG A;LI R;TURGEON M;GREENWOOD C;THANASSOULIS G;MEIGS J;SLADEK R;RICHARDS J	none	IN OBSERVATIONAL STUDIES, TYPE-2 DIABETES (T2D) IS ASSOCIATED WITH AN INCREASED RISK OF CORONARY HEART DISEASE (CHD), YET INTERVENTIONAL TRIALS HAVE SHOWN NO CLEAR EFFECT OF GLUCOSE-LOWERING ON CHD. CONFOUNDING MAY HAVE THEREFORE INFLUENCED THESE OBSERVATIONAL ESTIMATES. HERE WE USE MENDELIAN RANDOMIZATION TO OBTAIN UNCONFOUNDED ESTIMATES OF THE INFLUENCE OF T2D AND FASTING GLUCOSE (FG) ON CHD RI…	CENTRE FOR CLINICAL EPIDEMIOLOGY, JEWISH GENERAL HOSPITAL, MCGILL UNIVERSITY, MONTREAL, H3A 0G4, QC, CANADA; DEPARTMENT OF MEDICINE, MCGILL UNIVERSITY, MONTREAL, H3A 0G4, QC, CANADA; DEPARTMENT OF HUMAN GENETICS, MCGILL UNIVERSITY, MONTRÉAL, H3A 0G4, QC, CANADA; MASSACHUSETTS GENERAL HOSPITAL, DEPARTMENT OF MEDICINE, HARVARD MEDICAL SCHOOL, BOSTON, 02115, MA, UNITED STATES; DEPARTMENT OF ONCOLOGY…		10.1038/ncomms8060	ARTICLE	ADULT; AGED; BLOOD GLUCOSE; CASE-CONTROL STUDIES; CAUSALITY; CORONARY DISEASE; DIABETES MELLITUS; TYPE 2; HEMOGLOBIN A; GLYCOSYLATED; HUMANS; MENDELIAN RANDOMIZATION ANALYSIS; MIDDLE AGED; ODDS RATIO; POLYMORPHISM; SINGLE NUCLEOTIDE; RISK FACTORS; GLUCOSE; HEMOGLOBIN A1C; LOW DENSITY LIPOPROTEIN CHOLESTEROL; TRIACYLGLYCEROL; GLUCOSE BLOOD LEVEL; GLYCOSYLATED HEMOGLOBIN; HEMOGLOBIN A1C PROTEIN; HU…	NAT COMMUN	NAT. COMMUN.	ENGLISH	NATURE PUBLISHING GROUP	2015		20411723	NATURE COMMUNICATIONS	96	A MENDELIAN RANDOMIZATION STUDY OF THE EFFECT OF TYPE2 DIABETES ON CORONARY HEART DISEASE	6	ISI	MCGILL UNIVERSITY;MCGILL UNIVERSITY;MCGILL UNIVERSITY;HARVARD MEDICAL SCHOOL;MCGILL UNIVERSITY;KING'S COLLEGE LONDON	MCGILL UNIVERSITY;MCGILL UNIVERSITY;MCGILL UNIVERSITY;HARVARD MEDICAL SCHOOL;MCGILL UNIVERSITY;KING'S COLLEGE LONDON		AHMAD OS, 2015, NAT COMMUN	AHMAD OS, 2015, NAT COMMUN
AHMADLOO S;LING K;FAZLI A;LARIJANI G;GHODSIAN N;MOHAMMADI S;AMINI N;SARMADI V;ISMAIL P	ABDULLAH N, 2014, INT J ENDOCRINOL, V2014, DOI 10.1155/2014/593982;AMIDU N., 2019, INT J CHRONIC DIS, DOI 10.1155/2019/2578171, DOI 10.1155/2019/2578171;ANG C S, 2016, MED J MALAYSIA, V71, P42;BANKS E, 2019, BMC MED, V17, DOI 10.1186/S12916-019-1351-4;BITTENCOURT C, 2014, DIABETOL METAB SYNDR, V6, DOI 10.1186/1758-5996-6-46;CEFALU WT, 2009, DIABETES, V58, P307, DOI 10.2337/DB08-1656;CERCATO C, 20…	BACKGROUND: CORONARY HEART DISEASE (CHD) IS THE LEADING CAUSE OF DEATH IN INDUSTRIALIZED COUNTRIES. THERE IS CURRENTLY NO DIRECT RELATION BETWEEN CHD AND TYPE 2 DIABETES MELLITUS (T2D), ONE OF THE MAJOR MODIFIABLE RISK FACTORS FOR CHD. THIS STUDY WAS CARRIED OUT FOR GENES EXPRESSION PROFILING OF T2D ASSOCIATED GENES TO IDENTIFY RELATED BIOLOGICAL PROCESSES/ES AND MODULATED SIGNALING PATHWAY/S OF …	UNIV PUTRA MALAYSIA, FAC MED & HLTH SCI, DEPT BIOMED SCI, SERDANG 43400, SELANGOR, MALAYSIA.; PASTEUR INST IRAN, VACCINAT DEPT, TEHRAN, IRAN.; UNIV PUTRA MALAYSIA, FAC MED & HLTH SCI, GENET & REGENERAT MED RES CTR, SERDANG 43400, SELANGOR, MALAYSIA.; UNIV PUTRA MALAYSIA, FAC MED & HLTH SCI, DEPT MED, SERDANG 43400, SELANGOR, MALAYSIA.; ISLAMIC AZAD UNIV, DEPT BIOL, SCI & RES BRANCH, TEHRAN, IRAN.…	CORONARY HEART DISEASE; TYPE 2 DIABETES MELLITUS; GENE EXPRESSION; SIGNALING PATHWAY	10.1186/s13098-022-00878-x	ARTICLE	ARTERY-DISEASE; RISK-FACTORS; CARDIOVASCULAR-DISEASE; INSULIN-RESISTANCE; ATHEROSCLEROSIS; OBESITY; PATHOPHYSIOLOGY; HYPERLIPIDEMIA; INFLAMMATION; HEALTH	DIABETOL METAB SYNDR	DIABETOL. METAB. SYNDR.	ENGLISH	BMC	2022	ISMAIL, P (CORRESPONDING AUTHOR), UNIV PUTRA MALAYSIA, FAC MED & HLTH SCI, DEPT BIOMED SCI, SERDANG 43400, SELANGOR, MALAYSIA.; SARMADI, VH (CORRESPONDING AUTHOR), IRAN UNIV MED SCI, CELLULAR & MOL RES CTR, TEHRAN, IRAN.; SARMADI, VH (CORRESPONDING AUTHOR), IRAN UNIV MED SCI, FAC ADV TECHNOL MED, INST REGENERAT MED, TEHRAN, IRAN.		DIABETOLOGY & METABOLIC SYNDROME	0	SIGNATURE PATTERN OF GENE EXPRESSION AND SIGNALING PATHWAY IN PREMATURE DIABETIC PATIENTS UNCOVER THEIR CORRELATION TO EARLY AGE CORONARY HEART DISEASE	14	ISI	UNIVERSITI PUTRA MALAYSIA; LE RESEAU INTERNATIONAL DES INSTITUTS PASTEUR (RIIP); PASTEUR INSTITUTE OF IRAN; UNIVERSITI PUTRA MALAYSIA; UNIVERSITI PUTRA MALAYSIA; ISLAMIC AZAD UNIVERSITY; UNIVERSITY OF BRITISH COLUMBIA; SHAHID BEHESHTI UNIVERSITY; IRAN UNIVERSITY OF MEDICAL SCIENCES; IRAN UNIVERSITY OF MEDICAL SCIENCES	UNIV PUTRA MALAYSIA;IRAN UNIV MED SCI;IRAN UNIV MED SCI		AHMADLOO S, 2022, DIABETOL METAB SYNDR	AHMADLOO S, 2022, DIABETOL METAB SYNDR
AITMAN T;GOTODA T;EVANS A;IMRIE H;HEATH K;TREMBLING P;TRUMAN H;WALLACE C;RAHMAN A;DORE C;FLINT J;KREN V;ZIDEK V;KURTZ T;PRAVENEC M;SCOTT J	AITMAN TJ, 1997, ARTERIOSCL THROM VAS, V17, P748, DOI 10.1161/01.ATV.17.4.748;ANONYMOUS, 1979, BIOMETRICS;BECKERS MC, 1994, GENOMICS, V23, P685, DOI 10.1006/GENO.1994.1557;BELKNAP JK, 1996, BEHAV GENET, V26, P149, DOI 10.1007/BF02359892;BOTTGER A, 1996, J CLIN INVEST, V98, P856, DOI 10.1172/JCI118858;CABEZAS MC, 1993, J CLIN INVEST, V92, P160, DOI 10.1172/JCI116544;COHEN B, 1996, SCIENCE, V274, P…	CORONARY HEART DISEASE, HYPERTENSION, NON-INSULIN-DEPENDENT DIABETES AND OBESITY ARE MAJOR CAUSES OF ILL HEALTH IN INDUSTRIAL SOCIETIES, DISTURBANCES OF CARBOHYDRATE AND LIPID METABOLISM ARE A COMMON FEATURE OF THESE DISORDERS(1-9). THE BASES FOR THESE DISTURBANCES AND THEIR ROLES IN DISEASE PATHOGENESIS ARE POORLY UNDERSTOOD, THE SPONTANEOUSLY HYPERTENSIVE RAT (SHR), A WIDELY USED ANIMAL MODEL O…	HAMMERSMITH HOSP,ROYAL POSTGRAD MED SCH,DEPT MED,LONDON W12 0NN,ENGLAND.; HAMMERSMITH HOSP,ROYAL POSTGRAD MED SCH,DEPT MED STAT & EVALUAT,LONDON W12 0NN,ENGLAND.; INST MOL MED,OXFORD OX3 9DU,ENGLAND.; CHARLES UNIV,FAC MED 1,DEPT BIOL,PRAGUE 12800 2,CZECH REPUBLIC.; ACAD SCI CZECH REPUBL,INST PHYSIOL,CR-14220 PRAGUE 4,CZECH REPUBLIC.; UNIV CALIF SAN FRANCISCO,DEPT LAB MED,SAN FRANCISCO,CA 94143.;		10.1038/ng0697-197	ARTICLE	FAMILIAL COMBINED HYPERLIPIDEMIA; RECOMBINANT INBRED STRAINS; NITRIC-OXIDE SYNTHASE; UPPER-BODY OBESITY; INSULIN-RESISTANCE; BLOOD-PRESSURE; GENETIC-MAP; LINKAGE MAP; APOLIPOPROTEIN; CHROMOSOME-4	NAT GENET	NATURE GENET.	ENGLISH	NATURE PUBLISHING CO	1997	AITMAN, TJ (CORRESPONDING AUTHOR), HAMMERSMITH HOSP,MRC,CTR CLIN SCI,MOL MED GRP,LONDON W12 0NN,ENGLAND.	1061-4036	NATURE GENETICS	132	QUANTITATIVE TRAIT LOCI FOR CELLULAR DEFECTS IN GLUCOSE AND FATTY ACID METABOLISM IN HYPERTENSIVE RATS	16	ISI	IMPERIAL COLLEGE LONDON; IMPERIAL COLLEGE LONDON; UNIVERSITY OF OXFORD; CHARLES UNIVERSITY PRAGUE; CZECH ACADEMY OF SCIENCES; INSTITUTE OF PHYSIOLOGY OF THE CZECH ACADEMY OF SCIENCES; UNIVERSITY OF CALIFORNIA SYSTEM; UNIVERSITY OF CALIFORNIA SAN FRANCISCO	CTR CLIN SCI		AITMAN TJ, 1997, NAT GENET	AITMAN TJ, 1997, NAT GENET
ALI R;NIMA R	none	SCLEROSTIN, ENCODED BY THE SOST GENE, IT HAS ALSO BEEN SHOWN THAT SCLEROSTIN IS EXPRESSED IN AORTIC VSMC (VASCULAR SMOOTH MUSCLE) AND UPREGULATION OF SOST GENE HAS INHIBITORY EFFECTS ON THE AORTIC ANEURYSM AND ATHEROSCLEROSIS DEVELOPMENT. AIMS: THE CURRENT STUDY AIMS TO EXPLORE POTENTIAL THE ASSOCIATION BETWEEN SOST GENE SINGLE NUCLEOTIDE POLYMORPHISMS (RS865429 C/T) AND CORONARY ARTERY DISEASES …	DEPARTMENT DEPT. OF CHEMISTRY, FACULTY OF SCIENCE, KUFA UNIVERSITY, P. O. BOX 21, IRAQ; DEPT. OF PATHOLOGICAL ANALYSIS, FACULTY OF SCIENCE, KUFA UNIVERSITY, P. O. BOX 21, IRAQ	CORONARY ARTERY DISEASES; POLYMERASE CHAIN REACTION RESTRICTION FRAGMENT LENGTH POLYMORPHISM; SINGLE NUCLEOTIDE POLYMORPHISM; TYPE 2DIABETESE MELLITUS	10.37506/ijfmt.v15i1.13617	ARTICLE	BIOLOGICAL MARKER; GENOMIC DNA; HEMOGLOBIN A1C; SCLEROSTIN; ADULT; ARTICLE; DOMINANT GENE; ENZYME LINKED IMMUNOSORBENT ASSAY; FEMALE; GENE AMPLIFICATION; GENE FREQUENCY; GENE MUTATION; GENE SEQUENCE; GENETIC ASSOCIATION; GENETIC PREDISPOSITION; GENOTYPE; GLUCOSE BLOOD LEVEL; HOMEOSTASIS MODEL ASSESSMENT; HUMAN; INSULIN BLOOD LEVEL; IRAQI; ISCHEMIC HEART DISEASE; MAJOR CLINICAL STUDY; MALE; MIDDLE…	INDIAN J FORENSIC MED TOXICOL	INDIAN J. FORENSIC MED. TOXICOL.	ENGLISH	INSTITUTE OF MEDICO-LEGAL PUBLICATIONS	2021	R.S. NIMA; DEPT. OF PATHOLOGICAL ANALYSIS, FACULTY OF SCIENCE, KUFA UNIVERSITY, P. O. BOX 21, IRAQ; EMAIL: RASHA.ALARIDHI@UOKUFA.EDU.IQ	09739122	INDIAN JOURNAL OF FORENSIC MEDICINE AND TOXICOLOGY	1	ASSOCIATION OF RS865429 CT POLYMORPHISM IN SOST GENE WITH CORONARY HEART DISEASE IN IRAQI TYPE 2 DIABETES MELLITUS PATIENTS	15	ISI	KUFA UNIVERSITY;KUFA UNIVERSITY	NOTREPORTED;KUFA UNIVERSITY;NOTREPORTED		ALI RAM, 2021, INDIAN J FORENSIC MED TOXICOL	ALI RAM, 2021, INDIAN J FORENSIC MED TOXICOL
ALRASHEED M	AARABI G, 2017, J DENT RES, V96, P610, DOI 10.1177/0022034517699786;AKINYEMI R, 2017, J NEUROL SCI, V379, P229, DOI 10.1016/J.JNS.2017.05.046;ALBERTI KGMM, 1998, DIABETIC MED, V15, P539, DOI 10.1002/(SICI)1096-9136(199807)15:7<539::AID-DIA668>3.0.CO;2-S;ALMONTASHIRI NAM, 2015, CIRCULATION, V132, P1969, DOI 10.1161/CIRCULATIONAHA.114.015023;BAO XY, 2012, MOL BIOL REP, V39, P1609, DOI 10.1007/S1103…	BACKGROUND: CORONARY HEART DISEASE (CAD) IS A MULTIPLE WITH SEVERAL CONTRIBUTORY RISK TRAITS, INCLUDING TYPE 2 DIABETES AND HYPERTENSION, WHICH MAY SHARE COMMON GENETIC RISK VARIANTS WITH THE DISEASE. GENOME-WIDE ASSOCIATION STUDIES (GWASS) HAVE YIELDED A WEALTH OF INFORMATION SUGGESTING THAT CAD, THE EXTENT OF CONTRIBUTORY VARIANTS MAY DIFFER ACCORDING TO GENETIC LOCUS. THE PRESENT STUDY AIMED A…	KING SAUD UNIV, COLL PHARM, DEPT CLIN PHARM, POB 2457, RIYADH 11451, SAUDI ARABIA.;	CDKN2B GENE; SAUDI ARAB POPULATION; ASSOCIATION STUDY; TYPE 2 DIABETES MELLITUS; HYPERTENSION	10.1016/j.jsps.2018.07.009	ARTICLE	CORONARY-ARTERY-DISEASE; GENOME-WIDE ASSOCIATION; CHROMOSOME 9P21; MYOCARDIAL-INFARCTION; SUSCEPTIBILITY LOCI; ISCHEMIC-STROKE; 4 SNPS; RISK; VARIANTS; POLYMORPHISMS	SAUDI PHARM J	SAUDI PHARM. J.	ENGLISH	ELSEVIER SCIENCE BV	2018	ALRASHEED, MM (CORRESPONDING AUTHOR), KING SAUD UNIV, COLL PHARM, DEPT CLIN PHARM, POB 2457, RIYADH 11451, SAUDI ARABIA.	1319-0164	SAUDI PHARMACEUTICAL JOURNAL	1	EVALUATION OF THE ROLE OF ICDKN2BI GENE IN TYPE 2 DIABETES MELLITUS AND HYPERTENSION IN ETHNIC SAUDI ARABS	26	ISI	KING SAUD UNIVERSITY	KING SAUD UNIV		ALRASHEED MM, 2018, SAUDI PHARM J	ALRASHEED MM, 2018, SAUDI PHARM J
AL-SHARSHANI D;VELAYUTHAM D;SAMARA M;GAZAL R;ZEN A;ISMAIL M;AHMED M;NASRALLAH G;YOUNES S;RIZK N;HAMMUDA S;QORONFLEH M;FARRELL T;ZAYED H;ABDULROUF P;ALDWEIK M;SILANG J;RAHHAL A;AL-JURF R;MAHFOUZ A;SALAM A;AL R H;AL-DEWIK N	ABDULLAH MMH, 2021, NUTRIENTS, V13, DOI 10.3390/NU13020695;ABE S, 2015, MOL MED REP, V12, P5429, DOI 10.3892/MMR.2015.4081;AL RASADI K, 2016, ATHEROSCLEROSIS, V252, P182, DOI 10.1016/J.ATHEROSCLEROSIS.2016.07.925;AL-DEWIK N. I., 2019, ADVANCES IN PUBLIC HEALTH, V2019, DOI 10.1155/2019/3807032;AL-DEWIK NI, 2022, PROCESSES, V10, DOI 10.3390/PR10061107;ALATHARI BE, 2020, J DIABETES METAB DIS, V19, P…	BACKGROUNDDYSLIPIDEMIA IS RECOGNIZED AS ONE OF THE RISK FACTORS OF CARDIOVASCULAR DISEASES (CVDS), TYPE 2 DIABETES MELLITUS (T2DM), AND NON-ALCOHOLIC FATTY LIVER DISEASE (NAFLD). OBJECTIVETHE STUDY AIMED TO INVESTIGATE THE ASSOCIATION BETWEEN SELECTED SINGLE NUCLEOTIDE POLYMORPHISMS (SNPS) WITH DYSLIPIDEMIA AND INCREASED SUSCEPTIBILITY RISKS OF CVD, NAFLD, AND/OR T2DM IN DYSLIPIDEMIA PATIENTS IN …	HAMAD MED CORP HMC, HEART HOSP HH, DOHA, QATAR.; HAMAD BIN KHALIFA UNIV HBKU, COLL HLTH & LIFE SCI CHLS, GENOM & PRECIS MED GPM, DOHA, QATAR.; HAMAD BIN KHALIFA UNIV HBKU, LIBERAL ARTS & SCI LAS, DOHA, QATAR.; KINGSTON UNIV LONDON, DEPT PSYCHOL, LONDON, ENGLAND.; HAMAD MED CORP HMC, WOMENS WELLNESS & RES CTR WWRC, DEPT RES, DOHA, QATAR.; HAMAD BIN KHALIFA UNIV HBKU, COLL HLTH & LIFE SCI CHLS, DOH…	CARDIOVASCULAR DISEASE (CVD); CORONARY ARTERY DISEASE (CAD); DIABETES; DYSLIPIDEMIA; HYPERTENSION; METABOLIC; NON-ALCOHOLIC FATTY LIVER DISEASE (NAFLD); QATAR GENOME PROJECT (QGP); SINGLE NUCLEOTIDE POLYMORPHISM (SNP)	10.1002/mgg3.2178	ARTICLE; EARLY ACCESS	CORONARY-HEART-DISEASE; GENOME-WIDE ASSOCIATION; HHEX GENE; CARDIOVASCULAR-DISEASE; LIPID-METABOLISM; ARTERY-DISEASE; PREVALENCE; CHOLESTEROL; TRIBBLES-1; FURIN	MOL GENET GENOM MED	MOL. GENET. GENOM. MED.	ENGLISH	WILEY	2023	AL-DEWIK, NI (CORRESPONDING AUTHOR), HAMAD MED CORP HMC, WOMENS WELLNESS & RES CTR WWRC, DOHA 3050, QATAR.	2324-9269	MOLECULAR GENETICS & GENOMIC MEDICINE	0	ASSOCIATION OF SINGLE NUCLEOTIDE POLYMORPHISMS WITH DYSLIPIDEMIA AND RISK OF METABOLIC DISORDERS IN THE STATE OF QATAR		ISI	HAMAD MEDICAL CORPORATION; QATAR FOUNDATION (QF); HAMAD BIN KHALIFA UNIVERSITY-QATAR; QATAR FOUNDATION (QF); HAMAD BIN KHALIFA UNIVERSITY-QATAR; KINGSTON UNIVERSITY; HAMAD MEDICAL CORPORATION; QATAR FOUNDATION (QF); HAMAD BIN KHALIFA UNIVERSITY-QATAR; HAMAD MEDICAL CORPORATION; QATAR UNIVERSITY; QATAR UNIVERSITY; HAMAD MEDICAL CORPORATION; HAMAD MEDICAL CORPORATION; KINGSTON UNIVERSITY; ST GEORGE…	WOMENS WELLNESS AND RES CTR WWRC		AL-SHARSHANI D, 2023, MOL GENET GENOM MED	AL-SHARSHANI D, 2023, MOL GENET GENOM MED
ANGELAKOPOULOU A;SHAH T;SOFAT R;SHAH S;BERRY D;COOPER J;PALMEN J;TZOULAKI I;WONG A;JEFFERIS B;MANIATIS N;DRENOS F;GIGANTE B;HARDY R;LAXTON R;LEANDER K;MOTTERLE A;SIMPSON I;SMEETH L;THOMSON A;VERZILLI C;KUH D;IRELAND H;DEANFIELD J;CAULFIELD M;WALLACE C;SAMANI N;MUNROE P;LATHROP M;FOWKES F;MARMOT M;WHINCUP P;WHITTAKER J;DE F U;KIVIMAKI M;KUMARI M;HYPPONEN E;POWER C;HUMPHRIES S;TALMUD P;PRICE J;MORR…	none	AIMSTO EVALUATE THE ASSOCIATIONS OF EMERGENT GENOME-WIDE-ASSOCIATION STUDY-DERIVED CORONARY HEART DISEASE (CHD)-ASSOCIATED SINGLE NUCLEOTIDE POLYMORPHISMS (SNPS) WITH ESTABLISHED AND EMERGING RISK FACTORS, AND THE ASSOCIATION OF GENOME-WIDE-ASSOCIATION STUDY-DERIVED LIPID-ASSOCIATED SNPS WITH OTHER RISK FACTORS AND CHD EVENTS.METHODS AND RESULTSUSING TWO CASECONTROL STUDIES, THREE CROSS-SECTIONAL…	FACULTY OF EPIDEMIOLOGY AND POPULATION HEALTH, LONDON SCHOOL OF HYGIENE AND TROPICAL MEDICINE, LONDON WC1E 7HT, KEPPEL STREET, UNITED KINGDOM; DIVISION OF MEDICINE, CENTRE FOR CLINICAL PHARMACOLOGY, UNIVERSITY COLLEGE LONDON, LONDON WC1E 6JF, 5 UNIVERSITY STREET, UNITED KINGDOM; DEPARTMENT OF GENETICS, EVOLUTION AND ENVIRONMENT, UCL GENETICS INSTITUTE, UNIVERSITY COLLEGE LONDON, LONDON WC1E 6BT, …	CORONARY DISEASE; GENES; LIPIDS; RISK FACTORS	10.1093/eurheartj/ehr225	ARTICLE	ADULT; AGED; BIOLOGICAL MARKERS; BODY MASS INDEX; CASE-CONTROL STUDIES; CORONARY DISEASE; DIABETES MELLITUS; TYPE 2; DIABETIC CARDIOMYOPATHIES; FEMALE; GENOME-WIDE ASSOCIATION STUDY; HUMANS; LIPIDS; MALE; MIDDLE AGED; POLYMORPHISM; SINGLE NUCLEOTIDE; PROSPECTIVE STUDIES; RISK FACTORS; APOLIPOPROTEIN A1; APOLIPOPROTEIN B; BIOLOGICAL MARKER; CHOLESTEROL; HIGH DENSITY LIPOPROTEIN CHOLESTEROL; LIPID;…	EUR HEART J	EUR. HEART J.	ENGLISH		2012	T. SHAH; DIVISION OF MEDICINE, CENTRE FOR CLINICAL PHARMACOLOGY, UNIVERSITY COLLEGE LONDON, LONDON WC1E 6JF, 5 UNIVERSITY STREET, UNITED KINGDOM; EMAIL: T.SHAH@UCL.AC.UK	15229645	EUROPEAN HEART JOURNAL	89	COMPARATIVE ANALYSIS OF GENOMEWIDE ASSOCIATION STUDIES SIGNALS FOR LIPIDS DIABETES AND CORONARY HEART DISEASE CARDIOVASCULAR BIOMARKER GENETICS COLLABORATION	33	ISI	LONDON SCHOOL OF HYGIENE AND TROPICAL MEDICINE;UNIVERSITY COLLEGE LONDON;UNIVERSITY COLLEGE LONDON;UNIVERSITY COLLEGE LONDON;UNIVERSITY COLLEGE LONDON;IMPERIAL COLLEGE LONDON;UNIVERSITY OF IOANNINA SCHOOL OF MEDICINE;MRC UNIT FOR LIFELONG HEALTH AND AGEING;UNIVERSITY COLLEGE LONDON MEDICAL SCHOOL;UNIVERSITY COLLEGE LONDON;INSTITUTE OF ENVIRONMENTAL MEDICINE;QUEEN MARY UNIVERSITY OF LONDON;SOUTHAM…	NOTREPORTED;UNIVERSITY COLLEGE LONDON;NOTREPORTED		ANGELAKOPOULOU A, 2012, EUR HEART J	ANGELAKOPOULOU A, 2012, EUR HEART J
ANTÚNEZ-ORTIZ D;TELLO-FLORES V;CRUZ M;DEL C A L;MORENO-GODÍNEZ M;VALLADARES-SALGADO A;CAHUA-PABLO J;DEL M O;FLORES-ALFARO E	none	BACKGROUND AND AIM. ADIPONECTIN EXERTS A PROTECTIVE EFFECT DUE TO ITS ANTI-INFLAMMATORY AND ANTI-ATHEROGENIC EFFECTS. VARIATION IN THE ADIPOQ AND ADIPOR2 GENES HAVE BEEN ASSOCIATED WITH INCREASED RISK OF METABOLIC SYNDROME (METS), TYPE-2 DIABETES, OR CORONARY HEART DISEASE (CHD). THE PURPOSE OF THIS STUDY WAS TO ANALYZE THE RELATIONSHIP BETWEEN ADIPONECTIN LEVELS AND SIX POLYMORPHISMS IN ADIPOQ A…	LABORATORIO DE EPIDEMIOLOGÍA CLÍNICA Y MOLECULAR, CIENCIAS QUÍMICO BIOLÓGICAS, UNIVERSIDAD AUTÓNOMA DE GUERRERO, 39089. CHILPANCINGO, GRO, MEXICO; UNIDAD DE INVESTIGACIÓN MÉDICA EN BIOQUÍMICA, HOSPITAL DE ESPECIALIDADES CENTRO MÉDICO SIGLO XXI, INSTITUTO MEXICANO DEL SEGURO SOCIAL, 06725 MÉXICO, DF, MEXICO	ADIPONECTIN; ADIPOQ GENE; ADIPOR2 GENE; ATHEROGENIC INDEX OF PLASMA; METABOLIC SYNDROME		ARTICLE		EXP CLIN CARDIOL	EXP. CLIN. CARDIOL.	ENGLISH	CARDIOLOGY ACADEMIC PRESS	2014	E. FLORES-ALFARO; LABORATORIO DE EPIDEMIOLOGÍA CLÍNICA Y MOLECULAR, CIENCIAS QUÍMICO BIOLÓGICAS, UNIVERSIDAD AUTÓNOMA DE GUERRERO, 39089. CHILPANCINGO, GRO, MEXICO; EMAIL: EFLORESA_2@HOTMAIL.COM	12056626	EXPERIMENTAL AND CLINICAL CARDIOLOGY	0	ASSOCIATION OF ADIPONECTIN LEVELS AND POLYMORPHISMS IN ADIPOQ AND ADIPOR2 GENES WITH METABOLIC SYNDROME AND ATHEROGENIC INDEX OF PLASMA	20	ISI	UNIVERSIDAD AUTÓNOMA DE GUERRERO;INSTITUTO MEXICANO DEL SEGURO SOCIAL	E. FLORES-ALFARO;UNIVERSIDAD AUTÓNOMA DE GUERRERO;NOTDECLARED		ANTÚNEZ-ORTIZ DL, 2014, EXP CLIN CARDIOL	ANTÚNEZ-ORTIZ DL, 2014, EXP CLIN CARDIOL
ARAZ M;AYNACIOGLU S;OKAN V;AKDEMIR I;AKTARAN S	none	OBJECTIVE - IT HAS BEEN SUGGESTED THAT THE INSERTION (I)/DELETION (D) POLYMORPHISM OF THE ANGIOTENSIN-CONVERTING ENZYME (ACE) MAY BE ASSOCIATED WITH ATHEROSCLEROSIS. THE AIM OF THE STUDY WAS TO EXAMINE THE ASSOCIATION BETWEEN ACE GENE POLYMORPHISM AND CORONARY HEART DISEASE IN TURKISH TYPE 2 DIABETIC PATIENTS. METHODS AND RESULTS - A TOTAL OF 152 (97 FEMALE, 55 MALE) TYPE 2 DIABETIC PATIENTS WERE…	DEPARTMENT OF INTERNAL MEDICINE, MEDICAL FACULTY, GAZIANTEP UNIVERSITY, TR-27070 GAZIANTEP, TURKEY	ANGIOTENSIN-CONVERTING ENZYME; CORONARY HEART DISEASE; POLYMORPHISM; TYPE 2 DIABETES MELLITUS	10.2143/AC.57.4.2005424	ARTICLE	CORONARY DISEASE; DIABETES MELLITUS; TYPE 2; DIABETIC ANGIOPATHIES; FEMALE; HUMANS; MALE; MIDDLE AGED; PEPTIDYL-DIPEPTIDASE A; POLYMERASE CHAIN REACTION; POLYMORPHISM; GENETIC; TURKEY; DIPEPTIDYL CARBOXYPEPTIDASE; DIPYRIDAMOLE; GENOMIC DNA; METHOXY ISOBUTYL ISONITRILE TECHNETIUM TC 99M; ADULT; ARTICLE; CARDIOVASCULAR DISEASE; DIABETES MELLITUS; EXERCISE TEST; FEMALE; GENETIC POLYMORPHISM; GENOTYP…	ACTA CARDIOL	ACTA CARDIOL.	ENGLISH	ACTA CARDIOLOGICA	2002	M. ARAZ; DEPARTMENT OF INTERNAL MEDICINE, MEDICAL FACULTY, GAZIANTEP UNIVERSITY, TR-27070 GAZIANTEP, TURKEY; EMAIL: ARAZ@GANTEP.EDU.TR	00015385	ACTA CARDIOLOGICA	8	ANGIOTENSINCONVERTING ENZYME GENE POLYMORPHISM AND CORONARY HEART DISEASE IN TURKISH TYPE 2 DIABETIC PATIENTS	57	ISI	GAZIANTEP UNIVERSITY	NOTREPORTED;GAZIANTEP UNIVERSITY;NOTREPORTED		ARAZ M, 2002, ACTA CARDIOL	ARAZ M, 2002, ACTA CARDIOL
ARYA R;DUGGIRALA R;ALMASY L;RAINWATER D;MAHANEY M;COLE S;DYER T;WILLIAMS K;LEACH R;HIXSON J;MACCLUER J;O'CONNELL P;STERN M;BLANGERO J	none	HIGH-DENSITY LIPOPROTEINS (HDLS) ARE ANTI-ATHEROGENIC LIPOPROTEINS THAT HAVE A MAJOR ROLE IN TRANSPORTING CHOLESTEROL FROM PERIPHERAL TISSUES TO THE LIVER, WHERE IT IS REMOVED. EPIDEMIOLOGIC STUDIES HAVE SHOWN THAT LOW LEVELS OF HIGH-DENSITY LIPOPROTEIN-CHOLESTEROL (HDL-C) ARE ASSOCIATED WITH AN INCREASED INCIDENCE OF CORONARY HEART DISEASE AND AN INCREASED MORTALITY RATE, INDICATING A PROTECTIVE…	DIVISION OF CLINICAL EPIDEMIOLOGY, DEPARTMENT OF MEDICINE, SAN ANTONIO, TX, UNITED STATES; DEPARTMENT OF GENETICS, SOUTHWEST FOUNDATION FOR BIOMEDICAL RESEARCH, SAN ANTONIO, TX, UNITED STATES; DEPARTMENT OF CELLULAR AND STRUCTURAL BIOLOGY, UNIVERSITY OF TEXAS HEALTH SCIENCE CENTER, SAN ANTONIO, TX, UNITED STATES; HUMAN GENETICS CENTER, UT HOUSTON HEALTH SCIENCE CENTER, HOUSTON, TX, UNITED STATES;…		10.1038/ng810	ARTICLE	ADULT; AGED; CARDIOVASCULAR DISEASES; CASE-CONTROL STUDIES; CHOLESTEROL; HDL; CHROMOSOME MAPPING; CHROMOSOMES; HUMAN; PAIR 9; COMORBIDITY; DIABETES MELLITUS; TYPE 2; FEMALE; GENE FREQUENCY; GENETIC MARKERS; GENETIC PREDISPOSITION TO DISEASE; GENOTYPE; HUMANS; HYPERLIPOPROTEINEMIA TYPE II; LOD SCORE; MALE; MEXICAN AMERICANS; MIDDLE AGED; PHENOTYPE; QUANTITATIVE TRAIT; HERITABLE; RISK FACTORS; TEXA…	NAT GENET	NAT. GENET.	ENGLISH		2002		10614036	NATURE GENETICS	86	LINKAGE OF HIGHDENSITY LIPOPROTEINCHOLESTEROL CONCENTRATIONS TO A LOCUS ON CHROMOSOME 9P IN MEXICAN AMERICANS	30	ISI	DIVISION OF CLINICAL EPIDEMIOLOGY;SOUTHWEST FOUNDATION FOR BIOMEDICAL RESEARCH;UNIVERSITY OF TEXAS HEALTH SCIENCE CENTER;UT HOUSTON HEALTH SCIENCE CENTER;BAYLOR COLLEGE OF MEDICINE	DIVISION OF CLINICAL EPIDEMIOLOGY;SOUTHWEST FOUNDATION FOR BIOMEDICAL RESEARCH;UNIVERSITY OF TEXAS HEALTH SCIENCE CENTER;UT HOUSTON HEALTH SCIENCE CENTER;BAYLOR COLLEGE OF MEDICINE		ARYA R, 2002, NAT GENET	ARYA R, 2002, NAT GENET
AUSTIN M;EDWARDS K;MCNEELY M;CHANDLER W;LEONETTI D;TALMUD P;HUMPHRIES S;FUJIMOTO W	none	A RAPIDLY GROWING BODY OF EVIDENCE DEMONSTRATES IMPORTANT ASSOCIATIONS BETWEEN THE METABOLIC SYNDROME, CHARACTERIZED BY A CLUSTER OF RISK FACTORS OR PHENOTYPES THAT INCLUDE DYSLIPIDEMIA, CENTRAL OBESITY, HYPERTENSION, AND HYPERINSULINEMIA, AND BOTH CARDIOVASCULAR DISEASE AND TYPE 2 DIABETES. THE PURPOSE OF THE PRESENT STUDY WAS TO CHARACTERIZE THE METABOLIC SYNDROME IN A SAMPLE OF 432 INDIVIDUALS…	DEPARTMENT OF EPIDEMIOLOGY, INSTITUTE FOR PUBLIC HEALTH GENETICS, UNIVERSITY OF WASHINGTON, SEATTLE, WA, UNITED STATES; DEPARTMENT OF MEDICINE, SCHOOL OF MEDICINE, UNIVERSITY OF WASHINGTON, SEATTLE, WA, UNITED STATES; LABORATORY MEDICINE, HARBORVIEW MED. CENTER UNIV. OF WA, SEATTLE, WA, UNITED STATES; DEPARTMENT OF ANTHROPOLOGY, UNIVERSITY OF WASHINGTON, SEATTLE, WA, UNITED STATES; CENTRE FOR CAR…		10.2337/diabetes.53.4.1166	ARTICLE	ASIAN CONTINENTAL ANCESTRY GROUP; CORONARY DISEASE; DIABETES MELLITUS; TYPE 2; FACTOR ANALYSIS; STATISTICAL; HUMANS; JAPAN; METABOLIC SYNDROME X; MULTIVARIATE ANALYSIS; RISK FACTORS; UNITED STATES; C REACTIVE PROTEIN; LOW DENSITY LIPOPROTEIN; ADULT; AGED; ARTICLE; ASIAN AMERICAN; CARDIOVASCULAR DISEASE; CLUSTER ANALYSIS; CONTROLLED STUDY; DIABETES MELLITUS; DYSLIPIDEMIA; ETHNIC GROUP; FACTORIAL A…	DIABETES	DIABETES	ENGLISH		2004	M.A. AUSTIN; DEPARTMENT OF EPIDEMIOLOGY, BOX 357236, UNIVERSITY OF WASHINGTON, SEATTLE, WA 98195-7236, 1959 N.E. PACIFIC AVE, UNITED STATES; EMAIL: MAUSTIN@U.WASHINGTON.EDU	00121797	DIABETES	62	HERITABILITY OF MULTIVARIATE FACTORS OF THE METABOLIC SYNDROME IN NONDIABETIC JAPANESE AMERICANS	53	ISI	UNIVERSITY OF WASHINGTON;UNIVERSITY OF WASHINGTON;HARBORVIEW MED. CENTER UNIV. OF WA;UNIVERSITY OF WASHINGTON;ROY. FREE AND UNIV. COLLEGE LONDON;UNIVERSITY OF WASHINGTON;SEATTLE	NOTREPORTED;UNIVERSITY OF WASHINGTON;NOTREPORTED		AUSTIN MA, 2004, DIABETES	AUSTIN MA, 2004, DIABETES
AYVAZ O;YAVASOGLU I;KADIKOYLU G;MEYDAN N;BARUTCA S;BOLAMAN Z	none	3P DELETION WHICH IS FREQUENTLY ASSOCIATED WITH SOLITARY TUMORS AND HEMATOLOGICAL MALIGNANCIES IS A CHROMOSOMAL ABNORMALITY. RECENTLY, JANUS KINASE-2 (JAK2) V617F MUTATION HAS AN IMPORTANT ROLE IN THE DIAGNOSIS OF MYELOPROLIFERATIVE DISORDERS, ESPECIALLY IN POLYCYTHEMIA VERA (PV). WE REPORTED THE DEVELOPMENT OF GASTRIC CANCER IN A 75-YEAR-OLD PATIENT WITH PV, 3P 12-14 DELETION AND JAK2 V617F MUTA…	DIVISION OF HEMATOLOGY, ADNAN MENDERES UNIVERSITY MEDICAL FACULTY, AYDIN 09100, TURKEY; DIVISION OF ONCOLOGY, ADNAN MENDERES UNIVERSITY MEDICAL FACULTY, AYDIN, TURKEY	3P DELETION; GASTRIC CANCER; JAKV617F; POLYCYTHEMIA VERA	10.1007/s12029-010-9142-3	ARTICLE	AGED; CHROMOSOME DELETION; CHROMOSOMES; HUMAN; PAIR 3; CORONARY DISEASE; DIABETES MELLITUS; TYPE 2; HUMANS; HYPERTENSION; JANUS KINASE 2; MUTATION; NEOPLASMS; MULTIPLE PRIMARY; POLYCYTHEMIA VERA; POLYMERASE CHAIN REACTION; STOMACH NEOPLASMS; ACETYLSALICYLIC ACID; AMLODIPINE; EPIRUBICIN; FLUOROURACIL; INSULIN; JANUS KINASE 2; AGED; ARTICLE; CASE REPORT; COMPUTER ASSISTED TOMOGRAPHY; GASTRECTOMY; G…	J GASTROINTEST CANCER	J. GASTROINTEST. CANCER	ENGLISH		2010	I. YAVASOGLU; DIVISION OF HEMATOLOGY, ADNAN MENDERES UNIVERSITY MEDICAL FACULTY, AYDIN 09100, TURKEY; EMAIL: DR_YAVAS@YAHOO.COM	19416636	JOURNAL OF GASTROINTESTINAL CANCER	1	THE DEVELOPMENT OF GASTRIC CANCER IN A PATIENT WITH POLYCYTHEMIA VERA 3P DELETION AND JAK2 V617F MUTATION	41	ISI	ADNAN MENDERES UNIVERSITY MEDICAL FACULTY;ADNAN MENDERES UNIVERSITY MEDICAL FACULTY	NOTREPORTED;ADNAN MENDERES UNIVERSITY MEDICAL FACULTY;NOTREPORTED		AYVAZ O, 2010, J GASTROINTEST CANCER	AYVAZ O, 2010, J GASTROINTEST CANCER
BACCI S;MENZAGHI C;ERCOLINO T;MA X;RAUSEO A;SALVEMINI L;VIGNA C;FANELLI R;DI M U;DORIA A;TRISCHITTA V	none	OBJECTIVE - TWO SINGLE NUCLEOTIDE POLYMORPHISMS (SNPS) AT THE ADIPONECTIN LOCUS (+45T>G AND +276G>T) HAVE BEEN ASSOCIATED WITH LOW CIRCULATING ADIPONECTIN LEVELS, INSULIN RESISTANCE, AND TYPE 2 DIABETES. WE INVESTIGATED WHETHER THESE GENETIC MARKERS ARE DETERMINANTS OF CORONARY ARTERY DISEASE (CAD) IN TYPE 2 DIABETIC PATIENTS. RESEARCH DESIGN AND METHODS - A TOTAL OF 376 CONSECUTIVE TYPE 2 DIABET…	CARDIOVASC. AND ENDOCRINE DEPARTMENT, SCIENTIFIC INSTITUTE, CASA SOLLIEVO DELLA SOFFERENZA, SAN GIOVANNI ROTONDO, ITALY; RESEARCH DIVISION, JOSLIN DIABETES CENTER, BOSTON, MA, UNITED STATES; DEPARTMENT OF CLINICAL SCIENCES, UNIVERSITY LA SAPIENZA, ROME, ITALY; CASA SOLLIEVO DELLA SOFFERENZA, SCIENTIFIC INSTITUTE, UNIT OF ENDOCRINOLOGY, 71013 SAN GIOVANNI ROTONDO, FOGGIA, VIALE CAPPUCCINI 1, ITALY		10.2337/diacare.27.8.2015	ARTICLE	ADIPONECTIN; CORONARY DISEASE; CORONARY STENOSIS; DIABETES MELLITUS; TYPE 2; DIABETIC ANGIOPATHIES; ELECTROCARDIOGRAPHY; EXERCISE TEST; FEMALE; GENOTYPE; HOMOZYGOTE; HUMANS; INTERCELLULAR SIGNALING PEPTIDES AND PROTEINS; MALE; MIDDLE AGED; POLYMORPHISM; SINGLE NUCLEOTIDE; REFERENCE VALUES; ADIPONECTIN; GUANINE; INSULIN; NUCLEOTIDE; THYMINE; ADULT; AGED; ANGIOGRAPHY; ARTICLE; ATHEROGENESIS; CONTRO…	DIABETES CARE	DIABETES CARE	ENGLISH		2004	S. BACCI; CASA SOLLIEVO DELLA SOFFERENZA, SCIENTIFIC INSTITUTE, UNIT OF ENDOCRINOLOGY, 71013 SAN GIOVANNI ROTONDO, FOGGIA, VIALE CAPPUCCINI 1, ITALY; EMAIL: ENDOCRINO@OPERAPADREPIO.IT	01495992	DIABETES CARE	120	THE 276 GT SINGLE NUCLEOTIDE POLYMORPHISM OF THE ADIPONECTIN GENE IS ASSOCIATED WITH CORONARY ARTERY DISEASE IN TYPE 2 DIABETIC PATIENTS	27	ISI	SCIENTIFIC INSTITUTE;JOSLIN DIABETES CENTER;UNIVERSITY LA SAPIENZA;SCIENTIFIC INSTITUTE	NOTREPORTED;SCIENTIFIC INSTITUTE;NOTREPORTED		BACCI S, 2004, DIABETES CARE	BACCI S, 2004, DIABETES CARE
BARKER D	ADAIR LS, 2001, CIRCULATION, V104, P1034, DOI 10.1161/HC3401.095037;ANONYMOUS, 2010, PLACENTA HUMAN DEV P;BARKER DJP, 2011, AM J HUM BIOL, V23, P412, DOI 10.1002/AJHB.21165;BARKER DJP, 2010, EUR J HEART FAIL, V12, P819, DOI 10.1093/EURJHF/HFQ069;BARKER DJP, 2010, AM J HUM BIOL, V22, P512, DOI 10.1002/AJHB.21041;BARKER DJP, 2010, INT J DEV BIOL, V54, P525, DOI 10.1387/IJDB.082760DB;BARKER DJP, 198…	CORONARY HEART DISEASE, TYPE 2 DIABETES, BREAST CANCER AND MANY OTHER CHRONIC DISEASES ARE UNNECESSARY. THEIR OCCURRENCE IS NOT MANDATED BY GENES PASSED DOWN TO US THROUGH THOUSANDS OF YEARS OF EVOLUTION. CHRONIC DISEASES ARE NOT THE INEVITABLE LOT OF HUMANKIND. THEY ARE THE RESULT OF THE CHANGING PATTERN OF HUMAN DEVELOPMENT. WE COULD READILY PREVENT THEM, HAD WE THE WILL TO DO SO. PREVENTION OF…	UNIV SOUTHAMPTON, SCH MED, SOUTHAMPTON, HANTS, ENGLAND.; OREGON HLTH & SCI UNIV, HEART RES CTR, PORTLAND, OR 97201 USA.;	FETAL PROGRAMMING; CHRONIC DISEASE; MATERNAL NUTRITION; PLACENTA	10.1016/j.puhe.2011.11.014	ARTICLE	CORONARY-HEART-DISEASE; BODY-MASS INDEX; BLOOD-PRESSURE; INSULIN-RESISTANCE; FETAL ORIGINS; BIRTH-WEIGHT; CARDIOVASCULAR-DISEASE; MATERNAL WEIGHT; PREGNANCY; GROWTH	PUBLIC HEALTH	PUBLIC HEALTH	ENGLISH	W B SAUNDERS CO LTD	2012	BARKER, DJP (CORRESPONDING AUTHOR), SOUTHAMPTON GEN HOSP, MRC LIFECOURSE EPIDEMIOL UNIT, MAILPOINT 95, SOUTHAMPTON SO16 6YD, HANTS, ENGLAND.	0033-3506	PUBLIC HEALTH	266	DEVELOPMENTAL ORIGINS OF CHRONIC DISEASE	126	ISI	UNIVERSITY OF SOUTHAMPTON; OREGON HEALTH AND SCIENCE UNIVERSITY	SOUTHAMPTON GEN HOSP		BARKER DJP, 2012, PUBLIC HEALTH	BARKER DJP, 2012, PUBLIC HEALTH
BARUA J;OMIT S;RANA H;PODDER N;CHOWDHURY U;RAHMAN M	AL RAWAHI ABDUL HAKEEM, 2017, OMAN MED J, V32, P106, DOI 10.5001/OMJ.2017.20;ALISSA EM, 2011, J TOXICOL-US, V2011, DOI 10.1155/2011/870125;AMBERGER JS, 2019, NUCLEIC ACIDS RES, V47, PD1038, DOI 10.1093/NAR/GKY1151;AMIN F, 2015, J MED BIOCHEM, V34, P402, DOI 10.2478/JOMB-2014-0066;ANDREOTTI F, 2002, HEART, V87, P107, DOI 10.1136/HEART.87.2.107;ANONYMOUS, GEO2R GEO NCBI;ANONYMOUS, 2022, AM COLL CAR…	BACKGROUND. CARDIOVASCULAR DISEASE (CVD) IS THE COMBINATION OF CORONARY HEART DISEASE, MYOCARDIAL INFARCTION, RHEUMATIC HEART DISEASE, AND PERIPHERAL VASCULAR DISEASE OF THE HEART AND BLOOD VESSELS. IT IS ONE OF THE LEADING DEADLY DISEASES THAT CAUSES ONE-THIRD OF THE DEATHS YEARLY IN THE GLOBE. ADDITIONALLY, THE RISK FACTORS ASSOCIATED WITH IT MAKE THE SITUATION MORE COMPLEX FOR CARDIOVASCULAR P…	BGC TRUST UNIV BANGLADESH, DEPT PHARM, CHATTOGRAM, BANGLADESH.; NOAKHALI SCI & TECHNOL UNIV, DEPT COMP SCI & TELECOMMUN ENGN, NOAKHALI, BANGLADESH.; GREEN UNIV BANGLADESH, DEPT COMP SCI & ENGN, DHAKA, BANGLADESH.; BANGLADESH INST GOVERNANCE & MANAGEMENT BIGM, DHAKA, BANGLADESH.; KHULNA UNIV ENGN & TECHNOL, DEPT COMP SCI & ENGN, KHULNA, BANGLADESH.; UNIV RAJSHAHI, DEPT COMP SCI & ENGN, RAJSHAHI, B…		10.1155/2022/9034996	ARTICLE	CARDIAC MYOCYTE; HEART-DISEASE; ATHEROSCLEROSIS; ASSOCIATION; MECHANISMS; MICROARRAY; DATABASE; PATHWAY; BLOOD; PATHOPHYSIOLOGY	CARDIOVASC THER	CARDIOVASC. THER.	ENGLISH	WILEY-HINDAWI	2022	RAHMAN, MH (CORRESPONDING AUTHOR), ISLAMIC UNIV, DEPT COMP SCI & ENGN, KUSHTIA 7003, BANGLADESH.	1755-5914	CARDIOVASCULAR THERAPEUTICS	2	BIOINFORMATICS AND SYSTEM BIOLOGICAL APPROACHES FOR THE IDENTIFICATION OF GENETIC RISK FACTORS IN THE PROGRESSION OF CARDIOVASCULAR DISEASE	2022	ISI	NOAKHALI SCIENCE AND TECHNOLOGY UNIVERSITY (NSTU); KHULNA UNIVERSITY OF ENGINEERING AND TECHNOLOGY (KUET); UNIVERSITY OF RAJSHAHI; ISLAMIC UNIVERSITY	ISLAMIC UNIV		BARUA JD, 2022, CARDIOVASC THER	BARUA JD, 2022, CARDIOVASC THER
BASS R;ENELI I	none	CHILDHOOD OBESITY IS A SERIOUS AND URGENT PUBLIC HEALTH PROBLEM. IN THE LAST 10 YEARS, THERE HAS BEEN A CONCERTED EFFORT IN THE USA AND GLOBALLY TO DEVELOP AND IMPLEMENT EDUCATIONAL, MEDICAL AND PUBLIC HEALTH INTERVENTIONS DESIGNED TO ATTENUATE ITS GROWTH. THE SUCCESS OF THESE EFFORTS WAS PROBABLY RESPONSIBLE FOR THE PLATEAU IN THE PREVALENCE RATE OF CHILDHOOD OBESITY NOTED IN THE LAST TWO YEARS.…	THE CHILDREN’S HOSPITAL OF PHILADELPHIA, PHILADELPHIA, PA, UNITED STATES; CENTER FOR HEALTHY WEIGHT AND NUTRITION, NATIONWIDE CHILDREN’S HOSPITAL, COLUMBUS, OH, UNITED STATES		10.1136/postgradmedj-2014-133033	ARTICLE	ADOLESCENT; CHILD; CORONARY DISEASE; FATTY LIVER; GENETIC PREDISPOSITION TO DISEASE; HUMANS; LIFE STYLE; METABOLIC SYNDROME X; MUSCULOSKELETAL DISEASES; NUTRITION SURVEYS; OBESITY; MORBID; PEDIATRIC OBESITY; PRIMARY PREVENTION; PUBLIC HEALTH; RISK FACTORS; SOCIAL ENVIRONMENT; WEIGHT LOSS; EXENDIN 4; MELANOCORTIN; METFORMIN; SIBUTRAMINE; TETRAHYDROLIPSTATIN; ARTICLE; BARIATRIC SURGERY; CHILDHOOD O…	POSTGRAD MED J	POSTGRAD. MED. J.	ENGLISH	BMJ PUBLISHING GROUP	2015	R. BASS; THE CHILDREN’S HOSPITAL OF PHILADELPHIA, PHILADELPHIA, 34TH STREET AND CIVIC CENTER BOULEVARD, 19104, UNITED STATES; EMAIL: BASSR@EMAIL.CHOP.EDU	00325473	POSTGRADUATE MEDICAL JOURNAL	107	SEVERE CHILDHOOD OBESITY AN UNDERRECOGNISED AND GROWING HEALTH PROBLEM	91	ISI	THE CHILDREN’S HOSPITAL OF PHILADELPHIA;CENTER FOR HEALTHY WEIGHT AND NUTRITION	NOTREPORTED;NOTDECLARED;NOTREPORTED		BASS R, 2015, POSTGRAD MED J	BASS R, 2015, POSTGRAD MED J
BEANEY K;COOPER J;MCLACHLAN S;WANNAMETHEE S;JEFFERIS B;WHINCUP P;BEN-SHLOMO Y;PRICE J;KUMARI M;WONG A;ONG K;HARDY R;KUH D;KIVIMAKI M;KANGAS A;SOININEN P;ALA-KORPELA M;DRENOS F;HUMPHRIES S	none	AIMS: AN INTERGENIC LOCUS ON CHROMOSOME 1 (LEAD SNP RS10911021) WAS PREVIOUSLY ASSOCIATED WITH CORONARY HEART DISEASE (CHD) IN TYPE 2 DIABETES (T2D). USING DATA FROM THE UCLEB CONSORTIUM WE INVESTIGATED THE RELATIONSHIP BETWEEN RS10911021 AND CHD IN T2D, WHETHER RS10911021 WAS ASSOCIATED WITH LEVELS OF AMINO ACIDS INVOLVED IN THE Γ-GLUTAMYL CYCLE OR ANY CONVENTIONAL RISK FACTORS (CRFS) FOR CHD IN…	MRC INTEGRATIVE EPIDEMIOLOGY UNIT, SCHOOL OF SOCIAL AND COMMUNITY MEDICINE, UNIVERSITY OF BRISTOL, BRISTOL, UNITED KINGDOM; MRC INTEGRATIVE EPIDEMIOLOGY UNIT, SCHOOL OF SOCIAL AND COMMUNITY MEDICINE, UNIVERSITY OF BRISTOL, BRISTOL, UNITED KINGDOM; MRC INTEGRATIVE EPIDEMIOLOGY UNIT, SCHOOL OF SOCIAL AND COMMUNITY MEDICINE, UNIVERSITY OF BRISTOL, BRISTOL, UNITED KINGDOM; MRC INTEGRATIVE EPIDEMIOLOG…	CORONARY HEART DISEASE; GENETIC RISK; HDL-CHOLESTEROL; METABOLOMICS	10.1186/s12933-016-0435-0	ARTICLE	AGED; AMINO ACIDS; BIOMARKERS; CHOLESTEROL; HDL; CHROMOSOMES; HUMAN; PAIR 1; CORONARY DISEASE; DIABETES MELLITUS; TYPE 2; DNA; INTERGENIC; DOWN-REGULATION; FEMALE; GENE FREQUENCY; GENETIC ASSOCIATION STUDIES; GENETIC PREDISPOSITION TO DISEASE; HIGH-THROUGHPUT SCREENING ASSAYS; HUMANS; MAGNETIC RESONANCE SPECTROSCOPY; MALE; METABOLOMICS; MIDDLE AGED; PARTICLE SIZE; PHENOTYPE; POLYMORPHISM; SINGLE …	CARDIOVASC DIABETOL	CARDIOVASC DIABETOL	ENGLISH		2016		14752840	CARDIOVASCULAR DIABETOLOGY	8	VARIANT RS10911021 THAT ASSOCIATES WITH CORONARY HEART DISEASE IN TYPE 2 DIABETES IS ASSOCIATED WITH LOWER CONCENTRATIONS OF CIRCULATING HDL CHOLESTEROL AND LARGE HDL PARTICLES BUT NOT WITH AMINO ACIDS	15	ISI	UNIVERSITY OF BRISTOL;UNIVERSITY OF BRISTOL;UNIVERSITY OF BRISTOL;UNIVERSITY OF BRISTOL;UNIVERSITY OF BRISTOL;UNIVERSITY OF BRISTOL;UNIVERSITY OF BRISTOL;UNIVERSITY OF BRISTOL;UNIVERSITY OF BRISTOL;UNIVERSITY OF BRISTOL;UNIVERSITY OF BRISTOL;UNIVERSITY OF BRISTOL	UNIVERSITY OF BRISTOL;UNIVERSITY OF BRISTOL;UNIVERSITY OF BRISTOL;UNIVERSITY OF BRISTOL;UNIVERSITY OF BRISTOL;UNIVERSITY OF BRISTOL;UNIVERSITY OF BRISTOL;UNIVERSITY OF BRISTOL;UNIVERSITY OF BRISTOL;UNIVERSITY OF BRISTOL;UNIVERSITY OF BRISTOL;UNIVERSITY OF BRISTOL		BEANEY KE, 2016, CARDIOVASC DIABETOL	BEANEY KE, 2016, CARDIOVASC DIABETOL
BEANEY K;WARD C;BAPPA D;MCGALE N;DAVIES A;HIRANI S;LI K;HOWARD P;VANCE D;CROCKARD M;LAMONT J;NEWMAN S;HUMPHRIES S	none	BACKGROUND: THE CORONARY RISK IN DIABETES (CORDIA) TRIAL (N = 211) COMPARES THE EFFECTIVENESS OF USUAL DIABETES CARE WITH A SELF-MANAGEMENT INTERVENTION (SMI), WITH AND WITHOUT PERSONALISED RISK INFORMATION (INCLUDING GENETICS), ON CLINICAL AND BEHAVIOURAL OUTCOMES. HERE WE PRESENT AN ASSESSMENT OF RANDOMISATION, THE CARDIAC RISK GENOTYPING ASSAY, AND THE GENETIC CHARACTERISTICS OF THE RECRUITS. …	UNIVERSITY COLLEGE LONDON, BRITISH HEART FOUNDATION LABORATORIES, CENTRE FOR CARDIOVASCULAR GENETICS, INSTITUTE OF CARDIOVASCULAR SCIENCE, UNIVERSITY STREET, LONDON, UNITED KINGDOM; RANDOX LABORATORIES LTD, MOLECULAR DIAGNOSTICS GROUP, CRUMLIN, UNITED KINGDOM; CITY UNIVERSITY LONDON, SCHOOL OF HEALTH SCIENCES, NORTHAMPTON SQUARE, LONDON, UNITED KINGDOM	CORONARY HEART DISEASE; GENE SCORE; RISK PREDICTION; TYPE 2 DIABETES; UKPDS SCORE	10.1186/s12933-016-0457-7	ARTICLE	ADULT; AGED; CASE-CONTROL STUDIES; CORONARY ARTERY DISEASE; DIABETES MELLITUS; TYPE 2; DIABETIC ANGIOPATHIES; FEMALE; GENE EXPRESSION PROFILING; GENETIC ASSOCIATION STUDIES; GENETIC MARKERS; GENETIC PREDISPOSITION TO DISEASE; HUMANS; MALE; MIDDLE AGED; OLIGONUCLEOTIDE ARRAY SEQUENCE ANALYSIS; PHENOTYPE; POLYMORPHISM; SINGLE NUCLEOTIDE; PRECISION MEDICINE; PREDICTIVE VALUE OF TESTS; PREGNANCY; RIS…	CARDIOVASC DIABETOL	CARDIOVASC. DIABETOL.	ENGLISH	BIOMED CENTRAL LTD.	2016	S.E. HUMPHRIES; UNIVERSITY COLLEGE LONDON, BRITISH HEART FOUNDATION LABORATORIES, CENTRE FOR CARDIOVASCULAR GENETICS, INSTITUTE OF CARDIOVASCULAR SCIENCE, LONDON, UNIVERSITY STREET, UNITED KINGDOM; EMAIL: STEVE.HUMPHRIES@UCL.AC.UK	14752840	CARDIOVASCULAR DIABETOLOGY	7	A 19SNP CORONARY HEART DISEASE GENE SCORE PROFILE IN SUBJECTS WITH TYPE 2 DIABETES THE CORONARY HEART DISEASE RISK IN TYPE 2 DIABETES CORDIA STUDY STUDY BASELINE CHARACTERISTICS	15	ISI	UNIVERSITY COLLEGE LONDON;RANDOX LABORATORIES LTD;CITY UNIVERSITY LONDON	NOTREPORTED;UNIVERSITY COLLEGE LONDON;NOTREPORTED		BEANEY KE, 2016, CARDIOVASC DIABETOL	BEANEY KE, 2016, CARDIOVASC DIABETOL-a
BELLOMO T;BONE W;CHEN B;GAWRONSKI K;ZHANG D;PARK J;LEVIN M;TSAO N;KLARIN D;LYNCH J;ASSIMES T;GAZIANO J;WILSON P;CHO K;VUJKOVIC M;O'DONNELL C;CHANG K;TSAO P;RADER D;RITCHIE M;DAMRAUER S;VOIGHT B	ALTSHULER DM, 2012, NATURE, V491, P56, DOI 10.1038/NATURE11632;BASELMANS BML, 2019, NAT GENET, V51, P445, DOI 10.1038/S41588-018-0320-8;BENJAMIN EJ, 2019, CIRCULATION, V139, PE56, DOI 10.1161/CIR.0000000000000659, 10.1161/CIR.0000000000000746;BEUTLER LR, 2020, ELIFE, V9, DOI 10.7554/ELIFE.55909;BUNIELLO A, 2019, NUCLEIC ACIDS RES, V47, PD1005, DOI 10.1093/NAR/GKY1120;BYUN S, 2010, ARCH BIOCHEM BI…	ALTHOUGH AFFECTING DIFFERENT ARTERIAL TERRITORIES, THE RELATED ATHEROSCLEROTIC VASCULAR DISEASES CORONARY ARTERY DISEASE (CAD) AND PERIPHERAL ARTERY DISEASE (PAD) SHARE SIMILAR RISK FACTORS AND HAVE SHARED PATHOBIOLOGY. TO IDENTIFY NOVEL PLEIOTROPIC LOCI ASSOCIATED WITH ATHEROSCLEROSIS, WE PERFORMED A JOINT ANALYSIS OF THEIR SHARED GENETIC ARCHITECTURE, ALONG WITH THAT OF COMMON RISK FACTORS. USI…	UNIV PENN, DEPT SURG, PERELMAN SCH MED, PHILADELPHIA, PA 19104 USA.; UNIV PENN, GENOM & COMPUTAT BIOL GRAD GRP, PERELMAN SCH MED, PHILADELPHIA, PA 19104 USA.; UNIV PENN, SCH ARTS & SCI, PHILADELPHIA, PA 19104 USA.; UNIV PENN, DEPT GENET, PHILADELPHIA, PA 19104 USA.; UNIV PENN, DEPT MED, DIV CARDIOVASC MED, PERELMAN SCH MED, PHILADELPHIA, PA 19104 USA.; CORPORAL MICHAEL J CRESCENZ VA MED CTR, PHIL…	PERIPHERAL ARTERY DISEASE; ATHEROSCLEROSIS; MULTI-TRAIT ANALYSES; GWAS-GENOME-WIDE ASSOCIATION STUDY; PLEIOTROPY	10.3389/fgene.2021.787545	ARTICLE	PERIPHERAL ARTERY-DISEASE; GENETIC-VARIATION; IDENTIFICATION; VARIANTS; PATHWAYS; PROTEASE; INDEX; PCSK6; UK	FRONT GENET	FRONT. GENET.	ENGLISH	FRONTIERS MEDIA SA	2022	VOIGHT, BF (CORRESPONDING AUTHOR), UNIV PENN, DEPT GENET, PHILADELPHIA, PA 19104 USA.; VOIGHT, BF (CORRESPONDING AUTHOR), CORPORAL MICHAEL J CRESCENZ VA MED CTR, PHILADELPHIA, PA 19104 USA.; VOIGHT, BF (CORRESPONDING AUTHOR), UNIV PENN, PERELMAN SCH MED, INST TRANSLAT MED & THERAPEUT, PHILADELPHIA, PA 19104 USA.; VOIGHT, BF (CORRESPONDING AUTHOR), UNIV PENN, INST BIOMED INFORMAT, PERELMAN SCH MED…		FRONTIERS IN GENETICS	1	MULTITRAIT GENOMEWIDE ASSOCIATION STUDY OF ATHEROSCLEROSIS DETECTS NOVEL PLEIOTROPIC LOCI	12	ISI	UNIVERSITY OF PENNSYLVANIA; UNIVERSITY OF PENNSYLVANIA; UNIVERSITY OF PENNSYLVANIA; UNIVERSITY OF PENNSYLVANIA; UNIVERSITY OF PENNSYLVANIA; US DEPARTMENT OF VETERANS AFFAIRS; VETERANS HEALTH ADMINISTRATION (VHA); HARVARD UNIVERSITY; VA BOSTON HEALTHCARE SYSTEM; HARVARD UNIVERSITY; MASSACHUSETTS GENERAL HOSPITAL; STATE UNIVERSITY SYSTEM OF FLORIDA; UNIVERSITY OF FLORIDA; HARVARD UNIVERSITY; MASSAC…	UNIV PENN;CORPORAL MICHAEL J CRESCENZ VA MED CTR;UNIV PENN;UNIV PENN;UNIV PENN		BELLOMO TR, 2022, FRONT GENET	BELLOMO TR, 2022, FRONT GENET
BERNARD S;CHARRIÈRE S;CHARCOSSET M;BERTHEZÈNE F;MOULIN P;SASSOLAS A	none	AIM: TO EVALUATE IN A PROSPECTIVE STUDY THE ASSOCIATION OF XBA1 APOLIPOPROTEIN B (APOB) GENE POLYMORPHISM WITH LIPID PARAMETERS AND CARDIOVASCULAR (CV) EVENTS IN A TYPE 2 DIABETIC COHORT. METHODS AND RESULTS: A COHORT OF 212 TYPE 2 DIABETIC PATIENTS, FREE OF ANY CARDIOVASCULAR COMPLICATION, WAS STUDIED. CARDIOVASCULAR EVENTS WERE REGISTERED FOR ALL THE PATIENTS FOR 5 YEARS. XBA1 APOLIPOPROTEIN B …	UNIT 11 ENDOCRINOLOGY, DIABETES AND NUTRITION DEPARTMENT, HOP. CARDIOVASCULAIRE LOUIS PRADEL, 69003 LYON-MONTCHAT, FRANCE; BIOLOGY DEPARTMENT, HOPITAL NEUROLOGIQUE, 69003 LYON, FRANCE	APOB; APOLIPOPROTEIN B; BMI; BODY MASS INDEX; CHD; CORONARY HEART DISEASE; CPK; CREATINE PHOSPHOKINASE; DEOXYRIBONUCLEIC ACID; DNA; ECG; EDTA; ELECTROCARDIOGRAM; ETHYLENEDIAMINETETRAACETIC ACID; GLYCATED HAEMOGLOBIN; HBA1C; HDL-C; HIGH-DENSITY LIPOPROTEIN-CHOLESTEROL	10.1016/j.atherosclerosis.2004.03.017	ARTICLE	APOLIPOPROTEINS B; CARDIOVASCULAR DISEASES; COHORT STUDIES; DIABETES MELLITUS; TYPE 2; FEMALE; HEMOGLOBIN A; GLYCOSYLATED; HUMANS; LIPIDS; LIPOPROTEINS; MALE; MIDDLE AGED; POLYMORPHISM; GENETIC; RISK FACTORS; APOLIPOPROTEIN B; APOLIPOPROTEIN B XBA1; LIPID; UNCLASSIFIED DRUG; ADULT; AGED; ARTICLE; CARDIOVASCULAR RISK; COHORT ANALYSIS; FEMALE; GENETIC POLYMORPHISM; GENOTYPE; HUMAN; MAJOR CLINICAL S…	ATHEROSCLEROSIS	ATHEROSCLEROSIS	ENGLISH		2004	P. MOULIN; UNIT 11 ENDOCRINOLOGY, DIABETES AND NUTRITION DEPARTMENT, HOP. CARDIOVASCULAIRE LOUIS PRADEL, 69003 LYON-MONTCHAT, FRANCE; EMAIL: PHILIPPE.MOULIN@CHU-LYON.FR	00219150	ATHEROSCLEROSIS	6	RELATION BETWEEN XBA1 APOLIPOPROTEIN B GENE POLYMORPHISM AND CARDIOVASCULAR RISK IN A TYPE 2 DIABETIC COHORT	175	ISI	NOTREPORTED	NOTREPORTED;NOTREPORTED;NOTREPORTED		BERNARD S, 2004, ATHEROSCLEROSIS	BERNARD S, 2004, ATHEROSCLEROSIS
BERNARD S;LOFFROY R;SÉRUSCLAT A;BOUSSEL L;BONNEFOY E;THÉVENON C;RABILLOUD M;REVEL D;MOULIN P;DOUEK P	none	OBJECTIVE: THE COMBINATION OF BOTH MORPHOLOGICAL AND CELLULAR MARKERS OF SUBCLINICAL ATHEROSCLEROSIS, IN ADDITION TO CONVENTIONAL RISK FACTORS, MAY HELP TO IMPROVE CARDIOVASCULAR PREVENTION IN TYPE 2 DIABETIC PATIENTS. THE AIM OF OUR CROSS-SECTIONAL STUDY WAS TO EVIDENCE A PUTATIVE INCREASE IN ENDOTHELIAL (EMP) OR PLATELET (PMP) MICROPARTICLES, IN TYPE 2 DIABETIC PATIENTS WITH CORONARY NONCALCIFI…	ENDOCRINOLOGY, DIABETES AND NUTRITION DEPARTMENT, CARDIOVASCULAR HOSPITAL, F-69677 LYON, HOSPICES CIVILS DE LYON, FRANCE; INSERM, F-69621 VILLEURBANNE, U870, FRANCE; INRA, F-69600 OULLINS, UMR1235, FRANCE; INSA-LYON, RMND, F-69621 VILLEURBANNE, FRANCE; RADIOLOGY DEPARTMENT, CARDIOVASCULAR HOSPITAL, HOSPICES CIVILS DE LYON, FRANCE; INTENSIVE CARE UNIT, CARDIOVASCULAR HOSPITAL, HOSPICES CIVILS DE L…	MICROPARTICLES; NONCALCIFIED PLAQUES; TYPE 2 DIABETES	10.1016/j.atherosclerosis.2008.07.039	ARTICLE	AGED; ANTIGENS; CD; ATHEROSCLEROSIS; BIOLOGICAL MARKERS; BLOOD PLATELETS; CADHERINS; CORONARY DISEASE; CROSS-SECTIONAL STUDIES; DIABETES MELLITUS; TYPE 2; ENDOTHELIUM; VASCULAR; FEMALE; GENE EXPRESSION REGULATION; HUMANS; MALE; MIDDLE AGED; TOMOGRAPHY; X-RAY COMPUTED; ANTITHROMBOCYTIC AGENT; BETA ADRENERGIC RECEPTOR BLOCKING AGENT; CALCIUM ANTAGONIST; CELL MARKER; DIPEPTIDYL CARBOXYPEPTIDASE INHI…	ATHEROSCLEROSIS	ATHEROSCLEROSIS	ENGLISH		2009	S. BERNARD; ENDOCRINOLOGY, DIABETES AND NUTRITION DEPARTMENT, CARDIOVASCULAR HOSPITAL, F-69677 LYON, HOSPICES CIVILS DE LYON, FRANCE; EMAIL: SOPHIE.BERNARD@CHU-LYON.FR	00219150	ATHEROSCLEROSIS	62	INCREASED LEVELS OF ENDOTHELIAL MICROPARTICLES CD144 VECADHERIN POSITIVES IN TYPE 2 DIABETIC PATIENTS WITH CORONARY NONCALCIFIED PLAQUES EVALUATED BY MULTIDETECTOR COMPUTED TOMOGRAPHY MDCT	203	ISI	CARDIOVASCULAR HOSPITAL;CARDIOVASCULAR HOSPITAL;CARDIOVASCULAR HOSPITAL;UNIVERSITÉ CLAUDE BERNARD LYON I;HOSPICES CIVILS DE LYON	NOTREPORTED;CARDIOVASCULAR HOSPITAL;NOTREPORTED		BERNARD S, 2009, ATHEROSCLEROSIS	BERNARD S, 2009, ATHEROSCLEROSIS
BEST L;DAVIDSON M;NORTH K;MACCLUER J;ZHANG Y;LEE E;HOWARD B;DECROO S;FERRELL R	none	BACKGROUND-MANNOSE-BINDING LECTIN (MBL) IS A CIRCULATING IMMUNE FACTOR RESPONSIBLE FOR OPSONIZATION OF PATHOGENS AND DIRECTLY ACTIVATING COMPLEMENT. COMMON VARIATIONS IN THE MBL GENE ARE RESPONSIBLE FOR AN OPSONIC DEFICIENCY THAT AFFECTS 5% TO 7% OF WHITES AND ARE ASSOCIATED WITH INCREASED SUSCEPTIBILITY TO INFECTIONS. AFTER A PRELIMINARY REPORT ASSOCIATING THESE VARIATIONS WITH CORONARY ARTERY D…	MISSOURI BREAKS INDUST. RES. INC., TIMBER LAKE, SD, UNITED STATES; MEDSTAR RESEARCH INSTITUTE, WASHINGTON, DC, UNITED STATES; UNIVERSITY OF NORTH CAROLINA, CHAPEL HILL, NC, UNITED STATES; SW FOUND. FOR BIOMEDICAL RESEARCH, SAN ANTONIO, TX, UNITED STATES; UNIV. OF OKLAHOMA HLTH. SCI. CENTER, OKLAHOMA CITY, OK, UNITED STATES; UNIVERSITY OF PITTSBURGH, PITTSBURGH, PA, UNITED STATES; BOX 88, ROLETTE,…	CORONARY DISEASE; EPIDEMIOLOGY; GENETICS; IMMUNE SYSTEM; INFLAMMATION	10.1161/01.CIR.0000109757.95461.10	ARTICLE	COHORT STUDIES; CORONARY ARTERIOSCLEROSIS; FEMALE; GENOTYPE; HUMANS; INCIDENCE; INDIANS; NORTH AMERICAN; LONGITUDINAL STUDIES; MALE; MANNOSE-BINDING LECTIN; MIDDLE AGED; PROSPECTIVE STUDIES; VARIATION (GENETICS); ANTIBODY; FIBRINOGEN; MANNOSE BINDING LECTIN; TRIACYLGLYCEROL; ADULT; AGED; ALLELE; AMERICAN INDIAN; ARTICLE; CARDIOVASCULAR RISK; COHORT ANALYSIS; COMPLEMENT ACTIVATION; CONTROLLED STUD…	CIRCULATION	CIRCULATION	ENGLISH		2004	L.G. BEST; BOX 88, ROLETTE, ND 58366, #1 AIRPORT RD, UNITED STATES; EMAIL: SBEST@UTMA.COM	00097322	CIRCULATION	102	PROSPECTIVE ANALYSIS OF MANNOSEBINDING LECTIN GENOTYPES AND CORONARY ARTERY DISEASE IN AMERICAN INDIANS THE STRONG HEART STUDY	109	ISI	MISSOURI BREAKS INDUST. RES. INC.;MEDSTAR RESEARCH INSTITUTE;UNIVERSITY OF NORTH CAROLINA;SW FOUND. FOR BIOMEDICAL RESEARCH;UNIV. OF OKLAHOMA HLTH. SCI. CENTER;UNIVERSITY OF PITTSBURGH	NOTREPORTED;NOTREPORTED;NOTREPORTED		BEST LG, 2004, CIRCULATION	BEST LG, 2004, CIRCULATION
BLÜHER M;KLEMM T;GERIKE T;KRANKENBERG H;SCHULER G;PASCHKE R	none	OBJECTIVE: RECENT EVIDENCE INDICATES THAT PEROXISOME PROLIFERATOR-ACTIVATED RECEPTOR-Γ (PPARΓ) IS EXPRESSED AT HIGH LEVELS IN FOAM CELLS OF ATHEROSCLEROTIC LESIONS, THAT PPARΓ AGONISTS MAY DIRECTLY MODULATE VESSEL WALL FUNCTION AND THAT MUTATIONS IN THE PPARΓ-2 GENE ARE ASSOCIATED WITH A REDUCED RISK OF CORONARY ARTERY DISEASE. METHODS: WE INVESTIGATED WHETHER KNOWN VARIANTS IN THE PPAR-Γ-2 GENE …	THIRD MEDICAL DEPARTMENT, LEIPZIG UNIVERSITY, D-04103 LEIPZIG, PHILIPP-ROSENTHAL STRASSE 27, GERMANY		10.1530/eje.0.1460545	ARTICLE	ALANINE; GLYCINE; HEMOGLOBIN A1C; LEUCINE; LOW DENSITY LIPOPROTEIN CHOLESTEROL; METHIONINE; PEROXISOME PROLIFERATOR ACTIVATED RECEPTOR GAMMA; PROLINE; VALINE; ADULT; AGE; AGED; ARTICLE; BODY MASS; CIGARETTE SMOKING; CONTROLLED STUDY; DENATURING GRADIENT GEL ELECTROPHORESIS; DISEASE ASSOCIATION; FEMALE; GENDER; GENE MUTATION; GENE SEQUENCE; GENETIC ASSOCIATION; GENETIC POLYMORPHISM; GENETIC VARIAB…	EUR J ENDOCRINOL	EUR. J. ENDOCRINOL.	ENGLISH	BIOSCIENTIFICA LTD.	2002	R. PASCHKE; THIRD MEDICAL DEPARTMENT, LEIPZIG UNIVERSITY, D-04103 LEIPZIG, PHILIPP-ROSENTHAL STRASSE 27, GERMANY; EMAIL: PASR@SERVER3.MEDIZIN.UNI-LEIPZIG.DE	08044643	EUROPEAN JOURNAL OF ENDOCRINOLOGY	30	LACK OF ASSOCIATION BETWEEN PEROXISOME PROLIFERATORACTIVATED RECEPTOR2 GENE VARIANTS AND THE OCCURRENCE OF CORONARY HEART DISEASE IN PATIENTS WITH DIABETES MELLITUS	146	ISI	LEIPZIG UNIVERSITY	R. PASCHKE;LEIPZIG UNIVERSITY;NOTREPORTED		BLÜHER M, 2002, EUR J ENDOCRINOL	BLÜHER M, 2002, EUR J ENDOCRINOL
BOIKO V;BILETSKYI S;PETRYNYCH O;KAZANTSEVA T;SHEREMET M	none	INTRODUCTION. CURRENTLY, NUMEROUS INVESTIGATIONS HAVE BEEN CONDUCTED TO STUDY THE ROLE OF VARIOUS GENES IN THE DEVELOPMENT OF ARTERIAL HYPERTENSION, BUT STILL THEY DO NOT CONTAIN DATA CONCERNING PATIENTS WITH COMORBID PATHOLOGY. OBJECTIVES. TO INVESTIGATE THE EFFECT OF PRO12ALA POLYMORPHISM OF THE PPAR2 GENE ON METABOLISM RATES IN PATIENTS WITH ESSENTIAL ARTERIAL HYPERTENSION ACCOMPANIED BY STABL…	DEPARTMENT OF GENERAL PRACTICE IN FAMILY MEDICINE, COMMUNAL MEDICAL FACILITY „MUNICIPAL POLYCLINIC NO3“, CHERNIVTSI, DEPARTMENT OF FAMILY MEDICINE, BUKOVINIAN STATE MEDICAL UNIVERSITY, UKRAINE; DEPARTMENT OF FAMILY MEDICINE, BUKOVINIAN STATE MEDICAL UNIVERSITY, UKRAINE; DEPARTMENT OF FAMILY MEDICINE, BUKOVINIAN STATE MEDICAL UNIVERSITY, UKRAINE; DEPARTMENT OF FAMILY MEDICINE, BUKOVINIAN STATE MED…	ESSENTIAL ARTERIAL HYPERTENSION; ISCHEMIC HEART DISEASE; METABOLISM; PPAR2 GENE POLYMORPHISM; TYPE 2 DIABETES MELLITUS		ARTICLE	ANTIOXIDANT; CARBOHYDRATE; CATALASE; CHOLESTEROL; GLUCOSE; GLUTATHIONE; GLUTATHIONE PEROXIDASE; HIGH DENSITY LIPOPROTEIN CHOLESTEROL; IMMUNOREACTIVE INSULIN; LIPID; LOW DENSITY LIPOPROTEIN CHOLESTEROL; MALONALDEHYDE; PEROXISOME PROLIFERATOR ACTIVATED RECEPTOR GAMMA 2; TRIACYLGLYCEROL; ADULT; AGED; ARTICLE; CARBOHYDRATE METABOLISM; COMPARATIVE STUDY; CONTROLLED STUDY; DNA POLYMORPHISM; ENZYME BLOO…	ARCH BALK MED UNION	ARCH. BALK. MED. UNION	ENGLISH	BALKAN MEDICAL UNION	2018	V.V. BOIKO; DEPARTMENT OF GENERAL PRACTICE IN FAMILY MEDICINE, COMMUNAL MEDICAL FACILITY „MUNICIPAL POLYCLINIC NO3“, CHERNIVTSI, DEPARTMENT OF FAMILY MEDICINE, BUKOVINIAN STATE MEDICAL UNIVERSITY, UKRAINE; EMAIL: V.V.BOIKO@UKR.NET	15849244	ARCHIVES OF THE BALKAN MEDICAL UNION	1	INFLUENCE OF THE PPAR2 GENE POLYMORPHISM ON SOME METABOLIC INDICES IN PATIENTS WITH ESSENTIAL ARTERIAL HYPERTENSION ACCOMPANIED BY ISCHEMIC HEART DISEASE AND TYPE 2 DIABETES MELLITUS	53	ISI	UKRAINE;BUKOVINIAN STATE MEDICAL UNIVERSITY;BUKOVINIAN STATE MEDICAL UNIVERSITY;BUKOVINIAN STATE MEDICAL UNIVERSITY;UKRAINE;BUKOVINIAN STATE MEDICAL UNIVERSITY	NOTREPORTED;BUKOVINIAN STATE MEDICAL UNIVERSITY;NOTREPORTED		BOIKO VV, 2018, ARCH BALK MED UNION	BOIKO VV, 2018, ARCH BALK MED UNION
BORONAT M;TUGORES A;SAAVEDRA P;GARAY P;BOSCH E;LORENZO D;IBARRA A;GARCÍA-CANTÓN C	none	CONTEXT. DIFFERENT POLYMORPHISMS OF THE ENDOTHELIAL NITRIC OXIDE SYNTHASE GENE (NOS3) HAVE BEEN RELATED TO DIABETIC KIDNEY DISEASE. OBJECTIVE. TO EVALUATE THE ASSOCIATION BETWEEN ADVANCED DIABETIC CHRONIC KIDNEY DISEASE (ACKD) AND THE RS1799983 AND RS2070744 POYMORPHISMS OF NOS3 IN A POPULATION FROM THE GRAN CANARIA ISLAND. DESIGN. CROSS-SECTIONAL CASE-CONTROL STUDY. SUBJECTS AND METHODS. POLYMOR…	UNIVERSITY OF LAS PALMAS DE GRAN CANARIA, FACULTY OF HEALTH SCIENCES, INSTITUTO UNIVERSITARIO DE INVESTIGACIONES BIOMÉDICAS Y SANITARIAS, SPAIN; MATHEMATICS DEPARTMENT-COMPLEJO HOSPITALARIO MATERNO-INSULAR, SPAIN; SECTION OF ENDOCRINOLOGY AND NUTRITION, SPAIN; RESEARCH UNIT, SPAIN; SERVICE OF NEPHROLOGY, SPAIN; UNIVERSIDAD FERNANDO PESSOA CANARIAS, LAS PALMAS DE GRAN CANARIA, SPAIN	CHRONIC KIDNEY DISEASE; CORONARY HEART DISEASE; DIABETIC NEPHROPATHY; ENDOTHELIAL NITRIC OXIDE SYNTHASE; NOS3; TYPE 2 DIABETES	10.4183/aeb.2021.440	ARTICLE	ENDOTHELIAL NITRIC OXIDE SYNTHASE; GLUCOCORTICOID; HIGH DENSITY LIPOPROTEIN CHOLESTEROL; LOW DENSITY LIPOPROTEIN CHOLESTEROL; TRIACYLGLYCEROL; ACUTE CORONARY SYNDROME; AGED; ALBUMIN TO CREATININE RATIO; ARTICLE; CASE CONTROL STUDY; CHRONIC KIDNEY FAILURE; CONTROLLED STUDY; CROSS-SECTIONAL STUDY; DIABETIC NEPHROPATHY; ESTIMATED GLOMERULAR FILTRATION RATE; FEMALE; GENETIC POLYMORPHISM; GENETIC VARI…	ACTA ENDOCRINOL (BUCHAREST)	ACTA ENDOCRINOL. (BUCHAREST)	ENGLISH	ACTA ENDOCRINOLOGICA FOUNDATION	2021	M. BORONAT; UNIVERSITY OF LAS PALMAS DE GRAN CANARIA, FACULTY OF HEALTH SCIENCES, INSTITUTO UNIVERSITARIO DE INVESTIGACIONES BIOMÉDICAS Y SANITARIAS, LAS PALMAS DE GRAN CANARIA, PASEO BLAS CABRERA FELIPE, 310, 35016, SPAIN; EMAIL: MBORCOR@GMAIL.COM	18410987	ACTA ENDOCRINOLOGICA	2	NOS3 RS1799983 AND RS2070744 POLYMORPHISMS AND THEIR ASSOCIATION WITH ADVANCED CHRONIC KIDNEY DISEASE AND CORONARY HEART DISEASE IN CANARIAN POPULATION WITH TYPE 2 DIABETES	17	ISI	UNIVERSITY OF LAS PALMAS DE GRAN CANARIA;MATHEMATICS DEPARTMENT-COMPLEJO HOSPITALARIO MATERNO-INSULAR;RESEARCH UNIT;UNIVERSIDAD FERNANDO PESSOA CANARIAS	NOTREPORTED;UNIVERSITY OF LAS PALMAS DE GRAN CANARIA;NOTREPORTED		BORONAT M, 2021, ACTA ENDOCRINOL (BUCHAREST)	BORONAT M, 2021, ACTA ENDOCRINOL (BUCHAREST)
BOULENOUAR H;HETRAF S;DJELLOULI H;MEROUFEL D;FODIL F;HAMMANI-MEDJAOUI I;SAIDI M N;HOUTI L;BENCHEKOR S	none	BACKGROUND: CORONARY HEART DISEASE (CHD) IS A MAJOR CAUSE OF MORBIDITY AND MORTALITY OVER THE WORLD; INTERMEDIATE TRAITS ASSOCIATED WITH CHD COMMONLY STUDIED CAN BE INFLUENCED BY A COMBINATION OF GENETIC AND ENVIRONMENTAL FACTORS. OBJECTIVE: WE FOUND PREVIOUSLY SIGNIFICANT ASSOCIATION BETWEEN THREE GENETIC POLYMORPHISMS, AND THE LIPID PROFILE VARIATIONS IN THE ALGERIAN POPULATION. CONSIDERING THE…	LABORATOIRE DE RECHERCHE CANCER LAB N°30, FACULTÉ DE MÉDECINE « DR BENZERDJEB BENAOUDA », UNIVERSITÉ ABOUBEKR BELKAID, TLEMCEN, 13000, ALGERIA; DÉPARTEMENT DE MÉDECINE, FACULTÉ DE MÉDECINE « DR BENZERDJEB BENAOUDA », UNIVERSITÉ ABOUBEKR BELKAID, TLEMCEN, 13000, ALGERIA; LABORATOIRE DE GÉNÉTIQUE MOLÉCULAIRE ET CELLULAIRE, UNIVERSITÉ DES SCIENCES ET DE LA TECHNOLOGIE D’ORAN-MOHAMED BOUDIAF, ORAN, 3…	ALGERIAN POPULATION; CHD RISK; GENETICS; HIGH BLOOD PRESSURE; OBESITY	10.4314/ahs.v20i2.25	ARTICLE	ADULT; ALGERIA; ALLELES; CASE-CONTROL STUDIES; CORONARY DISEASE; CROSS-SECTIONAL STUDIES; FEMALE; GENE FREQUENCY; GENETIC PREDISPOSITION TO DISEASE; GENOTYPE; HUMANS; HYPERTENSION; MALE; MIDDLE AGED; OBESITY; POLYMORPHISM; GENETIC; POLYMORPHISM; SINGLE NUCLEOTIDE; RISK FACTORS; APOLIPOPROTEIN E; GLUCOSE; HIGH DENSITY LIPOPROTEIN CHOLESTEROL; LOW DENSITY LIPOPROTEIN CHOLESTEROL; TRIACYLGLYCEROL; A…	AFR HEALTH SCI	AFR. HEALTH SCI.	ENGLISH	MAKERERE UNIVERSITY, MEDICAL SCHOOL	2020	H. BOULENOUAR; LABORATOIRE DE RECHERCHE CANCER LAB N°30, FACULTÉ DE MÉDECINE « DR BENZERDJEB BENAOUDA », UNIVERSITÉ ABOUBEKR BELKAID, TLEMCEN, 13000, ALGERIA; EMAIL: BOULENOUAR.HOUSSAM@GMAIL.COM; H. BOULENOUAR; DÉPARTEMENT DE MÉDECINE, FACULTÉ DE MÉDECINE « DR BENZERDJEB BENAOUDA », UNIVERSITÉ ABOUBEKR BELKAID, TLEMCEN, 13000, ALGERIA; EMAIL: BOULENOUAR.HOUSSAM@GMAIL.COM; H. BOULENOUAR; LABORATOI…	16806905	AFRICAN HEALTH SCIENCES	0	LACK OF ASSOCIATION BETWEEN GENETIC VARIANTS IN THE 19Q1332 REGION AND CHD RISK IN THE ALGERIAN POPULATION A POPULATIONBASED NESTED CASECONTROL STUDY	20	ISI	TLEMCEN;UNIVERSITÉ ABOUBEKR BELKAID;UNIVERSITÉ DES SCIENCES ET DE LA TECHNOLOGIE D’ORAN-MOHAMED BOUDIAF;CLINIQUE SPÉCIALISÉE EN ORTHOPÉDIE ET RÉÉDUCATION DES VICTIMES DES ACCIDENTS DE TRAVAIL;FACULTÉ DE MÉDECINE;FACULTÉ DES SCIENCES DE LA NATURE ET DE LA VIE	NOTREPORTED;UNIVERSITÉ ABOUBEKR BELKAID;NOTREPORTED;NOTREPORTED;UNIVERSITÉ ABOUBEKR BELKAID;NOTREPORTED;NOTREPORTED;UNIVERSITÉ DES SCIENCES ET DE LA TECHNOLOGIE D’ORAN-MOHAMED BOUDIAF;NOTREPORTED		BOULENOUAR H, 2020, AFR HEALTH SCI	BOULENOUAR H, 2020, AFR HEALTH SCI
BRAUN J;MÄRZ W;WINKELMANN B;DONNER H;HENNING U K;BADENHOOP K	none	BACKGROUND - HYPERINSULINAEMIA AND DYSLIPOPROTEINAEMIA ARE MARKERS AND RISK FACTORS FOR CORONARY ARTERY DISEASE (CAD) AND NON-INSULIN-DEPENDENT DIABETES MELLITUS (NIDDM). WE INVESTIGATED THE INFLUENCE OF A TUMOUR NECROSIS FACTOR Β (TNF-Β) GENE POLYMORPHISM ON SERUM PARAMETERS RELATED TO THESE METABOLIC DISORDERS IN PATIENTS WITH CAD. METHODS - A TOTAL OF 199 PATIENTS WITH CAD AND 81 CONTROL SUBJE…	KLIN. DER J. W. GOETHE-UNIV., FRANKFURT AM MAIN, GERMANY; KLIN. ALBERT-LUDWIGS-UNIV. FREIBURG, FREIBURG, GERMANY; MEDIZINISCHE KLINIK B, LUDWIGSHAFEN, GERMANY; MEDIZINISCHE KLINIK I, ZENTRUM DER INNEREN MEDIZIN, KLIN. DER J. W. GOETHE-UNIV., FRANKFURT AM MAIN, GERMANY; KLIN. ALBERT-LUDWIGS-UNIV. FREIBURG, ABTEILUNG MEDIZINI-9, KLINISCHE CHEMIE, FREIBURG, GERMANY; KLIN. STADT LUDWIGSHAFEN AM RHEIN…	CORONARY ARTERY DISEASE; GENE POLYMORPHISM; HYPERINSULINAEMIA; NON-INSULIN-DEPENDENT DIABETES; TUMOUR NECROSIS FACTOR	10.1046/j.1365-2362.1998.00334.x	ARTICLE	ALLELES; C-PEPTIDE; CORONARY DISEASE; GENE FREQUENCY; GLUCOSE TOLERANCE TEST; HEART VALVE DISEASES; HETEROZYGOTE; HOMOZYGOTE; HUMANS; HYPERINSULINISM; INSULIN; LYMPHOTOXIN-ALPHA; MALE; MIDDLE AGED; POLYMORPHISM; GENETIC; C PEPTIDE; INSULIN; LYMPHOTOXIN; ALLELE; ARTICLE; CONTROLLED STUDY; CORONARY ARTERY DISEASE; DNA POLYMORPHISM; HETEROZYGOSITY; HOMOZYGOSITY; HUMAN; HYPERINSULINEMIA; INSULIN BLOO…	EUR J CLIN INVEST	EUR. J. CLIN. INVEST.	ENGLISH		1998	K. BADENHOOP; KLINIKUM J.W. GOETHE-UNIVERSITAT, 60590 FRANKFURT, THEODOR-STERN-KAI 7, GERMANY; EMAIL: BADENHOOP@EM.UNI-FRANKFURT.DE	00142972	EUROPEAN JOURNAL OF CLINICAL INVESTIGATION	21	TUMOUR NECROSIS FACTOR ALLELES AND HYPERINSULINAEMIA IN CORONARY ARTERY DISEASE	28	ISI	KLIN. DER J. W. GOETHE-UNIV.;KLIN. ALBERT-LUDWIGS-UNIV. FREIBURG;MEDIZINISCHE KLINIK B;KLIN. DER J. W. GOETHE-UNIV.;KLIN. ALBERT-LUDWIGS-UNIV. FREIBURG;MEDIZINISCHE KLINIK B;KLIN. DER J. W. GOETHE-UNIV.	NOTREPORTED;KLINIKUM J.W. GOETHE-UNIVERSITAT;NOTREPORTED		BRAUN J, 1998, EUR J CLIN INVEST	BRAUN J, 1998, EUR J CLIN INVEST
BUCHS A;KORNBERG A;ZAHAVI M;AHARONI D;ZARFATI C;RAPOPORT M	none	THE AIM OF THE STUDY WAS TO DETERMINE THE CORRELATION BETWEEN THE EXPRESSION OF TISSUE FACTOR (TF) AND THE RECEPTOR FOR ADVANCED GLYCATION END PRODUCTS (RAGES) AND VASCULAR COMPLICATIONS IN PATIENTS WITH LONGSTANDING UNCONTROLLED TYPE 2 DIABETES (T2D). TF AND RAGE MRNAS AS WELL AS TF ANTIGEN AND ACTIVITY WERE INVESTIGATED IN 21 T2D PATIENTS WITH AND WITHOUT VASCULAR COMPLICATIONS. MRNA EXPRESSION…	DIABETES UNIT, DEPARTMENT OF INTERNAL MEDICINE C, ASSAF HAROFEH MEDICAL CENTER, ZERIFIN 70300, ISRAEL; INSTITUTE OF HEMATOLOGY, ASSAF HAROFEH MEDICAL CENTER, ZERIFIN 70300, ISRAEL	COMPLICATIONS; RAGE; TISSUE FACTOR; TYPE 2 DIABETES	10.1080/15438600490424325	ARTICLE	CORONARY DISEASE; DIABETES MELLITUS; TYPE 2; DIABETIC ANGIOPATHIES; GENE EXPRESSION REGULATION; HUMANS; LEUKOCYTES; MONONUCLEAR; MIDDLE AGED; PERIPHERAL VASCULAR DISEASES; RECEPTORS; IMMUNOLOGIC; RNA; MESSENGER; THROMBOPLASTIN; TRANSCRIPTION; GENETIC; ADVANCED GLYCATION END PRODUCT; ADVANCED GLYCATION END PRODUCT RECEPTOR; ALBUMIN; HYDROXYMETHYLGLUTARYL COENZYME A REDUCTASE INHIBITOR; INSULIN; ME…	EXP DIABESITY RES	EXP. DIABESITY RES.	ENGLISH		2004	A.E. BUCHS; DEPARTMENT OF INTERNAL MEDICINE C, ASSAF HAROFEH MEDICAL CENTER, ZERIFIN 70300, ISRAEL; EMAIL: ABUCHS@NETVISION.NET.IL	15438600	EXPERIMENTAL DIABESITY RESEARCH	17	INCREASED EXPRESSION OF TISSUE FACTOR AND RECEPTOR FOR ADVANCED GLYCATION END PRODUCTS IN PERIPHERAL BLOOD MONONUCLEAR CELLS OF PATIENTS WITH TYPE 2 DIABETES MELLITUS WITH VASCULAR COMPLICATIONS	5	ISI	ASSAF HAROFEH MEDICAL CENTER;INSTITUTE OF HEMATOLOGY	NOTREPORTED;ASSAF HAROFEH MEDICAL CENTER;NOTREPORTED		BUCHS AE, 2004, EXP DIABESITY RES	BUCHS AE, 2004, EXP DIABESITY RES
BURACZYSKA M;DZIDA G;PUZNIAK A;SOBSTYL J;HANZLIK J	none	BACKGROUND: HUMAN ESSENTIAL HYPERTENSION IS A COMPLEX POLYGENIC DISEASE AFFECTING ABOUT 20% OF THE ADULT POPULATION. THE COMPLEX ETIOLOGY OF THIS DISEASE INVOLVES GENETIC AS WELL AS ENVIRONMENTAL FACTORS. THERE ARE SEVERAL OBSERVATIONS SUPPORTING THE ROLE OF THE INSULIN RECEPTOR (INSR), ATRIAL NATRIURETIC PEPTIDE (ANP), AND METHYLENETETRAHYDROFOLATE REDUCTASE (MTHFR) GENES IN ESSENTIAL HYPERTENSI…	DEPARTMENT OF INTERNAL DISEASES, MEDICAL SCHOOL IN LUBLIN, 20-081 LUBLIN, UL. STASZICA 16, POLAND	ESSENTIAL HYPERTENSION; GENE POLYMORPHISM		ARTICLE	5;10 METHYLENETETRAHYDROFOLATE REDUCTASE (FADH2); ATRIAL NATRIURETIC FACTOR; INSULIN RECEPTOR; ADULT; AGED; ARTICLE; CONTROLLED STUDY; ESSENTIAL HYPERTENSION; FEMALE; GENE FREQUENCY; GENETIC POLYMORPHISM; GENETIC SUSCEPTIBILITY; HUMAN; MAJOR CLINICAL STUDY; MALE; RISK FACTOR	KARDIOL POL	KARDIOL. POL.	ENGLISH	KLINIKA KARDIOLOGII CMKP	1999		00229032	KARDIOLOGIA POLSKA	1	HUMAN ESSENTIAL HYPERTENSION DNA POLYMORPHISMS OF THE INSULIN RECEPTOR INSR ATRIAL NATRIURETIC PEPTIDE ANP AND METHYLENE TETRAHYDROFOLATE REDUCTASE MTHFR GENES	51	ISI	MEDICAL SCHOOL IN LUBLIN	MEDICAL SCHOOL IN LUBLIN		BURACZYSKA M, 1999, KARDIOL POL	BURACZYSKA M, 1999, KARDIOL POL
CAHILL L;LEVY A;CHIUVE S;JENSEN M;WANG H;SHARA N;BLUM S;HOWARD B;PAI J;MUKAMAL K;REXRODE K;RIMM E	none	OBJECTIVES: THIS STUDY SOUGHT TO INVESTIGATE INTO THE BIOLOGICALLY PLAUSIBLE INTERACTION BETWEEN THE COMMON HAPTOGLOBIN (HP) POLYMORPHISM RS#72294371 AND GLYCOSYLATED HEMOGLOBIN (HBA1C) ON RISK OF CORONARY HEART DISEASE (CHD). BACKGROUND: STUDIES OF THE ASSOCIATION BETWEEN THE HP POLYMORPHISM AND CHD REPORT INCONSISTENT RESULTS. INDIVIDUALS WITH THE HP2-2 GENOTYPE PRODUCE HP PROTEINS WITH AN IMPA…	DEPARTMENT OF NUTRITION, HARVARD SCHOOL OF PUBLIC HEALTH, BUILDING II, BOSTON, MA 02115, 655 HUNTINGTON AVENUE, UNITED STATES; RAPPAPORT FACULTY OF MEDICINE, TECHNION ISRAEL INSTITUTE OF TECHNOLOGY, HAIFA, ISRAEL; DEPARTMENT OF MEDICINE, BRIGHAM AND WOMEN'S HOSPITAL, HARVARD MEDICAL SCHOOL, BOSTON, MA, UNITED STATES; MEDSTAR HEALTH RESEARCH INSTITUTE, GEORGETOWN-HOWARD UNIVERSITIES CENTER FOR CLI…	ACUTE MYOCARDIAL INFARCTION; CORONARY DISEASE; EPIDEMIOLOGY; GENETIC ASSOCIATION; GENOTYPE; GLYCOPROTEINS	10.1016/j.jacc.2012.09.063	ARTICLE	ADULT; AGED; AGED; 80 AND OVER; BIOLOGICAL MARKERS; CASE-CONTROL STUDIES; COHORT STUDIES; CORONARY DISEASE; FEMALE; GENOTYPE; GLYCOSYLATION; HAPTOGLOBINS; HEMOGLOBIN A; GLYCOSYLATED; HUMANS; MALE; MIDDLE AGED; PROSPECTIVE STUDIES; RISK FACTORS; UP-REGULATION; YOUNG ADULT; ALPHA TOCOPHEROL; HAPTOGLOBIN; HEMOGLOBIN A1C; HIGH DENSITY LIPOPROTEIN CHOLESTEROL; LOW DENSITY LIPOPROTEIN CHOLESTEROL; ORAL…	J AM COLL CARDIOL	J. AM. COLL. CARDIOL.	ENGLISH		2013	L.E. CAHILL; DEPARTMENT OF NUTRITION, HARVARD SCHOOL OF PUBLIC HEALTH, BUILDING II, BOSTON, MA 02115, 655 HUNTINGTON AVENUE, UNITED STATES; EMAIL: LCAHILL@HSPH.HARVARD.EDU	15583597	JOURNAL OF THE AMERICAN COLLEGE OF CARDIOLOGY	68	HAPTOGLOBIN GENOTYPE IS A CONSISTENT MARKER OF CORONARY HEART DISEASE RISK AMONG INDIVIDUALS WITH ELEVATED GLYCOSYLATED HEMOGLOBIN	61	ISI	HARVARD SCHOOL OF PUBLIC HEALTH;TECHNION ISRAEL INSTITUTE OF TECHNOLOGY;HARVARD MEDICAL SCHOOL;GEORGETOWN-HOWARD UNIVERSITIES CENTER FOR CLINICAL AND TRANSLATIONAL SCIENCES;HARVARD SCHOOL OF PUBLIC HEALTH;BETH ISRAEL DEACONESS MEDICAL CENTER	NOTREPORTED;HARVARD SCHOOL OF PUBLIC HEALTH;NOTREPORTED		CAHILL LE, 2013, J AM COLL CARDIOL	CAHILL LE, 2013, J AM COLL CARDIOL
CAIMI G;MONTANA M;FERRARA F;PORRETTO F;MUSSO M;CANINO B;LO P R	none	IN VASCULAR ATHEROSCLEROTIC DISEASE AND IN DIABETES MELLITUS FEW STUDIES HAVE EVALUATED THE POLYMORPHONUCLEAR LEUKOCYTE (PMN) ADHESION MOLECULE PATTERN. IN THIS STUDY WE EXAMINED THE PMN INTEGRIN EXPRESSION AT BASELINE AND AFTER ACTIVATION IN CONTROLS AND TYPE 2 DIABETIC SUBJECTS WITH MACROVASCULAR COMPLICATIONS (MVC). WE ENROLLED 21 SUBJECTS WITH TYPE 2 DIABETES MELLITUS AND MACROVASCULAR COMPLI…	DEPARTMENT OF INTERNAL MEDICINE, CARDIOVASC. AND NEPHROLOGIC DISEASES, UNIVERSITY OF PALERMO, I-90145 PALERMO, VIA LEONARDO DA VINCI 52, ITALY; DEPARTMENT OF ANGIOLOGY, UNIVERSITY OF PALERMO, PALERMO, ITALY; DEPARTMENT OF HEMATOLOGY, UNIVERSITY OF PALERMO, PALERMO, ITALY	ATHEROSCLEROSIS; DIABETES MELLITUS; INTEGRINS; POLYMORPHONUCLEAR LEUKOCYTE	10.1007/s005920300003	ARTICLE	AGED; ANTIGENS; CD11A; ANTIGENS; CD11B; ANTIGENS; CD11C; ANTIGENS; CD18; DIABETES MELLITUS; TYPE 2; DIABETIC ANGIOPATHIES; FEMALE; HUMANS; INTEGRINS; MALE; MIDDLE AGED; NEUTROPHILS; TETRADECANOYLPHORBOL ACETATE; CD11B ANTIGEN; CD18 ANTIGEN; GLYCOPROTEIN P 15095; INTEGRIN; LYMPHOCYTE FUNCTION ASSOCIATED ANTIGEN 1; ADULT; AGED; ANTIGEN EXPRESSION; ARTICLE; ATHEROSCLEROSIS; CEREBROVASCULAR DISEASE; …	ACTA DIABETOL	ACTA DIABETOL.	ENGLISH		2003		09405429	ACTA DIABETOLOGICA	12	POLYMORPHONUCLEAR LEUKOCYTE INTEGRIN PATTERN AT BASELINE AND AFTER ACTIVATION IN TYPE 2 DIABETIC SUBJECTS WITH MACROVASCULAR COMPLICATIONS	40	ISI	UNIVERSITY OF PALERMO;UNIVERSITY OF PALERMO;UNIVERSITY OF PALERMO	UNIVERSITY OF PALERMO;UNIVERSITY OF PALERMO;UNIVERSITY OF PALERMO		CAIMI G, 2003, ACTA DIABETOL	CAIMI G, 2003, ACTA DIABETOL
CHEN K;ZHUANG Z;SHAO C;ZHENG J;ZHOU Q;DONG E;HUANG T;TANG Y	AHMAD OS, 2015, NAT COMMUN, V6, DOI 10.1038/NCOMMS8060;AIKENS RC, 2017, DIABETES, V66, P543, DOI 10.2337/DB16-0868;ALBERTI KGMM, 2009, CIRCULATION, V120, P1640, DOI 10.1161/CIRCULATIONAHA.109.192644;ARAKI A, 2012, GERIATR GERONTOL INT, V12, P18, DOI 10.1111/J.1447-0594.2011.00809.X;BENNETT DA, 2017, HEART, V103, P1400, DOI 10.1136/HEARTJNL-2016-310605;BHATTACHARYYA OK, 2008, CAN MED ASSOC J, V179…	OBJECTIVETHE OBJECTIVE OF THIS STUDY IS TO INVESTIGATE THE ROLES OF CARDIOMETABOLIC FACTORS (INCLUDING BLOOD PRESSURE, BLOOD LIPIDS, THYROID FUNCTION, BODY MASS, AND INSULIN SENSITIVITY) IN MEDIATING THE CAUSAL EFFECT OF TYPE 2 DIABETES (T2DM) ON CARDIOVASCULAR DISEASE (CVD) OUTCOMES. DESIGNTWO-STEP, TWO-SAMPLE MULTIVARIABLE MENDELIAN RANDOMIZATION (MVMR) STUDY. SETTINGINTERNATIONAL GENOME-WIDE A…	CHINESE ACAD MED SCI & PEKING UNION MED COLL, FUWAI HOSP, NATL CTR CARDIOVASC DIS, DEPT CARDIOL,STATE KEY LAB CARDIOVASC DIS, BEIJING, PEOPLES R CHINA.; CHINESE ACAD MED SCI & PEKING UNION MED COLL, GRAD SCH, DEPT CARDIOL, PEKING UNION MED COLL, BEIJING, PEOPLES R CHINA.; PEKING UNIV, SCH PUBL HLTH, DEPT EPIDEMIOL & BIOSTAT, BEIJING, PEOPLES R CHINA.; PEKING UNIV THIRD HOSP, DEPT CARDIOL, BEIJING…	TYPE-2 DIABETES (T2DM); CARDIOVASCULAR DISEASE; BLOOD PRESSURE; TRIGLYCERIDES (TG); MENDELIAN RANDOMIZATION STUDY	10.3389/fcvm.2022.813208	ARTICLE	GENOME-WIDE ASSOCIATION; DENSITY-LIPOPROTEIN CHOLESTEROL; METABOLIC SYNDROME; BLOOD-PRESSURE; RISK-FACTORS; MELLITUS; INSULIN; HYPERTENSION; GLUCOSE; BIAS	FRONT CARDIOVASC MED	FRONT. CARDIOVASC. MED.	ENGLISH	FRONTIERS MEDIA SA	2022	TANG, YD (CORRESPONDING AUTHOR), CHINESE ACAD MED SCI & PEKING UNION MED COLL, FUWAI HOSP, NATL CTR CARDIOVASC DIS, DEPT CARDIOL,STATE KEY LAB CARDIOVASC DIS, BEIJING, PEOPLES R CHINA.; TANG, YD (CORRESPONDING AUTHOR), CHINESE ACAD MED SCI & PEKING UNION MED COLL, GRAD SCH, DEPT CARDIOL, PEKING UNION MED COLL, BEIJING, PEOPLES R CHINA.; TANG, YD (CORRESPONDING AUTHOR), PEKING UNIV THIRD HOSP, DEP…	2297-055X	FRONTIERS IN CARDIOVASCULAR MEDICINE	8	ROLES OF CARDIOMETABOLIC FACTORS IN MEDIATING THE CAUSAL EFFECT OF TYPE 2 DIABETES ON CARDIOVASCULAR DISEASES A TWOSTEP TWOSAMPLE MULTIVARIABLE MENDELIAN RANDOMIZATION STUDY	9	ISI	CHINESE ACADEMY OF MEDICAL SCIENCES - PEKING UNION MEDICAL COLLEGE; PEKING UNION MEDICAL COLLEGE; FU WAI HOSPITAL - CAMS; CHINESE ACADEMY OF MEDICAL SCIENCES - PEKING UNION MEDICAL COLLEGE; PEKING UNION MEDICAL COLLEGE; PEKING UNIVERSITY; PEKING UNIVERSITY; PEKING UNIVERSITY; PEKING UNIVERSITY; PEKING UNIVERSITY; PEKING UNIVERSITY; PEKING UNIVERSITY	CHINESE ACAD MED SCI AND PEKING UNION MED COLL;CHINESE ACAD MED SCI AND PEKING UNION MED COLL;PEKING UNIV THIRD HOSP;PEKING UNIV THIRD HOSP;KEY LAB MOL CARDIOVASC SCI		CHEN K, 2022, FRONT CARDIOVASC MED	CHEN K, 2022, FRONT CARDIOVASC MED
CHEN R;MORRIS B;DONLON T;MASAKI K;WILLCOX D;DAVY P;ALLSOPP R;WILLCOX B	none	FOXO3 IS A PROMINENT LONGEVITY GENE. TO DATE, NO-ONE HAS EXAMINED WHETHER LONGEVITY-ASSOCIATED FOXO3 GENETIC VARIANTS PROTECT AGAINST MORTALITY IN ALL INDIVIDUALS, OR ONLY IN THOSE WITH AGING-RELATED DISEASES. WE THEREFORE TESTED LONGEVITY-ASSOCIATED FOXO3 SINGLE NUCLEOTIDE POLYMORPHISMS IN A HAPLOTYPE BLOCK FOR ASSOCIATION WITH MORTALITY IN 3,584 ELDERLY AMERICAN MEN OF JAPANESE ANCESTRY, 2,512 …	DEPARTMENT OF RESEARCH, KUAKINI MEDICAL CENTER, HONOLULU, 96817, HI, UNITED STATES; DEPARTMENT OF GERIATRIC MEDICINE, JOHN A. BURNS SCHOOL OF MEDICINE, UNIVERSITY OF HAWAII, HONOLULU, 96813, HI, UNITED STATES; SCHOOL OF MEDICAL SCIENCES, UNIVERSITY OF SYDNEY, SYDNEY, NEW SOUTH WALES, AUSTRALIA; DEPARTMENT OF CELL AND MOLECULAR BIOLOGY JOHN A. BURNS SCHOOL OF MEDICINE, UNIVERSITY OF HAWAII, HONOLU…	FOXO3; GENETICS; LONGEVITY; MORTALITY; RESILIENCE	10.18632/aging.202175	ARTICLE	AGE FACTORS; AGED; AGED; 80 AND OVER; ASIAN CONTINENTAL ANCESTRY GROUP; CARDIOMETABOLIC RISK FACTORS; CASE-CONTROL STUDIES; CORONARY DISEASE; DIABETES MELLITUS; TYPE 2; FORKHEAD BOX PROTEIN O3; GENETIC ASSOCIATION STUDIES; GENETIC PREDISPOSITION TO DISEASE; HAWAII; HUMANS; HYPERTENSION; JAPAN; LONGEVITY; LONGITUDINAL STUDIES; MALE; METABOLIC SYNDROME; PHENOTYPE; POLYMORPHISM; SINGLE NUCLEOTIDE; P…	AGING	AGING	ENGLISH	IMPACT JOURNALS LLC	2020	B.J. MORRIS; DEPARTMENT OF RESEARCH, KUAKINI MEDICAL CENTER, HONOLULU, 96817, UNITED STATES; EMAIL: BRIAN.MORRIS@SYDNEY.EDU.AU	19454589	AGING	16	FOXO3 LONGEVITY GENOTYPE MITIGATES THE INCREASED MORTALITY RISK IN MEN WITH A CARDIOMETABOLIC DISEASE	12	ISI	KUAKINI MEDICAL CENTER;UNIVERSITY OF HAWAII;UNIVERSITY OF SYDNEY;UNIVERSITY OF HAWAII;UNIVERSITY OF HAWAII;OKINAWA INTERNATIONAL UNIVERSITY;UNIVERSITY OF HAWAII	NOTREPORTED;KUAKINI MEDICAL CENTER;NOTREPORTED		CHEN R, 2020, AGING	CHEN R, 2020, AGING
CHI S;LAN C;ZHANG S;LIU H;WANG X;CHEN Y;CHEN X;CHEN S;ZHANG W	AL-DAGHRI N, 2005, CARDIOVASC DIABETOL, V4, DOI 10.1186/1475-2840-4-10;ARAMAKI M, 2006, GENET TEST, V10, P244, DOI 10.1089/GTE.2006.10.244;BOKAREWA M, 2005, J IMMUNOL, V174, P5789, DOI 10.4049/JIMMUNOL.174.9.5789;BOUCHARD L, 2004, J ENDOCRINOL INVEST, V27, P1003, DOI 10.1007/BF03345301;BURNETT MS, 2005, ATHEROSCLEROSIS, V182, P241, DOI 10.1016/J.ATHEROSCLEROSIS.2005.02.014;BURNETT MS, 2006, J CLI…	GENETIC VARIATIONS OF THE HUMAN RETN GENE ARE ASSOCIATED WITH METABOLIC PHENOTYPES, INCLUDING OBESITY, INSULIN SENSITIVITY, DIABETES, AND CORONARY HEART DISEASE (CHD). THERE ARE FEW STUDIES OF TWO GENE VARIANTS, -394C>G AND -420C>G, IN CHINESE POPULATION. THIS STUDY INVESTIGATED THE DISTRIBUTION OF RETN GENE, SINGLE NUCLEOTIDE POLYMORPHISMS (SNPS), IN CHINESE HAN POPULATION AND THE ASSOCIATION OF…	FUJIAN MED UNIV, DEPT CELL BIOL & GENET, 88 JIAOTONG RD, FUZHOU 350004, PEOPLES R CHINA.; FUJIAN MED UNIV, CTR NEUROSCI, FUZHOU 350004, PEOPLES R CHINA.; SICHUAN UNIV, W CHINA HOSP, DEPT MED GENET, CHENGDU 610064, PEOPLES R CHINA.; STATE KEY LAB BIOTHERAPY HUMAN DIS, DIV HUMAN MORBID GENOM, CHENGDU, PEOPLES R CHINA.; FUJIAN MED UNIV, UNION HOSP, DEPT HEMATOL, FUZHOU 350004, PEOPLES R CHINA.;	RETN GENE; TYPE 2 DIABETES MELLITUS (T2DM); CORONARY HEART DISEASE (CHD); SINGLE NUCLEOTIDE POLYMORPHISM (SNP); DHPLC	10.1007/s11010-009-0097-2	ARTICLE	PLASMA RESISTIN CONCENTRATIONS; LINKED-IMMUNOSORBENT-ASSAY; INSULIN-RESISTANCE; SERUM RESISTIN; OBESITY; ATHEROSCLEROSIS; EXPRESSION; DISEASE; ADIPONECTIN; MACROPHAGES	MOL CELL BIOCHEM	MOL. CELL. BIOCHEM.	ENGLISH	SPRINGER	2009	LIU, HK (CORRESPONDING AUTHOR), FUJIAN MED UNIV, DEPT CELL BIOL & GENET, 88 JIAOTONG RD, FUZHOU 350004, PEOPLES R CHINA.	0300-8177	MOLECULAR AND CELLULAR BIOCHEMISTRY	16	ASSOCIATION OF394CGTG AND420CGTG POLYMORPHISMS IN THE RETN GENE WITH T2DM AND CHD AND A NEW POTENTIAL SNP MIGHT BE EXIST IN EXON 3 OF RETN GENE IN CHINESE	330	ISI	FUJIAN MEDICAL UNIVERSITY; FUJIAN MEDICAL UNIVERSITY; SICHUAN UNIVERSITY; FUJIAN MEDICAL UNIVERSITY	FUJIAN MED UNIV		CHI SG, 2009, MOL CELL BIOCHEM	CHI SG, 2009, MOL CELL BIOCHEM
CHISTYAKOV D;TURAKULOV R;SCHERBACHEVA L;MAMAEVA G;BALABOLKIN M;NOSIKOV V	none	THE ALLELE AND GENOTYPE FREQUENCY DISTRIBUTIONS OF THE DL 1S2008 TETRANUCLEOTIDE MICROSATELLITE LINKED WITH THE CATALASE (CAT) GENE WERE COMPARED BETWEEN PATIENTS WITH INSULIN-DEPENDENT DIABETES FNELLITUS (IDDM) WITH (N - 72) AND WITHOUT (N = 82) CORONARY HEART DISEASE (CHD), AND BETWEEN IDDM PATIENTS WITH NORMAL ARTERIAL TENSION (N = 82) AND WITH ARTERIAL HYPERTENSION (N = 42). IN TOTAL, EIGHT A…	STATE RESEARCH INSTITUTE OF GENETICS AND SELECTION OF INDUSTRIAL MICROORGANISMS, MOSCOW, 113545, RUSSIAN FEDERATION; ENDOCRINOLOGY RESEARCH CENTER, RUSSIAN ACADEMY OF MEDICAL SCIENCES, MOSCOW, 117036, RUSSIAN FEDERATION			ARTICLE	BASE SEQUENCE; CATALASE; CHROMOSOME MAPPING; DIABETES MELLITUS; TYPE 2; DNA PRIMERS; GENETIC PREDISPOSITION TO DISEASE; GENOTYPE; HUMANS; HYPERTENSION; MOSCOW; MYOCARDIAL ISCHEMIA; POLYMERASE CHAIN REACTION; POLYMORPHISM; GENETIC; CATALASE; PRIMER DNA; ARTICLE; CHROMOSOME MAP; ENZYMOLOGY; GENETIC POLYMORPHISM; GENETIC PREDISPOSITION; GENETICS; GENOTYPE; HEART MUSCLE ISCHEMIA; HUMAN; HYPERTENSION;…	GENETIKA	GENETIKA	ENGLISH		2000		00166758	GENETIKA	2	POLYMORPHISM OF THE D11S2008 LOCUS OF THE CATALASE GENE REGION IN MUSCOVITES WITH INSULINDEPENDENT DIABETES MELLITUS COMPLICATED BY HYPERTENSION AND CORONARY HEART DISEASE	36	ISI	STATE RESEARCH INSTITUTE OF GENETICS AND SELECTION OF INDUSTRIAL MICROORGANISMS;RUSSIAN ACADEMY OF MEDICAL SCIENCES	STATE RESEARCH INSTITUTE OF GENETICS AND SELECTION OF INDUSTRIAL MICROORGANISMS;RUSSIAN ACADEMY OF MEDICAL SCIENCES		CHISTYAKOV DA, 2000, GENETIKA	CHISTYAKOV DA, 2000, GENETIKA
CHUANG L;CHIU K;CHIANG R;LEE K;WU H;LIN B;TAI T	none	AN INSERTION/DELETION (I/D) POLYMORPHISM OF THE ANGIOTENSIN I-CONVERTING ENZYME (ACE) GENE HAS BEEN IDENTIFIED THAT DETERMINES MOST OF THE PLASMA ACE ACTIVITY GENETICALLY. ASSOCIATION OF THE D ALLELE WITH INSULIN SENSITIVITY AND OF THE D/D GENOTYPE WITH CORONARY HEART DISEASE (CHD) HAS BEEN REPORTED IN VARIOUS ETHNIC POPULATIONS. TO STUDY THE ROTE OF THIS GENETIC POLYMORPHISM IN PATIENTS WITH HYP…	DEPARTMENT OF INTERNAL MEDICINE, NATIONAL TAIWAN UNIVERSITY HOSPITAL, TAIPEI, 7, CHUNG-SHAN SOUTH ROAD, TAIWAN		10.1016/S0026-0495(97)90219-5	ARTICLE	DIPEPTIDYL CARBOXYPEPTIDASE; ADULT; AGED; ALLELISM; ANGIOCARDIOGRAPHY; ARTICLE; CONTROLLED STUDY; GENE DELETION; GENE INSERTION; GENETIC POLYMORPHISM; HUMAN; HUMAN CELL; HYPERTENSION; ISCHEMIC HEART DISEASE; MAJOR CLINICAL STUDY; NON INSULIN DEPENDENT DIABETES MELLITUS; ORAL GLUCOSE TOLERANCE TEST; PRIORITY JOURNAL; TAIWAN	METAB CLIN EXP	METAB. CLIN. EXP.	ENGLISH	W.B. SAUNDERS	1997		00260495	METABOLISM: CLINICAL AND EXPERIMENTAL	49	INSERTIONDELETION POLYMORPHISM OF THE ANGIOTENSIN ICONVERTING ENZYME GENE IN PATIENTS WITH HYPERTENSION NONINSULINDEPENDENT DIABETES MELLITUS AND CORONARY HEART DISEASE IN TAIWAN	46	ISI	NATIONAL TAIWAN UNIVERSITY HOSPITAL	NATIONAL TAIWAN UNIVERSITY HOSPITAL		CHUANG LM, 1997, METAB CLIN EXP	CHUANG LM, 1997, METAB CLIN EXP
COLETTA D;SCHNEIDER J;HU S;DYER T;PUPPALA S;FAROOK V;ARYA R;LEHMAN D;BLANGERO J;DEFRONZO R;DUGGIRALA R;JENKINSON C	ALMASY L, 1998, AM J HUM GENET, V62, P1198, DOI 10.1086/301844;AMOS CI, 1994, AM J HUM GENET, V54, P535;BERG AH, 2002, TRENDS ENDOCRIN MET, V13, P84, DOI 10.1016/S1043-2760(01)00524-0;BLANGERO J, 1997, GENET EPIDEMIOL, V14, P959, DOI 10.1002/(SICI)1098-2272(1997)14:6<959::AID-GEPI66>3.0.CO;2-K;BOSSÉ Y, 2004, J LIPID RES, V45, P419, DOI 10.1194/JLR.M300401-JLR200;BROEDL UC, 2006, CARDIOVASC DIABET…	OBJECTIVE-ELEVATED PLASMA TRIGLYCERIDE CONCENTRATION IS A COMPONENT OF THE INSULIN RESISTANCE SYNDROME AND IS COMMONLY ASSOCIATED WITH TYPE 2 DIABETES, OBESITY, AND CORONARY HEART DISEASE. THE GOAL. OF OUR STUDY WAS TO PERFORM A GENOME-WIDE LINKAGE SCAN TO IDENTIFY GENETIC REGIONS THAT INFLUENCE VARIATION IN PLASMA TRIGLYCERIDE LEVELS IN FAMILIES THAT ARE ENRICHED WITH INDIVIDUALS WITH TYPE 2 DIA…	UNIV TEXAS HLTH SCI CTR SAN ANTONIO, DEPT MED, DIV DIABET, SAN ANTONIO, TX 78229 USA.; SW FDN BIOMED RES, SAN ANTONIO, TX 78284 USA.; UNIV TEXAS HLTH SCI CTR SAN ANTONIO, DEPT MED, DIV CLIN EPIDEMIOL, SAN ANTONIO, TX 78229 USA.; S TEXAS VET HLTH CARE SYST, SAN ANTONIO, TX USA.;		10.2337/db08-0491	ARTICLE	SUSCEPTIBILITY LOCUS; INSULIN-RESISTANCE; TYPE-2; ASSOCIATION; TRAITS; ADIPONECTIN; SEGREGATION; CHOLESTEROL; INTEGRATION; PHENOTYPES	DIABETES	DIABETES	ENGLISH	AMER DIABETES ASSOC	2009	COLETTA, DK (CORRESPONDING AUTHOR), UNIV TEXAS HLTH SCI CTR SAN ANTONIO, DEPT MED, DIV DIABET, SAN ANTONIO, TX 78229 USA.	0012-1797	DIABETES	15	GENOMEWIDE LINKAGE SCAN FOR GENES INFLUENCING PLASMA TRIGLYCERIDE LEVELS IN THE VETERANS ADMINISTRATION GENETIC EPIDEMIOLOGY STUDY	58	ISI	UNIVERSITY OF TEXAS SYSTEM; UNIVERSITY OF TEXAS HEALTH SCIENCE CENTER AT SAN ANTONIO; TEXAS BIOMEDICAL RESEARCH INSTITUTE; UNIVERSITY OF TEXAS SYSTEM; UNIVERSITY OF TEXAS HEALTH SCIENCE CENTER AT SAN ANTONIO; US DEPARTMENT OF VETERANS AFFAIRS; VETERANS HEALTH ADMINISTRATION (VHA); AUDIE L. MURPHY MEMORIAL VETERANS HOSPITAL	UNIV TEXAS HLTH SCI CTR SAN ANTONIO		COLETTA DK, 2009, DIABETES	COLETTA DK, 2009, DIABETES
COMUZZIE A;MITCHELL B;COLE S;MARTIN L;HSUEH W;RAINWATER D;ALMASY L;STERNS M;HIXSON J;MACCLUER J;BLANGERO J	ALLISON DB, 1999, AM J HUM GENET, V65, P531, DOI 10.1086/302487;ALLISON DB, 1998, INT J OBESITY, V22, P559, DOI 10.1038/SJ.IJO.0800625;ALMASY L, 1998, AM J HUM GENET, V62, P1198, DOI 10.1086/301844;AMOS CI, 1994, AM J HUM GENET, V54, P535;BLANGERO J, 1997, GENET EPIDEMIOL, V14, P959, DOI 10.1002/(SICI)1098-2272(1997)14:6<959::AID-GEPI66>3.0.CO;2-K;BRUFORD MW, 1993, CURR OPIN GENET DEV, V3, P939, …	RECENT ESTIMATES INDICATE THAT APPROXIMATELY 18% OF THE POPULATION IN THE UNITED STATES CAN BE CONSIDERED OBESE (DEFINED AS A BODY MASS INDEX [BMI] GREATER THAN OR EQUAL TO 30), AND THIS RATE IS EVEN HIGHER AMONG ETHNIC POPULATIONS SUCH AS MEXICAN AMERICANS. THIS FIGURE BECOMES VERY SIGNIFICANT GIVEN THE STRONG EVIDENCE FOR OBESITY AS A MAJOR RISK FACTOR FOR A VARIETY OF CHRONIC DISEASES INCLUDIN…	SW FDN BIOMED RES, DEPT GENET, SAN ANTONIO, TX 78245 USA.; UNIV MARYLAND, SCH MED, DIV DIABET OBES & NUTR, BALTIMORE, MD 21201 USA.; CHILDRENS HOSP, MED CTR, CTR BIOSTAT & EPIDEMIOL, CINCINNATI, OH 45229 USA.; CHILDRENS HOSP, MED CTR, DIV HUMAN GENET, CINCINNATI, OH 45229 USA.; UNIV CALIF SAN FRANCISCO, SCH MED, DEPT MED, SAN FRANCISCO, CA 94105 USA.; UNIV TEXAS, CTR HLTH SCI, DIV CLIN EPIDEMIOL,…	GENOME SCAN; QUANTITATIVE TRAIT LOCI; MINORITY POPULATIONS; COMMON COMPLEX DISEASES	10.1353/hub.2003.0073	ARTICLE	QUANTITATIVE TRAIT LOCUS; BETA-3 ADRENERGIC-RECEPTOR; NON-HISPANIC WHITES; SERUM LEPTIN LEVELS; BODY-MASS INDEX; PIMA-INDIANS; SMOKING INTERACTION; METABOLIC SYNDROME; DIABETES-MELLITUS; LINKAGE ANALYSIS	HUM BIOL	HUM. BIOL.	ENGLISH	WAYNE STATE UNIV PRESS	2003	COMUZZIE, AG (CORRESPONDING AUTHOR), SW FDN BIOMED RES, DEPT GENET, SAN ANTONIO, TX 78245 USA.	0018-7143	HUMAN BIOLOGY	15	THE GENETICS OF OBESITY IN MEXICAN AMERICANS THE EVIDENCE FROM GENOME SCANNING EFFORTS IN THE SAN ANTONIO FAMILY HEART STUDY	75	ISI	TEXAS BIOMEDICAL RESEARCH INSTITUTE; UNIVERSITY SYSTEM OF MARYLAND; UNIVERSITY OF MARYLAND BALTIMORE; CINCINNATI CHILDREN'S HOSPITAL MEDICAL CENTER; CINCINNATI CHILDREN'S HOSPITAL MEDICAL CENTER; UNIVERSITY OF CALIFORNIA SYSTEM; UNIVERSITY OF CALIFORNIA SAN FRANCISCO; UNIVERSITY OF TEXAS SYSTEM; UNIVERSITY OF TEXAS HEALTH SCIENCE CENTER AT SAN ANTONIO; UNIVERSITY OF TEXAS SYSTEM; UNIVERSITY OF TE…	AG (CORRESPONDING AUTHOR)		COMUZZIE AG, 2003, HUM BIOL	COMUZZIE AG, 2003, HUM BIOL
DALE C;FATEMIFAR G;PALMER T;WHITE J;PRIETO-MERINO D;ZABANEH D;ENGMANN J;SHAH T;WONG A;WARREN H;MCLACHLAN S;TROMPET S;MOLDOVAN M;MORRIS R;SOFAT R;KUMARI M;HYPPÖNEN E;JEFFERIS B;GAUNT T;BEN-SHLOMO Y;ZHOU A;GENTRY-MAHARAJ A;RYAN A;DE M R;NOORDAM R;CAULFIELD M;JUKEMA J;WORRALL B;MUNROE P;MENON U;POWER C;KUH D;LAWLOR D;HUMPHRIES S;MOOK-KANAMORI D;SATTAR N;KIVIMAKI M;PRICE J;SMITH G;DUDBRIDGE F;HINGORA…	AFZAL S, 2016, JAMA-J AM MED ASSOC, V315, P1989, DOI 10.1001/JAMA.2016.4666;ANONYMOUS, COMPREHENSIVE R ARCH;ANONYMOUS, POW CALC MEND RAND;ANONYMOUS, COLL STAT;ANONYMOUS, 2013, R LANG ENV STAT COMP;ASCHARD H, 2015, AM J HUM GENET, V96, P329, DOI 10.1016/J.AJHG.2014.12.021;AUNE D, 2016, BMJ-BRIT MED J, V353, DOI 10.1136/BMJ.I2156;BOWDEN J, 2016, GENET EPIDEMIOL, V40, P304, DOI 10.1002/GEPI.21965;BO…	BACKGROUND: THE IMPLICATIONS OF DIFFERENT ADIPOSITY MEASURES ON CARDIOVASCULAR DISEASE ETIOLOGY REMAIN UNCLEAR. IN THIS ARTICLE, WE QUANTIFY AND CONTRAST CAUSAL ASSOCIATIONS OF CENTRAL ADIPOSITY (WAIST-TO-HIP RATIO ADJUSTED FOR BODY MASS INDEX [WHRADJBMI]) AND GENERAL ADIPOSITY (BODY MASS INDEX [BMI]) WITH CARDIOMETABOLIC DISEASE. METHODS: NINETY-SEVEN INDEPENDENT SINGLE-NUCLEOTIDE POLYMORPHISMS …	UCL, UCL INST HLTH INFORMAT, FARR INST HLTH INFORMAT RES, 222 EUSTON RD, LONDON NW1 2DA, ENGLAND.; UNIV LANCASTER, DEPT MATH & STAT, LANCASTER, ENGLAND.; UCL, UCLGENET INST, LONDON, ENGLAND.; UNIV CATOLICA SAN ANTONIO MURCIA, APPL STAT METHODS MED RES GRP, MURCIA, SPAIN.; KINGS COLL LONDON, SOCIAL GENET & DEV PSYCHIAT, LONDON, ENGLAND.; UCL, INST CARDIOVASC SCI, LONDON, ENGLAND.; UCL, MRC UNIT LI…	ADIPOSITY; BODY FAT DISTRIBUTION; BODY MASS INDEX; CORONARY ARTERY DISEASE; MENDELIAN RANDOMIZATION ANALYSIS; STROKE; WAIST-HIP RATIO	10.1161/CIRCULATIONAHA.116.026560	ARTICLE	MASS INDEX; ABDOMINAL ADIPOSITY; INSTRUMENTAL VARIABLES; CARDIOMETABOLIC TRAITS; CARDIOVASCULAR-DISEASE; MYOCARDIAL-INFARCTION; WAIST CIRCUMFERENCE; RISK-FACTORS; MORTALITY; OBESITY	CIRCULATION	CIRCULATION	ENGLISH	LIPPINCOTT WILLIAMS & WILKINS	2017	DALE, CE; CASAS, JP (CORRESPONDING AUTHOR), UCL, UCL INST HLTH INFORMAT, FARR INST HLTH INFORMAT RES, 222 EUSTON RD, LONDON NW1 2DA, ENGLAND.	0009-7322	CIRCULATION	238	CAUSAL ASSOCIATIONS OF ADIPOSITY AND BODY FAT DISTRIBUTION WITH CORONARY HEART DISEASE STROKE SUBTYPES AND TYPE 2 DIABETES MELLITUS A MENDELIAN RANDOMIZATION ANALYSIS	135	ISI	UNIVERSITY OF LONDON; UNIVERSITY COLLEGE LONDON; LANCASTER UNIVERSITY; UNIVERSITY OF LONDON; UNIVERSITY COLLEGE LONDON; UNIVERSIDAD CATOLICA DE MURCIA; UNIVERSITY OF LONDON; KING'S COLLEGE LONDON; UNIVERSITY OF LONDON; UNIVERSITY COLLEGE LONDON; UNIVERSITY OF LONDON; UNIVERSITY COLLEGE LONDON; UNIVERSITY OF LONDON; QUEEN MARY UNIVERSITY LONDON; UNIVERSITY OF LONDON; QUEEN MARY UNIVERSITY LONDON; …	NOTREPORTED;UCL INST HLTH INFORMAT		DALE CE, 2017, CIRCULATION	DALE CE, 2017, CIRCULATION
DARDANO A;LUCCHESI D;GAROFOLO M;GUALDANI E;FALCETTA P;SANCHO B V;FRANCESCONI P;DEL P S;PENNO G	none	AIMS: SIRT1 EXERTS EFFECTS ON AGEING AND LIFESPAN, AS WELL CARDIOVASCULAR (CV) DISEASE RISK. SIRT1 GENE IS VERY POLYMORPH WITH A FEW TAGGING SINGLE NUCLEOTIDE POLYMORPHISMS (SNPS) SO FAR IDENTIFIED. SOME SNPS, INCLUDING RS7896005, WERE ASSOCIATED WITH TYPE 2 DIABETES (T2DM). WE AIMED TO ASCERTAIN WHETHER THIS SNP MAY BE ASSOCIATED WITH CV DISEASE AT BASELINE AS WELL WITH THESE SAME OUTCOMES AND A…	SECTION OF DIABETES AND METABOLIC DISEASE, DEPARTMENT OF CLINICAL AND EXPERIMENTAL MEDICINE, UNIVERSITY OF PISA AND AZIENDA OSPEDALIERO-UNIVERSITARIA PISANA, PISA, ITALY; EPIDEMIOLOGY UNIT, REGIONAL HEALTH AGENCY (ARS) OF TUSCANY, FLORENCE, ITALY	ALL-CAUSE MORTALITY; CARDIOVASCULAR OUTCOMES; OBSERVATIONAL STUDY; SIRT1 GENE; TYPE 2 DIABETES	10.1002/dmrr.3523	ARTICLE	CARDIOVASCULAR DISEASES; DIABETES MELLITUS; TYPE 2; GENE FREQUENCY; GENETIC PREDISPOSITION TO DISEASE; GENOTYPE; HUMANS; POLYMORPHISM; SINGLE NUCLEOTIDE; SIRTUIN 1; 2;4 THIAZOLIDINEDIONE DERIVATIVE; ANTIHYPERTENSIVE AGENT; ANTILIPEMIC AGENT; ANTITHROMBOCYTIC AGENT; INSULIN; METFORMIN; SECRETAGOGUE; SIRTUIN 1; SIRT1 PROTEIN; HUMAN; SIRTUIN 1; ADULT; ALL CAUSE MORTALITY; ARTICLE; CARDIOVASCULAR DIS…	DIABETES METAB RES REV	DIABETES METAB. RES. REV.	ENGLISH	JOHN WILEY AND SONS LTD	2022	S. DEL PRATO; SECTION OF DIABETES AND METABOLIC DISEASE, DEPARTMENT OF CLINICAL AND EXPERIMENTAL MEDICINE, UNIVERSITY OF PISA AND AZIENDA OSPEDALIERO-UNIVERSITARIA PISANA, PISA, ITALY; EMAIL: STEFANO.DELPRATO@UNIPI.IT	15207552	DIABETES/METABOLISM RESEARCH AND REVIEWS	2	SIRT1 RS7896005 POLYMORPHISM AFFECTS MAJOR VASCULAR OUTCOMES NOT ALLCAUSE MORTALITY IN CAUCASIANS WITH TYPE 2 DIABETES A 13YEAR OBSERVATIONAL STUDY	38	ISI	UNIVERSITY OF PISA AND AZIENDA OSPEDALIERO-UNIVERSITARIA PISANA;REGIONAL HEALTH AGENCY (ARS) OF TUSCANY	NOTREPORTED;UNIVERSITY OF PISA AND AZIENDA OSPEDALIERO-UNIVERSITARIA PISANA;NOTREPORTED		DARDANO A, 2022, DIABETES METAB RES REV	DARDANO A, 2022, DIABETES METAB RES REV
DE M J;MANNING A;SHRADER P;MCATEER J;GOEL A;HAMSTEN A;FOX C;FLOREZ J;DUPUIS J;MEIGS J	none	INHIBITION OF THE ENDOCANNABINOID RECEPTOR CB1 IMPROVES INSULIN SENSITIVITY, LOWERS GLYCEMIA, AND SLOWS ATHEROSCLEROSIS. WE ANALYZED WHETHER COMMON VARIANTS IN THE GENE ENCODING CB1, CNR1, ARE ASSOCIATED WITH INSULIN RESISTANCE, RISK OF TYPE 2 DIABETES (T2D) OR CORONARY HEART DISEASE (CHD). WE STUDIED 2,411 PARTICIPANTS OF THE FRAMINGHAM OFFSPRING STUDY (MEAN AGE 60 YEARS, 52% WOMEN) FOR QUANTITA…	GENERAL MEDICINE DIVISION, MASSACHUSETTS GENERAL HOSPITAL, BOSTON, MA, UNITED STATES; HARVARD MEDICAL SCHOOL, BOSTON, MA, UNITED STATES; DEPARTAMENTO DE MEDICINA INTERNA, HOSPITAL GENERAL UNIVERSITARIO GREGORIO MARAÑÓN, MADRID, SPAIN; BOSTON UNIVERSITY SCHOOL OF PUBLIC HEALTH, BOSTON, MA, UNITED STATES; DEPARTMENT OF MEDICINE, CENTER FOR HUMAN GENETIC RESEARCH, MASSACHUSETTS GENERAL HOSPITAL, BOS…		10.1038/oby.2011.135	ARTICLE	AGED; ALLELES; BLOOD GLUCOSE; CASE-CONTROL STUDIES; COHORT STUDIES; CORONARY ARTERY DISEASE; DIABETES MELLITUS; TYPE 2; FEMALE; GENOTYPE; HUMANS; INSULIN; INSULIN RESISTANCE; MALE; MIDDLE AGED; NUTRITION SURVEYS; ODDS RATIO; POLYMORPHISM; SINGLE NUCLEOTIDE; PROPORTIONAL HAZARDS MODELS; QUANTITATIVE TRAIT LOCI; RECEPTOR; CANNABINOID; CB1; RISK FACTORS; GLUCOSE; INSULIN; ADULT; AGE; ARTICLE; BODY M…	OBESITY	OBESITY	ENGLISH		2011	J.B. MEIGS; GENERAL MEDICINE DIVISION, MASSACHUSETTS GENERAL HOSPITAL, BOSTON, MA, UNITED STATES; EMAIL: JMEIGS@PARTNERS.ORG	1930739X	OBESITY	15	VARIANTS AT THE ENDOCANNABINOID RECEPTOR CB1 GENE CNR1 AND INSULIN SENSITIVITY TYPE 2 DIABETES AND CORONARY HEART DISEASE	19	ISI	MASSACHUSETTS GENERAL HOSPITAL;HARVARD MEDICAL SCHOOL;HOSPITAL GENERAL UNIVERSITARIO GREGORIO MARAÑÓN;BOSTON UNIVERSITY SCHOOL OF PUBLIC HEALTH;CENTER FOR HUMAN GENETIC RESEARCH;BROAD INSTITUTE;UNIVERSITY OF OXFORD;KAROLINSKA INSTITUTET;LUNG AND BLOOD INSTITUTE'S FRAMINGHAM HEART STUDY	NOTREPORTED;MASSACHUSETTS GENERAL HOSPITAL;NOTREPORTED		DE MIGUEL-YANES JM, 2011, OBESITY	DE MIGUEL-YANES JM, 2011, OBESITY
DENG X;LIU Y;LUO M;WU J;MA R;WAN Q;WU J	none	TYPE 2 DIABETES MELLITUS (DM2) IS ASSOCIATED WITH CARDIOVASCULAR COMPLICATIONS AND IS CHARACTERIZED BY HIGH LEVELS OF YKL-40, AN INFLAMMATORY GLYCOPROTEIN INVOLVED IN ENDOTHELIAL DYSFUNCTION. WE INVESTIGATED THE PREDICTIVE POTENTIAL OF CIRCULATING MIR- 24 IN CORONARY HEART DISEASES (CHD) DM2 PATIENTS WITH CHD, AND CONTROL SUBJECTS. BLOOD SAMPLES WERE TAKEN FROM 94 SUBJECTS OF BOTH GENDERS, AND DI…	DRUG DISCOVERY RESEARCH CENTER, SOUTHWEST MEDICAL UNIVERSITY, LUZHOU, SICHUAN, CHINA; LABORATORY FOR CARDIOVASCULAR PHARMACOLOGY OF DEPARTMENT OF PHARMACOLOGY, THE SCHOOL OF PHARMACY, SOUTHWEST MEDICAL UNIVERSITY, LUZHOU, SICHUAN, CHINA; DEPARTMENT OF GYNAECOLOGY AND OBSTETRICS, THE AFFILIATED HOSPITAL OF SOUTHWEST MEDICAL UNIVERSITY, LUZHOU, SICHUAN, CHINA; MEDICAL RESEARCH CENTER, THE AFFILIATE…	BIOMARKER; CIRCULATING MIR-24; CORONARY HEART DISEASE; TYPE 2 DIABETES; YKL-40	10.18632/oncotarget.18593	ARTICLE	BIOLOGICAL MARKER; CHITINASE 3 LIKE PROTEIN 1; MICRORNA 24; 3' UNTRANSLATED REGION; ARTICLE; BINDING SITE; CONTROLLED STUDY; DIAGNOSTIC TEST ACCURACY STUDY; FEMALE; GENE EXPRESSION; HUMAN; ISCHEMIC HEART DISEASE; MAJOR CLINICAL STUDY; MALE; NON INSULIN DEPENDENT DIABETES MELLITUS; PREDICTION	ONCOTARGET	ONCOTARGET	ENGLISH	IMPACT JOURNALS LLC	2017	J. WU; DRUG DISCOVERY RESEARCH CENTER, SOUTHWEST MEDICAL UNIVERSITY, LUZHOU, SICHUAN, CHINA; EMAIL: JBWUCN1996@YAHOO.COM	19492553	ONCOTARGET	44	CIRCULATING MIRNA24 AND ITS TARGET YKL40 AS POTENTIAL BIOMARKERS IN PATIENTS WITH CORONARY HEART DISEASE AND TYPE 2 DIABETES MELLITUS	8	ISI	SOUTHWEST MEDICAL UNIVERSITY;SOUTHWEST MEDICAL UNIVERSITY;THE AFFILIATED HOSPITAL OF SOUTHWEST MEDICAL UNIVERSITY;THE AFFILIATED HOSPITAL OF SOUTHWEST MEDICAL UNIVERSITY;CHINESE UNIVERSITY OF HONG KONG;THE AFFILIATED HOSPITAL OF SOUTHWEST MEDICAL UNIVERSITY	NOTREPORTED;SOUTHWEST MEDICAL UNIVERSITY;NOTREPORTED		DENG X, 2017, ONCOTARGET	DENG X, 2017, ONCOTARGET
DING X;ZHAO L;CUI X;QI L;CHEN A;NASOOHI N;RAYGAN F;AGHADAVOD E;AKBARI E;TAGHIZADEH M;MEMARZADEH M;ASEMI Z	none	BACKGROUND: OBSTRUCTIVE SLEEP APNEA (OSA) HAS BEEN REPORTED TO AFFECT CARDIOMETABOLIC DISEASES. HOWEVER, WHETHER SUCH ASSOCIATION IS CAUSAL IS STILL UNKNOWN. HERE, WE ATTEMPT TO EXPLORE THE EFFECT OF OSA ON TYPE 2 DIABETES (T2D), NONALCOHOLIC FATTY LIVER DISEASE (NAFLD) AND CORONARY HEART DISEASE (CHD). METHODS: GENETIC VARIANTS ASSOCIATED WITH OSA WERE REQUESTED FROM A PUBLISHED GENOME-WIDE ASSO…	DEPARTMENT OF OTORHINOLARYNGOLOGY, SHENGJING HOSPITAL AFFILIATED WITH CHINA MEDICAL UNIVERSITY, LIAONING, SHENYANG, CHINA; DEPARTMENT OF OTORHINOLARYNGOLOGY, THE FIRST HOSPITAL OF CHINA MEDICAL UNIVERSITY, LIAONING, SHENYANG, CHINA;DEPARTMENT OF MOLECULAR AND CELLULAR SCIENCES, FACULTY OF ADVANCED SCIENCES AND TECHNOLOGY, PHARMACEUTICAL SCIENCES BRANCH, ISLAMIC AZAD UNIVERSITY (IAUPS), TEHRAN, IR…	CARDIOMETABOLIC DISEASES; CAUSAL INFERENCE; MENDELIAN RANDOMIZATION; OBSTRUCTIVE SLEEP APNEA; TYPE 2 DIABETES;FLAXSEED OIL; GENE EXPRESSION; INFLAMMATION; INSULIN; LIPID; TYPE 2 DIABETES MELLITUS	10.3389/fpsyt.2023.1068756 10.1007/s11745-017-4295-5	ARTICLE ARTICLE	ADULT; ARTICLE; BONFERRONI METHOD; CAUSAL ATTRIBUTION; CLINICAL OUTCOME; CONTROLLED STUDY; DISEASE ASSOCIATION; FEMALE; GENETIC HETEROGENEITY; GENETIC PREDISPOSITION; GENETIC RISK; GENETIC VARIABILITY; GENOME-WIDE ASSOCIATION STUDY; HUMAN; INSTRUMENTAL VARIABLE ANALYSIS; INVERSE VARIANCE WEIGHTED METHOD; ISCHEMIC HEART DISEASE; MAJOR CLINICAL STUDY; MALE; MENDELIAN RANDOMIZATION ANALYSIS; MIDDLE …	FRONT PSYCHIATRY LIPIDS	FRONT. PSYCHIATRY LIPIDS	ENGLISH ENGLISH	FRONTIERS MEDIA S.A. SPRINGER VERLAG	2023	Y. CHEN; DEPARTMENT OF OTORHINOLARYNGOLOGY, SHENGJING HOSPITAL AFFILIATED WITH CHINA MEDICAL UNIVERSITY, SHENYANG, LIAONING, CHINA; EMAIL: DRCHENYU@163.COM Z. ASEMI; RESEARCH CENTER FOR BIOCHEMISTRY AND NUTRITION IN METABOLIC DISEASES, KASHAN UNIVERSITY OF MEDICAL SCIENCES, KASHAN, IRAN; EMAIL: ASEMI_R@YAHOO.COM	16640640 00244201	FRONTIERS IN PSYCHIATRY LIPIDS	1	MENDELIAN RANDOMIZATION REVEALS NO ASSOCIATIONS OF GENETICALLYPREDICTED OBSTRUCTIVE SLEEP APNEA WITH THE RISK OF TYPE 2 DIABETES NONALCOHOLIC FATTY LIVER DISEASE AND CORONARY HEART DISEASE FLAXSEED OIL SUPPLEMENTATION IMPROVE GENE EXPRESSION LEVELS OF PPAR LPA IL1 AND TNF IN TYPE 2 DIABETIC PATIENTS WITH CORONARY HEART DISEASE	14 52	ISI	SHENGJING HOSPITAL AFFILIATED WITH CHINA MEDICAL UNIVERSITY;THE FIRST HOSPITAL OF CHINA MEDICAL UNIVERSITY;ISLAMIC AZAD UNIVERSITY (IAUPS);KASHAN UNIVERSITY OF MEDICAL SCIENCES;KASHAN UNIVERSITY OF MEDICAL SCIENCES;BARIJ MEDICINAL PLANTS RESEARCH CENTER	NOTREPORTED;SHENGJING HOSPITAL AFFILIATED WITH CHINA MEDICAL UNIVERSITY;NOTREPORTED;KASHAN UNIVERSITY OF MEDICAL SCIENCES;NOTREPORTED		DING X, 2023, FRONT PSYCHIATRY LIPIDS	DING X, 2023, FRONT PSYCHIATRY LIPIDS
DING X;ZHAO L;CUI X;QI L;CHEN Y	ANSTEE QM, 2020, J HEPATOL, V73, P505, DOI 10.1016/J.JHEP.2020.04.003;BOREL AL, 2019, NUTRIENTS, V11, DOI 10.3390/NU11112628;BOS MM, 2019, J CLIN MED, V8, DOI 10.3390/JCM8050682;BOTTAZ-BOSSON G, 2023, CHEST, V163, P1279, DOI 10.1016/J.CHEST.2022.11.034;BRADLEY TD, 2009, LANCET, V373, P82, DOI 10.1016/S0140-6736(08)61622-0;BRION MJA, 2013, INT J EPIDEMIOL, V42, P1497, DOI 10.1093/IJE/DYT179;BROUSS…	BACKGROUNDOBSTRUCTIVE SLEEP APNEA (OSA) HAS BEEN REPORTED TO AFFECT CARDIOMETABOLIC DISEASES. HOWEVER, WHETHER SUCH ASSOCIATION IS CAUSAL IS STILL UNKNOWN. HERE, WE ATTEMPT TO EXPLORE THE EFFECT OF OSA ON TYPE 2 DIABETES (T2D), NONALCOHOLIC FATTY LIVER DISEASE (NAFLD) AND CORONARY HEART DISEASE (CHD). METHODSGENETIC VARIANTS ASSOCIATED WITH OSA WERE REQUESTED FROM A PUBLISHED GENOME-WIDE ASSOCIAT…	CHINA MED UNIV, DEPT OTORHINOLARYNGOL, SHENGJING HOSP, SHENYANG, LIAONING, PEOPLES R CHINA.; CHINA MED UNIV, DEPT OTORHINOLARYNGOL, HOSP 1, SHENYANG, LIAONING, PEOPLES R CHINA.;	OBSTRUCTIVE SLEEP APNEA; TYPE 2 DIABETES; CARDIOMETABOLIC DISEASES; MENDELIAN RANDOMIZATION; CAUSAL INFERENCE	10.3389/fpsyt.2023.1068756	ARTICLE	INTERMITTENT HYPOXIA; GLUCOSE-METABOLISM; SEVERITY	FRONT PSYCHIATRY	FRONT. PSYCHIATRY	ENGLISH	FRONTIERS MEDIA SA	2023	CHEN, Y (CORRESPONDING AUTHOR), CHINA MED UNIV, DEPT OTORHINOLARYNGOL, SHENGJING HOSP, SHENYANG, LIAONING, PEOPLES R CHINA.	1664-0640	FRONTIERS IN PSYCHIATRY	1	MENDELIAN RANDOMIZATION REVEALS NO ASSOCIATIONS OF GENETICALLYPREDICTED OBSTRUCTIVE SLEEP APNEA WITH THE RISK OF TYPE 2 DIABETES NONALCOHOLIC FATTY LIVER DISEASE AND CORONARY HEART DISEASE	14	ISI	CHINA MEDICAL UNIVERSITY; CHINA MEDICAL UNIVERSITY	CHINA MED UNIV		DING XX, 2023, FRONT PSYCHIATRY	DING XX, 2023, FRONT PSYCHIATRY
DOMINGOS A;IACIDA E;DE O R;BONINI-DOMINGOS C;BRANDÃO D M C;DE M L	none	BACKGROUND: MOST INDIVIDUALS DIAGNOSED WITH DIABETES MELLITUS (ABOUT 90%) HAVE TYPE 2 DISEASE (T2DM). T2DM IS ASSOCIATED WITH A HIGH GENETIC PREDISPOSITION AND IS CHARACTERIZED BY CHANGES IN THE SECRETION AND ACTION OF INSULIN. THERE HAVE BEEN REPORTS OF INCREASED ACTIVITY OF THE ADENOSINE DEAMINASE ENZYME IN INDIVIDUALS WITH CORONARY HEART DISEASE AND DM. METHODS: WE EVALUATED 162 PATIENTS WITH …	LABORATORY OF HEMOGLOBINS AND GENETICS OF HEMATOLOGICAL DISEASES (LHGDH), DEPARTMENT OF BIOLOGY, INSTITUTO DE BIOCIÊNCIAS, LETRAS E CIÊNCIAS EXATAS (IBILCE), UNIVERSIDADE ESTADUAL PAULISTA 'JÚLIO DE MESQUITA FILHO'-UNESP, SÃO JOSÉ DO RIO PRETO, SP, CEP 15054-000, RUA CRISTÓVÃO COLOMBO 2265, JARDIM NAZARETH, BRAZIL; IMMUNOGENETICS LABORATORY, DEPARTMENT OF MOLECULAR BIOLOGY, FACULDADE DE MEDICINA …	ADENOSINE DEAMINASE ENZYME POLYMORPHISM; RISK OF CARDIOVASCULAR DISEASE; TYPE-2 DIABETES MELLITUS	10.1093/trstmh/tru076	ARTICLE	ADENOSINE DEAMINASE; ADULT; AGED; AGED; 80 AND OVER; BRAZIL; CASE-CONTROL STUDIES; CORONARY ARTERY DISEASE; DIABETES MELLITUS; TYPE 2; FEMALE; GENE FREQUENCY; GENETIC PREDISPOSITION TO DISEASE; GENOTYPE; HUMANS; MALE; MIDDLE AGED; POLYMORPHISM; GENETIC; RISK FACTORS; ADENOSINE DEAMINASE; GENOMIC DNA; HIGH DENSITY LIPOPROTEIN CHOLESTEROL; LOW DENSITY LIPOPROTEIN; TRIACYLGLYCEROL; ADENOSINE DEAMINA…	TRANS R SOC TROP MED HYG	TRANS. R. SOC. TROP. MED. HYG.	ENGLISH	OXFORD UNIVERSITY PRESS	2014	A.C.B. DOMINGOS; LABORATORY OF HEMOGLOBINS AND GENETICS OF HEMATOLOGICAL DISEASES (LHGDH), DEPARTMENT OF BIOLOGY, INSTITUTO DE BIOCIÊNCIAS, LETRAS E CIÊNCIAS EXATAS (IBILCE), UNIVERSIDADE ESTADUAL PAULISTA 'JÚLIO DE MESQUITA FILHO'-UNESP, SÃO JOSÉ DO RIO PRETO, SP, CEP 15054-000, RUA CRISTÓVÃO COLOMBO 2265, JARDIM NAZARETH, BRAZIL; EMAIL: ANACAROLINABONINI@GMAIL.COM	00359203	TRANSACTIONS OF THE ROYAL SOCIETY OF TROPICAL MEDICINE AND HYGIENE	2	TYPE2 DIABETES MELLITUS AND THE FREQUENCY OF THE G22A POLYMORPHISM OF THE ADENOSINE DEAMINASE GENE IN A MIXED POPULATION IN BRAZIL	108	ISI	UNIVERSIDADE ESTADUAL PAULISTA 'JÚLIO DE MESQUITA FILHO'-UNESP;IMMUNOGENETICS LABORATORY	NOTREPORTED;UNIVERSIDADE ESTADUAL PAULISTA 'JÚLIO DE MESQUITA FILHO'-UNESP;NOTREPORTED		DOMINGOS ACB, 2014, TRANS R SOC TROP MED HYG	DOMINGOS ACB, 2014, TRANS R SOC TROP MED HYG
DOMÍNGUEZ-BARRAGÁN J;FERNÁNDEZ-SANÉS A;HERNÁEZ A;LLAURADÓ-PONT J;MARRUGAT J;ROBINSON O;TZOULAKI I;ELOSUA R;LASSALE C	ALEGRA-TORRES JA, 2011, EPIGENOMICS-UK, V3, P267, DOI 10.2217/EPI.11.22, 10.2217/EPI.11.22;ALKERWI A, 2017, CLIN NUTR, V36, P1275, DOI 10.1016/J.CLNU.2016.08.013;ARPÓN A, 2018, NUTRIENTS, V10, DOI 10.3390/NU10010015;ARYEE MJ, 2014, BIOINFORMATICS, V30, P1363, DOI 10.1093/BIOINFORMATICS/BTU049;BAI YJM, 2020, FRONT MOL BIOSCI, V7, DOI 10.3389/FMOLB.2020.00128;BALDUZZI S, 2019, EVID-BASED MENT HEAL,…	AIMS DIET QUALITY MIGHT INFLUENCE CARDIOMETABOLIC HEALTH THROUGH EPIGENETIC CHANGES, BUT THIS HAS BEEN LITTLE INVESTIGATED IN ADULTS. OUR AIMS WERE TO IDENTIFY CYTOSINE-PHOSPHATE-GUANINE (CPG) DINUCLEOTIDES ASSOCIATED WITH DIET QUALITY BY CONDUCTING AN EPIGENOME-WIDE ASSOCIATION STUDY (EWAS) BASED ON BLOOD DNA METHYLATION (DNAM) AND TO ASSESS HOW DIET-RELATED CPGS ASSOCIATE WITH INHERITED SUSCEPT…	HOSP DEL MAR RES INST IMIM, PROGRAMME EPIDEMIOL & PUBL HLTH, DR AIGUADER,88, BARCELONA 08003, SPAIN.; UCL, MRC UNIT LIFELONG HLTH & AGEING, LONDON WC1E 7HB, ENGLAND.; UNIV BRISTOL, BRISTOL MED SCH, POPULAT HLTH SCI, BRISTOL BS8 2BN, ENGLAND.; NORWEGIAN INST PUBL HLTH, CTR FERTIL & HLTH, N-0463 OSLO, NORWAY.; UNIV RAMON LLULL, BLANQUERNA SCH HLTH SCI, BARCELONA 08025, SPAIN.; INST SALUD CARLOS III…	DNA METHYLATION; DIET QUALITY; CARDIOVASCULAR DISEASE; EPIDEMIOLOGY; NUTRITION	10.1093/eurjpc/zwad317	ARTICLE; EARLY ACCESS	EPIGENOME-WIDE ASSOCIATION; HYDROCARBON RECEPTOR REPRESSOR; FOOD-FREQUENCY QUESTIONNAIRE; ADULTS; RISK; ADHERENCE; PACKAGE; DISEASE; OBESITY; LOCI	EUR J PREV CARDIOL	EUR. J. PREV. CARDIOL.	ENGLISH	OXFORD UNIV PRESS	2023	LASSALE, C (CORRESPONDING AUTHOR), HOSP DEL MAR RES INST IMIM, PROGRAMME EPIDEMIOL & PUBL HLTH, DR AIGUADER,88, BARCELONA 08003, SPAIN.; LASSALE, C (CORRESPONDING AUTHOR), INST SALUD CARLOS III, CONSORTIUM BIOMED RES PATHOPHYSIOL OBES & NUTR CIB, MONFORTE LEMOS 3-5, MADRID 08029, SPAIN.; LASSALE, C (CORRESPONDING AUTHOR), BARCELONA INST GLOBAL HLTH ISGLOBAL, DR AIGUADER 88, BARCELONA 08003, SPAIN…	2047-4873	EUROPEAN JOURNAL OF PREVENTIVE CARDIOLOGY	1	BLOOD DNA METHYLATION SIGNATURE OF DIET QUALITY AND ASSOCIATION WITH CARDIOMETABOLIC TRAITS		ISI	HOSPITAL DEL MAR RESEARCH INSTITUTE; HOSPITAL DEL MAR; UNIVERSITY OF LONDON; UNIVERSITY COLLEGE LONDON; UNIVERSITY OF BRISTOL; NORWEGIAN INSTITUTE OF PUBLIC HEALTH (NIPH); UNIVERSITAT RAMON LLULL; INSTITUTO DE SALUD CARLOS III; ISGLOBAL; INSTITUTO DE SALUD CARLOS III; IMPERIAL COLLEGE LONDON; ACADEMY OF ATHENS; IMPERIAL COLLEGE LONDON; UNIVERSITAT DE VIC - UNIVERSITAT CENTRAL DE CATALUNYA (UVIC-U…	HOSP DEL MAR RES INST IMIM;INST SALUD CARLOS III;BARCELONA INST GLOBAL HLTH ISGLOBAL;UNIV POMPEU FABRA UPF		DOMÍNGUEZ-BARRAGÁN J, 2023, EUR J PREV CARDIOL	DOMÍNGUEZ-BARRAGÁN J, 2023, EUR J PREV CARDIOL
DONG C;TANG L;LIU Z;BU S;LIU Q;WANG Q;MAI Y;WANG D;DUAN S	AITKEN C, 2011, SCI JUSTICE, V51, P1, DOI 10.1016/J.SCIJUS.2011.01.002;ANGELAKOPOULOU A, 2012, EUR HEART J, V33, P393, DOI 10.1093/EURHEARTJ/EHR225;ASHBURNER M, 2000, NAT GENET, V25, P25, DOI 10.1038/75556;BACCARELLI A, 2012, CURR OPIN CLIN NUTR, V15, P323, DOI 10.1097/MCO.0B013E328354BF5C;BADER GD, 2001, NUCLEIC ACIDS RES, V29, P242, DOI 10.1093/NAR/29.1.242;BURTON PR, 2007, NATURE, V447, P661, …	TYPE 2 DIABETES (T2D) AND CORONARY ARTERY DISEASE (CAD) ARE CLOSELY RELATED CHRONIC DISEASES WITH HIGH PREVALENCE AND MORBIDITY. HOWEVER, A COMPREHENSIVE COMPARISON OF THE TWO DISEASES IS LACKING. RECENT GENOMEWIDE ASSOCIATION STUDIES (GWAS) HAVE IDENTIFIED A HANDFUL OF SINGLE NUCLEOTIDE POLYMORPHISMS (SNPS) THAT ARE SIGNIFICANTLY ASSOCIATED WITH THE RISK OF T2D AND CAD. THESE MOST SIGNIFICANT FI…	NINGBO UNIV, SCH MED, ZHEJIANG PROV KEY LAB PATHOPHYSIOL, NINGBO 315211, ZHEJIANG, PEOPLES R CHINA.; NINGBO UNIV, SCH MED, CTR DIABET, NINGBO 315211, ZHEJIANG, PEOPLES R CHINA.; NINGBO UNIV, AFFILIATED HOSP, NINGBO 315211, ZHEJIANG, PEOPLES R CHINA.; HUAZHONG UNIV SCI & TECHNOL, TONE MED COLL, TONGJI HOSP, INST HYPERTENS, WUHAN 430074, PEOPLES R CHINA.; HUAZHONG UNIV SCI & TECHNOL, TONE MED COLL,…	TYPE 2 DIABETES; CORONARY ARTERY DISEASE; GENOME-WIDE ASSOCIATION; NETWORK ANALYSIS; PROTEIN-PROTEIN INTERACTION; PATHWAY; HUB	10.1016/j.gene.2014.02.001	ARTICLE	GENOME-WIDE ASSOCIATION; ARTERY-DISEASE; PATHWAY; RISK; POLYMORPHISM; CENTRALITY; MODELS; LIPIDS; TOOL	GENE	GENE	ENGLISH	ELSEVIER	2014	DONG, CZ (CORRESPONDING AUTHOR), NINGBO UNIV, SCH MED, ZHEJIANG PROV KEY LAB PATHOPHYSIOL, NINGBO 315211, ZHEJIANG, PEOPLES R CHINA.	0378-1119	GENE	12	LANDSCAPE OF THE RELATIONSHIP BETWEEN TYPE 2 DIABETES AND CORONARY HEART DISEASE THROUGH AN INTEGRATED GENE NETWORK ANALYSIS	539	ISI	NINGBO UNIVERSITY; NINGBO UNIVERSITY; NINGBO UNIVERSITY; HUAZHONG UNIVERSITY OF SCIENCE AND TECHNOLOGY; HUAZHONG UNIVERSITY OF SCIENCE AND TECHNOLOGY	NINGBO UNIV		DONG CZ, 2014, GENE	DONG CZ, 2014, GENE
DORIA A	ANDRÉS V, 2004, CARDIOVASC RES, V63, P11, DOI 10.1016/J.CARDIORES.2004.02.009;BECKMAN JA, 2002, JAMA-J AM MED ASSOC, V287, P2570, DOI 10.1001/JAMA.287.19.2570;BUSE JB, 2007, AM J CARDIOL, V99, P21I, DOI 10.1016/J.AMJCARD.2007.03.003;CARDIOGRAMPLUSC4D CONSORTIUM, 2013, NAT GENET, V45, P25, DOI 10.1038/NG.2480;DORIA A, 2008, JAMA-J AM MED ASSOC, V300, P2389, DOI 10.1001/JAMA.2008.649;DRUCKER DJ, 20…	THE PAST DECADE HAS WITNESSED AN EXPONENTIAL INCREASE IN OUR ABILITY TO SEARCH THE GENOME FOR GENETIC FACTORS PREDISPOSING TO CARDIOVASCULAR DISEASE (CVD) AND IN PARTICULAR CORONARY HEART DISEASE (CHD). IDENTIFYING THESE GENES COULD LEAD TO THE DEVELOPMENT OF INNOVATIVE STRATEGIES TO PREVENT THE CARDIOVASCULAR COMPLICATIONS OF DIABETES BY ALLOWING US TO 1) CREATE PREDICTIVE ALGORITHMS FOR THE IDE…	JOSLIN DIABET CTR, DIV RES, BOSTON, MA 02215 USA.; HARVARD MED SCH, DEPT MED, BOSTON, MA 02115 USA.; HARVARD TH CHAN SCH PUBL HLTH, DEPT EPIDEMIOL, BOSTON, MA 02115 USA.;		10.2337/dbi18-0036	ARTICLE	CORONARY-ARTERY-DISEASE; INTENSIVE GLYCEMIC CONTROL; HEART-DISEASE; PROSPECTIVE ASSOCIATION; RISK SCORE; LOCI; MORTALITY; MELLITUS; SUSCEPTIBILITY; INDIVIDUALS	DIABETES	DIABETES	ENGLISH	AMER DIABETES ASSOC	2019	DORIA, A (CORRESPONDING AUTHOR), JOSLIN DIABET CTR, DIV RES, BOSTON, MA 02215 USA.; DORIA, A (CORRESPONDING AUTHOR), HARVARD MED SCH, DEPT MED, BOSTON, MA 02115 USA.; DORIA, A (CORRESPONDING AUTHOR), HARVARD TH CHAN SCH PUBL HLTH, DEPT EPIDEMIOL, BOSTON, MA 02115 USA.	0012-1797	DIABETES	3	LEVERAGING GENETICS TO IMPROVE CARDIOVASCULAR HEALTH IN DIABETES THE 2018 EDWIN BIERMAN AWARD LECTURE	68	ISI	HARVARD UNIVERSITY; JOSLIN DIABETES CENTER, INC.; HARVARD UNIVERSITY; HARVARD MEDICAL SCHOOL; HARVARD UNIVERSITY; HARVARD T.H. CHAN SCHOOL OF PUBLIC HEALTH	JOSLIN DIABET CTR;HARVARD MED SCH;HARVARD TH CHAN SCH PUBL HLTH		DORIA A, 2019, DIABETES	DORIA A, 2019, DIABETES
DRZEWOSKI J;ŚLIWIŃSKA A;PRZYBYŁOWSKA K;ŚLIWIŃSKI T;KASZNICKI J;ZURAWSKA-KLIS M;KOSMALSKI M;MAJSTEREK I	none	BACKGROUND AND AIM: DIABETES MELLITUS IS A MAJOR RISK FACTOR FOR CORONARY HEART DISEASE (CHD). MATRIX METALLOPROTEINASES (MMPS) CAN PLAY A PIVOTAL ROLE IN THE REMODELLING OF EXTRACELLULAR MATRIX ASSOCIATED WITH THE DEVELOPMENT OF ATHEROSCLEROSIS. THEREFORE, THE AIM OF THE STUDY WAS TO COMPARE THE DISTRIBUTION OF GENOTYPES AND FREQUENCY OF ALLELES OF TWO POLYMORPHISMS OF THE MMP-1 GENE PROMOTER, A…	MEDICAL UNIVERSITY, LODZ, POLAND; UNIVERSITY OF LODZ, POLAND; MEDICAL UNIVERSITY, 90-419 ŁÓDŹ, AL. KOŚCIUSZKI 4, POLAND	CORONARY HEART DISEASE; GENETIC POLYMORPHISM; METALLOPROTEINASES; TYPE 2 DIABETES MELLITUS		ARTICLE	INTERSTITIAL COLLAGENASE; ADULT; AGED; ARTICLE; CONTROLLED STUDY; DIABETIC PATIENT; DNA POLYMORPHISM; ENZYME BLOOD LEVEL; FEMALE; GENE FREQUENCY; GENOTYPE; GLUCOSE METABOLISM; HUMAN; ISCHEMIC HEART DISEASE; MAJOR CLINICAL STUDY; MALE; NON INSULIN DEPENDENT DIABETES MELLITUS; POLYMERASE CHAIN REACTION; PROMOTER REGION; RESTRICTION FRAGMENT LENGTH POLYMORPHISM	KARDIOL POL	KARDIOL. POL.	ENGLISH	VIA MEDICA	2008	J. DRZEWOSKI; MEDICAL UNIVERSITY, 90-419 ŁÓDŹ, AL. KOŚCIUSZKI 4, POLAND; EMAIL: JDRZEW@POCZTA.ONET.PL	00229032	KARDIOLOGIA POLSKA	14	GENE POLYMORPHISMS AND ANTIGEN LEVELS OF MATRIX METALLOPROTEINASE1 IN TYPE 2 DIABETES MELLITUS COEXISTING WITH CORONARY HEART DISEASE	66	ISI	MEDICAL UNIVERSITY;UNIVERSITY OF LODZ;MEDICAL UNIVERSITY	NOTREPORTED;MEDICAL UNIVERSITY;NOTREPORTED		DRZEWOSKI J, 2008, KARDIOL POL	DRZEWOSKI J, 2008, KARDIOL POL
DUNGAN J;QIN X;HORNE B;CARLQUIST J;SINGH A;HURDLE M;GRASS E;HAYNES C;GREGORY S;SHAH S;HAUSER E;KRAUS W	none	SURVIVAL BIAS MAY UNDULY IMPACT GENETIC ASSOCIATION WITH COMPLEX DISEASES; GENE-SPECIFIC SURVIVAL EFFECTS MAY FURTHER COMPLICATE SUCH INVESTIGATIONS. CORONARY ARTERY DISEASE (CAD) IS A COMPLEX PHENOTYPE FOR WHICH LITTLE IS UNDERSTOOD ABOUT GENE-SPECIFIC SURVIVAL EFFECTS; YET, SUCH INFORMATION CAN OFFER INSIGHT INTO REFINING GENETIC ASSOCIATIONS, IMPROVING REPLICATIONS, AND CAN PROVIDE CANDIDATE G…	DUKE UNIVERSITY, SCHOOL OF NURSING, DURHAM, NC, UNITED STATES; DUKE UNIVERSITY, DEPARTMENT OF MEDICINE, DURHAM, NC, UNITED STATES; INTERMOUNTAIN HEART INSTITUTE, INTERMOUNTAIN MEDICAL CENTER, SALT LAKE CITY, UT, UNITED STATES; DEPARTMENT OF INTERNAL MEDICINE, UNIVERSITY OF UTAH, SALT LAKE CITY, UT, UNITED STATES; BEHAVIORAL MEDICINE RESEARCH CENTER, DUKE UNIVERSITY, MEDICAL CENTER, DURHAM, NC, UN…		10.1371/journal.pone.0154856	ARTICLE	ADOLESCENT; ADULT; AGED; AGED; 80 AND OVER; CHILD; COMORBIDITY; CORONARY ARTERY DISEASE; FEMALE; FOLLOW-UP STUDIES; GENETIC VARIATION; GENOTYPE; HUMANS; KAPLAN-MEIER ESTIMATE; MALE; MIDDLE AGED; POLYMORPHISM; SINGLE NUCLEOTIDE; PROPORTIONAL HAZARDS MODELS; RISK FACTORS; SEVERITY OF ILLNESS INDEX; SEX FACTORS; SURVIVAL ANALYSIS; YOUNG ADULT; ADULT; AGE; ALL CAUSE MORTALITY; ARTICLE; BODY MASS; CAU…	PLOS ONE	PLOS ONE	ENGLISH	PUBLIC LIBRARY OF SCIENCE	2016		19326203	PLOS ONE	6	CASEONLY SURVIVAL ANALYSIS REVEALS UNIQUE EFFECTS OF GENOTYPE SEX AND CORONARY DISEASE SEVERITY ON SURVIVORSHIP	11	ISI	DUKE UNIVERSITY;DUKE UNIVERSITY;INTERMOUNTAIN HEART INSTITUTE;UNIVERSITY OF UTAH;DUKE UNIVERSITY;DUKE UNIVERSITY;DUKE UNIVERSITY	DUKE UNIVERSITY;DUKE UNIVERSITY;INTERMOUNTAIN HEART INSTITUTE;UNIVERSITY OF UTAH;DUKE UNIVERSITY;DUKE UNIVERSITY;DUKE UNIVERSITY		DUNGAN JR, 2016, PLOS ONE	DUNGAN JR, 2016, PLOS ONE
DURLACH A;CLAVEL C;GIRARD-GLOBA A;DURLACH V	none	CHOLESTEROL ESTER TRANSFER PROTEIN (CETP) IS A KEY REGULATING FACTOR OF LIPID METABOLISM, AND THE POLYMORPHISM OF ITS GENE MAY BE A CANDIDATE FOR MODULATING THE LIPID PARAMETERS IN TYPE 2 DIABETIC SUBJECTS. IN A GROUP OF 406 TYPE 2 DIABETIC PATIENTS AGED 59.5 ± 10.8 Y, WITH A BODY MASS INDEX OF 28.9 ± 5.3 KG/M2 AND HBA1C = 8.2 ± 1.9%, WE STUDIED THE B POLYMORPHISM AT THE CETP LOCUS DETECTABLE WIT…	INSTITUT POL BOUIN, HÔPITAL MAISON BLANCHE, CENTRE HOSPITALO-UNIVERSITAIRE, 51092 REIMS, FRANCE; LABORATOIRE DE MÉTABOLISME DES LIPIDES, HÔPITAL DE L'ANTIQUAILLE, CNRS UPRESA 5014, 69005 LYON, FRANCE; SERVICE D'ENDOCRINOLOGIE, MALADIES MÉTABOLIQUE ET DE MÉDECINE INTERNE, HÔPITAL ROBERT DEBRÉ, CENTRE HOSPITALO-UNIVERSITAIRE, 51092 REIMS, FRANCE		10.1210/jcem.84.10.6064	ARTICLE	CHOLESTEROL ESTER TRANSFER PROTEIN; HIGH DENSITY LIPOPROTEIN CHOLESTEROL; ADULT; AGED; ARTICLE; CARDIOVASCULAR RISK; CHOLESTEROL TRANSPORT; CONTROLLED STUDY; CORONARY RISK; FEMALE; GENE LOCUS; GENETIC POLYMORPHISM; GENETIC RISK; HUMAN; MAJOR CLINICAL STUDY; MALE; NON INSULIN DEPENDENT DIABETES MELLITUS; PRIORITY JOURNAL	J CLIN ENDOCRINOL METAB	J. CLIN. ENDOCRINOL. METAB.	ENGLISH	ENDOCRINE SOCIETY	1999		0021972X	JOURNAL OF CLINICAL ENDOCRINOLOGY AND METABOLISM	45	SEXDEPENDENT ASSOCIATION OF A GENETIC POLYMORPHISM OF CHOLESTERYL ESTER TRANSFER PROTEIN WITH HIGHDENSITY LIPOPROTEIN CHOLESTEROL AND MACROVASCULAR PATHOLOGY IN TYPE II DIABETIC PATIENTS	84	ISI	CENTRE HOSPITALO-UNIVERSITAIRE;LABORATOIRE DE MÉTABOLISME DES LIPIDES;CENTRE HOSPITALO-UNIVERSITAIRE	CENTRE HOSPITALO-UNIVERSITAIRE;LABORATOIRE DE MÉTABOLISME DES LIPIDES;CENTRE HOSPITALO-UNIVERSITAIRE		DURLACH A, 1999, J CLIN ENDOCRINOL METAB	DURLACH A, 1999, J CLIN ENDOCRINOL METAB
EMDIN C;KHERA A;NATARAJAN P;KLARIN D;ZEKAVAT S;HSIAO A;KATHIRESAN S	ASHWELL M, 1985, BRIT MED J, V290, P1692, DOI 10.1136/BMJ.290.6483.1692;BARRETTCONNOR E, 1997, CIRCULATION, V95, P252, DOI 10.1161/01.CIR.95.1.252;BOWDEN J, 2016, GENET EPIDEMIOL, V40, P304, DOI 10.1002/GEPI.21965;BURGESS S, 2014, EPIDEMIOLOGY, V25, P877, DOI 10.1097/EDE.0000000000000161;BURGESS S, 2013, GENET EPIDEMIOL, V37, P658, DOI 10.1002/GEPI.21758;DESPRÉS JP, 2012, CIRCULATION, V126, P1301…	IMPORTANCE IN OBSERVATIONAL STUDIES, ABDOMINAL ADIPOSITY HAS BEEN ASSOCIATED WITH TYPE 2 DIABETES AND CORONARY HEART DISEASE (CHD). WHETHER THESE ASSOCIATIONS REPRESENT CAUSAL RELATIONSHIPS REMAINS UNCERTAIN. OBJECTIVE TO TEST THE ASSOCIATION OF A POLYGENIC RISK SCORE FOR WAIST-TO-HIP RATIO (WHR) ADJUSTED FOR BODY MASS INDEX (BMI), A MEASURE OF ABDOMINAL ADIPOSITY, WITH TYPE 2 DIABETES AND CHD TH…	HARVARD MED SCH, MASSACHUSETTS GEN HOSP, CTR GENOM MED, BOSTON, MA USA.; HARVARD MED SCH, MASSACHUSETTS GEN HOSP, DIV CARDIOL, BOSTON, MA USA.; BROAD INST, PROGRAM MED & POPULAT GENET, CAMBRIDGE, MA USA.; MIT, DEPT ECON, 77 MASSACHUSETTS AVE, CAMBRIDGE, MA 02139 USA.;		10.1001/jama.2016.21042	ARTICLE	BODY-MASS INDEX; GENOME-WIDE ASSOCIATION; MENDELIAN RANDOMIZATION; LARGE-SCALE; CARDIOVASCULAR-DISEASE; COMPUTED-TOMOGRAPHY; BIOLOGICAL PATHWAYS; FAT DISTRIBUTION; ARTERY-DISEASE; RISK	JAMA-J AM MED ASSOC	JAMA-J. AM. MED. ASSOC.	ENGLISH	AMER MEDICAL ASSOC	2017	KATHIRESAN, S (CORRESPONDING AUTHOR), MASSACHUSETTS GEN HOSP, CTR GENOM MED, 185 CAMBRIDGE ST,CPZN 5-830, BOSTON, MA 02114 USA.	0098-7484	JAMA-JOURNAL OF THE AMERICAN MEDICAL ASSOCIATION	244	GENETIC ASSOCIATION OF WAISTTOHIP RATIO WITH CARDIOMETABOLIC TRAITS TYPE 2 DIABETES AND CORONARY HEART DISEASE	317	ISI	HARVARD UNIVERSITY; MASSACHUSETTS GENERAL HOSPITAL; HARVARD MEDICAL SCHOOL; HARVARD UNIVERSITY; HARVARD MEDICAL SCHOOL; MASSACHUSETTS GENERAL HOSPITAL; HARVARD UNIVERSITY; MASSACHUSETTS INSTITUTE OF TECHNOLOGY (MIT); BROAD INSTITUTE; MASSACHUSETTS INSTITUTE OF TECHNOLOGY (MIT)	CTR GENOM MED		EMDIN CA, 2017, JAMA-J AM MED ASSOC	EMDIN CA, 2017, JAMA-J AM MED ASSOC
EMDIN C;KLARIN D;NATARAJAN P;FLOREZ J;KATHIRESAN S;KHERA A	AHMAD OS, 2015, NAT COMMUN, V6, DOI 10.1038/NCOMMS8060;AMERICAN DIABETES ASSOCIATION, 2017, DIABETES CARE, V40, PS64;EMDIN CA, 2017, JAMA-J AM MED ASSOC, V317, P626, DOI 10.1001/JAMA.2016.21042;EMDIN CA, 2016, J AM COLL CARDIOL, V68, P2761, DOI 10.1016/J.JACC.2016.10.033;FATEHI M, 2012, DIABETES, V61, P241, DOI 10.2337/DB11-0371;FERENCE BA, 2016, NEW ENGL J MED, V375, P2144, DOI 10.1056/NEJMOA160…	DESPITE WIDESPREAD CLINICAL USE IN THE TREATMENT OF TYPE 2 DIABETES, THE IMPACT OF SULFONYLUREA THERAPY ON CARDIOVASCULAR OUTCOMES REMAINS UNCERTAIN. STUDIES OF NATURALLY OCCURRING GENETIC VARIATION CAN BE USED TO ANTICIPATE THE EXPECTED CLINICAL CONSEQUENCES OF A PHARMACOLOGICAL THERAPY. A COMMON MISSENSE VARIANT IN THE GENE ENCODING A COMPONENT OF THE SULFONYLUREA RECEPTOR (ABCC8 P.A1369S) PROM…	HARVARD MED SCH, MASSACHUSETTS GEN HOSP, DIV CARDIOL, CTR GENOM MED, BOSTON, MA 02115 USA.; BROAD INST, PROGRAM MED & POPULAT GENET, CAMBRIDGE, MA USA.; HARVARD MED SCH, MASSACHUSETTS GEN HOSP, DIABET UNIT, BOSTON, MA USA.;		10.2337/db17-0149	ARTICLE	CARDIOVASCULAR-DISEASE; ASSOCIATION; VARIANT; RISK	DIABETES	DIABETES	ENGLISH	AMER DIABETES ASSOC	2017	KHERA, AV (CORRESPONDING AUTHOR), HARVARD MED SCH, MASSACHUSETTS GEN HOSP, DIV CARDIOL, CTR GENOM MED, BOSTON, MA 02115 USA.; KHERA, AV (CORRESPONDING AUTHOR), BROAD INST, PROGRAM MED & POPULAT GENET, CAMBRIDGE, MA USA.	0012-1797	DIABETES	19	GENETIC VARIATION AT THE SULFONYLUREA RECEPTOR TYPE 2 DIABETES AND CORONARY HEART DISEASE	66	ISI	HARVARD UNIVERSITY; HARVARD MEDICAL SCHOOL; MASSACHUSETTS GENERAL HOSPITAL; HARVARD UNIVERSITY; MASSACHUSETTS INSTITUTE OF TECHNOLOGY (MIT); BROAD INSTITUTE; HARVARD UNIVERSITY; MASSACHUSETTS GENERAL HOSPITAL; HARVARD MEDICAL SCHOOL	HARVARD MED SCH;BROAD INST		EMDIN CA, 2017, DIABETES	EMDIN CA, 2017, DIABETES
EMILSSON V;GUDMUNDSSON E;ASPELUND T;JONSSON B;GUDJONSSON A;LAUNER L;LAMB J;GUDMUNDSDOTTIR V;JENNINGS L;GUDNASON V	none	OBJECTIVE: AS SEVERITY OF OUTCOME IN COVID-19 IS DISPROPORTIONATELY HIGHER AMONG INDIVIDUALS WITH OBESITY, SMOKERS, PATIENTS WITH HYPERTENSION, KIDNEY DISEASE, CHRONIC PULMONARY DISEASE, CORONARY HEART DISEASE (CHD), AND/OR TYPE 2 DIABETES (T2D), SERUM LEVELS OF ACE2, THE CELLULAR ENTRY POINT FOR THE CORONAVIRUS SARS-COV-2, WERE EXAMINED IN THESE HIGH-RISK GROUPS. METHODS: ASSOCIATIONS OF ACE2 LE…	ICELANDIC HEART ASSOCIATION, KOPAVOGUR, ICELAND; FACULTY OF MEDICINE, UNIVERSITY OF ICELAND, REYKJAVIK, ICELAND; LABORATORY OF EPIDEMIOLOGY AND POPULATION SCIENCES, INTRAMURAL RESEARCH PROGRAM, NATIONAL INSTITUTE ON AGING, BETHESDA, MD, UNITED STATES; GNF NOVARTIS, SAN DIEGO, CA, UNITED STATES; NOVARTIS INSTITUTES FOR BIOMEDICAL RESEARCH, CAMBRIDGE, MA, UNITED STATES		10.1002/osp4.472	ARTICLE	ANGIOTENSIN CONVERTING ENZYME 2; BIOLOGICAL MARKER; AGED; ARTICLE; BLOOD LEVEL; BODY COMPOSITION; BODY MASS; CHRONIC LUNG DISEASE; CORONAVIRUS DISEASE 2019; DIASTOLIC BLOOD PRESSURE; ESTIMATED GLOMERULAR FILTRATION RATE; FEMALE; GENE EXPRESSION; GLUCOSE BLOOD LEVEL; HUMAN; HYPERTENSION; ICELANDER; IMMUNE RESPONSE; ISCHEMIC HEART DISEASE; KIDNEY DISEASE; MAJOR CLINICAL STUDY; MASS SPECTROMETRY; NO…	OBES SCI PRACT	OBES. SCI. PRACT.	ENGLISH	JOHN WILEY AND SONS INC	2021	V. EMILSSON; ICELANDIC HEART ASSOCIATION, KOPAVOGUR, ICELAND; EMAIL: VALUR@HJARTA.IS; V. GUDNASON; ICELANDIC HEART ASSOCIATION, KOPAVOGUR, ICELAND; EMAIL: V.GUDNASON@HJARTA.IS; V. EMILSSON; FACULTY OF MEDICINE, UNIVERSITY OF ICELAND, REYKJAVIK, ICELAND; EMAIL: VALUR@HJARTA.IS; V. GUDNASON; FACULTY OF MEDICINE, UNIVERSITY OF ICELAND, REYKJAVIK, ICELAND; EMAIL: V.GUDNASON@HJARTA.IS	20552238	OBESITY SCIENCE AND PRACTICE	18	SERUM LEVELS OF ACE2 ARE HIGHER IN PATIENTS WITH OBESITY AND DIABETES	7	ISI	ICELANDIC HEART ASSOCIATION;UNIVERSITY OF ICELAND;NATIONAL INSTITUTE ON AGING;NOVARTIS INSTITUTES FOR BIOMEDICAL RESEARCH	NOTREPORTED;ICELANDIC HEART ASSOCIATION;NOTREPORTED;NOTREPORTED;ICELANDIC HEART ASSOCIATION;NOTREPORTED;NOTREPORTED;UNIVERSITY OF ICELAND;NOTREPORTED;NOTREPORTED;UNIVERSITY OF ICELAND;NOTREPORTED		EMILSSON V, 2021, OBES SCI PRACT	EMILSSON V, 2021, OBES SCI PRACT
ENGELBERTSEN D;ANAND D;FREDRIKSON G;HOPKINS D;CORDER R;SHAH P;LAHIRI A;NILSSON J;BENGTSSON E	none	OBJECTIVE: ADVANCED GLYCATION END PRODUCTS (AGE) HAVE BEEN IMPLICATED IN DIABETIC VASCULAR COMPLICATIONS THROUGH ACTIVATION OF PRO-INFLAMMATORY GENES. AGE-MODIFIED PROTEINS ARE ALSO TARGETED BY THE IMMUNE SYSTEM RESULTING IN THE GENERATION OF AGE-SPECIFIC AUTOANTIBODIES, BUT THE ASSOCIATION OF THESE IMMUNE RESPONSES WITH DIABETIC VASCULOPATHY REMAINS TO BE FULLY ELUCIDATED. THE AIM OF THIS STUDY …	DEPARTMENT OF CLINICAL SCIENCES, SKÅNE UNIVERSITY HOSPITAL, LUND UNIVERSITY, MALMÖ, SWEDEN; CARDIAC IMAGING AND RESEARCH CENTRE, WELLINGTON HOSPITAL, LONDON, UNITED KINGDOM; DEPARTMENT OF BIOMEDICAL LABORATORY SCIENCE AND TECHNOLOGY, MALMÖ UNIVERSITY, MALMÖ, SWEDEN; DEPARTMENT OF DIABETIC MEDICINE, KING'S COLLEGE HOSPITAL, LONDON, UNITED KINGDOM; WILLIAM HARVEY RESEARCH INSTITUTE, LONDON, UNITED …	ATHEROSCLEROSIS; AUTOANTIBODIES; DIABETES	10.1111/j.1365-2796.2011.02411.x	ARTICLE	APOLIPOPROTEIN B-100; AUTOANTIBODIES; CORONARY ARTERY DISEASE; DIABETES COMPLICATIONS; DIABETES MELLITUS; TYPE 2; FEMALE; HUMANS; IMMUNOGLOBULIN G; IMMUNOGLOBULIN M; MALE; MIDDLE AGED; PYRUVALDEHYDE; VASCULAR CALCIFICATION; APOLIPOPROTEIN B100; CALCIUM; IMMUNOGLOBULIN G; IMMUNOGLOBULIN M; METHYLGLYOXAL; ADULT; ARTICLE; CALCIUM BLOOD LEVEL; CLINICAL OBSERVATION; CONTROLLED STUDY; CORONARY ARTERY A…	J INTERN MED (GBR)	J. INTERN. MED. (GBR)	ENGLISH		2012	D. ENGELBERTSEN; CRC ENTRANCE 72; 91:12, SUS, 20502 MALMÖ, SWEDEN; EMAIL: DANIEL.ENGELBERTSEN@MED.LU.SE	13652796	JOURNAL OF INTERNAL MEDICINE	27	HIGH LEVELS OF IGM AGAINST METHYLGLYOXALMODIFIED APOLIPOPROTEIN B100 ARE ASSOCIATED WITH LESS CORONARY ARTERY CALCIFICATION IN PATIENTS WITH TYPE 2 DIABETES	271	ISI	SKÅNE UNIVERSITY HOSPITAL;CARDIAC IMAGING AND RESEARCH CENTRE;MALMÖ UNIVERSITY;KING'S COLLEGE HOSPITAL;WILLIAM HARVEY RESEARCH INSTITUTE;ATHEROSCLEROSIS RESEARCH CENTER AND DIVISION OF CARDIOLOGY;DAVID GEFFEN SCHOOL OF MEDICINE	NOTREPORTED;NOTREPORTED;NOTREPORTED;NOTREPORTED		ENGELBERTSEN D, 2012, J INTERN MED (GBR)	ENGELBERTSEN D, 2012, J INTERN MED (GBR)
EVANS D;VISSCHER P;WRAY N	none	THE CURRENT PARADIGM WITHIN GENETIC DIAGNOSTICS IS TO TEST INDIVIDUALS ONLY AT LOCI KNOWN TO AFFECT RISK OF COMPLEX DISEASE - YET THE TECHNOLOGY EXISTS TO GENOTYPE AN INDIVIDUAL AT THOUSANDS OF LOCI ACROSS THE GENOME. WE INVESTIGATED WHETHER INFORMATION FROM GENOME-WIDE ASSOCIATION STUDIES COULD BE HARNESSED TO IMPROVE DISCRIMINATION OF COMPLEX DISEASE AFFECTION STATUS. WE EMPLOYED GENOME-WIDE DA…	DEPARTMENT OF SOCIAL MEDICINE, MRC CENTRE FOR CAUSAL ANALYSES IN TRANSLATIONAL EPIDEMIOLOGY, UNIVERSITY OF BRISTOL, BRISTOL BS8 2BN, OAKFIELD GROVE, UNITED KINGDOM; GENETIC EPIDEMIOLOGY AND QUEENSLAND STATISTICAL GENETICS, QUEENSLAND INSTITUTE OF MEDICAL RESEARCH, BRISBANE, QLD, AUSTRALIA		10.1093/hmg/ddp295	ARTICLE	COMPUTATIONAL BIOLOGY; GENETIC TESTING; GENOME; HUMAN; GENOME-WIDE ASSOCIATION STUDY; HUMANS; POLYMORPHISM; SINGLE NUCLEOTIDE; RISK FACTORS; AREA UNDER THE CURVE; ARTICLE; BIPOLAR DISORDER; CONTROLLED STUDY; CROHN DISEASE; DISEASE PREDISPOSITION; GENE LOCUS; GENETIC ASSOCIATION; GENETIC RISK; GENETIC SCREENING; GENETIC SUSCEPTIBILITY; GENETIC VARIABILITY; GENOME; HUMAN; HYPERTENSION; ISCHEMIC HEA…	HUM MOL GENET	HUM. MOL. GENET.	ENGLISH		2009	D.M. EVANS; DEPARTMENT OF SOCIAL MEDICINE, MRC CENTRE FOR CAUSAL ANALYSES IN TRANSLATIONAL EPIDEMIOLOGY, UNIVERSITY OF BRISTOL, BRISTOL BS8 2BN, OAKFIELD GROVE, UNITED KINGDOM; EMAIL: DAVE.EVANS@BRISTOL.AC.UK	14602083	HUMAN MOLECULAR GENETICS	238	HARNESSING THE INFORMATION CONTAINED WITHIN GENOMEWIDE ASSOCIATION STUDIES TO IMPROVE INDIVIDUAL PREDICTION OF COMPLEX DISEASE RISK	18	ISI	UNIVERSITY OF BRISTOL;QUEENSLAND INSTITUTE OF MEDICAL RESEARCH	NOTREPORTED;UNIVERSITY OF BRISTOL;NOTREPORTED		EVANS DM, 2009, HUM MOL GENET	EVANS DM, 2009, HUM MOL GENET
FEOFANOVA E;CHEN H;DAI Y;JIA P;GROVE M;MORRISON A;QI Q;DAVIGLUS M;CAI J;NORTH K;LAURIE C;KAPLAN R;BOERWINKLE E;YU B	ALTSHULER DM, 2015, NATURE, V526, P68, DOI 10.1038/NATURE15393;ARDLIE KG, 2015, SCIENCE, V348, P648, DOI 10.1126/SCIENCE.1262110;ASTLE WJ, 2016, CELL, V167, P1415, DOI 10.1016/J.CELL.2016.10.042;BENJAMINI Y, 1995, J R STAT SOC B, V57, P289, DOI 10.1111/J.2517-6161.1995.TB02031.X;BOTROS L, 2008, MOL HUM REPROD, V14, P679, DOI 10.1093/MOLEHR/GAN066;BULIK-SULLIVAN BK, 2015, NAT GENET, V47, P291, DOI…	VARIATION IN LEVELS OF THE HUMAN METABOLOME REFLECT CHANGES IN HOMEOSTASIS, PROVIDING A WINDOW INTO HEALTH AND DISEASE. THE GENETIC IMPACT ON CIRCULATING METABOLITES IN HISPANICS, A POPULATION WITH HIGH CARDIOMETABOLIC DISEASE BURDEN, IS LARGELY UNKNOWN. WE CONDUCTED GENOME-WIDE ASSOCIATION ANALYSES ON 640 CIRCULATING METABOLITES IN 3,926 HISPANIC COMMUNITY HEALTH STUDY/STUDY OF LATINOS PARTICIPA…	UNIV TEXAS HLTH SCI CTR HOUSTON, HUMAN GENET CTR, HOUSTON, TX 77030 USA.; UNIV TEXAS HLTH SCI CTR HOUSTON, CTR PRECIS HLTH, SCH BIOMED INFORMAT, HOUSTON, TX 77030 USA.; ALBERT EINSTEIN COLL MED, DEPT EPIDEMIOL & POPULAT HLTH, BRONX, NY 10461 USA.; UNIV ILLINOIS, INST MINOR HLTH RES, COLL MED, CHICAGO, IL 60612 USA.; UNIV N CAROLINA, DEPT BIOSTAT, GILLING SCH GLOBAL PUBL HLTH, CHAPEL HILL, NC 2759…		10.1016/j.ajhg.2020.09.003	ARTICLE	ACID AMIDE HYDROLASE; CARDIOVASCULAR-DISEASE; EXPRESSION; ENDOCANNABINOIDS; POPULATIONS; LANDSCAPE; DATABASE; DESIGN; TRAITS; RISK	AM J HUM GENET	AM. J. HUM. GENET.	ENGLISH	CELL PRESS	2020	YU, B (CORRESPONDING AUTHOR), UNIV TEXAS HLTH SCI CTR HOUSTON, HUMAN GENET CTR, HOUSTON, TX 77030 USA.	0002-9297	AMERICAN JOURNAL OF HUMAN GENETICS	35	A GENOMEWIDE ASSOCIATION STUDY DISCOVERS 46 LOCI OF THE HUMAN METABOLOME IN THE HISPANIC COMMUNITY HEALTH STUDYSTUDY OF LATINOS	107	ISI	UNIVERSITY OF TEXAS SYSTEM; UNIVERSITY OF TEXAS HEALTH SCIENCE CENTER HOUSTON; UNIVERSITY OF TEXAS SYSTEM; UNIVERSITY OF TEXAS HEALTH SCIENCE CENTER HOUSTON; YESHIVA UNIVERSITY; ALBERT EINSTEIN COLLEGE OF MEDICINE; UNIVERSITY OF ILLINOIS SYSTEM; UNIVERSITY OF ILLINOIS CHICAGO; UNIVERSITY OF ILLINOIS CHICAGO HOSPITAL; UNIVERSITY OF NORTH CAROLINA; UNIVERSITY OF NORTH CAROLINA CHAPEL HILL; UNIVERSI…	UNIV TEXAS HLTH SCI CTR HOUSTON		FEOFANOVA EV, 2020, AM J HUM GENET	FEOFANOVA EV, 2020, AM J HUM GENET
FREITAG D;BUTTERWORTH A;WILLEIT P;HOWSON J;BURGESS S;KAPTOGE S;YOUNG R;HO W;WOOD A;SWEETING M;SPACKMAN S;STALEY J;RAMOND A;HARSHFIELD E;NIELSEN S;GRANDE P;LANGE L;BOWN M;JONES G;SCOTT R;BEVAN S;PORCU E;THORLEIFSSON G;ZENG L;KESSLER T;NIKPAY M;DO R;ZHANG W;HOPEWELL J;KLEBER M;DELGADO G;NELSON C;GOEL A;BIS J;DEHGHAN A;LIGTHART S;SMITH A;QU L;VAN ' H F;DE B P;BAAS A;VAN R A;TROMP G;KUIVANIEMI H;RITC…	none	TO INVESTIGATE POTENTIAL CARDIOVASCULAR AND OTHER EFFECTS OF LONG-TERM PHARMACOLOGICAL INTERLEUKIN 1 (IL-1) INHIBITION, WE STUDIED GENETIC VARIANTS THAT PRODUCE INHIBITION OF IL-1, A MASTER REGULATOR OF INFLAMMATION. METHODS: WE CREATED A GENETIC SCORE COMBINING THE EFFECTS OF ALLELES OF TWO COMMON VARIANTS (RS6743376 AND RS1542176) THAT ARE LOCATED UPSTREAM OF IL1RN, THE GENE ENCODING THE IL-1 R…	UNIVERSITY OF CAMBRIDGE, CAMBRIDGE, UNITED KINGDOM; COPENHAGEN UNIVERSITY HOSPITAL, UNIVERSITY OF COPENHAGEN, COPENHAGEN, DENMARK; UNIVERSITY OF NORTH CAROLINA, CHAPEL HILL, NC, UNITED STATES; UNIVERSITY OF LEICESTER, NATIONAL INSTITUTE FOR HEALTH RESEARCH LEICESTER CARDIOVASCULAR BIOMEDICAL RESEARCH UNIT, LEICESTER, UNITED KINGDOM; UNIVERSITY OF OTAGO, DUNEDIN, NEW ZEALAND; MEDICAL RESEARCH COUN…		10.1016/S2213-8587(15)00034-0	ARTICLE	ALLELES; AORTIC ANEURYSM; ABDOMINAL; ARTHRITIS; RHEUMATOID; C-REACTIVE PROTEIN; CARDIOVASCULAR DISEASES; CHOLESTEROL; LDL; CORONARY DISEASE; DIABETES MELLITUS; TYPE 2; GENE DOSAGE; GENOTYPE; HUMANS; INTERLEUKIN 1 RECEPTOR ANTAGONIST PROTEIN; INTERLEUKIN-6; MENDELIAN RANDOMIZATION ANALYSIS; ODDS RATIO; RNA; MESSENGER; STROKE; UP-REGULATION; C REACTIVE PROTEIN; INTERLEUKIN 1; INTERLEUKIN 1 RECEPTOR…	LANCET DIABETES ENDOCRINOL	LANCET DIABETES ENDOCRINOL.	ENGLISH	LANCET PUBLISHING GROUP	2015		22138587	THE LANCET DIABETES AND ENDOCRINOLOGY	104	CARDIOMETABOLIC EFFECTS OF GENETIC UPREGULATION OF THE INTERLEUKIN 1 RECEPTOR ANTAGONIST A MENDELIAN RANDOMISATION ANALYSIS	3	ISI	UNIVERSITY OF CAMBRIDGE;COPENHAGEN UNIVERSITY HOSPITAL;UNIVERSITY OF NORTH CAROLINA;UNIVERSITY OF LEICESTER;UNIVERSITY OF OTAGO;MEDICAL RESEARCH COUNCIL EPIDEMIOLOGY UNIT;UNIVERSITY OF CAMBRIDGE;ISTITUTO DI RICERCA GENETICA E BIOMEDICA;TECHNISCHE UNIVERSITÄT MÜNCHEN;UNIVERSITY OF OTTAWA HEART INSTITUTE;BROAD INSTITUTE;IMPERIAL COLLEGE;UNIVERSITY OF OXFORD;UNIVERSITY OF HEIDELBERG;UNIVERSITY OF LE…	UNIVERSITY OF CAMBRIDGE;COPENHAGEN UNIVERSITY HOSPITAL;UNIVERSITY OF NORTH CAROLINA;UNIVERSITY OF LEICESTER;UNIVERSITY OF OTAGO;MEDICAL RESEARCH COUNCIL EPIDEMIOLOGY UNIT;UNIVERSITY OF CAMBRIDGE;ISTITUTO DI RICERCA GENETICA E BIOMEDICA;NOTREPORTED;TECHNISCHE UNIVERSITÄT MÜNCHEN;UNIVERSITY OF OTTAWA HEART INSTITUTE;BROAD INSTITUTE;IMPERIAL COLLEGE;UNIVERSITY OF OXFORD;UNIVERSITY OF HEIDELBERG;UNIV…		FREITAG D, 2015, LANCET DIABETES ENDOCRINOL	FREITAG D, 2015, LANCET DIABETES ENDOCRINOL
GALA-BŁĄDZIŃSKA A;CZECH J;BRAUN M;SKRZYPA M;GARGASZ K;MAZUR A;ZAWLIK I	none	PURPOSE: DIABETES MELLITUS TYPE 2 (T2DM) AND ITS VASCULAR COMPLICATIONS ARE A SERIOUS WORLD HEALTH PROBLEM. FOR THIS REASON IT IS IMPORTANT TO LOOK FOR NEW DIABETES COMPLICATION RISK FACTORS. THE AIM OF THIS STUDY WAS TO DETERMINE WHETHER 18-BP INSERTION/DELETION (I/D) POLYMORPHISM AT −2549 POSITION OF THE VASCULAR ENDOTHELIAL GROWTH FACTOR (VEGF) GENE IS ASSOCIATED WITH DIABETIC VASCULAR COMPLIC…	DIALYSIS CENTER, ST’QUEEN JADWIGA CLINICAL DISTRICT HOSPITAL NO 2 IN RZESZÓW, RZESZÓW, POLAND; DEPARTMENT OF GENETICS, CHAIR OF MOLECULAR MEDICINE, FACULTY OF MEDICINE, UNIVERSITY OF RZESZÓW, RZESZÓW, POLAND; DEPARTMENT OF PATHOLOGY, CHAIR OF ONCOLOGY, MEDICAL UNIVERSITY OF LODZ, LODZ, POLAND; POSTGRADUATE SCHOOL OF MOLECULAR MEDICINE, MEDICAL UNIVERSITY OF WARSAW, WARSAW, POLAND; FACULTY OF MEDI…	DIABETIC VASCULAR COMPLICATIONS; VEGF POLYMORPHISM	10.1016/j.advms.2018.08.011	ARTICLE	ADULT; AGED; AGED; 80 AND OVER; BIOMARKERS; DIABETES MELLITUS; TYPE 2; DIABETIC ANGIOPATHIES; FEMALE; GENETIC ASSOCIATION STUDIES; GENETIC PREDISPOSITION TO DISEASE; HUMANS; INDEL MUTATION; MALE; MIDDLE AGED; MULTIVARIATE ANALYSIS; POLYMORPHISM; GENETIC; RENAL INSUFFICIENCY; CHRONIC; VASCULAR ENDOTHELIAL GROWTH FACTOR A; HEMOGLOBIN A1C; LIPID; VASCULOTROPIN; BIOLOGICAL MARKER; VASCULOTROPIN A; AD…	ADV MED SCI	ADV. MED. SCI.	ENGLISH	MEDICAL UNIVERSITY OF BIALYSTOK	2019	A. GALA-BŁĄDZIŃSKA; DIALYSIS CENTER, ST’QUEEN JADWIGA CLINICAL DISTRICT HOSPITAL NO 2 IN RZESZÓW, RZESZÓW, LWOWSKA 60 STREET, 35-301, POLAND; EMAIL: AGALA.EDU@GMAIL.COM	18961126	ADVANCES IN MEDICAL SCIENCES	8	ASSOCIATION OF 18BP INSERTIONDELETION POLYMORPHISM AT 2549 POSITION OF VEGF GENE WITH DIABETIC VASCULAR COMPLICATIONS IN TYPE 2 DIABETES MELLITUS	64	ISI	DIALYSIS CENTER;UNIVERSITY OF RZESZÓW;MEDICAL UNIVERSITY OF LODZ;MEDICAL UNIVERSITY OF WARSAW;UNIVERSITY OF RZESZÓW;UNIVERSITY OF RZESZÓW;UNIVERSITY OF RZESZÓW	NOTREPORTED;DIALYSIS CENTER;NOTREPORTED		GALA-BŁĄDZIŃSKA A, 2019, ADV MED SCI	GALA-BŁĄDZIŃSKA A, 2019, ADV MED SCI
GAN W;BRAGG F;WALTERS R;MILLWOOD I;LIN K;CHEN Y;GUO Y;VAUCHER J;BIAN Z;BENNETT D;LV J;YU C;MAHAJAN A;CLARKE R;LI L;HOLMES M;MCCARTHY M;CHEN Z	ADAMS HP, 1993, STROKE, V24, P35, DOI 10.1161/01.STR.24.1.35;AHMAD OS, 2015, NAT COMMUN, V6, DOI 10.1038/NCOMMS8060;ANONYMOUS, 2017, DIABETES ATLAS;BEZERRA DC, 2012, NEUROLOGY, V78, P102, DOI 10.1212/WNL.0B013E31823EFC42;BOULANGER M, 2016, NEUROLOGY, V87, P870, DOI 10.1212/WNL.0000000000003031;BOWDEN J, 2016, GENET EPIDEMIOL, V40, P304, DOI 10.1002/GEPI.21965;BOWDEN J, 2015, INT J EPIDEMIOL, V44,…	IN OBSERVATIONAL STUDIES, TYPE 2 DIABETES IS ASSOCIATED WITH TWO- TO FOURFOLD HIGHER RISK OF CARDIOVASCULAR DISEASES (CVD). USING DATA FROM THE CHINA KADOORIE BIOBANK (CKB), WE EXAMINED ASSOCIATIONS OF GENETICALLY PREDICTED TYPE 2 DIABETES WITH CVD AMONG SIMILAR TO 160,000 PARTICIPANTS TO ASSESS WHETHER THESE RELATIONSHIPS ARE CAUSAL. A TYPE 2 DIABETES GENETIC RISK SCORE (COMPRISING 48 ESTABLISHE…	UNIV OXFORD, NUFFIELD DEPT POPULAT HLTH, CLIN TRIAL SERV UNIT, OXFORD, ENGLAND.; UNIV OXFORD, NUFFIELD DEPT POPULAT HLTH, EPIDEMIOL STUDIES UNIT, OXFORD, ENGLAND.; UNIV OXFORD, WELLCOME TRUST CTR HUMAN GENET, OXFORD, ENGLAND.; UNIV OXFORD, MED RES COUNCIL, POPULAT HLTH RES UNIT, OXFORD, ENGLAND.; CHINESE ACAD MED SCI, BEIJING, PEOPLES R CHINA.; UNIV HOSP LAUSANNE, DEPT INTERNAL MED, LAUSANNE, SWI…		10.2337/db19-0224	ARTICLE	GENOME-WIDE ASSOCIATION; ISCHEMIC-STROKE; MENDELIAN RANDOMIZATION; CAROTID ATHEROSCLEROSIS; VASCULAR-DISEASE; BLOOD-GLUCOSE; TASK-FORCE; METAANALYSIS; VARIANTS; SUBTYPES	DIABETES	DIABETES	ENGLISH	AMER DIABETES ASSOC	2019	HOLMES, MV; CHEN, ZM (CORRESPONDING AUTHOR), UNIV OXFORD, NUFFIELD DEPT POPULAT HLTH, CLIN TRIAL SERV UNIT, OXFORD, ENGLAND.; HOLMES, MV; CHEN, ZM (CORRESPONDING AUTHOR), UNIV OXFORD, NUFFIELD DEPT POPULAT HLTH, EPIDEMIOL STUDIES UNIT, OXFORD, ENGLAND.; MCCARTHY, MI (CORRESPONDING AUTHOR), UNIV OXFORD, WELLCOME TRUST CTR HUMAN GENET, OXFORD, ENGLAND.; HOLMES, MV (CORRESPONDING AUTHOR), UNIV OXFOR…	0012-1797	DIABETES	29	GENETIC PREDISPOSITION TO TYPE 2 DIABETES AND RISK OF SUBCLINICAL ATHEROSCLEROSIS AND CARDIOVASCULAR DISEASES AMONG 160000 CHINESE ADULTS	68	ISI	UNIVERSITY OF OXFORD; UNIVERSITY OF OXFORD; UNIVERSITY OF OXFORD; WELLCOME CENTRE FOR HUMAN GENETICS; UK RESEARCH AND INNOVATION (UKRI); MEDICAL RESEARCH COUNCIL UK (MRC); UNIVERSITY OF OXFORD; CHINESE ACADEMY OF MEDICAL SCIENCES - PEKING UNION MEDICAL COLLEGE; UNIVERSITY OF LAUSANNE; CENTRE HOSPITALIER UNIVERSITAIRE VAUDOIS (CHUV); UNIVERSITY OF LAUSANNE; PEKING UNIVERSITY; UNIVERSITY OF OXFORD;…	NOTREPORTED;UNIV OXFORD;NOTREPORTED;UNIV OXFORD;UNIV OXFORD;UNIV OXFORD;UNIV OXFORD;NOTREPORTED;NATL INST HLTH RES		GAN W, 2019, DIABETES	GAN W, 2019, DIABETES
GAO C;FU X;CHU Q;LI J;SHU G	none	BACKGROUND: APOLIPOPROTEIN E (APOE) POLYMORPHISMS ARE ASSOCIATED WITH TYPE 2 DIABETES MELLITUS (T2DM) AND ITS COMPLICATIONS, BUT STUDIES HAVE SHOWN CONFLICTING RESULTS. OBJECTIVE: TO EXAMINE THE RELATIONSHIP OF APOE GENE POLYMORPHISMS WITH T2DM AND ITS COMPLICATIONS. MATERIALS AND METHODS: THIS CASE-CONTROL STUDY OF PATIENTS WITH T2DM WAS CONDUCTED BETWEEN JUNE 2016 AND JULY 2019. HEALTHY INDIVID…	CADRE WARD-2, FOURTH MEDICAL CENTER OF GENERAL HOSPITAL OF PLA, BEIJING, CHINA	APOLIPOPROTEIN E; CEREBRAL INFARCTION; CORONARY HEART DISEASE; NEPHROPATHY; TYPE 2 DIABETES MELLITUS	10.1089/gtmb.2020.0130	ARTICLE	AGED; ALLELES; APOLIPOPROTEINS E; CASE-CONTROL STUDIES; CHINA; DIABETES COMPLICATIONS; DIABETES MELLITUS; TYPE 2; DIABETIC NEPHROPATHIES; FEMALE; GENE FREQUENCY; GENETIC PREDISPOSITION TO DISEASE; GENOTYPE; HUMANS; MALE; MIDDLE AGED; POLYMORPHISM; GENETIC; RISK FACTORS; APOLIPOPROTEIN E; APOE PROTEIN; HUMAN; APOLIPOPROTEIN E; AGED; ARTICLE; BRAIN INFARCTION; CASE CONTROL STUDY; CHINESE; CONTROLLE…	GENT TEST AND MOL BIOMARKERS	GENT. TEST. AND MOL. BIOMARKERS	ENGLISH	MARY ANN LIEBERT INC.	2021	G. SHU; CADRE WARD-2, FOURTH MEDICAL CENTER OF GENERAL HOSPITAL OF PLA, BEIJING, HAIDIAN DISTRICT, 51 FUCHENG ROAD, 100048, CHINA; EMAIL: SDFOREST@163.COM	19450265	GENETIC TESTING AND MOLECULAR BIOMARKERS	7	RELATIONSHIP BETWEEN THE APOE GENE POLYMORPHISM AND TYPE 2 DIABETES MELLITUS COMPLICATIONS	25	ISI	BEIJING	NOTREPORTED;FOURTH MEDICAL CENTER OF GENERAL HOSPITAL OF PLA;NOTDECLARED		GAO C, 2021, GENT TEST AND MOL BIOMARKERS	GAO C, 2021, GENT TEST AND MOL BIOMARKERS
GOLBUS J;STITZIEL N;ZHAO W;XUE C;FARRALL M;MCPHERSON R;ERDMANN J;DELOUKAS P;WATKINS H;SCHUNKERT H;SAMANI N;SALEHEEN D;KATHIRESAN S;REILLY M	none	BACKGROUND - THE CHEMOKINE RECEPTORS CCR2, CCR5, AND CX3CR1 COORDINATE MONOCYTE TRAFFICKING IN HOMEOSTATIC AND INFLAMMATORY STATES. MULTIPLE SMALL HUMAN GENETIC STUDIES HAVE VARIABLY LINKED SINGLE NUCLEOTIDE POLYMORPHISMS IN THESE GENES TO CARDIOMETABOLIC DISEASE. WE INTERROGATED GENOME-WIDE ASSOCIATION, EXOME SEQUENCING, AND EXOME ARRAY GENOTYPING STUDIES TO ASCERTAIN THE RELATIONSHIP BETWEEN VA…	DEPARTMENT OF MEDICINE, HOSPITAL OF THE UNIVERSITY OF PENNSYLVANIA, PHILADELPHIA, PA, UNITED STATES; CARDIOVASCULAR DIVISION, DEPARTMENT OF MEDICINE, WASHINGTON UNIVERSITY SCHOOL OF MEDICINE, ST. LOUIS, MO, UNITED STATES; DEPARTMENT OF GENETICS AND MCDONNELL GENOME INSTITUTE, WASHINGTON UNIVERSITY, SCHOOL OF MEDICINE, ST. LOUIS, MO, UNITED STATES; DEPARTMENT OF BIOSTATISTICS AND EPIDEMIOLOGY, PER…	ATHEROSCLEROSIS; DIABETES MELLITUS; GENETICS; GENOME-WIDE ASSOCIATION STUDY; MYOCARDIAL INFARCTION	10.1161/CIRCGENETICS.115.001374	ARTICLE	ASIAN CONTINENTAL ANCESTRY GROUP; CORONARY ARTERY DISEASE; DATABASES; GENETIC; EUROPE; EUROPEAN CONTINENTAL ANCESTRY GROUP; EXOME; GENE FREQUENCY; GENETIC PREDISPOSITION TO DISEASE; GENOME-WIDE ASSOCIATION STUDY; GLUCOSE METABOLISM DISORDERS; HUMANS; MYOCARDIAL INFARCTION; PAKISTAN; PHENOTYPE; POLYMORPHISM; SINGLE NUCLEOTIDE; RECEPTORS; CCR2; RECEPTORS; CCR5; RECEPTORS; CHEMOKINE; RETROSPECTIVE S…	CIRC CARDIOVASC GENET	CIRC. CARDIOVASC. GENET.	ENGLISH	LIPPINCOTT WILLIAMS AND WILKINS	2016	M.P. REILLY; DEPARTMENT OF MEDICINE, COLUMBIA UNIVERSITY, NEW YORK, 622 W 168TH ST, 10032, UNITED STATES; EMAIL: MPR2144@CUMC.COLUMBIA.EDU	1942325X	CIRCULATION: CARDIOVASCULAR GENETICS	19	COMMON AND RARE GENETIC VARIATION IN CCR2 CCR5 OR CX3CR1 AND RISK OF ATHEROSCLEROTIC CORONARY HEART DISEASE AND GLUCOMETABOLIC TRAITS	9	ISI	HOSPITAL OF THE UNIVERSITY OF PENNSYLVANIA;WASHINGTON UNIVERSITY SCHOOL OF MEDICINE;WASHINGTON UNIVERSITY;UNIVERSITY OF PENNSYLVANIA;UNIVERSITY OF OXFORD;UNIVERSITY OF OTTAWA HEART INSTITUTE;UNIVERSITY OF LÜBECK;QUEEN MARY UNIVERSITY LONDON;TECHNISCHE UNIVERSITÄT MÜNCHEN;UNIVERSITY OF LEICESTER;CENTER FOR HUMAN GENETIC RESEARCH;HARVARD MEDICAL SCHOOL;BROAD INSTITUTE;COLUMBIA UNIVERSITY	NOTREPORTED;COLUMBIA UNIVERSITY;NOTREPORTED		GOLBUS JR, 2016, CIRC CARDIOVASC GENET	GOLBUS JR, 2016, CIRC CARDIOVASC GENET
GONCHAROVA I;KOROLEVA Y;SLEPTSOV A;PECHERINA T;KASHTALAP V;PUZYREV V;NAZARENKO M	none	ABSTRACT: THE GENETIC STRUCTURE OF SUSCEPTIBILITY TO CARDIOVASCULAR DISEASE CONTINUUM (CVDC) COMORBIDITY WAS ANALYZED, AND THE FUNCTIONAL IMPORTANCE OF THE GENETIC VARIANTS ASSOCIATED WITH THE PATHOLOGY WAS ASSESSED. THE ASSOCIATION WITH CVDC WAS DEMONSTRATED FOR THE RS1333049 (CDKN2B-AS1), RS3739998 (KIAA1462), RS3765124 (ADAMDEC1), AND RS1007856 (ITGB5) POLYMORPHISMS THAT FORMED THE GENETIC STR…	RESEARCH INSTITUTE OF MEDICAL GENETICS, TOMSK NATIONAL RESEARCH MEDICAL CENTER, RUSSIAN ACADEMY OF SCIENCES, TOMSK, 634050, RUSSIAN FEDERATION; RESEARCH INSTITUTE FOR COMPLEX ISSUES OF CARDIOVASCULAR DISEASES, KEMEROVO, 650002, RUSSIAN FEDERATION; SIBERIAN STATE MEDICAL UNIVERSITY, TOMSK, 634050, RUSSIAN FEDERATION	COMORBIDITY OF THE CARDIOVASCULAR CONTINUUM; CORONARY HEART DISEASE; EQTL; MYOCARDIAL INFARCTION; POLYMORPHISM; RSNPS	10.1134/S1022795422100039	ARTICLE	CYCLIN DEPENDENT KINASE INHIBITOR 2B; MACROPHAGE ELASTASE; STROMELYSIN; TISSUE INHIBITOR OF METALLOPROTEINASE 2; TRANSCRIPTION FACTOR; ACUTE CORONARY SYNDROME; ADAMDEC1 GENE; ADULT; AQP2 GENE; ARTICLE; ATHEROSCLEROSIS; BINDING SITE; CARDIOVASCULAR DISEASE; COMORBIDITY; COMPUTER MODEL; CONTROLLED STUDY; CORONARY ARTERY BYPASS GRAFT; DDX5 GENE; DNA BINDING; DNA MICROARRAY; DNA SEQUENCE; EPIGENETICS…	RUSS J GEN	RUSS. J. GEN.	ENGLISH	PLEIADES JOURNALS	2022	I.A. GONCHAROVA; RESEARCH INSTITUTE OF MEDICAL GENETICS, TOMSK NATIONAL RESEARCH MEDICAL CENTER, RUSSIAN ACADEMY OF SCIENCES, TOMSK, 634050, RUSSIAN FEDERATION; EMAIL: IRINA.GONCHAROVA@MEDGENETICS.RU	10227954	RUSSIAN JOURNAL OF GENETICS	0	GENETIC STRUCTURE OF SUSCEPTIBILITY TO CARDIOVASCULAR CONTINUUM COMORBIDITY	58	ISI	RESEARCH INSTITUTE OF MEDICAL GENETICS;RESEARCH INSTITUTE FOR COMPLEX ISSUES OF CARDIOVASCULAR DISEASES;SIBERIAN STATE MEDICAL UNIVERSITY	NOTREPORTED;RESEARCH INSTITUTE OF MEDICAL GENETICS;NOTREPORTED		GONCHAROVA IA, 2022, RUSS J GEN	GONCHAROVA IA, 2022, RUSS J GEN
GONZÁLEZ R;TIRADO A;BALANDA M;ALVO M;BARQUIN I;DURRUTY P;LOBOS S;SEELENFREUND D	none	DIABETIC NEPHROPATHY (DN) IS ONE OF THE MAJOR COMPLICATIONS OF TYPE 2 DIABETES AND IS ASSOCIATED WITH CORONARY DISEASE. NEPHRIN, A PROTEIN MAINLY EXPRESSED IN GLOMERULI, IS DECREASED IN DN AND OTHER KIDNEY DISEASES. SINCE INSULIN LEVELS ARE MISREGULATED IN TYPE 2 DIABETES, A POSSIBLE CONNECTION BETWEEN DN AND ITS DECREASED NEPHRIN EXPRESSION COULD BE THE PRESENCE OF REGULATORY ELEMENTS RESPONSIVE…	LABORATORIO DE BIOQUÍMICA, DEPARTAMENTO DE BIOQUÍMICA Y BIOLOGÍA MOLECULAR, UNIVERSIDAD DE CHILE, SANTIAGO, VICUÑA MACKENNA 20, CHILE; SECCIÓN DE NEFROLOGÍA, HOSPITAL CLÍNICO, UNIVERSIDAD DE CHILE, SANTIAGO, VICUÑA MACKENNA 20, CHILE; CENTRO CARDIOVASCULAR, HOSPITAL CLÍNICO DE LA UNIVERSIDAD DE CHILE, SANTIAGO, CHILE; DEPARTAMENTO DE DIABETES, FACULTAD DE MEDICINA OCCIDENTE, UNIVERSIDAD DE CHILE,…	GAGA BOX; GENE PROMOTER; NEPHRIN; POLYMORPHISM	10.4067/S0716-97602007000400010	ARTICLE	HOMEODOMAIN PROTEIN; NEPHRIN; PURINE; TRANSCRIPTION FACTOR GAGA; UNCLASSIFIED DRUG; ADULT; AGED; ARTICLE; BIOINFORMATICS; CLINICAL ARTICLE; CONTROLLED STUDY; DIABETIC PATIENT; FEMALE; GENE SEQUENCE; GENETIC ASSOCIATION; GENETIC POLYMORPHISM; GENETIC VARIABILITY; GENOME ANALYSIS; HUMAN; HUMAN CELL; MALE; NON INSULIN DEPENDENT DIABETES MELLITUS; PATHOPHYSIOLOGY; PILOT STUDY; PROMOTER REGION; REGULA…	BIOL RES	BIOL. RES.	ENGLISH	SOCIETY OF BIOLOGY OF CHILE	2007	D. SEELENFREUND; LABORATORIO DE BIOQUÍMICA, DEPARTAMENTO DE BIOQUÍMICA Y BIOLOGÍA MOLECULAR, UNIVERSIDAD DE CHILE, SANTIAGO, VICUÑA MACKENNA 20, CHILE; EMAIL: DSEELEN@CIQ.UCHILE.CL	07169760	BIOLOGICAL RESEARCH	1	A PILOT STUDY ON GENETIC VARIATION IN PURINERICH ELEMENTS IN THE NEPHRIN GENE PROMOTER IN TYPE 2 DIABETIC PATIENTS	40	ISI	UNIVERSIDAD DE CHILE;UNIVERSIDAD DE CHILE;HOSPITAL CLÍNICO DE LA UNIVERSIDAD DE CHILE;UNIVERSIDAD DE CHILE	NOTREPORTED;UNIVERSIDAD DE CHILE;NOTREPORTED		GONZÁLEZ R, 2007, BIOL RES	GONZÁLEZ R, 2007, BIOL RES
GOODARZI M;ROTTER J	AFARIDEH M, 2017, DIABETES METAB, V43, P180, DOI 10.1016/J.DIABET.2016.07.032;AHLQVIST E, 2018, LANCET DIABETES ENDO, V6, P361, DOI 10.1016/S2213-8587(18)30051-2;AHMAD OS, 2015, NAT COMMUN, V6, DOI 10.1038/NCOMMS8060;ALMGREN P, 2011, DIABETOLOGIA, V54, P2811, DOI 10.1007/S00125-011-2267-5;ALTSHULER D, 2000, NAT GENET, V26, P76, DOI 10.1038/79216;ANDREOZZI F, 2013, ATHEROSCLEROSIS, V229, P277, DOI…	DIABETES MELLITUS IS A MAJOR RISK FACTOR FOR CORONARY HEART DISEASE (CHD). THE MAJOR FORM OF DIABETES MELLITUS IS TYPE 2 DIABETES MELLITUS (T2D), WHICH IS THUS LARGELY RESPONSIBLE FOR THE CHD ASSOCIATION IN THE GENERAL POPULATION. RECENT YEARS HAVE SEEN MAJOR ADVANCES IN THE GENETICS OF T2D, PRINCIPALLY THROUGH EVER-INCREASING LARGE-SCALE GENOME-WIDE ASSOCIATION STUDIES. THIS ARTICLE ADDRESSES TH…	CEDARS SINAI MED CTR, DEPT MED, DIV ENDOCRINOL DIABET & METAB, LOS ANGELES, CA 90048 USA.; HARBOR UCLA MED CTR, INST TRANSLAT GENOM & POPULAT SCI, TORRANCE, CA 90509 USA.; HARBOR UCLA MED CTR, DEPT PEDIAT, LUNDQUIST INST BIOMED INNOVAT, TORRANCE, CA 90509 USA.;	CORONARY ARTERY DISEASE; DIABETES MELLITUS; GLUCOSE TOLERANCE TEST; INSULIN RESISTANCE; RISK FACTOR	10.1161/CIRCRESAHA.119.316065	ARTICLE	GENOME-WIDE ASSOCIATION; DENSITY-LIPOPROTEIN CHOLESTEROL; INTIMA-MEDIA THICKNESS; INCIDENT CARDIOVASCULAR-DISEASE; HOMEOSTASIS MODEL ASSESSMENT; INTENSIVE GLUCOSE CONTROL; FASTING BLOOD-GLUCOSE; BODY-FAT DISTRIBUTION; MIDDLE-AGED MEN; INSULIN-RESISTANCE	CIRC RES	CIRC.RES.	ENGLISH	LIPPINCOTT WILLIAMS & WILKINS	2020	GOODARZI, MO (CORRESPONDING AUTHOR), CEDARS SINAI MED CTR, DIV ENDOCRINOL DIABET & METAB, 8700 BEVERLY BLVD,ROOM B-131, LOS ANGELES, CA 90048 USA.	0009-7330	CIRCULATION RESEARCH	43	GENETICS INSIGHTS IN THE RELATIONSHIP BETWEEN TYPE 2 DIABETES AND CORONARY HEART DISEASE	126	ISI	CEDARS SINAI MEDICAL CENTER; UNIVERSITY OF CALIFORNIA SYSTEM; UNIVERSITY OF CALIFORNIA LOS ANGELES; UNIVERSITY OF CALIFORNIA LOS ANGELES MEDICAL CENTER; UNIVERSITY OF CALIFORNIA SYSTEM; UNIVERSITY OF CALIFORNIA LOS ANGELES; UNIVERSITY OF CALIFORNIA LOS ANGELES MEDICAL CENTER	CEDARS SINAI MED CTR		GOODARZI MO, 2020, CIRC RES	GOODARZI MO, 2020, CIRC RES
GOODARZI M;TAYLOR K;GUO X;QUIÑONES M;CUI J;LI Y;SAAD M;YANG H;HSUEH W;HODIS H;ROTTER J	none	THE POWERFUL RELATION BETWEEN ATHEROSCLEROSIS AND DIABETES MAY HAVE A COMMON GENETIC BASIS. HOWEVER, FEW GENES PREDISPOSING TO BOTH HAVE BEEN IDENTIFIED. CALPAIN-10 (CAPN10) WAS THE FIRST GENE FOR TYPE 2 DIABETES IDENTIFIED BY POSITIONAL CLONING, WHEREIN A COMBINATION OF HAPLOTYPES CONFERRED INCREASED RISK OF DIABETES. WE SOUGHT TO DETERMINE WHETHER CAPN10 INFLUENCES SUBCLINICAL ATHEROSCLEROSIS. …	DIV. OF ENDOCRINOL., DIABET./METAB., DEPARTMENT OF MEDICINE, CEDARS-SINAI MEDICAL CENTER, LOS ANGELES, CA, UNITED STATES; MEDICAL GENETICS INSTITUTE, CEDARS-SINAI MEDICAL CENTER, LOS ANGELES, CA, UNITED STATES; DEPARTMENT OF MEDICINE, DAVID GEFFEN SCHOOL OF MEDICINE, UNIV. OF CA AT LOS ANGELES (UCLA), LOS ANGELES, CA, UNITED STATES; DIV. OF EPIDEMIOL. AND PREV. MED., DEPARTMENT OF MEDICINE, DAVID…		10.2337/diabetes.54.4.1228	ARTICLE	ADOLESCENT; ADULT; AGED; ARTERIOSCLEROSIS; CALPAIN; CAROTID ARTERY DISEASES; CORONARY DISEASE; DIABETES MELLITUS; TYPE 2; FEMALE; GENETIC PREDISPOSITION TO DISEASE; GENOTYPE; HAPLOTYPES; HUMANS; INSULIN RESISTANCE; MALE; MEXICAN AMERICANS; MIDDLE AGED; PHENOTYPE; TUNICA INTIMA; CALPAIN; CYSTEINE PROTEINASE; GLUCOSE; HIGH DENSITY LIPOPROTEIN CHOLESTEROL; INSULIN; LOW DENSITY LIPOPROTEIN CHOLESTERO…	DIABETES	DIABETES	ENGLISH		2005	M.O. GOODARZI; CEDARS-SINAI MEDICAL CENTER, DIV. OF ENDOCRINOL., DIABET./METAB., LOS ANGELES, CA 90048, 8700 BEVERLY BLVD., UNITED STATES; EMAIL: MARK.GOODARZI@CSHS.ORG	00121797	DIABETES	24	ASSOCIATION OF THE DIABETES GENE CALPAIN10 WITH SUBCLINICAL ATHEROSCLEROSIS THE MEXICANAMERICAN CORONARY ARTERY DISEASE STUDY	54	ISI	CEDARS-SINAI MEDICAL CENTER;MEDICAL GENETICS INSTITUTE;UNIV. OF CA AT LOS ANGELES (UCLA);DAVID GEFFEN SCH. OF MED. AT UCLA;UNIVERSITY OF SOUTHERN CALIFORNIA;CEDARS-SINAI MEDICAL CENTER	NOTREPORTED;CEDARS-SINAI MEDICAL CENTER;NOTREPORTED		GOODARZI MO, 2005, DIABETES	GOODARZI MO, 2005, DIABETES
GOUNI-BERTHOLD I;GIANNAKIDOU E;MÜLLER-WIELAND D;FAUST M;KOTZKA J;BERTHOLD H;KRONE W	BLUMENTHAL RS, 2000, AM HEART J, V139, P577, DOI 10.1016/S0002-8703(00)90033-4;BOSSÉ Y, 2002, GENET MED, V4, P311, DOI 10.1097/00125817-200207000-00010;BRISSON D, 2002, PHARMACOGENETICS, V12, P313, DOI 10.1097/00008571-200206000-00007;BRZOZOWSKI AM, 1997, NATURE, V389, P753, DOI 10.1038/39645;CHINETTI G, 2000, CIRCULATION, V101, P2411, DOI 10.1161/01.CIR.101.20.2411;CHINETTI G, 1998, J BIOL CHEM,…	BACKGROUND PEROXISOME PROLIFERATOR ACTIVATED RECEPTOR ALPHA (PPARALPHA) REGULATES GENES INVOLVED IN LIPOPROTEIN METABOLISM, HEMOSTASIS, AND INFLAMMATION. IT THUS REPRESENTS A CANDIDATE GENE FOR THE RISK OF DYSLIPIDEMIA, ATHEROSCLEROSIS, AND CORONARY HEART DISEASE (CHD). NONESTERIFIED FATTY ACIDS ARE PPARALPHA LIGANDS AND THEIR LEVELS ARE INCREASED IN PATIENTS WITH DIABETES MELLITUS TYPE 2 (DM-2).…	UNIV COLOGNE, DEPT INTERNAL MED 2, COLOGNE, GERMANY.; CMMC, COLOGNE, GERMANY.; UNIV DUSSELDORF, GERMAN DIABET RES INST, D-4000 DUSSELDORF, GERMANY.; DRUG COMMISS GERMAN MED ASSOC, COLOGNE, GERMANY.;		10.1016/j.ahj.2003.12.005	ARTICLE	PROLIFERATOR-ACTIVATED RECEPTOR; LIGAND-BINDING; GENE; IDENTIFICATION; INFLAMMATION; BEZAFIBRATE; METABOLISM; MUTATION; ACIDS; RISK	AM HEART J	AM. HEART J.	ENGLISH	MOSBY-ELSEVIER	2004	GOUNI-BERTHOLD, I (CORRESPONDING AUTHOR), UNIV COLOGNE, MED KLIN & POLIKLIN INNERE MED 2, JOSEPH STELZMANN STR 9, D-50924 COLOGNE, GERMANY.	0002-8703	AMERICAN HEART JOURNAL	29	ASSOCIATION BETWEEN THE PPAR L162V POLYMORPHISM PLASMA LIPOPROTEIN LEVELS AND ATHEROSCLEROTIC DISEASE IN PATIENTS WITH DIABETES MELLITUS TYPE 2 AND IN NONDIABETIC CONTROLS	147	ISI	UNIVERSITY OF COLOGNE; UNIVERSITY OF COLOGNE; HEINRICH HEINE UNIVERSITY DUSSELDORF; DEUTSCHES DIABETES-ZENTRUM (DDZ)	UNIV COLOGNE		GOUNI-BERTHOLD I, 2004, AM HEART J	GOUNI-BERTHOLD I, 2004, AM HEART J
GRACE C;HOPEWELL J;WATKINS H;FARRALL M;GOEL A	none	TYPE 2 DIABETES (T2D) IS AN IMPORTANT HERITABLE RISK FACTOR FOR CORONARY ARTERY DISEASE (CAD), THE RISK OF BOTH DISEASES BEING INCREASED BY METABOLIC SYNDROME (MS). WITH THE AVAILABILITY OF LARGE-SCALE GENOME-WIDE ASSOCIATION DATA, WE AIMED TO ELUCIDATE THE GENETIC BURDEN OF CAD RISK IN T2D PREDISPOSED INDIVIDUALS WITHIN THE CONTEXT OF MS AND THEIR SHARED GENETIC ARCHITECTURE. MENDELIAN RANDOMIZA…	DIVISION OF CARDIOVASCULAR MEDICINE, RADCLIFFE DEPARTMENT OF MEDICINE, UNIVERSITY OF OXFORD, OXFORD, UNITED KINGDOM; WELLCOME CENTRE FOR HUMAN GENETICS, UNIVERSITY OF OXFORD, OXFORD, UNITED KINGDOM; NUFFIELD DEPARTMENT OF POPULATION HEALTH, UNIVERSITY OF OXFORD, OXFORD, UNITED KINGDOM		10.1002/gepi.22434	ARTICLE	BAYES THEOREM; CORONARY ARTERY DISEASE; DIABETES MELLITUS; TYPE 2; GENETIC PREDISPOSITION TO DISEASE; GENOME-WIDE ASSOCIATION STUDY; HUMANS; MENDELIAN RANDOMIZATION ANALYSIS; POLYMORPHISM; SINGLE NUCLEOTIDE; RISK FACTORS; GLUCOSE; HIGH DENSITY LIPOPROTEIN CHOLESTEROL; TRIACYLGLYCEROL; ABO GENE; ADULT; ARTICLE; BAYES THEOREM; BODY MASS; CAUSAL ATTRIBUTION; COHORT ANALYSIS; CONTROLLED STUDY; CORONA…	GENET EPIDEMIOL	GENET. EPIDEMIOL.	ENGLISH	JOHN WILEY AND SONS INC	2022	A. GOEL; DIVISION OF CARDIOVASCULAR MEDICINE, RADCLIFFE DEPARTMENT OF MEDICINE, UNIVERSITY OF OXFORD, OXFORD, UNITED KINGDOM; EMAIL: ANUJ.GOEL@CARDIOV.OX.AC.UK	07410395	GENETIC EPIDEMIOLOGY	2	ROBUST ESTIMATES OF HERITABLE CORONARY DISEASE RISK IN INDIVIDUALS WITH TYPE 2 DIABETES	46	ISI	UNIVERSITY OF OXFORD;UNIVERSITY OF OXFORD;UNIVERSITY OF OXFORD	NOTREPORTED;UNIVERSITY OF OXFORD;NOTREPORTED		GRACE C, 2022, GENET EPIDEMIOL	GRACE C, 2022, GENET EPIDEMIOL
GRAMMER T;RENNER W;VON K S;BOEHM B;WINKELMANN B;MAERZ W	none	THE DELETION (D) ALLELE OF THE ANGIOTENSIN-I CONVERTING ENZYME (ACE) IS ASSOCIATED WITH HIGHER ACE ACTIVITY AND HAS BEEN IMPLICATED ONLY RECENTLY IN THE PATHOGENESIS OF TYPE 2 DIABETES IN CAUCASIAN SUBJECTS. WE HAVE STUDIED THE ACE I/D POLYMORPHISM IN 1054 PATIENTS WITH TYPE 2 DIABETES AND IN 2251 INDIVIDUALS WITHOUT TYPE 2 DIABETES IN CAUCASIANS PERSONS UNDERGOING CORONARY ANGIOGRAPHY. FURTHER P…	CLINICAL INSTITUTE OF MEDICAL, CHEMICAL LABORATORY DIAGNOSTICS, MEDICAL UNIVERSITY GRAZ, AUSTRIA; DIVISION OF CLINICAL CHEMISTRY, DEPARTMENT OF MEDICINE, UNIVERSITY OF FREIBURG, GERMANY; DIVISION OF ENDOCRINOLOGY AND DIABETES, DEPARTMENT OF INTERNAL MEDICINE, UNIVERSITY OF ULM, GERMANY; CARDIOLOGY GROUP FRANKFURT-SACHSENHAUSEN, FRANKFURT, GERMANY; SYNLAB CENTER, LABORATORY DIAGNOSTICS, HEIDELBERG…	ANGIOTENSIN-I CONVERTING ENZYME; CORONARY HEART DISEASE; GENETICS; GLUCOSE; MYOCARDIAL INFARCTION; TYPE 2 DIABETES MELLITUS	10.1016/j.ymgme.2006.01.008	ARTICLE	AGED; ALLELES; CASE-CONTROL STUDIES; CORONARY ANGIOGRAPHY; CORONARY DISEASE; DIABETES MELLITUS; TYPE 2; FEMALE; GENOME; HUMAN; GENOTYPE; GLUCOSE TOLERANCE TEST; HUMANS; LEUKOCYTES; MALE; MIDDLE AGED; MYOCARDIAL INFARCTION; PEPTIDYL-DIPEPTIDASE A; POLYMORPHISM; GENETIC; ACETYLSALICYLIC ACID; ANGIOTENSIN 1 RECEPTOR ANTAGONIST; ANTILIPEMIC AGENT; ANTITHROMBOCYTIC AGENT; BETA ADRENERGIC RECEPTOR BLOC…	MOL GENET METAB	MOL. GENET. METAB.	ENGLISH		2006	W. MAERZ; SYNLAB CENTER, LABORATORY DIAGNOSTICS, HEIDELBERG, GERMANY; EMAIL: MAERZ@SYNLAB.DE	10967206	MOLECULAR GENETICS AND METABOLISM	16	THE ANGIOTENSINI CONVERTING ENZYME ID POLYMORPHISM IS NOT ASSOCIATED WITH TYPE 2 DIABETES IN INDIVIDUALS UNDERGOING CORONARY ANGIOGRAPHY THE LUDWIGSHAFEN RISK AND CARDIOVASCULAR HEALTH STUDY	88	ISI	MEDICAL UNIVERSITY GRAZ;UNIVERSITY OF FREIBURG;UNIVERSITY OF ULM;SYNLAB CENTER	NOTREPORTED;SYNLAB CENTER;EMAIL: MAERZ@SYNLAB.DE		GRAMMER TB, 2006, MOL GENET METAB	GRAMMER TB, 2006, MOL GENET METAB
GUTIERREZ-MARISCAL F;CARDELO M;DE L C S;ALCALA-DIAZ J;RONCERO-RAMOS I;GULER I;VALS-DELGADO C;LÓPEZ-MORENO A;LUQUE R;DELGADO-LISTA J;PEREZ-MARTINEZ P;YUBERO-SERRANO E;LOPEZ-MIRANDA J	none	SCOPE: IT IS HYPOTHESIZED THAT DECREASED ADVANCED GLYCATION END PRODUCTS (AGES) LEVELS COULD AFFECT TYPE 2 DIABETES MELLITUS (T2DM) REMISSION IN NEWLY DIAGNOSED PATIENTS THROUGH THE CONSUMPTION OF TWO HEALTHY DIETS. METHODS AND RESULTS: PATIENTS FROM CORDIOPREV STUDY, ALL WITH PREVIOUS CARDIOVASCULAR EVENTS, WITH T2DM AT THE BEGINNING OF THE STUDY ARE INCLUDED. PATIENTS ARE RANDOMIZED TO A MEDITE…	MAIMONINES INSTITUTE FOR BIOMEDICAL RESEARCH OF CÓRDOBA (IMIBIC), CÓRDOBA, 14004, SPAIN; HOSPITAL UNIVERSITARIO REINA SOFIA (HURS), CÓRDOBA, 14004, SPAIN; CIBER PHYSIOPATHOLOGY OF OBESITY AND NUTRITION (CIBEROBN), CARLOS III HEALTH INSTITUTE, MADRID, 28029, SPAIN; LIPIDS AND ATHEROSCLEROSIS UNIT, REINA SOFIA UNIVERSITY HOSPITAL, UNIVERSITY OF CÓRDOBA, CÓRDOBA, 14004, SPAIN; DEPARTMENT OF CELL BIO…	ADVANCED GLYCATION END PRODUCTS; MEDITERRANEAN DIET; TYPE 2 DIABETES MELLITUS	10.1002/mnfr.201901290	ARTICLE	ANTIGENS; NEOPLASM; CORONARY DISEASE; DIABETES MELLITUS; TYPE 2; DIET; FAT-RESTRICTED; DIET; MEDITERRANEAN; FEMALE; GENE EXPRESSION REGULATION; GLYCATION END PRODUCTS; ADVANCED; HUMANS; INSULIN RESISTANCE; KAPLAN-MEIER ESTIMATE; MALE; MIDDLE AGED; MITOGEN-ACTIVATED PROTEIN KINASES; PYRUVALDEHYDE; RECEPTOR FOR ADVANCED GLYCATION END PRODUCTS; TREATMENT OUTCOME; ADVANCED GLYCATION END PRODUCT; ADVA…	MOL NUTR FOOD RES	MOL. NUTR. FOOD RES.	ENGLISH	WILEY-VCH VERLAG	2021	E.M. YUBERO-SERRANO; MAIMONINES INSTITUTE FOR BIOMEDICAL RESEARCH OF CÓRDOBA (IMIBIC), CÓRDOBA, 14004, SPAIN; EMAIL: HELESE35@HOTMAIL.COM; J. LOPEZ-MIRANDA; MAIMONINES INSTITUTE FOR BIOMEDICAL RESEARCH OF CÓRDOBA (IMIBIC), CÓRDOBA, 14004, SPAIN; EMAIL: JLOPEZMIR@UCO.ES; E.M. YUBERO-SERRANO; HOSPITAL UNIVERSITARIO REINA SOFIA (HURS), CÓRDOBA, 14004, SPAIN; EMAIL: HELESE35@HOTMAIL.COM; J. LOPEZ-MIR…	16134125	MOLECULAR NUTRITION AND FOOD RESEARCH	29	REDUCTION IN CIRCULATING ADVANCED GLYCATION END PRODUCTS BY MEDITERRANEAN DIET IS ASSOCIATED WITH INCREASED LIKELIHOOD OF TYPE 2 DIABETES REMISSION IN PATIENTS WITH CORONARY HEART DISEASE FROM THE CORDIOPREV STUDY	65	ISI	MAIMONINES INSTITUTE FOR BIOMEDICAL RESEARCH OF CÓRDOBA (IMIBIC);HOSPITAL UNIVERSITARIO REINA SOFIA (HURS);CARLOS III HEALTH INSTITUTE;REINA SOFIA UNIVERSITY HOSPITAL;UNIVERSITY OF CORDOBA	NOTREPORTED;MAIMONINES INSTITUTE FOR BIOMEDICAL RESEARCH OF CÓRDOBA (IMIBIC);NOTREPORTED;NOTREPORTED;MAIMONINES INSTITUTE FOR BIOMEDICAL RESEARCH OF CÓRDOBA (IMIBIC);NOTREPORTED;NOTREPORTED;HOSPITAL UNIVERSITARIO REINA SOFIA (HURS);NOTREPORTED;NOTREPORTED;HOSPITAL UNIVERSITARIO REINA SOFIA (HURS);NOTREPORTED;NOTREPORTED;CARLOS III HEALTH INSTITUTE;NOTREPORTED;NOTREPORTED;CARLOS III HEALTH INSTITU…		GUTIERREZ-MARISCAL FM, 2021, MOL NUTR FOOD RES	GUTIERREZ-MARISCAL FM, 2021, MOL NUTR FOOD RES
HEGELE R	none	BACKGROUND - THE COMMON INSULIN RESISTANCE SYNDROME, WITH OBESITY, DYSLIPIDEMIA, HYPERGLYCEMIA, AND HYPERTENSION, IS ASSOCIATED WITH INCREASED RISK OF ATHEROSCLEROSIS. EARLY ATHEROSCLEROSIS IN RARE MONOGENIC FORMS OF INSULIN RESISTANCE, HOWEVER, HAS NOT BEEN EXTENSIVELY DOCUMENTED. CARDIOVASCULAR END POINTS WERE THUS EVALUATED IN SUBJECTS WITH DUNNIGAN-TYPE FAMILIAL PARTIAL LIPODYSTROPHY (FPLD) D…	JOHN P. ROBARTS RESEARCH INSTITUTE, LONDON, ONT., CANADA; BLACKBURN CARDIOVASC. GENET. LAB., ROBARTS RESEARCH INSTITUTE, LONDON, ONT. N6A 5K8, 406-100 PERTH DR, CANADA	DIABETES; GENETICS; OBESITY; RISK FACTORS	10.1161/01.CIR.103.18.2225	ARTICLE	ADULT; ARTICLE; ATHEROSCLEROSIS; CLINICAL ARTICLE; CONTROLLED STUDY; CORONARY ARTERY BYPASS GRAFT; DISEASE ASSOCIATION; DYSLIPIDEMIA; FEMALE; GENE MUTATION; GENOTYPE; HETEROZYGOTE; HUMAN; HYPERTENSION; INSULIN RESISTANCE; ISCHEMIC HEART DISEASE; LIPODYSTROPHY; MALE; MONOGENIC DISORDER; NON INSULIN DEPENDENT DIABETES MELLITUS; PRIORITY JOURNAL	CIRCULATION	CIRCULATION	ENGLISH	LIPPINCOTT WILLIAMS AND WILKINS	2001	R.A. HEGELE; ROBARTS RESEARCH INSTITUTE, BLACKBURN CARDIOVASC. GENETICS LAB., FRCPC, LONDON, ONT. N6A 5K8, 406-100 PERTH DR., CANADA; EMAIL: ROBERT.HEGELE@RRI.ON.CA	00097322	CIRCULATION	126	PREMATURE ATHEROSCLEROSIS ASSOCIATED WITH MONOGENIC INSULIN RESISTANCE	103	ISI	JOHN P. ROBARTS RESEARCH INSTITUTE;ROBARTS RESEARCH INSTITUTE	NOTREPORTED;ROBARTS RESEARCH INSTITUTE;NOTREPORTED		HEGELE RA, 2001, CIRCULATION	HEGELE RA, 2001, CIRCULATION
HELKKULA P;KIISKINEN T;HAVULINNA A;KARJALAINEN J;KOSKINEN S;SALOMAA V;DALY M;PALOTIE A;SURAKKA I;RIPATTI S	none	PROTEIN-TRUNCATING VARIANTS (PTVS) AFFECTING DYSLIPIDEMIA RISK MAY POINT TO THERAPEUTIC TARGETS FOR CARDIOMETABOLIC DISEASE. OUR OBJECTIVE WAS TO IDENTIFY PTVS THAT WERE ASSOCIATED WITH BOTH LIPID LEVELS AND THE RISK OF CORONARY ARTERY DISEASE (CAD) OR TYPE 2 DIABETES (T2D) AND ASSESS THEIR POSSIBLE ASSOCIATIONS WITH RISKS OF OTHER DISEASES. TO ACHIEVE THIS AIM, WE LEVERAGED THE ENRICHMENT OF PTV…	INSTITUTE FOR MOLECULAR MEDICINE FINLAND (FIMM), HILIFE, UNIVERSITY OF HELSINKI, HELSINKI, FINLAND; FINNISH INSTITUTE FOR HEALTH AND WELFARE, HELSINKI, FINLAND; ANALYTIC AND TRANSLATIONAL GENETICS UNIT, MASSACHUSETTS GENERAL HOSPITAL, HARVARD MEDICAL SCHOOL, BOSTON, MA, UNITED STATES; BROAD INSTITUTE OF THE MASSACHUSETTS INSTITUTE OF TECHNOLOGY, HARVARD UNIVERSITY, CAMBRIDGE, MA, UNITED STATES; P…		10.1371/journal.pgen.1009501	ARTICLE	AGED; ANGIOPOIETIN-LIKE PROTEINS; CORONARY ARTERY DISEASE; DIABETES MELLITUS; TYPE 2; DYSLIPIDEMIAS; FEMALE; GENETIC PREDISPOSITION TO DISEASE; HUMANS; HYDROXYMETHYLGLUTARYL-COA REDUCTASE INHIBITORS; MALE; MIDDLE AGED; PEPTIDE HORMONES; POLYMORPHISM; SINGLE NUCLEOTIDE; RISK FACTORS; TRIGLYCERIDES; ANGIOPOIETIN RELATED PROTEIN 4; CHOLESTEROL ESTER TRANSFER PROTEIN; HIGH DENSITY LIPOPROTEIN CHOLEST…	PLOS GENET	PLOS GENET.	ENGLISH	PUBLIC LIBRARY OF SCIENCE	2021	S. RIPATTI; INSTITUTE FOR MOLECULAR MEDICINE FINLAND (FIMM), HILIFE, UNIVERSITY OF HELSINKI, HELSINKI, FINLAND; EMAIL: SAMULI.RIPATTI@HELSINKI.FI	15537390	PLOS GENETICS	22	ANGPTL8 PROTEINTRUNCATING VARIANT ASSOCIATED WITH LOWER SERUM TRIGLYCERIDES AND RISK OF CORONARY DISEASE	17	ISI	UNIVERSITY OF HELSINKI;FINNISH INSTITUTE FOR HEALTH AND WELFARE;HARVARD MEDICAL SCHOOL;HARVARD UNIVERSITY;MASSACHUSETTS GENERAL HOSPITAL;UNIVERSITY OF MICHIGAN;UNIVERSITY OF HELSINKI	NOTREPORTED;UNIVERSITY OF HELSINKI;NOTREPORTED		HELKKULA P, 2021, PLOS GENET	HELKKULA P, 2021, PLOS GENET
HEMEED R;AL-TU'MA F;AL-KOOFEE D;AL-MAYALI A	none	BACKGROUND: INSERTION DELETION (I/D) POLYMORPHISM (RS4646994) IN THE ANGIOTENSIN-CONVERTING ENZYME (ACE) HAS A SUBSTANTIAL EFFECT ON CORONARY HEART DISEASE (CHD). THE AMPLIFICATION OF AN ALU REPETITIVE ELEMENT IN AN INTRON OF THE ACE HAS SHOWN THREE POTENTIAL GENOTYPES OF I/I AND D/D AS HOMOZYGOUS, AND I/D AS HETEROZYGOUS. OBJECTIVE: THE OBJECTIVE OF THIS STUDY WAS TO INVESTIGATE THE ASSOCIATION …	DEPARTMENT OF BIOCHEMISTRY, COLLEGE OF MEDICINE, UNIVERSITY OF KERBALA, KERBALA, IRAQ; DEPARTMENT OF CLINICAL LABORATORY SCIENCE, FACULTY OF PHARMACY, UNIVERSITY OF KUFA, NAJAF, IRAQ; DEPARTMENT OF INTERNAL MEDICINE, COLLEGE OF MEDICINE, UNIVERSITY OF KERBALA, KERBALA, IRAQ	ANGIOTENSIN CONVERTING ENZYME; CORONARY HEART DISEASE; ISCHEMIC HEART DISEASE; TYPE 2 DIABETES MELLITUS	10.1007/s40200-020-00632-y	ARTICLE	ACE GENE; ADULT; ALLELE; ARTICLE; BLOOD SAMPLING; CARDIOVASCULAR RISK FACTOR; CONTROLLED STUDY; CROSS-SECTIONAL STUDY; GENE; GENE IDENTIFICATION; GENETIC ANALYSIS; GENETIC ASSOCIATION; GENETIC POLYMORPHISM; GENOTYPE; HUMAN; IRAQI; ISCHEMIC HEART DISEASE; MAJOR CLINICAL STUDY; MALE; NON INSULIN DEPENDENT DIABETES MELLITUS; POLYMERASE CHAIN REACTION; RISK ASSESSMENT; RISK FACTOR; SEX DIFFERENCE	J DIABETES METABOLIC DISORD	J. DIABETES METABOLIC DISORD.	ENGLISH	SPRINGER SCIENCE AND BUSINESS MEDIA DEUTSCHLAND GMBH	2020	D.A.F. AL-KOOFEE; DEPARTMENT OF CLINICAL LABORATORY SCIENCE, FACULTY OF PHARMACY, UNIVERSITY OF KUFA, NAJAF, IRAQ; EMAIL: DHAFERA.FAISAL@UOKUFA.EDU.IQ	22516581	JOURNAL OF DIABETES AND METABOLIC DISORDERS	4	RELATIONSHIP OF ANGIOTENSIN CONVERTING ENZYME ID POLYMORPHISM RS4646994 AND CORONARY HEART DISEASE AMONG A MALE IRAQI POPULATION WITH TYPE 2 DIABETES MELLITUS	19	ISI	UNIVERSITY OF KERBALA;UNIVERSITY OF KUFA;UNIVERSITY OF KERBALA	NOTREPORTED;UNIVERSITY OF KUFA;NOTREPORTED		HEMEED RN, 2020, J DIABETES METABOLIC DISORD	HEMEED RN, 2020, J DIABETES METABOLIC DISORD
HEMEED R;AL-TU'MA F;AL-KOOFEE D;AL-MAYALI A;GHASEMIAN A	none	INSERTION DELETION (I/D) POLYMORPHISM (RS4646994) IN THE ANGIOTENSIN-CONVERTING ENZYME (ACE) HAS A SUBSTANTIAL EFFECT ON CORAÔNARY HEART DISEASE (CHD). THE OBJECTIVE OF THIS STUDY WAS TO INVESTIGATE THE ASSOCIATION BETWEEN THE ACE GENE POLYMORPHISM AND CHD IN IRAQI PATIENTS WITH AND WITHOUT TYPE-2 DIABETES MELLITUS (T2DM). THE AMPLIFICATION OF AN ALU REPETITIVE ELEMENT IN AN INTRON OF THE ACE HAS…	DEPARTMENT OF BIOCHEMISTRY, COLLEGE OF MEDICINE, UNIVERSITY OF KERBALA, IRAQ; DEPARTMENT OF CLINICAL LABORATORY SCIENCE, FACULTY OF PHARMACY, UNIVERSITY OF KUFA, NAJAF, IRAQ; DEPARTMENT OF INTERNAL MEDICINE, COLLEGE OF MEDICINE, UNIVERSITY OF KERBALA, IRAQ	ANGIOTENSIN CONVERTING ENZYME; CORONARY HEART DISEASE; ISCHEMIC HEART DISEASE 2 DIABETES MELLITUS	10.46389/rjd-2020-1054	ARTICLE	DIPEPTIDYL CARBOXYPEPTIDASE; HIGH DENSITY LIPOPROTEIN CHOLESTEROL; LOW DENSITY LIPOPROTEIN CHOLESTEROL; VERY LOW DENSITY LIPOPROTEIN CHOLESTEROL; ADULT; ALU REPEAT; ARTICLE; CASE CONTROL STUDY; COMPARATIVE STUDY; CONTROLLED STUDY; DISEASE ASSOCIATION; EXTRACTION; FEMALE; GENE AMPLIFICATION; GENE FREQUENCY; GENOTYPE; HEART INFARCTION; HUMAN; IRAQI; ISCHEMIC HEART DISEASE; MAJOR CLINICAL STUDY; MAL…	ROM J DIABETES NUTR METAB DIS	ROM. J. DIABETES NUTR. METAB. DIS.	ENGLISH	ROMANIAN SOCIETY OF DIABETES, NUTRITION AND METABOLIC DISEASES	2020	D.A.F. AL-KOOFEE; DEPARTMENT OF CLINICAL LABORATORY SCIENCE, FACULTY OF PHARMACY, UNIVERSITY OF KUFA, NAJAF, IRAQ; EMAIL: DHAFERA.FAISAL@UOKUFA.EDU	15838609	ROMANIAN JOURNAL OF DIABETES, NUTRITION AND METABOLIC DISEASES	0	RELATIONSHIP OF ANGIOTENSIN CONVERTING ENZYME ID POLYMORPHISM RS4646994 AND ISCHEMIC HEART DISEASE IN IRAQI PATIENTS WITH TYPE 2 DIABETES MELLITUS	27	ISI	UNIVERSITY OF KERBALA;UNIVERSITY OF KUFA;UNIVERSITY OF KERBALA	NOTREPORTED;UNIVERSITY OF KUFA;NOTREPORTED		HEMEED RN, 2020, ROM J DIABETES NUTR METAB DIS	HEMEED RN, 2020, ROM J DIABETES NUTR METAB DIS
HERMANS M;AHN S;ROUSSEAU M	none	BACKGROUND: THIS STUDY INVESTIGATED THE ISOLATED AND CROSSED EFFECTS OF FAMILIAL HISTORIES (FH) OF EARLY ONSET CORONARY HEART DISEASE (EOCHD) AND TYPE 2 DIABETES MELLITUS (T2DM) ON DIABETIC OFFSPRING. METHODS: THE CARDIOMETABOLIC PHENOTYPE OF 1098 T2DM PATIENTS WAS ANALYZED ACCORDING TO AN FH OF T2DM AND/OR EOCHD, INCLUDING BODY COMPOSITION, FASTING INSULINEMIA, INSULIN SENSITIVITY, Β-CELL FUNCTI…	DIVISION OF ENDOCRINOLOGY & NUTRITION, ST-LUC UNIVERSITY CLINICS AND INSTITUTE FOR EXPERIMENTAL AND CLINICAL RESEARCH, UNIVERSITÉ CATHOLIQUE DE LOUVAIN, BRUSSELS, BELGIUM; DIVISION OF CARDIOLOGY, ST-LUC UNIVERSITY CLINICS AND CARDIOVASCULAR RESEARCH CENTER, INSTITUTE OF EXPERIMENTAL AND CLINICAL RESEARCH, UNIVERSITÉ CATHOLIQUE DE LOUVAIN, BRUSSELS, BELGIUM	CORONARY ARTERY DISEASE; FAMILY HISTORY; INSULINEMIA; LIPOPROTEIN(A); TYPE 2 DIABETES MELLITUS	10.1111/1753-0407.12840	ARTICLE	AGED; CARDIOVASCULAR DISEASES; CHOLESTEROL; HDL; CROSS-SECTIONAL STUDIES; DIABETES MELLITUS; TYPE 2; DIABETIC ANGIOPATHIES; FAMILY HEALTH; FEMALE; GENETIC PREDISPOSITION TO DISEASE; HUMANS; INSULIN RESISTANCE; MALE; MIDDLE AGED; ACETYLSALICYLIC ACID; ANTIHYPERTENSIVE AGENT; DIPEPTIDYL PEPTIDASE IV INHIBITOR; EZETIMIBE; FIBRIC ACID DERIVATIVE; GLITAZONE DERIVATIVE; GLUCAGON LIKE PEPTIDE 1 RECEPTOR…	J DIABETES	J. DIABETES	ENGLISH	JOHN WILEY AND SONS INC.	2019	M.P. HERMANS; DIVISION OF ENDOCRINOLOGY & NUTRITION, ST-LUC UNIVERSITY CLINICS AND INSTITUTE FOR EXPERIMENTAL AND CLINICAL RESEARCH, UNIVERSITÉ CATHOLIQUE DE LOUVAIN, BRUSSELS, BELGIUM; EMAIL: MICHEL.HERMANS@UCLOUVAIN.BE	17530393	JOURNAL OF DIABETES	4	CROSSING FAMILY HISTORIES OF DIABETES AND CARDIOVASCULAR DISEASE LEADS TO UNEXPECTED OUTCOMES IN DIABETIC OFFSPRING	11	ISI	ST-LUC UNIVERSITY CLINICS AND INSTITUTE FOR EXPERIMENTAL AND CLINICAL RESEARCH;ST-LUC UNIVERSITY CLINICS AND CARDIOVASCULAR RESEARCH CENTER	NOTREPORTED;ST-LUC UNIVERSITY CLINICS AND INSTITUTE FOR EXPERIMENTAL AND CLINICAL RESEARCH;NOTREPORTED		HERMANS MP, 2019, J DIABETES	HERMANS MP, 2019, J DIABETES
HO J;GERMER S;TAM C;SO W;MARTIN M;MA R;CHAN J;NG M	ALBERTI KGMM, 1998, DIABETIC MED, V15, P539, DOI 10.1002/(SICI)1096-9136(199807)15:7<539::AID-DIA668>3.0.CO;2-S;ALEXANDER CM, 2003, DIABETES, V52, P1210, DOI 10.2337/DIABETES.52.5.1210;BARRETT JC, 2005, BIOINFORMATICS, V21, P263, DOI 10.1093/BIOINFORMATICS/BTH457;BLÜHER M, 2003, DIABETES CARE, V26, P825, DOI 10.2337/DIACARE.26.3.825;BURTON PR, 2007, NATURE, V447, P661, DOI 10.1038/NATURE05911;CHE…	AIMS: WE EXAMINED THE RISK ASSOCIATION BETWEEN SINGLE NUCLEOTIDE POLYMORPHISMS (SNPS) IN ELEVEN CANDIDATE GENES WITH TYPE 2 DIABETES (T2D). T2D-ASSOCIATED POLYMORPHISMS WERE ALSO EXAMINED FOR PREDICTION OF INCIDENT CHD. METHODS: 113 TAGGING SNPS WERE GENOTYPED IN STAGE 1 (467 T2D CASES, 290 CONTROLS), AND 15 SNPS WERE ANALYZED IN THE FINAL COHORT (1462 T2D CASES, 600 CONTROLS). THREE T2D-ASSOCIAT…	CHINESE UNIV HONG KONG, PRINCE WALES HOSP, DEPT MED & THERAPEUT, SHATIN, HONG KONG, PEOPLES R CHINA.; CHINESE UNIV HONG KONG, PRINCE WALES HOSP, LI KA SHING INST HLTH SCI, SHATIN, HONG KONG, PEOPLES R CHINA.; CHINESE UNIV HONG KONG, PRINCE WALES HOSP, HONG KONG INST DIABET & OBES, SHATIN, HONG KONG, PEOPLES R CHINA.; ROCHE PHARMA RES & EARLY DEV, TRANSLAT RES SCI, NUTLEY, NJ USA.;	TYPE 2 DIABETES; CORONARY HEART DISEASE; POLYMORPHISMS; PRO12ALA	10.1016/j.diabres.2012.03.012	ARTICLE	GENOME-WIDE ASSOCIATION; PROLIFERATOR-ACTIVATED RECEPTOR-GAMMA-2; NUCLEAR FACTOR 4-ALPHA; SUSCEPTIBILITY LOCI; GENETIC-VARIANTS; ARTERY-DISEASE; HAN POPULATION; RISK; METAANALYSIS; PROMOTER	DIABETES RES CLIN PR	DIABETES RES. CLIN. PRACT.	ENGLISH	ELSEVIER IRELAND LTD	2012	CHAN, JCN (CORRESPONDING AUTHOR), CHINESE UNIV HONG KONG, PRINCE WALES HOSP, DEPT MED & THERAPEUT, SHATIN, HONG KONG, PEOPLES R CHINA.	0168-8227	DIABETES RESEARCH AND CLINICAL PRACTICE	24	ASSOCIATION OF THE IPPARGI PRO12ALA POLYMORPHISM WITH TYPE 2 DIABETES AND INCIDENT CORONARY HEART DISEASE IN A HONG KONG CHINESE POPULATION	97	ISI	CHINESE UNIVERSITY OF HONG KONG; PRINCE OF WALES HOSPITAL; CHINESE UNIVERSITY OF HONG KONG; PRINCE OF WALES HOSPITAL; CHINESE UNIVERSITY OF HONG KONG; PRINCE OF WALES HOSPITAL	CHINESE UNIV HONG KONG		HO JSK, 2012, DIABETES RES CLIN PR	HO JSK, 2012, DIABETES RES CLIN PR
HUANG M;LAINA-NICAISE L;ZHA L;TANG T;CHENG X	none	OBJECTIVE: WE AIMED TO EVALUATE THE CAUSAL EFFECT OF TYPE 2 DIABETES MELLITUS (T2DM) AND GLYCEMIC TRAITS ON THE RISK OF A WIDE RANGE OF CARDIOVASCULAR DISEASES (CVDS) AND LIPID TRAITS USING MENDELIAN RANDOMIZATION (MR). METHODS: GENETIC VARIANTS ASSOCIATED WITH T2DM, FASTING GLUCOSE, FASTING INSULIN, AND HEMOGLOBIN A1C WERE SELECTED AS INSTRUMENTAL VARIABLES TO PERFORM BOTH UNIVARIABLE AND MULTIV…	DEPARTMENT OF CARDIOLOGY, UNION HOSPITAL, TONGJI MEDICAL COLLEGE, HUAZHONG UNIVERSITY OF SCIENCE AND TECHNOLOGY, WUHAN, CHINA; KEY LABORATORY OF BIOLOGICAL TARGETED THERAPY OF THE MINISTRY OF EDUCATION, UNION HOSPITAL, TONGJI MEDICAL COLLEGE, HUAZHONG UNIVERSITY OF SCIENCE AND TECHNOLOGY, WUHAN, CHINA	CARDIOVASCULAR DISEASE; DIABETES; GLYCEMIC TRAITS; LIPID; MENDELIAN RANDOMIZATION	10.3389/fendo.2022.840579	ARTICLE	APOLIPOPROTEIN; HEMOGLOBIN A1C; HIGH DENSITY LIPOPROTEIN CHOLESTEROL; TRIACYLGLYCEROL; ARTICLE; CARDIOVASCULAR DISEASE; CORONARY ANGIOGRAPHY; CORONARY ARTERY ATHEROSCLEROSIS; DYSLIPIDEMIA; ESSENTIAL HYPERTENSION; EUROPEAN; GENE REPLICATION; GLUCOSE BLOOD LEVEL; GLYCEMIC INDEX; HEART DISEASE RISK FACTOR; HEART FAILURE; HEART INFARCTION; HUMAN; INSTRUMENTAL VARIABLE ANALYSIS; INSULIN BLOOD LEVEL; I…	FRONT ENDOCRINOL	FRONT. ENDOCRINOL.	ENGLISH	FRONTIERS MEDIA S.A.	2022	T. TANG; DEPARTMENT OF CARDIOLOGY, UNION HOSPITAL, TONGJI MEDICAL COLLEGE, HUAZHONG UNIVERSITY OF SCIENCE AND TECHNOLOGY, WUHAN, CHINA; EMAIL: TANGTINGTING@HUST.EDU.CN; X. CHENG; DEPARTMENT OF CARDIOLOGY, UNION HOSPITAL, TONGJI MEDICAL COLLEGE, HUAZHONG UNIVERSITY OF SCIENCE AND TECHNOLOGY, WUHAN, CHINA; EMAIL: NATHANCX@HUST.EDU.CN	16642392	FRONTIERS IN ENDOCRINOLOGY	9	CAUSAL ASSOCIATION OF TYPE 2 DIABETES MELLITUS AND GLYCEMIC TRAITS WITH CARDIOVASCULAR DISEASES AND LIPID TRAITS A MENDELIAN RANDOMIZATION STUDY	13	ISI	HUAZHONG UNIVERSITY OF SCIENCE AND TECHNOLOGY;HUAZHONG UNIVERSITY OF SCIENCE AND TECHNOLOGY	NOTREPORTED;HUAZHONG UNIVERSITY OF SCIENCE AND TECHNOLOGY;NOTREPORTED;NOTREPORTED;HUAZHONG UNIVERSITY OF SCIENCE AND TECHNOLOGY;NOTREPORTED		HUANG M, 2022, FRONT ENDOCRINOL	HUANG M, 2022, FRONT ENDOCRINOL
HUANG X;RANTALAIHO V;WIRTA O;PASTERNACK A;KOIVULA T;HILTUNEN T;NIKKARI T;LEHTIMÄKI T	none	THE INSERTION/DELETION (I/D) POLYMORPHISM OF THE HUMAN ANGIOTENSIN- CONVERTING ENZYME (ACE) GENE IS A MAJOR DETERMINANT OF CIRCULATING ACE LEVELS. RECENT STUDIES HAVE FOUND THE ACE D ALLELE TO BE ASSOCIATED WITH AN INCREASED RISK FOR CORONARY HEART DISEASE (CHD) IN DIABETIC AND NONDIABETIC SUBJECTS. THIS ASSOCIATION HAS NOT BEEN EVALUATED IN PROSPECTIVE STUDIES. WE THEREFORE STUDIED THE RELATIONS…	DEPTS. OF CLIN. CHEM. AND INT. MED., TAMPERE UNIVERSITY HOSPITAL, MEDICAL SCHOOL OF TAMPERE UNIVERSITY, TAMPERE, FINLAND; TAMPERE UNIVERSITY HOSPITAL, DEPARTMENT OF CLINICAL CHEMISTRY, FIN-33521, TAMPERE, PO BOX 2000, FINLAND		10.1016/S0026-0495(98)90333-X	ARTICLE	DIPEPTIDYL CARBOXYPEPTIDASE; ADULT; ARTICLE; CONTROLLED STUDY; CORONARY RISK; ENZYME POLYMORPHISM; FEMALE; GENE DELETION; GENE INSERTION; GENETIC POLYMORPHISM; HUMAN; ISCHEMIC HEART DISEASE; MAJOR CLINICAL STUDY; MALE; NON INSULIN DEPENDENT DIABETES MELLITUS; POLYMERASE CHAIN REACTION; PRIORITY JOURNAL	METAB CLIN EXP	METAB. CLIN. EXP.	ENGLISH	W.B. SAUNDERS	1998		00260495	METABOLISM: CLINICAL AND EXPERIMENTAL	18	ANGIOTENSINCONVERTING ENZYME GENE POLYMORPHISM IS ASSOCIATED WITH CORONARY HEART DISEASE IN NONINSULINDEPENDENT DIABETIC PATIENTS EVALUATED FOR 9 YEARS	47	ISI	TAMPERE UNIVERSITY HOSPITAL;TAMPERE UNIVERSITY HOSPITAL	TAMPERE UNIVERSITY HOSPITAL;TAMPERE UNIVERSITY HOSPITAL		HUANG XH, 1998, METAB CLIN EXP	HUANG XH, 1998, METAB CLIN EXP
HUGHES R;AITMAN T	none	INSULIN RESISTANCE (IR) IS A KEY FEATURE OF SEVERAL MAJOR RISK FACTORS FOR CORONARY HEART DISEASE, INCLUDING TYPE 2 DIABETES, ESSENTIAL HYPERTENSION, COMBINED HYPERLIPIDAEMIA AND OBESITY. THESE CORONARY RISK FACTORS HAVE BEEN BROUGHT TOGETHER UNDER THE TERM “METABOLIC SYNDROME”. DESPITE THEIR HIGH PREVALENCE IN WESTERN POPULATIONS, THE MOLECULAR BASIS OF THESE RISK FACTORS, AND THEIR PATHOGENIC R…	DEPARTMENT OF EXPERIMENTAL MEDICINE TOXICOLOGY, IMPERIAL COLLEGE LONDON (ICL), HAMMERSMITH CAMPUS, DUCANE RD, LONDON W12 ONN, UNITED KINGDOM; PHYSIOLOGICAL GENOMICS MEDICINE GROUP, MRC CLINICAL SCIENCES CENTRE, FACULTY OF MEDICINE, ICL, UNITED KINGDOM	ATHEROGENESIS; CD36; INSULIN RESISTANCE; METABOLIC SYNDROME; THIAZOLIDINEDIONE	10.1016/j.ics.2003.12.005	ARTICLE		INT CONGR SER	INT. CONGR. SER.	ENGLISH		2004		05315131	INTERNATIONAL CONGRESS SERIES	4	GENETICS OF THE METABOLIC SYNDROME AND IMPLICATIONS FOR THERAPY	1262	ISI	IMPERIAL COLLEGE LONDON (ICL);MRC CLINICAL SCIENCES CENTRE	IMPERIAL COLLEGE LONDON (ICL);MRC CLINICAL SCIENCES CENTRE		HUGHES RI, 2004, INT CONGR SER	HUGHES RI, 2004, INT CONGR SER
IRELAND H;KONSTANTOULAS C;COOPER J;HAWE E;HUMPHRIES S;MATHER H;GOODALL A;HOGWOOD J;JUHAN-VAGUE I;YUDKIN J;DI M G;MARGAGLIONE M;HAMSTEN A;MILLER G;BAUER K;KIM Y;STEARNS-KUROSAWA D;KUROSAWA S	none	WE HAVE PROGRESSIVELY ANALYSED THREE STUDIES OF CORONARY HEART DISEASE (CHD) FOR A VARIANT IN EPCR (SER219GLY). INITIALLY, IN A PROSPECTIVE STUDY, NPHSII, WHILE NO OVERALL CHD-RISK WAS IDENTIFIED IN HETEROZYGOTES, HOMOZYGOTES FOR 219GLY EXHIBITED A THREE-FOLD ELEVATED RISK (HR 3.3, CI 1.22-8.96). IN DIABETICS WITHIN NPHSII, THERE WAS A SUGGESTION THAT 219GLY+ WAS ASSOCIATED WITH ELEVATED CHD-RISK…	CARDIOVASCULAR GENETICS, DEPARTMENT MEDICINE, UNIVERSITY COLLEGE LONDON, LONDON, WC1E 6JF, 5 UNIVERSITY ST., UNITED KINGDOM; DEPARTMENT MEDICINE, EALING HOSPITAL, LONDON, UNITED KINGDOM; DEPARTMENT OF CARDIOVASCULAR SCIENCES, UNIVERSITY OF LEICESTER, LEICESTER, UNITED KINGDOM; LABORATOIRE D'HÉMATOLOGIE, CHU TIMOINE, MARSEILLE, FRANCE; DIABETES AND CARDIOVASCULAR DISEASE ACADEMIC UNIT, DEPARTMENT …	ENDOTHELIAL PROTEIN C RECEPTOR; HEART DISEASE; THROMBIN	10.1016/j.atherosclerosis.2005.02.028	ARTICLE	ANIMALS; ANTIGENS; ANTIGENS; CD; BLOOD COAGULATION FACTORS; CORONARY DISEASE; CRICETINAE; CROSS-SECTIONAL STUDIES; DIABETES MELLITUS; TYPE 2; DNA; ENDOTHELIUM; VASCULAR; FEMALE; FLOW CYTOMETRY; FOLLOW-UP STUDIES; GENE EXPRESSION; GENOTYPE; GLYCOPROTEINS; HUMANS; IMMUNOASSAY; MALE; MIDDLE AGED; PEPTIDE FRAGMENTS; PROGNOSIS; PROSPECTIVE STUDIES; PROTHROMBIN; RECEPTORS; CELL SURFACE; RISK FACTORS; T…	ATHEROSCLEROSIS	ATHEROSCLEROSIS	ENGLISH		2005	H. IRELAND; CARDIOVASCULAR GENETICS, DEPARTMENT MEDICINE, UNIVERSITY COLLEGE LONDON, LONDON, WC1E 6JF, 5 UNIVERSITY ST., UNITED KINGDOM; EMAIL: H.IRELAND@UCL.AC.UK	00219150	ATHEROSCLEROSIS	54	EPCR SER219GLY ELEVATED SEPCR PROTHROMBIN F12 RISK FOR CORONARY HEART DISEASE AND INCREASED SEPCR SHEDDING IN VITRO	183	ISI	UNIVERSITY COLLEGE LONDON;EALING HOSPITAL;UNIVERSITY OF LEICESTER;LABORATOIRE D'HÉMATOLOGIE;DIABETES AND CARDIOVASCULAR DISEASE ACADEMIC UNIT;ISTITUTO DI RICOVERO E CURA A CARATTERE SCIENTIFICO (IRCCS);KING GUSTAF V RESEARCH INSTITUTE;WOLFSON INSTITUTE OF PREVENTIVE MEDICINE;HARVARD MEDICAL SCHOOL;OKLAHOMA MEDICAL RESEARCH FOUNDATION (OMRF)	NOTREPORTED;UNIVERSITY COLLEGE LONDON;NOTREPORTED		IRELAND H, 2005, ATHEROSCLEROSIS	IRELAND H, 2005, ATHEROSCLEROSIS
JAMES R;LEVIEV I;RUIZ J;PASSA P;FROGUEL P;GARIN M	none	THE SERUM ENZYME PARAOXONASE (PON) PROTECTS LDLS FROM OXIDATIVE STRESS. WE RECENTLY IDENTIFIED PROMOTER POLYMORPHISMS OF THE PON GENE THAT STRONGLY AFFECT GENE EXPRESSION AND SERUM LEVELS OF THE ENZYME. THE PRESENT STUDY TESTED THE HYPOTHESIS THAT PROMOTER POLYMORPHISM T(-107)C COULD BE A RISK FACTOR FOR VASCULAR DISEASE IN TYPE 2 DIABETIC PATIENTS BY VIRTUE OF ITS ABILITY TO MODULATE SERUM CONCE…	CLINICAL DIABETES UNIT, DIV. OF ENDOCRINOLOGY AND DIABETES, UNIVERSITY HOSPITAL, 1211 GENEVA 14, 24 RUE MICHELI-DU-CREST, SWITZERLAND		10.2337/diabetes.49.8.1390	ARTICLE	ARYLDIALKYLPHOSPHATASE; GENE PRODUCT; HIGH DENSITY LIPOPROTEIN; LOW DENSITY LIPOPROTEIN; ADULT; AGED; ALLELE; ARTICLE; DIABETIC ANGIOPATHY; FEMALE; GENETIC POLYMORPHISM; GENOTYPE; HUMAN; ISCHEMIC HEART DISEASE; MAJOR CLINICAL STUDY; MALE; NON INSULIN DEPENDENT DIABETES MELLITUS; OXIDATIVE STRESS; PRIORITY JOURNAL; PROMOTER REGION; PROTEIN EXPRESSION; RISK FACTOR	DIABETES	DIABETES	ENGLISH	AMERICAN DIABETES ASSOCIATION INC.	2000	R.W. JAMES; CLINICAL DIABETES UNIT, DIV. OF ENDOCRINOLOGY AND DIABETES, UNIVERSITY HOSPITAL, 1211 GENEVA 14, 24 RUE MICHELI-DU-CREST, SWITZERLAND; EMAIL: RICHARD.JAMES@HCUGE.CH	00121797	DIABETES	122	PROMOTER POLYMORPHISM T107C OF THE PARAOXONASE PON1 GENE IS A RISK FACTOR FOR CORONARY HEART DISEASE IN TYPE 2 DIABETIC PATIENTS	49	ISI	UNIVERSITY HOSPITAL	NOTREPORTED;UNIVERSITY HOSPITAL;NOTREPORTED		JAMES RW, 2000, DIABETES	JAMES RW, 2000, DIABETES
JARVIS M;PALMER B;PILBROW A;ELLIS K;FRAMPTON C;SKELTON L;DOUGHTY R;WHALLEY G;ELLIS C;YANDLE T;RICHARDS A;CAMERON V	none	THE CYP1A1 T6235C POLYMORPHISM (RS4646903) GENE POLYMORPHISM HAS BEEN LINKED TO THE DEVELOPMENT OF CORONARY HEART DISEASE AND CIGARETTE SMOKING-RELATED LUNG CANCER. THE PRESENT STUDY INVESTIGATED ASSOCIATIONS BETWEEN SURVIVAL IN ACUTE CORONARY SYNDROMES (ACS), SMOKING AND THE CYP1A1 T6235C POLYMORPHISM. 2. PATIENTS WITH ACS (N = 1251) WERE GENOTYPED FOR THE CYP1A1 T6235C POLYMORPHISM. PATIENTS HA…	DEPARTMENT OF MEDICINE, UNIVERSITY OF OTAGO, CHRISTCHURCH, CHRISTCHURCH 8140, PO BOX 4345, NEW ZEALAND; DEPARTMENT OF MEDICINE, FACULTY OF MEDICINE AND HEALTH SCIENCES, UNIVERSITY OF AUCKLAND, AUCKLAND, NEW ZEALAND	CORONARY ARTERY DISEASE; CYP1A1; GENE-ENVIRONMENT INTERACTION; GENETICS; SMOKING	10.1111/j.1440-1681.2009.05261.x	ARTICLE	ACUTE CORONARY SYNDROME; AGED; BODY MASS INDEX; CYTOCHROME P-450 CYP1A1; DIABETES MELLITUS; TYPE 2; FEMALE; HUMANS; MALE; MIDDLE AGED; POLYMORPHISM; GENETIC; PROGNOSIS; SMOKING; CYTOCHROME P450 1A1; ACUTE CORONARY SYNDROME; ADULT; AGED; ARTICLE; BODY MASS; CONTROLLED STUDY; DISEASE ASSOCIATION; ETHNICITY; FEMALE; GENE FREQUENCY; GENETIC ASSOCIATION; GENETIC POLYMORPHISM; GENOTYPE; HUMAN; MAJOR CL…	CLIN EXP PHARMACOL PHYSIOL	CLIN. EXP. PHARMACOL. PHYSIOL.	ENGLISH		2010	V. A. CAMERON; DEPARTMENT OF MEDICINE, UNIVERSITY OF OTAGO, CHRISTCHURCH, CHRISTCHURCH 8140, PO BOX 4345, NEW ZEALAND; EMAIL: VICKY.CAMERON@OTAGO.AC.NZ	14401681	CLINICAL AND EXPERIMENTAL PHARMACOLOGY AND PHYSIOLOGY	10	CYP1A1 MSPI T6235C GENE POLYMORPHISM IS ASSOCIATED WITH MORTALITY IN ACUTE CORONARY SYNDROME PATIENTS	37	ISI	UNIVERSITY OF OTAGO;UNIVERSITY OF AUCKLAND	NOTREPORTED;UNIVERSITY OF OTAGO;NOTREPORTED		JARVIS MD, 2010, CLIN EXP PHARMACOL PHYSIOL	JARVIS MD, 2010, CLIN EXP PHARMACOL PHYSIOL
JASTRZEBSKA M;LISMAN D;SZELEPAJLO A;OLEDZKI S;CHELSTOWSKI K;CLARK J;SIENNICKA A	none	ANTIPLATELET THERAPY RESISTANCE AGAINST ACETYLSALICYLIC ACID (ASA) AND/OR CLOPIDOGREL IN CORONARY HEART DISEASE (CHD) IS COMMON WITH DIABETES MELLITUS. ONE FACTOR MIGHT INVOLVE PLATELET RECEPTOR ITGB3 GENE POLYMORPHISM. WE AIMED TO ASSESS RESISTANCE TOGETHER WITH PLATELET REACTIVITY PARAMETERS, THE POLYMORPHISM, PLUS DIABETES TYPE 2 COEXISTENCE. THE STUDY INCLUDED 185 PATIENTS WITH CHD, INCLUDING…	DEPARTMENT OF LABORATORY DIAGNOSTICS, POMERANIAN MEDICAL UNIVERSITY, SZCZECIN, POLAND; DEPARTMENT OF CARDIOLOGY, POMERANIAN MEDICAL UNIVERSITY, SZCZECIN, POLAND	ASPIRIN RESISTANCE; CLOPIDOGREL RESISTANCE; CORONARY ARTERY DISEASE; DIABETES; FIBRINOGEN; GLYCOPROTEIN IIIA; ITGB3 GENE POLYMORPHISM; PLATELET AGGREGATION; THROMBOXANE B2	10.26402/jpp.2019.2.01	ARTICLE	BLOOD PLATELETS; CLOPIDOGREL; CORONARY ARTERY DISEASE; DIABETES MELLITUS; TYPE 2; FEMALE; FIBRINOGEN; HUMANS; INTEGRIN BETA3; MALE; MIDDLE AGED; PLATELET AGGREGATION; PLATELET AGGREGATION INHIBITORS; PLATELET FUNCTION TESTS; PLATELET GLYCOPROTEIN GPIIB-IIIA COMPLEX; POLYMORPHISM; GENETIC; PROSPECTIVE STUDIES; THROMBOXANE B2; ACETYLSALICYLIC ACID; ARACHIDONIC ACID; CLOPIDOGREL; FIBRINOGEN; FIBRINO…	J PHYSIOL PHARMACOL	J. PHYSIOL. PHARMACOL.	ENGLISH	POLISH PHYSIOLOGICAL SOCIETY	2019	A. SIENNICKA; DEPARTMENT OF LABORATORY DIAGNOSTICS, POMERANIAN MEDICAL UNIVERSITY, SZCZECIN, 72 POWSTANCOW WIELKOPOLSKICH AV., 70-111, POLAND; EMAIL: ALDONA.SIENNICKA@PUM.EDU.PL	08675910	JOURNAL OF PHYSIOLOGY AND PHARMACOLOGY	13	EVALUATION OF PLATELET REACTIVITY DURING COMBINED ANTIPLATELET THERAPY IN PATIENTS WITH STABLE CORONARY ARTERY DISEASE IN RELATION TO DIABETES TYPE 2 AND THE GPIIBIIIA RECEPTOR GENE POLYMORPHISM	70	ISI	POMERANIAN MEDICAL UNIVERSITY;POMERANIAN MEDICAL UNIVERSITY	NOTREPORTED;POMERANIAN MEDICAL UNIVERSITY;NOTREPORTED		JASTRZEBSKA M, 2019, J PHYSIOL PHARMACOL	JASTRZEBSKA M, 2019, J PHYSIOL PHARMACOL
JIA C;WANG R;LONG T;XU Y;ZHANG Y;PENG R;ZHANG X;GUO H;YANG H;WU T;HE M	none	PLASMA SELENIUM AND NRF2 PROMOTER VARIANTS (E.G., RS6721961) ARE ASSOCIATED WITH CARDIOVASCULAR DISEASE RISK IN THE GENERAL POPULATION. HOWEVER, EPIDEMIOLOGICAL EVIDENCE ON THE INTERACTION BETWEEN PLASMA SELENIUM AND NRF2 GENETIC SUSCEPTIBILITY IN RELATION TO INCIDENT CORONARY HEART DISEASE (CHD) RISK REMAINS SCARCE, ESPECIALLY AMONG INDIVIDUALS WITH TYPE 2 DIABETES (T2D). THUS, WE EXAMINED WHETH…	DEPARTMENT OF OCCUPATIONAL AND ENVIRONMENTAL HEALTH, MINISTRY OF EDUCATION AND STATE KEY LABORATORY OF ENVIRONMENTAL HEALTH (INCUBATING), SCHOOL OF PUBLIC HEALTH, TONGJI MEDICAL COLLEGE, HUAZHONG UNIVERSITY OF SCIENCE AND TECHNOLOGY, WUHAN, CHINA; DEPARTMENT OF CARDIOVASCULAR DISEASES, DONGFENG CENTRAL HOSPITAL, HUBEI UNIVERSITY OF MEDICINE, HUBEI, SHIYAN, CHINA		10.2337/db21-1124	ARTICLE	CORONARY DISEASE; DIABETES MELLITUS; TYPE 2; HUMANS; NF-E2-RELATED FACTOR 2; POLYMORPHISM; GENETIC; RISK FACTORS; SELENIUM; ANTIDIABETIC AGENT; HYPNOTIC AGENT; INSULIN; SELENIUM; TRANSCRIPTION FACTOR NRF2; SELENIUM; TRANSCRIPTION FACTOR NRF2; AGED; ALLELE; ARTICLE; CARDIOVASCULAR RISK; COHORT ANALYSIS; CONTROLLED STUDY; DIABETIC PATIENT; FEMALE; FOLLOW UP; GENETIC POLYMORPHISM; GENETIC RISK; GENE…	DIABETES	DIABETES	ENGLISH	AMERICAN DIABETES ASSOCIATION INC.	2022	M. HE; DEPARTMENT OF OCCUPATIONAL AND ENVIRONMENTAL HEALTH, MINISTRY OF EDUCATION AND STATE KEY LABORATORY OF ENVIRONMENTAL HEALTH (INCUBATING), SCHOOL OF PUBLIC HEALTH, TONGJI MEDICAL COLLEGE, HUAZHONG UNIVERSITY OF SCIENCE AND TECHNOLOGY, WUHAN, CHINA; EMAIL: HEMEIAN@HOTMAIL.COM	00121797	DIABETES	1	NRF2 GENETIC POLYMORPHISM MODIFIES THE ASSOCIATION OF PLASMA SELENIUM LEVELS WITH INCIDENT CORONARY HEART DISEASE AMONG INDIVIDUALS WITH TYPE 2 DIABETES	71	ISI	HUAZHONG UNIVERSITY OF SCIENCE AND TECHNOLOGY;HUBEI UNIVERSITY OF MEDICINE	NOTREPORTED;HUAZHONG UNIVERSITY OF SCIENCE AND TECHNOLOGY;NOTREPORTED		JIA C, 2022, DIABETES	JIA C, 2022, DIABETES
JOHANSEN K;SKOTNICKI A;SMITH R;DUNN B;ZIADY G;SKOTNICKI M	none	THE RELATIONSHIP BETWEEN CORONARY ARTERY DISEASE, HDL CHOLESTEROL, AND THE HYPERVARIABLE REGION FLANKING THE HUMAN INSULIN GENE WAS STUDIED IN SAUDI ARABIAN NON‐DIABETIC SUBJECTS (N = 68) AND IN PATIENTS WITH TYPE 2 DIABETES (N = 35). A LOCUS OF INSULIN‐GENE‐LINKED DNA POLYMORPHISM WITH THREE AVERAGE SIZE CLASSES OF ALLELES WAS FOUND: A SMALL CLASS 1, A RARE MEDIUM SIZE CLASS 2, AND A LARGE CLASS…	DEPARTMENT OF MEDICINE, KING FAISAL SPECIALIST HOSPITAL AND RESEARCH CENTRE, RIYADH, SAUDI ARABIA; DEPARTMENT OF BIOLOGICAL AND MEDICAL RESEARCH, KING FAISAL SPECIALIST HOSPITAL AND RESEARCH CENTRE, RIYADH, SAUDI ARABIA	CORONARY ARTERY DISEASE; HDL CHOLESTEROL; INSULIN GENE POLYMORPHISM; TYPE 2 DIABETES	10.1111/j.1464-5491.1989.tb01199.x	ARTICLE	ALLELES; CORONARY DISEASE; DIABETES MELLITUS; NON-INSULIN-DEPENDENT; DNA; FEMALE; GENES; STRUCTURAL; GENOTYPE; HUMAN; INSULIN; LEUKOCYTES; LIPOPROTEINS; HDL CHOLESTEROL; MALE; MIDDLE AGE; POLYMORPHISM (GENETICS); HIGH DENSITY LIPOPROTEIN CHOLESTEROL; INSULIN; CONTROLLED STUDY; CORONARY ARTERY DISEASE; FEMALE; GENE EXPRESSION; GENETIC ANALYSIS; GENETIC POLYMORPHISM; HUMAN; HUMAN CELL; MAJOR CLINIC…	DIABET MED	DIABET. MED.	ENGLISH		1989		07423071	DIABETIC MEDICINE	7	CORONARY ARTERY DISEASE HDL CHOLESTEROL AND INSULINGENE FLANKING SEQUENCES	6	ISI	KING FAISAL SPECIALIST HOSPITAL AND RESEARCH CENTRE;KING FAISAL SPECIALIST HOSPITAL AND RESEARCH CENTRE	KING FAISAL SPECIALIST HOSPITAL AND RESEARCH CENTRE;KING FAISAL SPECIALIST HOSPITAL AND RESEARCH CENTRE		JOHANSEN K, 1989, DIABET MED	JOHANSEN K, 1989, DIABET MED
KALNIŅA I;LATKOVSKIS G;NIKITINA-ZAĶE L;MACKEVIČS V;PEČULIS R;KAPA I;FRIDMANIS D;ERGLIS A;PIRAGS V;KLOVIŅÇ J	none	DESPITE THE NUMBER OF RECENTLY CONDUCTED STUDIES SEEKING TO DETERMINE THE ASSOCIATION BETWEEN GENETIC VARIANTS OF ADIPONECTIN GENE AND SUSCEPTIBILITY TO TYPE 2 DIABETES (T2D) AND INCREASED BODY MASS INDEX (BMI), THE RESULTS OBTAINED ARE OFTEN INCONSISTENT. TO DETERMINE THE IMPACT OF COMMON POLYMORPHISMS IN PROMOTER AND CODING REGIONS OF ADIPONECTIN GENE ON THESE CONDITIONS IN LATVIAN POPULATION, …	LATVIAN BIOMEDICAL RESEARCH AND STUDY CENTRE, LV-1067, RGA, RATSUPITES IELA 1, LATVIA; LATVIAN CENTRE OF CARDIOLOGY, PAULS STRADIŅÇ CLINICAL UNIVERSITY HOSPITAL, RIGA, LV-1002, PILSOU IELA 13, LATVIA; FACULTY OF MEDICINE, RGA STRADIŅÇ UNIVERSITY, RIGA, LV-1009, DZIRCIEMA IELA 16, LATVIA; DEPARTMENT OF ENDOCRINOLOGY, PAULS STRADIŅÇ CLINICAL UNIVERSITY HOSPITAL, RIGA, LV-1002, PILSOU IELA 13, LATVIA	ADIPOQ; BMI; CHD; T2D; TAGSNP	10.2478/v10046-009-0046-1	ARTICLE		PROC LATV ACAD SCI, SECT B NAT EXACT APPL SCI	PROC. LATV. ACAD. SCI., SECT. B NAT. EXACT. APPL. SCI.	ENGLISH	LATVIAN ACADEMY OF SCIENCES	2009		1407009X	PROCEEDINGS OF THE LATVIAN ACADEMY OF SCIENCES, SECTION B: NATURAL, EXACT, AND APPLIED SCIENCES	5	ANALYSIS OF POLYMORPHISMS AT THE ADIPONECTIN GENE LOCUS IN ASSOCIATION WITH TYPE 2 DIABETES BODY MASS INDEX AND CARDIOVASCULAR TRAITS IN LATVIAN POPULATION	63	ISI	LATVIAN BIOMEDICAL RESEARCH AND STUDY CENTRE;PAULS STRADIŅÇ CLINICAL UNIVERSITY HOSPITAL;RGA STRADIŅÇ UNIVERSITY;PAULS STRADIŅÇ CLINICAL UNIVERSITY HOSPITAL	LATVIAN BIOMEDICAL RESEARCH AND STUDY CENTRE;PAULS STRADIŅÇ CLINICAL UNIVERSITY HOSPITAL;RGA STRADIŅÇ UNIVERSITY;PAULS STRADIŅÇ CLINICAL UNIVERSITY HOSPITAL		KALNIŅA I, 2009, PROC LATV ACAD SCI, SECT B NAT EXACT APPL SCI	KALNIŅA I, 2009, PROC LATV ACAD SCI, SECT B NAT EXACT APPL SCI
KAMBOH M;ASTON C;HAMMAN R	none	WE HAVE DETERMINED APOLIPOPROTEIN E (APOE = PROTEIN, APOE = GENE) POLYMORPHISM AND ITS RELATIONSHIP WITH TOTAL CHOLESTEROL (TC), LOW DENSITY LIPOPROTEIN CHOLESTEROL (LDL-C), HIGH DENSITY LIPOPROTEIN CHOLESTEROL (HDL-C) AND TRIGLYCERIDE LEVELS IN NORMOGLYCEMIC HISPANICS (N = 446) AND NON-HISPANIC WHITES (NHWS) (N = 659) AS WELL AS IN DIABETIC HISPANICS (N = 235) AND NHWS (N= 116) FROM THE SAN LUIS…	DEPARTMENT OF HUMAN GENETICS, GRADUATE SCHOOL OF PUBLIC HEALTH, UNIVERSITY OF PITTSBURGH, PITTSBURGH, PA 15261, UNITED STATES; DEPARTMENT OF PREVENTIVE MEDICINE AND BIOMETRICS, UNIVERSITY OF COLORADO SCHOOL OF MEDICINE, DENVER, CO, UNITED STATES		10.1016/0021-9150(94)05409-C	ARTICLE	ADULT; ALLELES; APOLIPOPROTEINS E; BASE SEQUENCE; BLOOD GLUCOSE; CHOLESTEROL; COLORADO; CORONARY DISEASE; DIABETES MELLITUS; NON-INSULIN-DEPENDENT; FEMALE; GENE FREQUENCY; GENOTYPE; HISPANIC AMERICANS; HUMAN; LIPOPROTEINS; HDL CHOLESTEROL; LIPOPROTEINS; LDL CHOLESTEROL; MALE; MIDDLE AGE; MOLECULAR SEQUENCE DATA; POLYMORPHISM (GENETICS); POSTMENOPAUSE; PREMENOPAUSE; SUPPORT; NON-U.S. GOV'T; SUPPOR…	ATHEROSCLEROSIS	ATHEROSCLEROSIS	ENGLISH		1995		00219150	ATHEROSCLEROSIS	107	THE RELATIONSHIP OF APOE POLYMORPHISM AND CHOLESTEROL LEVELS IN NORMOGLYCEMIC AND DIABETIC SUBJECTS IN A BIETHNIC POPULATION FROM THE SAN LUIS VALLEY COLORADO	112	ISI	UNIVERSITY OF PITTSBURGH;UNIVERSITY OF COLORADO SCHOOL OF MEDICINE	UNIVERSITY OF PITTSBURGH;UNIVERSITY OF COLORADO SCHOOL OF MEDICINE		KAMBOH MI, 1995, ATHEROSCLEROSIS	KAMBOH MI, 1995, ATHEROSCLEROSIS
KARNS R;SUCCOP P;ZHANG G;SUN G;INDUGULA S;HAVAS-AUGUSTIN D;NOVOKMET N;DURAKOVIC Z;MILANOVIC S;MISSONI S;VULETIC S;CHAKRABORTY R;RUDAN P;DEKA R	ALBERTI KGMM, 1998, DIABETIC MED, V15, P539, DOI 10.1002/(SICI)1096-9136(199807)15:7<539::AID-DIA668>3.0.CO;2-S;ANONYMOUS, 2001, NIH PUBLICATION;BOX GEP, 1964, J ROY STAT SOC B, V26, P211, DOI 10.1111/J.2517-6161.1964.TB00553.X;CAMERON AJ, 2004, ENDOCRIN METAB CLIN, V33, P351, DOI 10.1016/J.ECL.2004.03.005;CHAN JCN, 1996, DIABETES CARE, V19, P953, DOI 10.2337/DIACARE.19.9.953;COWEY S, 2006, AM J …	OBJECTIVE TO PROVIDE A QUANTITATIVE MAP OF RELATIONSHIPS BETWEEN METABOLIC TRAITS, GENOME-WIDE ASSOCIATION STUDIES (GWAS) VARIANTS, METABOLIC SYNDROME (METS), AND METABOLIC DISEASES THROUGH FACTOR ANALYSIS AND STRUCTURAL EQUATION MODELING (SEM). DESIGN AND METHODS CROSS-SECTIONAL DATA WERE COLLECTED ON 1,300 INDIVIDUALS FROM AN EASTERN ADRIATIC CROATIAN ISLAND, INCLUDING 14 ANTHROPOMETRIC AND BIO…	UNIV CINCINNATI, DEPT ENVIRONM HLTH, DIV EPIDEMIOL & BIOSTAT, CINCINNATI, OH 45221 USA.; CINCINNATI CHILDRENS HOSP, DIV HUMAN GENET, CINCINNATI, OH USA.; INST ANTHROPOL RES, ZAGREB, CROATIA.; UNIV ZAGREB, SCH MED, ANDRIJA STAMPAR SCH PUBL HLTH, ZAGREB 41001, CROATIA.; UNIV NORTH TEXAS HLTH SCI CTR, CTR COMPUTAT GEN, FT WORTH, TX USA.;		10.1002/oby.20445	ARTICLE	CARDIOVASCULAR-DISEASE; RISK; PREVALENCE; ADULTS; POPULATION; CONSULTATION; COMPONENTS; DIAGNOSIS; MORTALITY; OBESITY	OBESITY	OBESITY	ENGLISH	WILEY-BLACKWELL	2013	DEKA, R (CORRESPONDING AUTHOR), UNIV CINCINNATI, DEPT ENVIRONM HLTH, DIV EPIDEMIOL & BIOSTAT, CINCINNATI, OH 45221 USA.	1930-7381	OBESITY	15	MODELING METABOLIC SYNDROME THROUGH STRUCTURAL EQUATIONS OF METABOLIC TRAITS COMORBID DISEASES AND GWAS VARIANTS	21	ISI	UNIVERSITY SYSTEM OF OHIO; UNIVERSITY OF CINCINNATI; CINCINNATI CHILDREN'S HOSPITAL MEDICAL CENTER; INSTITUTE FOR ANTHROPOLOGICAL RESEARCH ZAGREB; UNIVERSITY OF ZAGREB	UNIV CINCINNATI		KARNS R, 2013, OBESITY	KARNS R, 2013, OBESITY
KATAKAMI N;KANETO H;MATSUOKA T;TAKAHARA M;OSONOI T;SAITOU M;KAWAI K;ISHIBASHI F;KASHIWAGI A;KAWAMORI R;SHIMOMURA I;YAMASAKI Y	none	OBJECTIVE: OXIDATIVE STRESS, WHICH IS PROVOKED IN PATIENTS WITH DIABETES, PLAYS CRITICAL ROLES IN THE PATHOGENESIS OF CORONARY HEART DISEASE (CHD). WE SIMULTANEOUSLY DETERMINED 5 RELATIVELY COMMON GENETIC VARIANTS RELATED TO OXIDATIVE STRESS AND EVALUATED THE COMBINED EFFECT ON CHD. METHODS: WE ENROLLED 1977 JAPANESE TYPE 2 DIABETIC SUBJECTS WITHOUT HISTORY OF CVD (MALES 66.1%, 59.5±10.0 YEARS OL…	DEPARTMENT OF METABOLIC MEDICINE, OSAKA UNIVERSITY GRADUATE SCHOOL OF MEDICINE, JAPAN; DEPARTMENT OF METABOLISM AND ATHEROSCLEROSIS, OSAKA UNIVERSITY GRADUATE SCHOOL OF MEDICINE, JAPAN; NAKA MEMORIAL CLINIC, JAPAN; KAWAI CLINIC, JAPAN; ISHIBASHI CLINIC, JAPAN; DEPARTMENT OF MEDICINE, SHIGA UNIVERSITY OF MEDICAL SCIENCE, JAPAN; SPORTOLOGY CENTER, JUNTENDO UNIVERSITY SCHOOL OF MEDICINE, JAPAN	ATHEROSCLEROSIS; CORONARY HEART DISEASE; DIABETES; OXIDATIVE STRESS; POLYMORPHISM	10.1016/j.atherosclerosis.2014.05.936	ARTICLE	AGED; ASIAN CONTINENTAL ANCESTRY GROUP; CORONARY DISEASE; DIABETES MELLITUS; TYPE 2; FEMALE; GENETIC PREDISPOSITION TO DISEASE; GLUTAMATE-CYSTEINE LIGASE; HUMANS; MALE; MIDDLE AGED; NADPH OXIDASE; NITRIC OXIDE SYNTHASE TYPE III; OXIDATIVE STRESS; PEROXIDASE; POLYMORPHISM; GENETIC; PROSPECTIVE STUDIES; RISK FACTORS; SUPEROXIDE DISMUTASE; ENDOTHELIAL NITRIC OXIDE SYNTHASE; GLUTAMATE CYSTEINE LIGASE…	ATHEROSCLEROSIS	ATHEROSCLEROSIS	ENGLISH	ELSEVIER IRELAND LTD	2014	N. KATAKAMI; DEPARTMENT OF METABOLIC MEDICINE, OSAKA UNIVERSITY GRADUATE SCHOOL OF MEDICINE, SUITA, OSAKA, 2-2, YAMADAOKA, 565-0871, JAPAN; EMAIL: KATAKAMI@ENDMET.MED.OSAKA-U.AC.JP	00219150	ATHEROSCLEROSIS	18	ACCUMULATION OF OXIDATIVE STRESSRELATED GENE POLYMORPHISMS AND THE RISK OF CORONARY HEART DISEASE EVENTS IN PATIENTS WITH TYPE 2 DIABETES AN 8YEAR PROSPECTIVE STUDY	235	ISI	OSAKA UNIVERSITY GRADUATE SCHOOL OF MEDICINE;OSAKA UNIVERSITY GRADUATE SCHOOL OF MEDICINE;NAKA MEMORIAL CLINIC;KAWAI CLINIC;ISHIBASHI CLINIC;SHIGA UNIVERSITY OF MEDICAL SCIENCE;JUNTENDO UNIVERSITY SCHOOL OF MEDICINE	NOTREPORTED;OSAKA UNIVERSITY GRADUATE SCHOOL OF MEDICINE;NOTREPORTED		KATAKAMI N, 2014, ATHEROSCLEROSIS	KATAKAMI N, 2014, ATHEROSCLEROSIS
KATSUYA T;HORIUCHI M;CHEN Y;KOIKE G;PRATT R;DZAU V;REAVEN G	none	RECENT REPORTS HAVE SHOWN THAT THE FREQUENCY OF THE HOMOZYGOUS DELETION GENOTYPE (DD) OF THE ANGIOTENSIN-CONVERTING ENZYME (ACE) GENE IS HIGHLY ASSOCIATED WITH MYOCARDIAL INFARCTION AND CARDIOMYOPATHY, PARTICULARLY IN THOSE CONSIDERED TO BE AT LOW RISK FOR CORONARY HEART DISEASE (CHD) ON THE BASIS OF THEIR APOB OR LDL CHOLESTEROL CONCENTRATIONS. THE PRESENT STUDY WAS INITIATED TO EXTEND THIS INQU…	FALK CARDIOVASCULAR RESEARCH CENTER, DIVISION OF CARDIOVASCULAR MEDICINE, DEPT. OF VET. AFFAIRS MEDICAL CENTER, PALO ALTO, CA, UNITED STATES; DIV. GERONTOLOGY, ENDOCRINOL., M., DEPARTMENT OF MEDICINE, STANFORD UNIV. SCH. MED. G., PALO ALTO, CA, UNITED STATES; DEPT. OF VET. AFFAIRS MEDICAL CENTER, GRECC 182B, PALO ALTO, CA 94304, 3801 MIRANDA AVE, UNITED STATES	CORONARY HEART DISEASE RISK FACTORS; INSERTION/DELETION POLYMORPHISM; INSULIN RESPONSE TO GLUCOSE; LIPOPROTEINS; STEADY-STATE PLASMA GLUCOSE	10.1161/01.ATV.15.6.779	ARTICLE	APOLIPOPROTEIN B; CHOLESTEROL; DIPEPTIDYL CARBOXYPEPTIDASE; GENE PRODUCT; GLUCOSE; HIGH DENSITY LIPOPROTEIN CHOLESTEROL; INSULIN; LIPID; LOW DENSITY LIPOPROTEIN CHOLESTEROL; TRIACYLGLYCEROL; ADULT; ARTICLE; BODY MASS; CARDIOMYOPATHY; CONTROLLED STUDY; CORONARY RISK; DYSLIPIDEMIA; FEMALE; GENE DELETION; GENETIC POLYMORPHISM; GENOTYPE; GLUCOSE INTOLERANCE; HEART INFARCTION; HUMAN; HYPERINSULINEMIA;…	ARTERIOSCLER THROMB VASC BIOL	ARTERIOSCLER. THROMB. VASC. BIOL.	ENGLISH	LIPPINCOTT WILLIAMS AND WILKINS	1995		10795642	ARTERIOSCLEROSIS, THROMBOSIS, AND VASCULAR BIOLOGY	69	RELATIONS BETWEEN DELETION POLYMORPHISM OF THE ANGIOTENSINCONVERTING ENZYME GENE AND INSULIN RESISTANCE GLUCOSE INTOLERANCE HYPERINSULINEMIA AND DYSLIPIDEMIA	15	ISI	FALK CARDIOVASCULAR RESEARCH CENTER;STANFORD UNIV. SCH. MED. G.;DEPT. OF VET. AFFAIRS MEDICAL CENTER	FALK CARDIOVASCULAR RESEARCH CENTER;STANFORD UNIV. SCH. MED. G.;DEPT. OF VET. AFFAIRS MEDICAL CENTER		KATSUYA T, 1995, ARTERIOSCLER THROMB VASC BIOL	KATSUYA T, 1995, ARTERIOSCLER THROMB VASC BIOL
KAWASAKI I;TAHARA H;EMOTO M;SHOJI T;NISHIZAWA Y	none	CHOLESTERYL ESTER TRANSFER PROTEIN (CETP) IS A KEY REGULATING FACTOR OF LIPID METABOLISM, AND THE POLYMORPHISM OF ITS GENE MAY THEREFORE BE A CANDIDATE FOR MODULATING THE LIPID PARAMETERS, ALTERING THE SUSCEPTIBILITY TO ATHEROSCLEROSIS IN TYPE 2 DIABETIC SUBJECTS. IN A GROUP OF 443 UNRELATED JAPANESE PATIENTS WITH TYPE 2 DIABETES, WE STUDIED THE B1B2 POLYMORPHISM AT THE CETP LOCUS, WHICH IS DETEC…	DIVISION OF METABOLISM, ENDOCRINOLOGY, AND MOLECULAR MEDICINE, DEPARTMENT OF INTERNAL MEDICINE, OSAKA CITY UNIVERSITY GRADUATE SCHOOL OF MEDICINE, OSAKA, JAPAN; DIVISION OF METABOLISM, ENDOCRINOLOGY, AND MOLECULAR MEDICINE, DEPARTMENT OF INTERNAL MEDICINE, OSAKA CITY UNIVERSITY GRADUATE SCHOOL OF MEDICINE, ABENO-KU, OSAKA 545-8585, 1-4-3, ASAHI-CHO, JAPAN		10.2337/diabetes.51.3.871	ARTICLE	APOLIPOPROTEIN A1; CHOLESTEROL ESTER TRANSFER PROTEIN; HIGH DENSITY LIPOPROTEIN CHOLESTEROL; RESTRICTION ENDONUCLEASE; TAQ POLYMERASE; ADOLESCENT; ADULT; AGED; ALLELE; ARTICLE; ATHEROSCLEROSIS; CEREBROVASCULAR DISEASE; CONTROLLED STUDY; DNA POLYMORPHISM; FEMALE; GENE LOCUS; GENETIC SUSCEPTIBILITY; GENOTYPE; HUMAN; ISCHEMIC HEART DISEASE; JAPAN; LIPID METABOLISM; MAJOR CLINICAL STUDY; MALE; NON IN…	DIABETES	DIABETES	ENGLISH	AMERICAN DIABETES ASSOCIATION INC.	2002	H. TAHARA; DIVISION OF METABOLISM, DEPARTMENT OF INTERNAL MEDICINE, OSAKA CITY UNIV. GRAD. SCH. OF MED., OSAKA 545-8585, 1-4-3, ASAHI-CHO, ABENO-KU, JAPAN; EMAIL: HIDEKI-T@KA2.SO-NET.NE.JP	00121797	DIABETES	28	RELATIONSHIP BETWEEN TAQIB CHOLESTERYL ESTER TRANSFER PROTEIN GENE POLYMORPHISM AND MACROVASCULAR COMPLICATIONS IN JAPANESE PATIENTS WITH TYPE 2 DIABETES	51	ISI	OSAKA CITY UNIVERSITY GRADUATE SCHOOL OF MEDICINE;OSAKA CITY UNIVERSITY GRADUATE SCHOOL OF MEDICINE	NOTREPORTED;OSAKA CITY UNIV. GRAD. SCH. OF MED.;NOTREPORTED		KAWASAKI I, 2002, DIABETES	KAWASAKI I, 2002, DIABETES
KAYE J;STANTON K;MCCANN V;VASIKARAN S;BURKE V;TAYLOR R;VAN B F	none	IN THE PRESENT STUDY, THE DETERMINANTS OF FASTING PLASMA HOMOCYSTEINE IN DIABETIC SUBJECTS WERE EXAMINED; WHETHER PLASMA HOMOCYSTEINE AND VASCULAR DISEASE ARE RELATED AND THE INFLUENCE OF THE C677T POLYMORPHISM IN THE METHYLENETETRAHYDROFOLATE REDUCTASE (MTHFR) GENE ON SERUM AND ERYTHROCYTE FOLATE, PLASMA HOMOCYSTEINE AND VASCULAR DISEASE. DIABETIC CLINIC SUBJECTS (TYPE I, N = 354; TYPE II, N = 3…	DEPARTMENT OF BIOCHEMISTRY, ROYAL PERTH HOSPITAL, BOX X2213, PERTH, WA 6847, GPO, AUSTRALIA	DIABETES; FOLATE; HOMOCYSTEINE; METHYLENETETRAHYDROFOLATE; VASCULAR DISEASE	10.1042/CS20010323	ARTICLE	ADULT; AGED; ANALYSIS OF VARIANCE; CEREBROVASCULAR ACCIDENT; CORONARY DISEASE; CROSS-SECTIONAL STUDIES; DIABETES MELLITUS; TYPE 1; DIABETES MELLITUS; TYPE 2; DIABETIC ANGIOPATHIES; ERYTHROCYTES; FEMALE; FOLIC ACID; GENOTYPE; HOMOCYSTEINE; HUMANS; LOGISTIC MODELS; MALE; METHYLENETETRAHYDROFOLATE REDUCTASE (NADPH2); MIDDLE AGED; OXIDOREDUCTASES ACTING ON CH-NH GROUP DONORS; POLYMORPHISM; GENETIC; F…	CLIN SCI	CLIN. SCI.	ENGLISH		2002	F.M. VAN BOCKXMEER; DEPARTMENT OF BIOCHEMISTRY, ROYAL PERTH HOSPITAL, BOX X2213, PERTH, WA 6847, GPO, AUSTRALIA; EMAIL: FRANK.VB@HEALTH.WA.GOV.AU	01435221	CLINICAL SCIENCE	33	HOMOCYSTEINE FOLATE METHYLENETETRAHYDROFOLATE REDUCTASE GENOTYPE AND VASCULAR MORBIDITY IN DIABETIC SUBJECTS	102	ISI	ROYAL PERTH HOSPITAL	NOTREPORTED;ROYAL PERTH HOSPITAL;EMAIL: FRANK.VB@HEALTH.WA.GOV.AU		KAYE JM, 2002, CLIN SCI	KAYE JM, 2002, CLIN SCI
KIM G;PARK H;WOO J;KIM M;KOH P;MIN W;KO Y;KIM C;WON C;CHO J	AKUNE T, 2004, J CLIN INVEST, V113, P846, DOI 10.1172/JCI200419900;BAUDRY A, 2006, J CELL SCI, V119, P889, DOI 10.1242/JCS.02792;CLAYCOMBE KJ, 1998, AM J PHYSIOL-REG I, V274, PR1253, DOI 10.1152/AJPREGU.1998.274.5.R1253;CRISTANCHO AG, 2011, NAT REV MOL CELL BIO, V12, P722, DOI 10.1038/NRM3198;FARESE RV, 2005, EXP BIOL MED, V230, P593;FARMER SR, 2005, INT J OBESITY, V29, PS13, DOI 10.1038/SJ.IJO.0…	BACKGROUND: OBESITY IS A HEALTH HAZARD THAT IS ASSOCIATED WITH A NUMBER OF DISEASES AND METABOLIC ABNORMALITIES, SUCH AS TYPE-2 DIABETES, HYPERTENSION, DYSLIPIDEMIA, AND CORONARY HEART DISEASE. IN THE CURRENT STUDY, WE INVESTIGATED THE EFFECTS OF CITRUS AURANTIUM FLAVONOIDS (CAF) ON THE INHIBITION OF ADIPOGENESIS AND ADIPOCYTE DIFFERENTIATION IN 3T3-L1 CELLS. METHODS: DURING ADIPOCYTE DIFFERENTIA…	GYEONGSANG NATL UNIV, COLL VET MED, INST LIFE SCI, JINJU, SOUTH KOREA.; RAD, NATL INST ANIM SCI, ANIM GENET RESOURCES STN, NAMWON, SOUTH KOREA.; GYEONGNAM NATL UNIV SCI & TECHNOL, DEPT ANIM SCI & BIOTECHNOL, JINJU, SOUTH KOREA.; GYONGSANG NATL UNIV, COLL VET MED, DEPT ANAT & DEV BIOL, JINJU 660701, SOUTH KOREA.;		10.1186/1472-6882-12-31	ARTICLE	GLYCOGEN-SYNTHASE KINASE; PROTEIN; GLUCOSE; EXPRESSION; OBESITY; 3-BETA; B/AKT; ALPHA	BMC COMPLEM ALTERN M	BMC COMPLEMENT. ALTERN. MED.	ENGLISH	BMC	2012	CHO, JH (CORRESPONDING AUTHOR), GYEONGSANG NATL UNIV, COLL VET MED, INST LIFE SCI, JINJU, SOUTH KOREA.		BMC COMPLEMENTARY AND ALTERNATIVE MEDICINE	82	ICITRUS AURANTIUMI FLAVONOIDS INHIBIT ADIPOGENESIS THROUGH THE AKT SIGNALING PATHWAY IN 3T3L1 CELLS	12	ISI	GYEONGSANG NATIONAL UNIVERSITY; NATIONAL INSTITUTE OF ANIMAL SCIENCE, REPUBLIC OF KOREA; GYEONGNAM NATIONAL UNIVERSITY OF SCIENCE AND TECHNOLOGY; GYEONGSANG NATIONAL UNIVERSITY	GYEONGSANG NATL UNIV		KIM GS, 2012, BMC COMPLEM ALTERN M	KIM GS, 2012, BMC COMPLEM ALTERN M
KIMURA H;GEJYO F;SUZUKI Y;SUZUKI S;MIYAZAKI R;ARAKAWA M	ANONYMOUS, KIDNEY;BALLARD DJ, 1988, DIABETES, V37, P405, DOI 10.2337/DIABETES.37.4.405;BARICOS WH, 1995, KIDNEY INT, V47, P1039, DOI 10.1038/KI.1995.150;BECKER BN, 1997, J AM SOC NEPHROL, V8, P475;CAMBIEN F, 1992, NATURE, V359, P641, DOI 10.1038/359641A0;CHAIT A, 1994, JOSLINS DIABETES MEL, P648;COSTEROUSSE O, 1993, BIOCHEM J, V290, P33, DOI 10.1042/BJ2900033;DANSER AHJ, 1995, CIRCULATION, V92, P…	BACKGROUND. AN INSERTION OR DELETION (I/D) POLYMORPHISM IN THE ANGIOTENSIN CONVERTING ENZYME (ACE) GENE AND A 4/5-GUANINE TRACT POLYMORPHISM (4G/5G) IN THE PROMOTER REGION OF THE PLASMINOGEN ACTIVATOR INHIBITOR-1 (PAI-1) GENE ARE ASSOCIATED WITH THE PLASMA ACTIVITIES OF THESE SUBSTANCES AND WITH CORONARY HEART DISEASE. IN SMOOTH MUSCLE CELLS AND MESANGIAL CELLS, THE ANGIOTENSIN II SYNTHESIZED BY …	FUKUI MED SCH, DEPT CLIN LAB & MED, MATSUOKA, FUKUI 91011, JAPAN.; NIIGATA UNIV, SCH MED, DEPT MED 2, NIIGATA, JAPAN.; FUJITA MEM HOSP, FUKUI, JAPAN.;	ACE; PAI-1; POLYMORPHISM; DIABETIC NEPHROPATHY; MACROANGIOPATHY; SYNERGISTIC EFFECT	10.1046/j.1523-1755.1998.00139.x	ARTICLE	MYOCARDIAL-INFARCTION; DELETION POLYMORPHISM; RENAL COMPLICATIONS; MESANGIAL CELLS; PAI-1 GENE; EXPRESSION; MELLITUS; NEPHROPATHY; SYSTEM; RISK	KIDNEY INT	KIDNEY INT.	ENGLISH	BLACKWELL SCIENCE INC	1998	KIMURA, H (CORRESPONDING AUTHOR), FUKUI MED SCH, DEPT CLIN LAB & MED, 23 SHIMOAITSUKI, MATSUOKA, FUKUI 91011, JAPAN.	0085-2538	KIDNEY INTERNATIONAL	60	POLYMORPHISMS OF ANGIOTENSIN CONVERTING ENZYME AND PLASMINOGEN ACTIVATOR INHIBITOR1 GENES IN DIABETES AND MACROANGIOPATHY	54	ISI	UNIVERSITY OF FUKUI; NIIGATA UNIVERSITY	FUKUI MED SCH		KIMURA H, 1998, KIDNEY INT	KIMURA H, 1998, KIDNEY INT
KLARIN D;DAMRAUER S;CHO K;SUN Y;TESLOVICH T;HONERLAW J;GAGNON D;DUVALL S;LI J;PELOSO G;CHAFFIN M;SMALL A;HUANG J;TANG H;LYNCH J;HO Y;LIU D;EMDIN C;LI A;HUFFMAN J;LEE J;NATARAJAN P;CHOWDHURY R;SALEHEEN D;VUJKOVIC M;BARAS A;PYARAJAN S;DI A E;NEALE B;NAHEED A;KHERA A;DANESH J;CHANG K;ABECASIS G;WILLER C;DEWEY F;CAREY D;CONCATO J;GAZIANO J;O'DONNELL C;TSAO P;KATHIRESAN S;RADER D;WILSON P;ASSIMES T	none	THE MILLION VETERAN PROGRAM (MVP) WAS ESTABLISHED IN 2011 AS A NATIONAL RESEARCH INITIATIVE TO DETERMINE HOW GENETIC VARIATION INFLUENCES THE HEALTH OF US MILITARY VETERANS. HERE WE GENOTYPED 312,571 MVP PARTICIPANTS USING A CUSTOM BIOBANK ARRAY AND LINKED THE GENETIC DATA TO LABORATORY AND CLINICAL PHENOTYPES EXTRACTED FROM ELECTRONIC HEALTH RECORDS COVERING A MEDIAN OF 10.0 YEARS OF FOLLOW-UP. …	CENTER FOR GENOMIC MEDICINE, MASSACHUSETTS GENERAL HOSPITAL, HARVARD MEDICAL SCHOOL, BOSTON, MA, UNITED STATES; PROGRAM IN MEDICAL AND POPULATION GENETICS, BROAD INSTITUTE OF MIT AND HARVARD, CAMBRIDGE, MA, UNITED STATES; BOSTON VA HEALTHCARE SYSTEM, BOSTON, MA, UNITED STATES; CORPORAL MICHAEL CRESCENZ VA MEDICAL CENTER, PHILADELPHIA, PA, UNITED STATES; DEPARTMENT OF SURGERY, PERELMAN SCHOOL OF M…		10.1038/s41588-018-0222-9	ARTICLE	AFRICAN CONTINENTAL ANCESTRY GROUP; AGED; CARDIOVASCULAR DISEASES; DIABETES MELLITUS; TYPE 2; ETHNIC GROUPS; EUROPEAN CONTINENTAL ANCESTRY GROUP; FEMALE; GENOME-WIDE ASSOCIATION STUDY; GENOTYPE; HISPANIC AMERICANS; HUMANS; LIPID METABOLISM; LIPIDS; MALE; MIDDLE AGED; POLYMORPHISM; SINGLE NUCLEOTIDE; VETERANS; CHOLESTEROL; COLESTYRAMINE; LIPID; LOW DENSITY LIPOPROTEIN CHOLESTEROL; TRANSCRIPTOME; T…	NAT GENET	NAT. GENET.	ENGLISH	NATURE PUBLISHING GROUP	2018	T.L. ASSIMES; DEPARTMENT OF MEDICINE, STANFORD UNIVERSITY SCHOOL OF MEDICINE, STANFORD, UNITED STATES; EMAIL: TASSIMES@STANFORD.EDU	10614036	NATURE GENETICS	351	GENETICS OF BLOOD LIPIDS AMONG 300000 MULTIETHNIC PARTICIPANTS OF THE MILLION VETERAN PROGRAM	50	ISI	HARVARD MEDICAL SCHOOL;BROAD INSTITUTE OF MIT AND HARVARD;BOSTON VA HEALTHCARE SYSTEM;CORPORAL MICHAEL CRESCENZ VA MEDICAL CENTER;UNIVERSITY OF PENNSYLVANIA;MASSACHUSETTS VETERANS EPIDEMIOLOGY RESEARCH AND INFORMATION CENTER (MAVERIC);EMORY UNIVERSITY;REGENERON GENETICS CENTER;BOSTON UNIVERSITY SCHOOL OF PUBLIC HEALTH;VA SALT LAKE CITY HEALTH CARE SYSTEM;UNIVERSITY OF UTAH SCHOOL OF MEDICINE;STAN…	NOTREPORTED;STANFORD UNIVERSITY SCHOOL OF MEDICINE;NOTREPORTED		KLARIN D, 2018, NAT GENET	KLARIN D, 2018, NAT GENET
KLEMM T;MEHNERT A;SIEGEMUND A;WIESNER T;GELBRICH G;BLÜHER M;PASCHKE R	none	ATHR789ALA VARIANT IN THE VON WILLEBRAND FACTOR (VWF) GENE IS ASSOCIATED WITH INCREASED VWF PLASMA CONCENTRATIONS AND MIGHT THEREFORE AFFECT THE RISK OF CORONARY HEART DISEASE (CHD) IN THE GENERAL POPULATION. PATIENTS WITH TYPE 2 DIABETES HAVE AN INCREASED RISK FOR PREMATURE ATHEROSCLEROSIS AND ARE CHARACTERIZED BY ALTERATIONS OF THE COAGULATION SYSTEM. HOWEVER, IT IS NOT KNOWN WHETHER THE THR789…	3RD MEDICAL DEPARTMENT, STATISTICS AND EPIDEMIOLOGY, UNIVERSITY OF LEIPZIG, LEIPZIG, GERMANY; INSTITUTE OF MEDICAL INFORMATICS, STATISTICS AND EPIDEMIOLOGY, UNIVERSITY OF LEIPZIG, LEIPZIG, GERMANY; UNIVERSITY OF LEIPZIG, III. MEDICAL DEPARTMENT, 04103 LEIPZIG, PHILIPP-ROSENTHAL-STRAßE 27, GERMANY	CHD; THR789ALA VARIANT; TYPE 2 DIABETES; VWF	10.1055/s-2005-872896	ARTICLE	ADULT; AGED; COLLAGEN; CORONARY DISEASE; DIABETES MELLITUS; TYPE 2; FEMALE; GENOTYPE; HUMANS; MALE; MIDDLE AGED; POLYMORPHISM; GENETIC; PROTEIN BINDING; RISTOCETIN; THREONINE; VON WILLEBRAND FACTOR; COLLAGEN; RISTOCETIN; VON WILLEBRAND FACTOR; ADULT; AGED; ARTICLE; BINDING AFFINITY; COMPARATIVE STUDY; CONTROLLED STUDY; FEMALE; GENE; GENETIC VARIABILITY; HUMAN; ISCHEMIC HEART DISEASE; MAJOR CLINIC…	EXP CLIN ENDOCRINOL DIABETES	EXP. CLIN. ENDOCRINOL. DIABETES	ENGLISH		2005	R. PASCHKE; UNIVERSITY OF LEIPZIG, III. MEDICAL DEPARTMENT, 04103 LEIPZIG, PHILIPP-ROSENTHAL-STRAßE 27, GERMANY; EMAIL: PASR@MEDIZIN.UNI-LEIPZIG.DE	09477349	EXPERIMENTAL AND CLINICAL ENDOCRINOLOGY AND DIABETES	18	IMPACT OF THE THR789ALA VARIANT OF THE VON WILLEBRAND FACTOR LEVELS ON RISTOCETIN COFACTOR AND COLLAGEN BINDING CAPACITY AND ITS ASSOCIATION WITH CORONARY HEART DISEASE IN PATIENTS WITH DIABETES MELLITUS TYPE 2	113	ISI	LEIPZIG;UNIVERSITY OF LEIPZIG;UNIVERSITY OF LEIPZIG	R. PASCHKE;UNIVERSITY OF LEIPZIG;NOTREPORTED		KLEMM T, 2005, EXP CLIN ENDOCRINOL DIABETES	KLEMM T, 2005, EXP CLIN ENDOCRINOL DIABETES
KLEMM T;MITTRACH-SCHORIN S;NEUMANN S;GERIKE T;KRANKENBERG H;SCHULER G;PASCHKE R	none	PREVIOUS STUDIES HAVE REPORTED AN ASSOCIATION BETWEEN THE ACE-I/D-POLYMORPHISM AND CORONARY HEART DISEASE (CHD) IN PATIENTS WITH DIABETES MELLITUS. HOWEVER, ACE INHIBITOR TREATMENT, WHICH COULD HAVE COMPENSATED FOR NEGATIVE EFFECTS OF THE D/D FORM OF THE ACE GENE POLYMORPHISM, WAS NOT CONSIDERED IN THE STUDIES. WE INVESTIGATED THE INFLUENCE OF THE ACE-I/D POLYMORPHISM AND THE ACE INHIBITOR TREATM…	III. MEDICAL DEPARTMENT, LEIPZIG UNIVERSITY, LEIPZIG, GERMANY; INST. MED. INFO., STAT./EPIDEMIOL., LEIPZIG UNIVERSITY, LEIPZIG, GERMANY; LEIPZIG HEART CENTRE GMBH, LEIPZIG, GERMANY; III. MEDICAL DEPARTMENT, LEIPZIG UNIVERSITY, 04103 LEIPZIG, PHILIPP-ROSENTHAL-STRASSE 27, GERMANY	COMPLICATIONS OF DIABETES; DIABETES; GENETICS	10.1055/s-2003-38390	ARTICLE	ADULT; AGED; AGED; 80 AND OVER; ALLELES; CARDIOVASCULAR DISEASES; DIABETES MELLITUS; TYPE 2; DIABETIC ANGIOPATHIES; FEMALE; GENE DELETION; GENE FREQUENCY; GENOTYPE; HUMANS; LOGISTIC MODELS; MALE; MIDDLE AGED; MUTATION; PEPTIDYL-DIPEPTIDASE A; PHENOTYPE; POLYMORPHISM; GENETIC; PROSPECTIVE STUDIES; RISK FACTORS; INSERTION SEQUENCES; DIPEPTIDYL CARBOXYPEPTIDASE INHIBITOR; LOW DENSITY LIPOPROTEIN; AD…	HORM METAB RES	HORM. METAB. RES.	ENGLISH		2003	R. PASCHKE; III. MEDICAL DEPARTMENT, LEIPZIG UNIVERSITY, 04103 LEIPZIG, PHILIPP-ROSENTHAL-STRASSE 27, GERMANY; EMAIL: PASR@SERVER3.MEDIZIN.UNI-LEIPZIG.DE	00185043	HORMONE AND METABOLIC RESEARCH	5	NO ASSOCIATION BETWEEN THE ANGIOTENSINCONVERTINGENZYME GENE INSERTIONDELETION POLYMORPHISM AND THE OCCURRENCE OF MACROANGIOPATHY IN PATIENTS WITH DIABETES MELLITUS TYPE 2	35	ISI	LEIPZIG UNIVERSITY;LEIPZIG UNIVERSITY;LEIPZIG HEART CENTRE GMBH;LEIPZIG UNIVERSITY	R. PASCHKE;LEIPZIG UNIVERSITY;NOTREPORTED		KLEMM T, 2003, HORM METAB RES	KLEMM T, 2003, HORM METAB RES
KNOWLES J;XIE W;ZHANG Z;CHENNEMSETTY I;ASSIMES T;PAANANEN J;HANSSON O;PANKOW J;GOODARZI M;CARCAMO-ORIVE I;MORRIS A;CHEN Y;MÄKINEN V;GANNA A;MAHAJAN A;GUO X;ABBASI F;GREENAWALT D;LUM P;MOLONY C;LIND L;LINDGREN C;RAFFEL L;TSAO P;SCHADT E;ROTTER J;SINAIKO A;REAVEN G;YANG X;HSIUNG C;GROOP L;CORDELL H;LAAKSO M;HAO K;INGELSSON E;FRAYLING T;WEEDON M;WALKER M;QUERTERMOUS T	none	DECREASED INSULIN SENSITIVITY, ALSO REFERRED TO AS INSULIN RESISTANCE (IR), IS A FUNDAMENTAL ABNORMALITY IN PATIENTS WITH TYPE 2 DIABETES AND A RISK FACTOR FOR CARDIOVASCULAR DISEASE. WHILE IR PREDISPOSITION IS HERITABLE, THE GENETIC BASIS REMAINS LARGELY UNKNOWN. THE GENETICS OF INSULIN SENSITIVITY CONSORTIUM CONDUCTED A GENOME-WIDE ASSOCIATION STUDY (GWAS) FOR DIRECT MEASURES OF INSULIN SENSITI…	STANFORD UNIVERSITY, DIVISION OF CARDIOVASCULAR MEDICINE AND STANFORD CARDIOVASCULAR INSTITUTE, FALK CARDIOVASCULAR RESEARCH CENTER, 300 PASTEUR DRIVE, STANFORD, 94305, CA, UNITED STATES; INSTITUTE OF BIOMEDICAL AND CLINICAL SCIENCE, UNIVERSITY OF EXETER MEDICAL SCHOOL, UNIVERSITY OF EXETER, EXETER, UNITED KINGDOM; DEPARTMENT OF GENETICS AND GENOMIC SCIENCES, ICAHN INSTITUTE FOR GENOMICS AND MULT…		10.1172/JCI74692	ARTICLE	3T3-L1 CELLS; ADIPOGENESIS; ADOLESCENT; ADULT; ANIMALS; ARYLAMINE N-ACETYLTRANSFERASE; ASIAN CONTINENTAL ANCESTRY GROUP; CHILD; CORONARY DISEASE; EUROPE; EUROPEAN CONTINENTAL ANCESTRY GROUP; FEMALE; GENE FREQUENCY; GENOME-WIDE ASSOCIATION STUDY; GLUCOSE; HEMOGLOBIN A; GLYCOSYLATED; HISPANIC AMERICANS; HUMANS; HYPERGLYCEMIA; HYPERTRIGLYCERIDEMIA; INSULIN RESISTANCE; ISOENZYMES; LIPOLYSIS; MALE; MI…	J CLIN INVEST	J. CLIN. INVEST.	ENGLISH	AMERICAN SOCIETY FOR CLINICAL INVESTIGATION	2015	T. QUERTERMOUS; STANFORD UNIVERSITY, DIVISION OF CARDIOVASCULAR MEDICINE AND STANFORD CARDIOVASCULAR INSTITUTE, FALK CARDIOVASCULAR RESEARCH CENTER, STANFORD, 300 PASTEUR DRIVE, 94305, UNITED STATES; EMAIL: TOMQ1@STANFORD.EDU	00219738	JOURNAL OF CLINICAL INVESTIGATION	86	IDENTIFICATION AND VALIDATION OF NACETYLTRANSFERASE 2 AS AN INSULIN SENSITIVITY GENE	125	ISI	STANFORD UNIVERSITY;UNIVERSITY OF EXETER MEDICAL SCHOOL;ICAHN SCHOOL OF MEDICINE AT MOUNT SINAI;UNIVERSITY OF EASTERN FINLAND;LUND UNIVERSITY;UNIVERSITY OF MINNESOTA;CEDARS-SINAI MEDICAL CENTER;UNIVERSITY OF LIVERPOOL;UNIVERSITY OF OXFORD;LOS ANGELES BIOMEDICAL RESEARCH INSTITUTE;UPPSALA UNIVERSITY;MERCK RESEARCH LABS;UPPSALA UNIVERSITY;MEDICAL GENETICS RESEARCH INSTITUTE;UNIVERSITY OF MINNESOTA;…	NOTREPORTED;STANFORD UNIVERSITY;NOTREPORTED		KNOWLES JW, 2015, J CLIN INVEST	KNOWLES JW, 2015, J CLIN INVEST
KOVÁCS P;KLÖTING I	none	THE SPONTANEOUSLY HYPERTENSIVE RAT (SHR/MOL) AND THE SPONTANEOUSLY DIABETIC BB/OK RAT WERE CROSSED, AND THE F1 HYBRIDS WERE BACKCROSSED ONTO THE BB/OK RAT IN ORDER TO SEARCH FOR QUANTITATIVE TRAIT LOCI (QTL) AFFECTING SERUM TOTAL CHOLESTEROL AND TRIGLYCERIDES ON CHROMOSOMES 1, 3, 4, 10, 13, 18, AND X. ON CHROMOSOME 4 A QTL FOR TRIGLYCERIDE LEVELS (LOD SCORE 3.3) WAS FOUND WITHIN THE REGION FLANKE…	DEPT. OF LABORATORY ANIMAL SCIENCES, INSTITUTE OF PATHOPHYSIOLOGY, UNIVERSITY OF GREIFSWALD, 17495, KARLSBURG, GERMANY	CHROMOSOME; LIPIDS; QUANTITATIVE TRAIT LOCUS; RAT	10.1006/abbi.1998.0686	ARTICLE	CHOLESTEROL; TRIACYLGLYCEROL; ANIMAL MODEL; ARTICLE; CHOLESTEROL BLOOD LEVEL; CHROMOSOME 1; CHROMOSOME 4; CORONARY ARTERY DISEASE; GENE LOCUS; GENETIC LINKAGE; HYPERTENSION; LIPID METABOLISM; NON INSULIN DEPENDENT DIABETES MELLITUS; NONHUMAN; PATHOGENESIS; PHENOTYPE; PRIORITY JOURNAL; RAT; TRIACYLGLYCEROL BLOOD LEVEL	ARCH BIOCHEM BIOPHYS	ARCH. BIOCHEM. BIOPHYS.	ENGLISH	ACADEMIC PRESS INC.	1998	I. KLOTING; DEPT. OF LABORATORY ANIMAL SCIENCES, INSTITUTE OF PATHOPHYSIOLOGY, UNIVERSITY OF GREIFSWALD, 17495 KARLSBURG, GERMANY; EMAIL: KLOETING@RZ.UNI-GREIFSWALD.DE	00039861	ARCHIVES OF BIOCHEMISTRY AND BIOPHYSICS	29	QUANTITATIVE TRAIT LOCI ON CHROMOSOMES 1 AND 4 AFFECT LIPID PHENOTYPES IN THE RAT	354	ISI	UNIVERSITY OF GREIFSWALD	NOTREPORTED;UNIVERSITY OF GREIFSWALD;NOTREPORTED		KOVÁCS P, 1998, ARCH BIOCHEM BIOPHYS	KOVÁCS P, 1998, ARCH BIOCHEM BIOPHYS
KRANTZ S;STELTER F;LOBER M;GROMOLL B	BRESLOW JL, 1985, ANNU REV BIOCHEM, V54, P699, DOI 10.1146/ANNUREV.BI.54.070185.003411;GESERICK G, 1977, FORTSCHRITTE HAMATOL, V4, P13;KRANTZ S, 1988, EXPERIMENTAL AND CLINICAL ENDOCRINOLOGY, V92, P287;OLAISEN B, 1982, HUM GENET, V62, P233, DOI 10.1007/BF00333526;PORTER RR, 1984, CRC CR REV BIOCH MOL, V16, P1, DOI 10.3109/10409238409102804;TEISBERG P, 1970, VOX SANG, V19, P47, DOI 10.1111/J.1423-…	COMPLEMENT COMPONENT 3 (C3) PHENOTYPE AND ALLELE FREQUENCIES WERE DEFINED IN 312 PATIENTS WITH TYPE-1 DIABETES (INSULIN-DEPENDENT DIABETES MELLITUS). 256 PATIENTS WITH TYPE-2 DIABETES (NON-INSULIN-DEPENDENT DIABETES MELLITUS). 114 APPARENTLY NON-DIABETIC FIRST-DEGREE RELATIVES OF TYPE-1 DIABETICS, IN 10 FAMILIES (29 MEMBERS) WITH A FAMILIAL HISTORY OF TYPE-1 OR TYPE-2 DIABETES, IN 181 PATIENTS WI…				ARTICLE; PROCEEDINGS PAPER	APOLIPOPROTEIN-E; LOCUS	BIOMED BIOCHIM ACTA		ENGLISH	AKADEMIE VERLAG GMBH	1990	KRANTZ, S (CORRESPONDING AUTHOR), UNIV GREIFSWALD,INST BIOCHEM,O-2200 GREIFSWALD,GERMANY.	0232-766X	BIOMEDICA BIOCHIMICA ACTA	7	COMPLEMENT COMPONENT3 C3 GENETICS AND DIABETESMELLITUS	49	ISI	UNIV GREIFSWALD	UNIV GREIFSWALD		KRANTZ S, 1990, BIOMED BIOCHIM ACTA	KRANTZ S, 1990, BIOMED BIOCHIM ACTA
KUCHARSKA-NEWTON A;MONDA K;BIELINSKI S;BOERWINKLE E;REA T;ROSAMOND W;PANKOW J;KÖTTGEN A;HEISS G;NORTH K	none	WE EXAMINED THE ASSOCIATION OF VARIATION IN THE TYPE 2 DIABETES RISK-CONFERRING TCF7L2 GENE WITH THE RISK OF INCIDENT CORONARY HEART DISEASE (CHD) AMONG THE LEAN, OVERWEIGHT, AND OBESE MEMBERS OF THE ATHEROSCLEROSIS RISK IN COMMUNITIES (ARIC) STUDY COHORT. COX PROPORTIONAL HAZARD REGRESSION ANALYSES WERE PERFORMED USING A GENERAL MODEL, WITH THE MAJOR HOMOZYGOTE AS THE REFERENCE CATEGORY. FOR 9,8…	DEPARTMENT OF EPIDEMIOLOGY, GILLINGS SCHOOL OF GLOBAL PUBLIC HEALTH, UNIVERSITY OF NORTH CAROLINA AT CHAPEL HILL, CHAPEL HILL, NC 27514, UNITED STATES; DIVISION OF EPIDEMIOLOGY, DEPARTMENT OF HEALTH SERVICES RESEARCH, MAYO CLINIC, ROCHESTER, MN 55905, UNITED STATES; HUMAN GENETICS CENTER, DIVISION OF EPIDEMIOLOGY, UNIVERSITY OF TEXAS, HOUSTON, TX 77225, UNITED STATES; DEPARTMENT OF MEDICINE, UNIV…		10.1155/2010/651903	ARTICLE		J OBES	J. OBES.	ENGLISH	HINDAWI PUBLISHING CORPORATION	2010	A.M. KUCHARSKA-NEWTON; DEPARTMENT OF EPIDEMIOLOGY, GILLINGS SCHOOL OF GLOBAL PUBLIC HEALTH, UNIVERSITY OF NORTH CAROLINA AT CHAPEL HILL, CHAPEL HILL, NC 27514, UNITED STATES; EMAIL: ANNA_NEWTON@UNC.EDU	20900708	JOURNAL OF OBESITY	12	ROLE OF BMI IN THE ASSOCIATION OF THE TCF7L2 RS7903146 VARIANT WITH CORONARY HEART DISEASE THE ATHEROSCLEROSIS RISK IN COMMUNITIES ARIC STUDY	2010	ISI	UNIVERSITY OF NORTH CAROLINA AT CHAPEL HILL;DEPARTMENT OF HEALTH SERVICES RESEARCH;UNIVERSITY OF TEXAS;UNIVERSITY OF WASHINGTON;UNIVERSITY OF MINNESOTA;JOHNS HOPKINS UNIVERSITY	NOTREPORTED;UNIVERSITY OF NORTH CAROLINA AT CHAPEL HILL;NOTREPORTED		KUCHARSKA-NEWTON AM, 2010, J OBES	KUCHARSKA-NEWTON AM, 2010, J OBES
KUCUKHUSEYIN O;TOPTAS B;TIMIRCI-KAHRAMAN O;ISBIR S;KARSIDAG K;ISBIR T	none	AIM: THE PRESENT STUDY INVESTIGATED THE EFFECTS OF GROWTH HORMONE (GH), INSULIN-LIKE GROWTH FACTOR-1 (IGF-1), INSULIN-LIKE GROWTH FACTOR BINDING PROTEIN-3 (IGFBP-3) AND GH-RECEPTOR (GHR)/EXON-3 POLYMORPHISM ON DIABETES MELLITUS (DM) AND CORONARY HEART DISEASE (CHD) PATIENTS. PATIENTS AND METHODS: NINETY PATIENTS WITH CHD, 90 PATIENTS WITH DM AND 96 CONTROLS WERE INCLUDED IN THIS STUDY. THE GH, IG…	ISTANBUL UNIVERSITY, INSTITUTE OF EXPERIMENTAL MEDICINE, DEPARTMENT OF MOLECULAR MEDICINE, VAKIF GUREBA STREET, CAPA-ISTANBUL, TURKEY; DEPARTMENT OF CARDIOVASCULAR SURGERY, MARMARA UNIVERSITY SCHOOL OF MEDICINE, ISTANBUL, TURKEY; DEPARTMENT OF INTERNAL MEDICINE, DIVISION OF ENDOCRINOLOGY AND METABOLISM, ISTANBUL UNIVERSITY, ISTANBUL, TURKEY; DEPARTMENT OF MEDICAL BIOLOGY, YEDITEPE UNIVERSITY, FAC…	CORONARY HEART DISEASE; DIABETES MELLITUS; GH; GHR; IGF-1; IGFBP-3; POLYMORPHISM		ARTICLE	AGED; CORONARY DISEASE; DIABETES MELLITUS; TYPE 2; FEMALE; GENE FREQUENCY; GENETIC ASSOCIATION STUDIES; GENETIC PREDISPOSITION TO DISEASE; GROWTH HORMONE; HUMANS; INSULIN; INSULIN-LIKE GROWTH FACTOR BINDING PROTEIN 3; INSULIN-LIKE GROWTH FACTOR I; MALE; MIDDLE AGED; POLYMORPHISM; GENETIC; RECEPTORS; SOMATOTROPIN; RISK FACTORS; GROWTH HORMONE; GROWTH HORMONE RECEPTOR; INSULIN; SOMATOMEDIN BINDING …	IN VIVO	IN VIVO	ENGLISH	INTERNATIONAL INSTITUTE OF ANTICANCER RESEARCH	2015	O. KUCUKHUSEYIN; ISTANBUL UNIVERSITY, INSTITUTE OF EXPERIMENTAL MEDICINE, DEPARTMENT OF MOLECULAR MEDICINE, CAPA-ISTANBUL, VAKIF GUREBA STREET, TURKEY; EMAIL: OZLEM.KH@GMAIL.COM	0258851X	IN VIVO	2	THE EFFECT OF GHREXON3 POLYMORPHISM AND SERUM GH IGF1 AND IGFBP3 LEVELS IN DIABETES AND CORONARY HEART DISEASE	29	ISI	ISTANBUL UNIVERSITY;MARMARA UNIVERSITY SCHOOL OF MEDICINE;ISTANBUL UNIVERSITY;YEDITEPE UNIVERSITY	NOTREPORTED;ISTANBUL UNIVERSITY;NOTREPORTED		KUCUKHUSEYIN O, 2015, IN VIVO	KUCUKHUSEYIN O, 2015, IN VIVO
KUREK J;MIKOLAJCZYK-STECYNA J;KREJPCIO Z	AKBARI F, 2018, CELL MOL BIOL, V64, P11, DOI 10.14715/CMB/2018.64.2.3;ALLIANCE OF GENOME RESOURCES, FASN. AVAILABLE ONLINE: ALLIANCEGENOME.ORG/GENE/ RGD:620665;ALLIANCE OF GENOME RESOURCES, EGR1;ALLIANCE OF GENOME RESOURCES, PPARGAMMA;ALLIANCE OF GENOME RESOURCES, GLUT4;ALLIANCE OF GENOME RESOURCES, LPL;AMER DIABET ASSOC, 2013, DIABETES CARE, V36, PS67, DOI 10.2337/DC13-S067, 10.2337/DC14-S081, 1…	IN DIABETES, IN PARALLEL TO HYPERGLYCAEMIA, ELEVATED SERUM LIPIDS ARE ALSO DIAGNOSED, REPRESENTING A HIGH-RISK FACTOR FOR CORONARY HEART DISEASE AND CARDIOVASCULAR COMPLICATIONS. THE OBJECTIVE OF THIS STUDY WAS TO UNRAVEL THE MECHANISMS THAT UNDERLIE THE POTENTIAL OF STEVIOL GLYCOSIDES (STEVIOSIDE OR REBAUDIOSIDE A) ADMINISTERED AT TWO DOSES (500 OR 2500 MG/KG BODY WEIGHT FOR 5 WEEKS) TO REGULATE…	POZNAN UNIV LIFE SCI, DEPT HUMAN NUTR & DIETET, WOJSKA POLSKIEGO 31, PL-60624 POZNAN, POLAND.;	STEVIA; STEVIOL GLYCOSIDES; GENE EXPRESSION; LIPID METABOLISM; DIABETES; RATS	10.1016/j.biopha.2023.115424	ARTICLE	DE-NOVO LIPOGENESIS; ADIPOSE-TISSUE; TRANSCRIPTION FACTORS; BIOSYNTHESIS PATHWAY; GLUCOSE-HOMEOSTASIS; PPAR-GAMMA; INSULIN-RESISTANCE; FATTY LIVER; EGR1; RATS	BIOMED PHARMACOTHER	BIOMED. PHARMACOTHER.	ENGLISH	ELSEVIER FRANCE-EDITIONS SCIENTIFIQUES MEDICALES ELSEVIER	2023	KUREK, JM (CORRESPONDING AUTHOR), POZNAN UNIV LIFE SCI, DEPT HUMAN NUTR & DIETET, WOJSKA POLSKIEGO 31, PL-60624 POZNAN, POLAND.	0753-3322	BIOMEDICINE & PHARMACOTHERAPY	0	STEVIOL GLYCOSIDES FROMI STEVIAII REBAUDIANAI BERTONI MITIGATE LIPID METABOLISM ABNORMALITIES IN DIABETES BY MODULATING SELECTED GENE EXPRESSION ANI INII VIVOI STUDY	166	ISI	POZNAN UNIVERSITY OF LIFE SCIENCES	POZNAN UNIV LIFE SCI		KUREK JM, 2023, BIOMED PHARMACOTHER	KUREK JM, 2023, BIOMED PHARMACOTHER
LACQUEMANT C;LEPRETRE F;PINEDA T I;MANRAJ M;CHARPENTIER G;RUIZ J;STAELS B;FROGUEL P	none	THE PEROXISOME PROLIFERATOR-ACTIVATED RECEPTOR ALPHA (PPARΑ) IS A LIGAND-ACTIVATED TRANSCRIPTION FACTOR BELONGING TO THE NUCLEAR HORMONE RECEPTOR SUPERFAMILY. PPARΑ PLAYS A KEY ROLE IN LIPID AND GLUCOSE METABOLISM, INFLAMMATORY RESPONSE AND ENERGY HOMEOSTASIS. THE AIM OF OUR STUDY WAS TO SCREEN THE PPARΑ GENE FOR MUTATIONS, AND TO TEST THE GENETIC CONTRIBUTION OF PPARΑ IN DIABETES AND ITS VASCULA…	LGMM UPRES A 8090, INSTITUT DE BIOLOGIE DE LILLE, 59019 LILLE CEDEX, 1, RUE DU PR. CALMETTE, FRANCE	CHD; GENE; PLASMA LIPIDS; PPARΑ; TYPE 2 DIABETES		ARTICLE	AMINO ACID SUBSTITUTION; CORONARY DISEASE; DIABETES MELLITUS; TYPE 2; DIABETIC ANGIOPATHIES; DNA-BINDING PROTEINS; EUROPEAN CONTINENTAL ANCESTRY GROUP; FEMALE; GENETIC SCREENING; HUMANS; INDIA; MALE; MAURITIUS; MIDDLE AGED; MUTATION; POLYMERASE CHAIN REACTION; POLYMORPHISM; GENETIC; POLYMORPHISM; RESTRICTION FRAGMENT LENGTH; PREVALENCE; RECEPTORS; CYTOPLASMIC AND NUCLEAR; TRANSCRIPTION FACTORS; V…	DIABETES METAB	DIABETES METAB.	ENGLISH		2000	P.H. FROGUEL; LGMM UPRES A 8090, INSTITUT DE BIOLOGIE DE LILLE, 59019 LILLE CEDEX, 1, RUE DU PR. CALMETTE, FRANCE; EMAIL: PHILIPPE.FROGUEL@MAIL-GOOD.PASTEUR-LILLE.FR	12623636	DIABETES AND METABOLISM	79	MUTATION SCREENING OF THE PPAR GENE IN TYPE 2 DIABETES ASSOCIATED WITH CORONARY HEART DISEASE	26	ISI	RUE DU PR. CALMETTE	NOTREPORTED;INSTITUT DE BIOLOGIE DE LILLE;NOTREPORTED		LACQUEMANT C, 2000, DIABETES METAB	LACQUEMANT C, 2000, DIABETES METAB
LAZAREVIC G;MILOJKOVIC M;TASIC I;NAJMAN S;ANTIC S;STEFANOVIC V	none	AIM - THE AIM OF THE PRESENT STUDY WAS TO INVESTIGATE THE PREVALENCE OF THE PC-1 121Q ALLELE AND TO TEST ITS ASSOCIATION TO CARDIOVASCULAR RISK FACTORS IN TYPE 2 DIABETES MELLITUS (DM) PATIENTS. METHODS - A TOTAL OF 103 UNRELATED CAUCASIANS FROM SERBIA, INCLUDING 71 DM PATIENTS WITHOUT CHD (AGED 59.4 ± 8.9 YEARS, WITH A MEAN BODY MASS INDEX (BMI) OF 33.3 ±4.8 KG/M 2) AND 32 DM PATIENTS WHO SUFFER…	CLINIC OF CARDIOVASCULAR DISEASES, CLINICAL CENTRE; INSTITUTE OF PATHOPHYSIOLOGY, FACULTY OF MEDICINE; INSTITUTE OF CARDIOVASCULAR AND RHEUMATIC DISEASES NISKA BANJA, FACULTY OF MEDICINE; INSTITUTE OF BIOLOGY, FACULTY OF MEDICINE; CLINIC OF ENDOCRINOLOGY, CLINICAL CENTRE; INSTITUTE OF NEPHROLOGY AND HAEMODIALYSIS, FACULTY OF MEDICINE, NIS, SERBIA, MACEDONIA; INSTITUTE OF NEPHROLOGY AND HAEMODIALI…	CORONARY HEART DISEASE; PC-1 121Q POLYMORPHISM; POLYMERASE CHAIN REACTION; TYPE 2 DIABETES MELLITUS	10.2143/AC.63.3.1020308	ARTICLE	ALLELES; CORONARY DISEASE; CROSS-SECTIONAL STUDIES; DIABETES MELLITUS; TYPE 2; DNA; FEMALE; FOLLOW-UP STUDIES; GENE FREQUENCY; GENOTYPE; HUMANS; MALE; MIDDLE AGED; NEPHELOMETRY AND TURBIDIMETRY; OBESITY; OVERWEIGHT; PHOSPHORIC DIESTER HYDROLASES; POLYMERASE CHAIN REACTION; POLYMORPHISM; GENETIC; PREVALENCE; PROGNOSIS; PYROPHOSPHATASES; RISK FACTORS; YUGOSLAVIA; ADULT; ALLELE; ARTICLE; BODY MASS; …	ACTA CARDIOL	ACTA CARDIOL.	ENGLISH		2008	V. STEFANOVIC; INSTITUTE OF NEPHROLOGY AND HAEMODIALISYS, FACULTY OF MEDICINE, 18000 NIS, SERBIA, BUI. ZORANA DJINDJICA 81, MACEDONIA; EMAIL: STEFAN@NI.AC.YU	00015385	ACTA CARDIOLOGICA	3	PC1 ENPP1 K121Q POLYMORPHISM IN OVERWEIGHT AND OBESE TYPE 2 DIABETIC CORONARY HEART DISEASE PATIENTS	63	ISI	CLINICAL CENTRE;INSTITUTE OF PATHOPHYSIOLOGY;INSTITUTE OF CARDIOVASCULAR AND RHEUMATIC DISEASES NISKA BANJA;INSTITUTE OF BIOLOGY;CLINICAL CENTRE;INSTITUTE OF NEPHROLOGY AND HAEMODIALYSIS;INSTITUTE OF NEPHROLOGY AND HAEMODIALISYS	NOTREPORTED;INSTITUTE OF NEPHROLOGY AND HAEMODIALISYS;NOTREPORTED		LAZAREVIC G, 2008, ACTA CARDIOL	LAZAREVIC G, 2008, ACTA CARDIOL
LEE J;CHEONG H;SHIN H	BAE SUNGHWAN, 2016, GENOMICS & INFORMATICS, V14, P149, DOI 10.5808/GI.2016.14.4.149;BARRETT JC, 2005, BIOINFORMATICS, V21, P263, DOI 10.1093/BIOINFORMATICS/BTH457;BONACCORSO S, 2015, BIPOLAR DISORD, V17, P528, DOI 10.1111/BDI.12294;CHA SW, 2008, OBESITY, V16, P2185, DOI 10.1038/OBY.2008.314;CHA S, 2011, EVID-BASED COMPL ALT, V2011, DOI 10.1093/ECAM/NEP162;CHEN HY, 2011, PLOS ONE, V6, DOI 10.1371/…	BACKGROUND. BODY MASS INDEX (BMI) IS WIDELY REGARDED AS AN IMPORTANT CLINICAL TRAIT FOR OBESITY AND OTHER DISEASES SUCH AS TYPE 2 DIABETES, CORONARY HEART DISEASE, AND OSTEOARTHRITIS. METHODS. THIS STUDY USES 6,011 SAMPLES OF GENOTYPE DATA FROM ETHNIC KOREAN SUBJECTS. THE DATA WAS RETRIEVED FROM THE KOREA ASSOCIATION RESOURCE. TO IDENTIFY THE BMI-RELATED MARKERS WITHIN THE KOREAN POPULATION, WE C…	SOGANG UNIV, RES INST BASIC SCI, SEOUL, SOUTH KOREA.; SOGANG UNIV, DEPT LIFE SCI, SEOUL, SOUTH KOREA.; SNP GENET INC, DEPT GENET EPIDEMIOL, SEOUL, SOUTH KOREA.;	BMI; PREDICTION; WGRS	10.7717/peerj.3510	ARTICLE	BODY-MASS INDEX; GENOME-WIDE ASSOCIATION; GENETIC RISK SCORE; VAL66MET POLYMORPHISM; VARIANTS; COMMON; FTO; VISUALIZATION; TRAITS; LOCI	PEERJ	PEERJ	ENGLISH	PEERJ INC	2017	SHIN, HD (CORRESPONDING AUTHOR), SOGANG UNIV, RES INST BASIC SCI, SEOUL, SOUTH KOREA.; SHIN, HD (CORRESPONDING AUTHOR), SOGANG UNIV, DEPT LIFE SCI, SEOUL, SOUTH KOREA.; CHEONG, HS; SHIN, HD (CORRESPONDING AUTHOR), SNP GENET INC, DEPT GENET EPIDEMIOL, SEOUL, SOUTH KOREA.	2167-8359	PEERJ	7	BMI PREDICTION WITHIN A KOREAN POPULATION	5	ISI	SOGANG UNIVERSITY; SOGANG UNIVERSITY; SNP GENETICS	SOGANG UNIV;SOGANG UNIV;NOTREPORTED;HD (CORRESPONDING AUTHOR)		LEE JS, 2017, PEERJ	LEE JS, 2017, PEERJ
LEONG A;COLE J;BRENNER L;MEIGS J;FLOREZ J;MERCADER J	AKALIN E, 2020, NEW ENGL J MED, V382, P2475, DOI 10.1056/NEJMC2011117;ALTSHULER DM, 2012, NATURE, V491, P56, DOI 10.1038/NATURE11632;BAI Y, 2020, JAMA-J AM MED ASSOC, V323, P1406, DOI 10.1001/JAMA.2020.2565;BODE B, 2020, J DIABETES SCI TECHN, V14, P813, DOI 10.1177/1932296820924469;BOWDEN J, 2017, STAT MED, V36, P1783, DOI 10.1002/SIM.7221;BOWDEN J, 2016, GENET EPIDEMIOL, V40, P304, DOI 10.1002/G…	AUTHOR SUMMARY WHY WAS THIS STUDY DONE? DIVERSE CARDIOMETABOLIC RISK FACTORS HAVE BEEN DESCRIBED IN THE LITERATURE TO BE ASSOCIATED WITH COVID-19 ILLNESS, BUT CAUSALITY HAS NOT BEEN ESTABLISHED. PREVENTIVE STRATEGIES TARGETING CARDIOMETABOLIC RISK FACTORS THAT ARE BOTH CAUSAL AND MODIFIABLE MAY REDUCE THE RISK OF COVID-19 ILLNESS, WHEREAS INTERVENTIONS TARGETING RISK FACTORS THAT ARE ONLY CORRELA…	HARVARD MED SCH, DEPT MED, BOSTON, MA 02115 USA.; MASSACHUSETTS GEN HOSP, DIV GEN INTERNAL MED, BOSTON, MA 02114 USA.; BROAD INST MIT & HARVARD, PROGRAMS METAB & MED & POPULAT GENET, CAMBRIDGE, MA 02142 USA.; MASSACHUSETTS GEN HOSP, DIABET UNIT, BOSTON, MA 02114 USA.; MASSACHUSETTS GEN HOSP, CTR GENOM MED, BOSTON, MA 02114 USA.; BOSTON CHILDRENS HOSP, DIV ENDOCRINOL, BOSTON, MA USA.; BOSTON CHILD…		10.1371/journal.pmed.1003553	ARTICLE	LOCI	PLOS MED	PLOS MED.	ENGLISH	PUBLIC LIBRARY SCIENCE	2021	LEONG, A; MERCADER, JM (CORRESPONDING AUTHOR), HARVARD MED SCH, DEPT MED, BOSTON, MA 02115 USA.; LEONG, A (CORRESPONDING AUTHOR), MASSACHUSETTS GEN HOSP, DIV GEN INTERNAL MED, BOSTON, MA 02114 USA.; LEONG, A; MERCADER, JM (CORRESPONDING AUTHOR), BROAD INST MIT & HARVARD, PROGRAMS METAB & MED & POPULAT GENET, CAMBRIDGE, MA 02142 USA.; LEONG, A; MERCADER, JM (CORRESPONDING AUTHOR), MASSACHUSETTS GE…	1549-1277	PLOS MEDICINE	67	CARDIOMETABOLIC RISK FACTORS FOR COVID19 SUSCEPTIBILITY AND SEVERITY A MENDELIAN RANDOMIZATION ANALYSIS	18	ISI	HARVARD UNIVERSITY; HARVARD MEDICAL SCHOOL; HARVARD UNIVERSITY; MASSACHUSETTS GENERAL HOSPITAL; HARVARD UNIVERSITY; MASSACHUSETTS INSTITUTE OF TECHNOLOGY (MIT); BROAD INSTITUTE; HARVARD UNIVERSITY; MASSACHUSETTS GENERAL HOSPITAL; HARVARD UNIVERSITY; MASSACHUSETTS GENERAL HOSPITAL; HARVARD UNIVERSITY; BOSTON CHILDREN'S HOSPITAL; HARVARD UNIVERSITY; BOSTON CHILDREN'S HOSPITAL; HARVARD UNIVERSITY; M…	NOTREPORTED;HARVARD MED SCH;MASSACHUSETTS GEN HOSP;NOTREPORTED;BROAD INST MIT AND HARVARD;NOTREPORTED;MASSACHUSETTS GEN HOSP;NOTREPORTED;CTR GENOM MED		LEONG A, 2021, PLOS MED	LEONG A, 2021, PLOS MED
LETTRE G;PALMER C;YOUNG T;EJEBE K;ALLAYEE H;BENJAMIN E;BENNETT F;BOWDEN D;CHAKRAVARTI A;DREISBACH A;FARLOW D;FOLSOM A;FORNAGE M;FORRESTER T;FOX E;HAIMAN C;HARTIALA J;HARRIS T;HAZEN S;HECKBERT S;HENDERSON B;HIRSCHHORN J;KEATING B;KRITCHEVSKY S;LARKIN E;LI M;RUDOCK M;MCKENZIE C;MEIGS J;MENG Y;MOSLEY T;NEWMAN A;NEWTON-CHEH C;PALTOO D;PAPANICOLAOU G;PATTERSON N;POST W;PSATY B;QASIM A;QU L;RADER D;RED…	ADEYEMO A, 2009, PLOS GENET, V5, DOI 10.1371/JOURNAL.PGEN.1000564;AULCHENKO YS, 2009, NAT GENET, V41, P47, DOI 10.1038/NG.269;BURTON PR, 2007, NATURE, V447, P661, DOI 10.1038/NATURE05911;CHEN MH, 2009, BIOINFORMATICS;CHEN MH, 2010, BIOINFORMATICS, V26, P580, DOI 10.1093/BIOINFORMATICS/BTP710;COOPER R, 1997, AM J HYPERTENS, V10, P804, DOI 10.1016/S0895-7061(97)00211-2;COOPER R S, 2001, CURR HYPERT…	CORONARY HEART DISEASE (CHD) IS THE LEADING CAUSE OF MORTALITY IN AFRICAN AMERICANS. TO IDENTIFY COMMON GENETIC POLYMORPHISMS ASSOCIATED WITH CHD AND ITS RISK FACTORS (LDL- AND HDL-CHOLESTEROL (LDL-C AND HDL-C), HYPERTENSION, SMOKING, AND TYPE-2 DIABETES) IN INDIVIDUALS OF AFRICAN ANCESTRY, WE PERFORMED A GENOME-WIDE ASSOCIATION STUDY (GWAS) IN 8,090 AFRICAN AMERICANS FROM FIVE POPULATION-BASED C…	MONTREAL HEART INST, MONTREAL, PQ H1T 1C8, CANADA.; UNIV MONTREAL, DEPT MED, MONTREAL, PQ H3C 3J7, CANADA.; BROAD INST, PROGRAM MED & POPULAT GENET, CAMBRIDGE, MA USA.; CHILDRENS HOSP, DIV GENET, BOSTON, MA 02115 USA.; CHILDRENS HOSP, DIV ENDOCRINOL, BOSTON, MA 02115 USA.; CHILDRENS HOSP, PROGRAM GENOM, BOSTON, MA 02115 USA.; UNIV SO CALIF, KECK SCH MED, DEPT PREVENT MED, LOS ANGELES, CA 90033 US…		10.1371/journal.pgen.1001300	ARTICLE	LOCI; VARIANTS; METAANALYSIS	PLOS GENET	PLOS GENET.	ENGLISH	PUBLIC LIBRARY SCIENCE	2011	LETTRE, G (CORRESPONDING AUTHOR), MONTREAL HEART INST, MONTREAL, PQ H1T 1C8, CANADA.	1553-7404	PLOS GENETICS	238	GENOMEWIDE ASSOCIATION STUDY OF CORONARY HEART DISEASE AND ITS RISK FACTORS IN 8090 AFRICAN AMERICANS THE NHLBI CARE PROJECT	7	ISI	UNIVERSITE DE MONTREAL; UNIVERSITE DE MONTREAL; HARVARD UNIVERSITY; MASSACHUSETTS INSTITUTE OF TECHNOLOGY (MIT); BROAD INSTITUTE; HARVARD UNIVERSITY; BOSTON CHILDREN'S HOSPITAL; HARVARD UNIVERSITY; BOSTON CHILDREN'S HOSPITAL; HARVARD UNIVERSITY; BOSTON CHILDREN'S HOSPITAL; UNIVERSITY OF SOUTHERN CALIFORNIA; BOSTON UNIVERSITY; BOSTON UNIVERSITY; FRAMINGHAM HEART STUDY; NATIONAL INSTITUTES OF HEALT…	MONTREAL HEART INST		LETTRE G, 2011, PLOS GENET	LETTRE G, 2011, PLOS GENET
LI C;LIU Z	AGHADAVOD E, 2020, IRAN J KIDNEY DIS, V14, P31;AMINIAN A, 2009, EUR J INTERN MED, V20, P527, DOI 10.1016/J.EJIM.2009.05.008;BAKER EN, 2009, BIOCHIMIE, V91, P3, DOI 10.1016/J.BIOCHI.2008.05.006;BAKER EN, 2005, CELL MOL LIFE SCI, V62, P2531, DOI 10.1007/S00018-005-5368-9;CALIGIURI G, 2020, CIRC RES, V126, P1178, DOI 10.1161/CIRCRESAHA.120.315935;CHEN F, 2005, INT J MOL MED, V15, P57;CHEN Q, 2019, T…	BACKGROUND: TYPE 2 DIABETES MELLITUS (T2DM), A MAJOR RISK FACTOR OF CORONARY HEART DISEASE, IS ASSOCIATED WITH AN APPROXIMATELY TWOFOLD INCREASE IN THE RISK OF MYOCARDIAL INFARCTION (MI). WE STUDIED CO-EXPRESSED GENES TO DEMONSTRATE RELATIONSHIPS BETWEEN DM AND MI AND REVEALED THE POTENTIAL BIOMARKERS AND THERAPEUTIC TARGETS OF T2DM-RELATED MI. METHODS: DM AND MI-RELATED DIFFERENTIALLY EXPRESSED …	CENT SOUTH UNIV, XIANGYA HOSP, DEPT CARDIOVASC MED, CHANGSHA, HUNAN, PEOPLES R CHINA.; CENT SOUTH UNIV, XIANGYA HOSP 3, DEPT GERIATR, CHANGSHA, HUNAN, PEOPLES R CHINA.;	MYOCARDIAL INFARCTION; DIABETES MELLITUS; GENE EXPRESSION OMNIBUS; DIFFERENTIALLY EXPRESSED GENES; PROTEIN-PROTEIN INTERACTION	10.2147/IJGM.S325980	ARTICLE	ISCHEMIC-HEART-DISEASE; MYOCARDIAL-INFARCTION; MATRIX-METALLOPROTEINASE-9 EXPRESSION; DIABETES-MELLITUS; OXIDATIVE STRESS; PECAM-1; MYELOPEROXIDASE; PLAQUE; ROLES; RISK	INT J GEN MED	INT. J. GEN. MED.	ENGLISH	DOVE MEDICAL PRESS LTD	2021	LIU, ZY (CORRESPONDING AUTHOR), CENT SOUTH UNIV, XIANGYA HOSP 3, 138 TONGZIPUO RD, CHANGSHA 410013, HUNAN, PEOPLES R CHINA.		INTERNATIONAL JOURNAL OF GENERAL MEDICINE	2	BIOINFORMATIC ANALYSIS FOR POTENTIAL BIOMARKERS AND THERAPEUTIC TARGETS OF T2DMRELATED MI	14	ISI	CENTRAL SOUTH UNIVERSITY; CENTRAL SOUTH UNIVERSITY	CENT SOUTH UNIV		LI C, 2021, INT J GEN MED	LI C, 2021, INT J GEN MED
LI W;ZHU L;HUANG H;HE Y;LV J;LI W;CHEN L;HE W	ADZHUBEI IVAN, 2013, CURR PROTOC HUM GENET, VCHAPTER 7, DOI 10.1002/0471142905.HG0720S76;AGARWAL AK, 2011, J BIOL CHEM, V286, P37676, DOI 10.1074/JBC.M111.250449;AHLUWALIA TS, 2015, J CLIN ENDOCR METAB, V100, PE664, DOI 10.1210/JC.2014-3677;ANONYMOUS, MOL BIOL EVOL;ANONYMOUS, ONCOTARGET;ASHBURNER M, 2000, NAT GENET, V25, P25, DOI 10.1038/75556;AZENCOTT CA, 2013, BIOINFORMATICS, V29, P171, DOI 10.…	COMPLEX CHRONIC DISEASES ARE CAUSED BY THE EFFECTS OF GENETIC AND ENVIRONMENTAL FACTORS. SINGLE NUCLEOTIDE POLYMORPHISMS (SNPS), ONE COMMON TYPE OF GENETIC VARIATIONS, PLAYED VITAL ROLES IN DISEASES. WE HYPOTHESIZED THAT DISEASE RISK FUNCTIONAL SNPS IN CODING REGIONS AND PROTEIN INTERACTION NETWORK MODULES WERE MORE LIKELY TO CONTRIBUTE TO THE IDENTIFICATION OF DISEASE SUSCEPTIBLE GENES FOR COMPL…	HARBIN MED UNIV, COLL BIOINFORMAT SCI & TECHNOL, HARBIN, HEILONGJIANG, PEOPLES R CHINA.; HARBIN MED UNIV, DEPT CARDIOL, AFFILIATED HOSP 1, HARBIN, HEILONGJIANG, PEOPLES R CHINA.; HARBIN INST TECHNOL, INST OPTOELECT, HARBIN, HEILONGJIANG, PEOPLES R CHINA.;	COMPLEX CHRONIC DISEASES; DISEASE RISK SNPS; FUNCTIONAL SNPS; NETWORK MODULES; FUNCTIONAL ENRICHMENT ANALYSIS	10.1016/j.jbi.2017.09.006	ARTICLE	GENOME-WIDE ASSOCIATION; BLOOD-PRESSURE; CARDIOVASCULAR-DISEASE; MOLECULAR NETWORKS; PATHWAYS; EXPRESSION; METAANALYSIS; PHENOTYPE; DISCOVERY; KNOWLEDGE	J BIOMED INFORM	J. BIOMED. INFORM.	ENGLISH	ACADEMIC PRESS INC ELSEVIER SCIENCE	2017	CHEN, LN (CORRESPONDING AUTHOR), HARBIN MED UNIV, COLL BIOINFORMAT SCI & TECHNOL, HARBIN, HEILONGJIANG, PEOPLES R CHINA.; LI, WM (CORRESPONDING AUTHOR), HARBIN MED UNIV, DEPT CARDIOL, AFFILIATED HOSP 1, HARBIN, HEILONGJIANG, PEOPLES R CHINA.	1532-0464	JOURNAL OF BIOMEDICAL INFORMATICS	5	IDENTIFICATION OF SUSCEPTIBLE GENES FOR COMPLEX CHRONIC DISEASES BASED ON DISEASE RISK FUNCTIONAL SNPS AND INTERACTION NETWORKS	74	ISI	HARBIN MEDICAL UNIVERSITY; HARBIN MEDICAL UNIVERSITY; HARBIN INSTITUTE OF TECHNOLOGY	HARBIN MED UNIV;HARBIN MED UNIV		LI W, 2017, J BIOMED INFORM	LI W, 2017, J BIOMED INFORM
LI Y;CHEN D;ZHANG Y;YI T;WENG H;GONG Y;LI J;HUO Y	ALBERTI KGMM, 1998, DIABETIC MED, V15, P539, DOI 10.1002/(SICI)1096-9136(199807)15:7<539::AID-DIA668>3.0.CO;2-S;AMOUYEL P, 2009, ARTERIOSCL THROM VAS, V29, P774, DOI 10.1161/ATVBAHA.108.181388;ASSIMES TL, 2008, HUM MOL GENET, V17, P2320, DOI 10.1093/HMG/DDN132;BISHOP DT, 2009, NAT GENET, V41, P920, DOI 10.1038/NG.411;BROADBENT HM, 2008, HUM MOL GENET, V17, P806, DOI 10.1093/HMG/DDM352;BURTON PR, …	BACKGROUND: A RECENT GENOME WIDE ASSOCIATION STUDY IN CHINESE HAN POPULATION HAS IMPLICATED RS10757274 A/G POLYMORPHISM ON CHROMOSOME 9P21.3 WAS ASSOCIATED WITH CORONARY HEART DISEASE (CHD), AND DIABETES MAY HAVE A MODIFYING ROLE. IN THIS STUDY, WE AIMED TO EVALUATE THE ASSOCIATION OF THE SNP WITH CHD IN THE PRESENCE AND ABSENCE OF TYPE 2 DIABETES MELLITUS (T2D) IN A CHINESE POPULATION. METHODS A…	PEKING UNIV FIRST HOSP, DEPT CARDIOL, 8 XISHIKU ST, BEIJING 100034, PEOPLES R CHINA.; PEKING UNIV HLTH SCI CTR, SCH PUBL HLTH, BEIJING, PEOPLES R CHINA.;	CORONARY HEART DISEASE; SINGLE NUCLEOTIDE POLYMORPHISM; 9P21; RS10757274		ARTICLE	GENOME-WIDE ASSOCIATION; ARTERY-DISEASE; MYOCARDIAL-INFARCTION; CHROMOSOME 9P21.3; SUSCEPTIBILITY LOCI; RISK; SNPS	INT J CLIN EXP MED	INT. J. CLIN. EXP. MED.	ENGLISH	E-CENTURY PUBLISHING CORP	2016	LI, JP (CORRESPONDING AUTHOR), PEKING UNIV FIRST HOSP, DEPT CARDIOL, 8 XISHIKU ST, BEIJING 100034, PEOPLES R CHINA.	1940-5901	INTERNATIONAL JOURNAL OF CLINICAL AND EXPERIMENTAL MEDICINE	0	ASSOCIATION OF SINGLE NUCLEOTIDE POLYMORPHISM RS10757274 AG WITH CORONARY HEART DISEASE IN THE PRESENCE AND ABSENCE OF DIABETES IN A CHINESE POPULATION	9	ISI	PEKING UNIVERSITY; PEKING UNIVERSITY	PEKING UNIV FIRST HOSP		LI YX, 2016, INT J CLIN EXP MED	LI YX, 2016, INT J CLIN EXP MED
LIN J;HU F;QI L;CURHAN G	ABBOTT KC, 2001, AM J KIDNEY DIS, V37, P366, DOI 10.1053/AJKD.2001.21311;ADAMCZAK M, 2005, CLIN ENDOCRINOL, V62, P114, DOI 10.1111/J.1365-2265.2004.02182.X;ANONYMOUS, 2000, LANCET;BAKER CSR, 2003, J AM COLL CARDIOL, V41, P2114, DOI 10.1016/S0735-1097(03)00487-X;BRENNER BM, 2001, NEW ENGL J MED, V345, P861, DOI 10.1056/NEJMOA011161;BURACZYNSKA MONIKA, 2002, POL ARCH MED WEWN, V108, P725;BURACZYNSK…	BACKGROUND: INCREASED ACTIVATION OF THE RENIN-ANGIOTENSIN SYSTEM (RAS) MAY BE IMPORTANT IN PROMOTING CORONARY HEART DISEASE (CHD) AND RENAL DYSFUNCTION, BUT LIMITED DATA ARE AVAILABLE ON ASSOCIATIONS BETWEEN ANGIOTENSIN TYPE 1 RECEPTOR (AGT1R) AND ANGIOTENSINOGEN (AGT) GENOTYPES IN TYPE 2 DIABETES. METHODS: STUDY PARTICIPANTS WERE DIABETICS FROM THE HEALTH PROFESSIONALS FOLLOW-UP STUDY (HPFS) AND…	HARVARD UNIV, BRIGHAM & WOMENS HOSP, SCH MED, CHANNING LAB,DEPT MED, BOSTON, MA 02115 USA.; HARVARD UNIV, BRIGHAM & WOMENS HOSP, SCH MED, RENAL DIV,DEPT MED, BOSTON, MA 02115 USA.; HARVARD UNIV, SCH PUBL HLTH, DEPT NUTR, BOSTON, MA 02115 USA.; HARVARD UNIV, SCH PUBL HLTH, DEPT EPIDEMIOL, BOSTON, MA 02115 USA.;		10.1186/1471-2369-10-9	ARTICLE	CONVERTING-ENZYME GENE; CARDIOVASCULAR-DISEASE; ESSENTIAL-HYPERTENSION; NEPHROPATHY; RENIN; SYSTEM; ASSOCIATION; M235T; ADIPONECTIN; PROGRESSION	BMC NEPHROL	BMC NEPHROL.	ENGLISH	BMC	2009	LIN, JL (CORRESPONDING AUTHOR), HARVARD UNIV, BRIGHAM & WOMENS HOSP, SCH MED, CHANNING LAB,DEPT MED, BOSTON, MA 02115 USA.	1471-2369	BMC NEPHROLOGY	24	GENETIC POLYMORPHISMS OF ANGIOTENSIN2 TYPE 1 RECEPTOR AND ANGIOTENSINOGEN AND RISK OF RENAL DYSFUNCTION AND CORONARY HEART DISEASE IN TYPE 2 DIABETES MELLITUS	10	ISI	HARVARD UNIVERSITY; BRIGHAM AND WOMEN'S HOSPITAL; HARVARD MEDICAL SCHOOL; HARVARD UNIVERSITY; BRIGHAM AND WOMEN'S HOSPITAL; HARVARD MEDICAL SCHOOL; HARVARD UNIVERSITY; HARVARD T.H. CHAN SCHOOL OF PUBLIC HEALTH; HARVARD UNIVERSITY; HARVARD T.H. CHAN SCHOOL OF PUBLIC HEALTH	HARVARD UNIV		LIN JL, 2009, BMC NEPHROL	LIN JL, 2009, BMC NEPHROL
LIU H;CHEN S;ZHANG S;XIAO C;REN Y;TIAN H;LI X	none	THE AUTHORS INVESTIGATED THE POSSIBLE ASSOCIATION OF -4522C/T VARIATION OF ADIPONECTIN GENE WITH CORONARY HEART DISEASE (CHD) AND TYPE 2 DIABETES MELLITUS (T2DM). GENOTYPING OF SNP -4522C/T IN 304 PATIENTS WITH CHD, 389 PATIENTS WITH T2DM, AND 405 AGE AND SEX-MATCHED HEALTHY CONTROL SUBJECTS WAS CARRIED OUT BY MEANS OF PCR-RFLP APPROACH. NO SIGNIFICANT DIFFERENCE IN THE GENOTYPE OR ALLELE FREQUEN…	DEPARTMENT OF MEDICAL GENETICS, WEST CHINA HOSPITAL, SICHUAN UNIVERSITY, CHENGDU 610041, CHINA; DEPARTMENT OF CELL BIOLOGY AND GENETICS, CENTER OF NEUROSCIENCE, FUJIAN MEDICAL UNIVERSITY, FUZHOU, 350004, CHINA; DEPARTMENT OF MICROBIOLOGY AND IMMUNOLOGY, XIAMEN MEDICAL COLLEGE, XIAMEN, 361001, CHINA; DEPARTMENT OF ENDOCRINOLOGY, WEST CHINA HOSPITAL, SICHUAN UNIVERSITY, CHENGDU, 610041, CHINA	ADIPONECTIN; CORONARY HEART DISEASE; INSULIN RESISTANCE; SINGLE NUCLEOTIDE POLYMORPHISM; TYPE 2 DIABETES	10.1016/S1673-8527(07)60099-X	ARTICLE	ADIPONECTIN; ASIAN CONTINENTAL ANCESTRY GROUP; CASE-CONTROL STUDIES; CORONARY DISEASE; DATABASES; GENETIC; DIABETES MELLITUS; TYPE 2; FEMALE; GENE FREQUENCY; GENETIC PREDISPOSITION TO DISEASE; GENOTYPE; HUMANS; INSULIN RESISTANCE; LIPIDS; MALE; MIDDLE AGED; OBESITY; POLYMORPHISM; SINGLE NUCLEOTIDE; RNA SPLICE SITES; ADIPONECTIN; ADULT; AGED; ARTICLE; CHINESE; CONTROLLED STUDY; FEMALE; GENE FREQUE…	J GENET GENOMICS	J. GENET. GENOMICS	ENGLISH		2007	S. ZHANG; DEPARTMENT OF MEDICAL GENETICS, WEST CHINA HOSPITAL, SICHUAN UNIVERSITY, CHENGDU 610041, CHINA; EMAIL: SZZHANG@MCWCUMS.COM	16738527	JOURNAL OF GENETICS AND GENOMICS	8	ADIPONECTIN GENE VARIATION 4522CT IS ASSOCIATED WITH TYPE 2 DIABETIC OBESITY AND INSULIN RESISTANCE IN CHINESE	34	ISI	SICHUAN UNIVERSITY;FUJIAN MEDICAL UNIVERSITY;XIAMEN MEDICAL COLLEGE;SICHUAN UNIVERSITY	NOTREPORTED;SICHUAN UNIVERSITY;NOTREPORTED		LIU H, 2007, J GENET GENOMICS	LIU H, 2007, J GENET GENOMICS
LIU J;CAI X;XIE L;TANG Y;CHENG J;WANG J;WANG L;GONG J	none	BACKGROUND: CIRCULATING CELL-FREE MTDNA (CCF-MTDNA) IS PRESUMABLY DERIVED FROM INJURED TISSUE OR CELLS IN THE BODY AND HAS BEEN SUGGESTED TO BE A POTENTIAL BIOMARKER IN SEVERAL DISEASES. IN THE PRESENT STUDY, WE INVESTIGATED WHETHER CCF-MTDNA LEVELS COULD SERVE AS A BIOMARKER OF DIABETIC PATIENTS WITHOUT CORONARY HEART DISEASE (CHD) AND CORRELATE WITH THEIR INCIDENCE TO DEVELOP CHD. METHODS: CCF-…	DEPARTMENT OF CARDIOLOGY, NANJING UNIVERSITY SCHOOL OF MEDICINE, JINLING HOSPITAL, NANJING, JIANGSU, 210002, CHINA	CCF-MTDNA; CIRCULATING CELL FREE MITOCHONDRIAL DNA; CORONARY HEART DISEASE; DIABETIC PATIENTS; MITOCHONDRIAL DNA; TYPE 2 DIABETES	10.7754/Clin.Lab.2014.141132	ARTICLE	AGED; AREA UNDER CURVE; CASE-CONTROL STUDIES; CORONARY DISEASE; DIABETES MELLITUS; TYPE 2; DIABETIC ANGIOPATHIES; DNA; MITOCHONDRIAL; FEMALE; GENETIC MARKERS; HUMANS; LOGISTIC MODELS; MALE; MIDDLE AGED; MULTIVARIATE ANALYSIS; NADH DEHYDROGENASE; PREDICTIVE VALUE OF TESTS; REAL-TIME POLYMERASE CHAIN REACTION; RISK FACTORS; ROC CURVE; UP-REGULATION; ANTILIPEMIC AGENT; C REACTIVE PROTEIN; CIRCULATIN…	CLIN LAB	CLIN. LAB.	ENGLISH	VERLAG KLINISCHES LABOR GMBH	2015		14336510	CLINICAL LABORATORY	37	CIRCULATING CELL FREE MITOCHONDRIAL DNA IS A BIOMARKER IN THE DEVELOPMENT OF CORONARY HEART DISEASE IN THE PATIENTS WITH TYPE 2 DIABETES	61	ISI	NANJING UNIVERSITY SCHOOL OF MEDICINE	NANJING UNIVERSITY SCHOOL OF MEDICINE		LIU J, 2015, CLIN LAB	LIU J, 2015, CLIN LAB
LIU J;ZOU Y;TANG Y;XI M;XIE L;ZHANG Q;GONG J	none	AIMS/INTRODUCTION: CIRCULATING CELL-FREE MITOCHONDRIAL DEOXYRIBONUCLEIC ACID (CCF-MTDNA) IS PRESUMABLY DERIVED FROM INJURED TISSUES OR CELLS IN THE BODY AND HAS BEEN SUGGESTED TO BE POTENTIAL BIOMARKER IN SEVERAL DISEASES. THE PRESENT STUDY EXPLORED WHETHER MTDNA COULD BE USED AS A BIOMARKER TO EVALUATE DISEASE IN CORONARY HEART DISEASE (CHD) PATIENTS WITH OR WITHOUT DIABETES MELLITUS (DM). MATER…	DEPARTMENT OF CARDIOLOGY, JINLING HOSPITAL, NANJING UNIVERSITY SCHOOL OF MEDICINE, NANJING, JIANGSU, CHINA	CIRCULATING CELL-FREE MITOCHONDRIAL DEOXYRIBONUCLEIC ACID; CORONARY HEART DISEASE; DIABETES MELLITUS	10.1111/jdi.12366	ARTICLE	AGED; BLOOD GLUCOSE; CORONARY ARTERY DISEASE; DIABETES MELLITUS; TYPE 2; DNA; MITOCHONDRIAL; FEMALE; HUMANS; MALE; MIDDLE AGED; BIOLOGICAL MARKER; CIRCULATING CELL FREE MITOCHONDRIAL DNA; GLUCOSE; MITOCHONDRIAL DNA; REDUCED NICOTINAMIDE ADENINE DINUCLEOTIDE DEHYDROGENASE; UNCLASSIFIED DRUG; GLUCOSE BLOOD LEVEL; MITOCHONDRIAL DNA; ADULT; AGED; ARTICLE; CARDIOVASCULAR RISK; CONTROLLED STUDY; DIAGNO…	J DIABETES INVEST	J. DIABETES INVEST.	ENGLISH	BLACKWELL PUBLISHING	2016	Q. ZHANG; DEPARTMENT OF CARDIOLOGY, JINLING HOSPITAL, NANJING UNIVERSITY SCHOOL OF MEDICINE, NANJING, JIANGSU, CHINA; EMAIL: QIGAO.Z@MEDMAIL.COM.CN	20401116	JOURNAL OF DIABETES INVESTIGATION	28	CIRCULATING CELLFREE MITOCHONDRIAL DEOXYRIBONUCLEIC ACID IS INCREASED IN CORONARY HEART DISEASE PATIENTS WITH DIABETES MELLITUS	7	ISI	NANJING UNIVERSITY SCHOOL OF MEDICINE	NOTREPORTED;NANJING UNIVERSITY SCHOOL OF MEDICINE;NOTREPORTED		LIU J, 2016, J DIABETES INVEST	LIU J, 2016, J DIABETES INVEST
LOTTA L;STEWART I;SHARP S;DAY F;BURGESS S;LUAN J;BOWKER N;CAI L;LI C;WITTEMANS L;KERRISON N;KHAW K;MCCARTHY M;O'RAHILLY S;SCOTT R;SAVAGE D;PERRY J;LANGENBERG C;WAREHAM N	none	IMPORTANCE: PHARMACOLOGICAL ENHANCERS OF LIPOPROTEIN LIPASE (LPL) ARE IN PRECLINICAL OR EARLY CLINICAL DEVELOPMENT FOR CARDIOVASCULAR PREVENTION. STUDYING WHETHER THESE AGENTS WILL REDUCE CARDIOVASCULAR EVENTS OR DIABETES RISK WHEN ADDED TO EXISTING LIPID-LOWERING DRUGS WOULD REQUIRE LARGE OUTCOME TRIALS. HUMAN GENETICS STUDIES CAN HELP PRIORITIZE OR DEPRIORITIZE THESE RESOURCE-DEMANDING ENDEAVOR…	MRC EPIDEMIOLOGY UNIT, INSTITUTE OF METABOLIC SCIENCE, UNIVERSITY OF CAMBRIDGE, BOX 285, CAMBRIDGE, CB2 0QQ, UNITED KINGDOM; MRC BIOSTATISTICS UNIT, UNIVERSITY OF CAMBRIDGE, CAMBRIDGE, UNITED KINGDOM; DEPARTMENT OF PUBLIC HEALTH AND PRIMARY CARE, UNIVERSITY OF CAMBRIDGE, CAMBRIDGE, UNITED KINGDOM; OXFORD CENTRE FOR DIABETES, ENDOCRINOLOGY, AND METABOLISM, UNIVERSITY OF OXFORD, OXFORD, UNITED KING…		10.1001/jamacardio.2018.2866	ARTICLE	AGED; ANGIOPOIETIN-LIKE 4 PROTEIN; CHOLESTEROL; LDL; CORONARY ARTERY DISEASE; DIABETES MELLITUS; TYPE 2; FEMALE; GENETIC ASSOCIATION STUDIES; GENETIC PREDISPOSITION TO DISEASE; HUMANS; HYDROXYMETHYLGLUTARYL COA REDUCTASES; LIPOLYSIS; LIPOPROTEIN LIPASE; MALE; MEMBRANE PROTEINS; MIDDLE AGED; ODDS RATIO; PROPROTEIN CONVERTASE 9; ANGIOPOIETIN RELATED PROTEIN 4; ANGPTL4 PROTEIN; HUMAN; HMGCR PROTEIN;…	JAMA CARDIOL	JAMA CARDIOL.	ENGLISH	AMERICAN MEDICAL ASSOCIATION	2018	N.J. WAREHAM; MRC EPIDEMIOLOGY UNIT, INSTITUTE OF METABOLIC SCIENCE, UNIVERSITY OF CAMBRIDGE, CAMBRIDGE, BOX 285, CB2 0QQ, UNITED KINGDOM; EMAIL: NICK.WAREHAM@MRC-EPID.CAM.AC.UK	23806583	JAMA CARDIOLOGY	52	ASSOCIATION OF GENETICALLY ENHANCED LIPOPROTEIN LIPASEMEDIATED LIPOLYSIS AND LOWDENSITY LIPOPROTEIN CHOLESTEROLLOWERING ALLELES WITH RISK OF CORONARY DISEASE AND TYPE 2 DIABETES	3	ISI	UNIVERSITY OF CAMBRIDGE;UNIVERSITY OF CAMBRIDGE;UNIVERSITY OF CAMBRIDGE;UNIVERSITY OF OXFORD;UNIVERSITY OF OXFORD;NIHR OXFORD BIOMEDICAL RESEARCH CENTRE;UNIVERSITY OF CAMBRIDGE	NOTREPORTED;UNIVERSITY OF CAMBRIDGE;NOTREPORTED		LOTTA LA, 2018, JAMA CARDIOL	LOTTA LA, 2018, JAMA CARDIOL
LOTTA L;WITTEMANS L;ZUBER V;STEWART I;SHARP S;LUAN J;DAY F;LI C;BOWKER N;CAI L;DE L R E;KHAW K;PERRY J;O'RAHILLY S;SCOTT R;SAVAGE D;BURGESS S;WAREHAM N;LANGENBERG C	none	IMPORTANCE: BODY FAT DISTRIBUTION, USUALLY MEASURED USING WAIST-TO-HIP RATIO (WHR), IS AN IMPORTANT CONTRIBUTOR TO CARDIOMETABOLIC DISEASE INDEPENDENT OF BODY MASS INDEX (BMI). WHETHER MECHANISMS THAT INCREASE WHR VIA LOWER GLUTEOFEMORAL (HIP) OR VIA HIGHER ABDOMINAL (WAIST) FAT DISTRIBUTION AFFECT CARDIOMETABOLIC RISK IS UNKNOWN. OBJECTIVE: TO IDENTIFY GENETIC VARIANTS ASSOCIATED WITH HIGHER WHR…	MRC EPIDEMIOLOGY UNIT, UNIVERSITY OF CAMBRIDGE, CAMBRIDGE, CB20QQ, UNITED KINGDOM; MRC BIOSTATISTICS UNIT, UNIVERSITY OF CAMBRIDGE, CAMBRIDGE, UNITED KINGDOM; DEPARTMENT OF PUBLIC HEALTH AND PRIMARY CARE, UNIVERSITY OF CAMBRIDGE, CAMBRIDGE, UNITED KINGDOM; METABOLIC RESEARCH LABORATORIES, INSTITUTE OF METABOLIC SCIENCE, UNIVERSITY OF CAMBRIDGE, CAMBRIDGE, UNITED KINGDOM		10.1001/jama.2018.19329	ARTICLE	ABDOMINAL FAT; ADIPOSITY; BODY MASS INDEX; CARDIOVASCULAR DISEASES; CORONARY DISEASE; DIABETES MELLITUS; TYPE 2; FEMALE; GENETIC PREDISPOSITION TO DISEASE; GENETIC VARIATION; GENOME-WIDE ASSOCIATION STUDY; HUMANS; MALE; MIDDLE AGED; RISK FACTORS; WAIST-HIP RATIO; GLUCOSE; INSULIN; LOW DENSITY LIPOPROTEIN CHOLESTEROL; TRIACYLGLYCEROL; ABDOMINAL FAT; ADIPOSE TISSUE; ADULT; ARTICLE; BODY BUILD; BODY…	JAMA	JAMA	ENGLISH	AMERICAN MEDICAL ASSOCIATION	2018	L.A. LOTTA; MRC EPIDEMIOLOGY UNIT, UNIVERSITY OF CAMBRIDGE, CAMBRIDGE, CB20QQ, UNITED KINGDOM; EMAIL: CLAUDIA.LANGENBERG@MRC-EPID.CAM.AC.UK	00987484	JAMA - JOURNAL OF THE AMERICAN MEDICAL ASSOCIATION	121	ASSOCIATION OF GENETIC VARIANTS RELATED TO GLUTEOFEMORAL VS ABDOMINAL FAT DISTRIBUTION WITH TYPE 2 DIABETES CORONARY DISEASE AND CARDIOVASCULAR RISK FACTORS	320	ISI	UNIVERSITY OF CAMBRIDGE;UNIVERSITY OF CAMBRIDGE;UNIVERSITY OF CAMBRIDGE;UNIVERSITY OF CAMBRIDGE	NOTREPORTED;UNIVERSITY OF CAMBRIDGE;NOTREPORTED		LOTTA LA, 2018, JAMA	LOTTA LA, 2018, JAMA
LU T;FORGETTA V;YU O;MOKRY L;GREGORY M;THANASSOULIS G;GREENWOOD C;RICHARDS J	ALTSHULER DM, 2015, NATURE, V526, P68, DOI 10.1038/NATURE15393;AMER DIABET ASSOC, 2010, DIABETES CARE, V33, PS62, DOI 10.2337/DC10-S062;ASZTALOS BF, 2006, ATHEROSCLEROSIS, V188, P59, DOI 10.1016/J.ATHEROSCLEROSIS.2005.10.018;BURGESS S, 2018, JAMA CARDIOL, V3, P619, DOI 10.1001/JAMACARDIO.2018.1470;BYCROFT C, 2018, NATURE, V562, P203, DOI 10.1038/S41586-018-0579-Z;CEFALU WT, 2019, DIABETES CARE, V…	BACKGROUND TYPE 2 DIABETES INCREASES THE RISK OF CORONARY HEART DISEASE (CHD), YET THE MECHANISMS INVOLVED REMAIN POORLY DESCRIBED. POLYGENIC RISK SCORES (PRS) PROVIDE AN OPPORTUNITY TO UNDERSTAND RISK FACTORS SINCE THEY REFLECT ETIOLOGIC PATHWAYS FROM THE ENTIRE GENOME. WE THEREFORE TESTED WHETHER A PRS FOR CHD INFLUENCED RISK OF CHD IN INDIVIDUALS WITH TYPE 2 DIABETES AND WHICH RISK FACTORS WER…	JEWISH GEN HOSP, LADY DAVIS INST MED RES, CTR CLIN EPIDEMIOL, MONTREAL, PQ, CANADA.; MCGILL UNIV, QUANTITAT LIFE SCI PROGRAM, MONTREAL, PQ, CANADA.; JEWISH GEN HOSP, DIV ENDOCRINOL, MONTREAL, PQ, CANADA.; MCGILL UNIV, DEPT MED, MONTREAL, PQ, CANADA.; MCGILL UNIV, CTR HLTH, PREVENT & GENOM CARDIOL, MONTREAL, PQ, CANADA.; MCGILL UNIV, RES INST, MONTREAL, PQ, CANADA.; MCGILL UNIV, DEPT HUMAN GENET, …	ATHEROSCLEROSIS; CORONARY HEART DISEASE; POLYGENIC RISK SCORES; RISK FACTORS; TYPE 2 DIABETES	10.1186/s12933-020-0988-9	ARTICLE	GENETIC RISK; ASSOCIATION; SCORE; INTERVENTION; EPIDEMIOLOGY; MORTALITY; HISTORY	CARDIOVASC DIABETOL	CARDIOVASC. DIABETOL.	ENGLISH	BMC	2020	RICHARDS, JB (CORRESPONDING AUTHOR), JEWISH GEN HOSP, ROOM H-413,3755 COTE ST CATHERINE RD, MONTREAL, PQ H3T 1E2, CANADA.		CARDIOVASCULAR DIABETOLOGY	19	POLYGENIC RISK FOR CORONARY HEART DISEASE ACTS THROUGH ATHEROSCLEROSIS IN TYPE 2 DIABETES	19	ISI	MCGILL UNIVERSITY; LADY DAVIS INSTITUTE; MCGILL UNIVERSITY; MCGILL UNIVERSITY; MCGILL UNIVERSITY; MCGILL UNIVERSITY; MCGILL UNIVERSITY; MCGILL UNIVERSITY; MCGILL UNIVERSITY; MCGILL UNIVERSITY; UNIVERSITY OF LONDON; KING'S COLLEGE LONDON; MCGILL UNIVERSITY	JEWISH GEN HOSP		LU TY, 2020, CARDIOVASC DIABETOL	LU TY, 2020, CARDIOVASC DIABETOL
LUO M;WANG G;XU C;ZENG M;LIN F;WU J;WAN Q	none	AIMS: TYPE 2 DIABETES MELLITUS (DM2) IS ASSOCIATED WITH CORONARY HEART DISEASE (CHD) AND IS CHARACTERIZED BY HIGH LEVELS OF PLASMINOGEN ACTIVATOR INHIBITOR (PAI)-1. CIRCULATING MICRORNAS HAVE BEEN REPORTED AS POTENTIAL DIAGNOSTIC BIOMARKERS FOR DM2 AND CHD. HOWEVER, THE UNDERLYING MECHANISMS HAVE LARGELY REMAINED UNCLEAR. MAIN METHODS: THE CHANGES OF CIRCULATING MIR-30C, PAI-1 AND VITRONETIN (VN)…	COLLABORATIVE INNOVATION CENTER FOR PREVENTION AND TREATMENT OF CARDIOVASCULAR DISEASE OF SICHUAN PROVINCE, DRUG DISCOVERY RESEACH CENTER, SOUTHWEST MEDICAL UNIVERSITY, LUZHOU, SICHUAN, CHINA; DEPARTMENT OF ENDOCRINOLOGY, NEPHROPATHY CLINICAL MEDICAL RESEARCH CENTER OF SICHUAN PROVINCE, AFFILIATED HOSPITAL OF SOUTHWEST MEDICAL UNIVERSITY, LUZHOU, SICHUAN, CHINA; LABORATORY FOR CARDIOVASCULAR PHAR…	CIRCULATING MICRORNA; CORONARY HEART DISEASE; PLASMINOGEN ACTIVATOR INHIBITOR-1; TYPE 2 DIABETES MELLITUS; VITRONECTIN	10.1016/j.lfs.2019.117092	ARTICLE	AGED; BIOMARKERS; CELL-FREE NUCLEIC ACIDS; CELLS; CULTURED; CORONARY DISEASE; DIABETES MELLITUS; TYPE 2; FEMALE; HUMANS; MALE; MICRORNAS; MIDDLE AGED; PLASMINOGEN ACTIVATOR INHIBITOR 1; VITRONECTIN; BIOLOGICAL MARKER; CIRCULATING MICRORNA; MICRORNA 30C; PLASMINOGEN ACTIVATOR INHIBITOR 1; UNCLASSIFIED DRUG; VITRONECTIN; BIOLOGICAL MARKER; CELL FREE NUCLEIC ACID; MICRORNA; MIRN30 MICRORNA; HUMAN; P…	LIFE SCI	LIFE SCI.	ENGLISH	ELSEVIER INC.	2019	Q. WAN; DEPARTMENT OF ENDOCRINOLOGY, NEPHROPATHY CLINICAL MEDICAL RESEARCH CENTER OF SICHUAN PROVINCE, AFFILIATED HOSPITAL OF SOUTHWEST MEDICAL UNIVERSITY, LUZHOU, 646000, CHINA; EMAIL: WANQIN3@126.COM	00243205	LIFE SCIENCES	20	CIRCULATING MIR30C AS A PREDICTIVE BIOMARKER OF TYPE 2 DIABETES MELLITUS WITH CORONARY HEART DISEASE BY REGULATING PAI1VN INTERACTIONS	239	ISI	SOUTHWEST MEDICAL UNIVERSITY;AFFILIATED HOSPITAL OF SOUTHWEST MEDICAL UNIVERSITY;SOUTHWEST MEDICAL UNIVERSITY;AFFILIATED HOSPITAL OF SOUTHWEST MEDICAL UNIVERSITY	NOTREPORTED;AFFILIATED HOSPITAL OF SOUTHWEST MEDICAL UNIVERSITY;NOTREPORTED		LUO M, 2019, LIFE SCI	LUO M, 2019, LIFE SCI
LYALL D;CELIS-MORALES C;WARD J;ILIODROMITI S;ANDERSON J;GILL J;SMITH D;NTUK U;MACKAY D;HOLMES M;SATTAR N;PELL J	ALLEN N, 2012, HEALTH POLICY TECHN, V1, P123, DOI 10.1016/J.HLPT.2012.07.003;ANONYMOUS, GEN QUAL CONTR UK BI;BAUM CF, IVREG2 STATA MODULE;BENITO-LEÓN J, 2013, EUR J NEUROL, V20, P899, DOI 10.1111/ENE.12083;BENITO-LEON J, 2013, EUR J NEUROL, V20, PE76;BHATNAGAR P, 2015, HEART, V101, P1182, DOI 10.1136/HEARTJNL-2015-307516;BHATNAGAR P, 2010, BMC PUBLIC HEALTH, V10, DOI 10.1186/1471-2458-10-539;BÖHM…	IMPORTANCE HIGHER BODY MASS INDEX (BMI) IS A RISK FACTOR FOR CARDIOMETABOLIC DISEASE; HOWEVER, THE UNDERLYING CAUSAL ASSOCIATIONS REMAIN UNCLEAR. OBJECTIVES TO USE UK BIOBANK DATA TO REPORT CAUSAL ESTIMATES OF THE ASSOCIATION BETWEEN BMI AND CARDIOMETABOLIC DISEASE OUTCOMES AND TRAITS, SUCH AS PULSE RATE, USING MENDELIAN RANDOMIZATION. DESIGN, SETTING, AND PARTICIPANTS CROSS-SECTIONAL BASELINE DA…	UNIV GLASGOW, INST HLTH & WELLBEING, 1 LILYBANK GARDENS, GLASGOW G12 8RZ, LANARK, SCOTLAND.; UNIV GLASGOW, INST CARDIOVASC & MED SCI, GLASGOW, LANARK, SCOTLAND.; UNIV OXFORD, CLIN TRIAL SERV UNIT, NUFFIELD DEPT POPULAT HLTH, OXFORD, ENGLAND.; UNIV OXFORD, EPIDEMIOL STUDIES UNIT, NUFFIELD DEPT POPULAT HLTH, OXFORD, ENGLAND.; UNIV OXFORD, MRC, POPULAT HLTH RES UNIT, OXFORD, ENGLAND.; OXFORD UNIV HO…		10.1001/jamacardio.2016.5804	ARTICLE	CORONARY-HEART-DISEASE; CARDIOVASCULAR-DISEASE; OBESITY; EPIDEMIOLOGY; HYPERTENSION; INSTRUMENTS; ADIPOSITY; TRAITS; STROKE; BIAS	JAMA CARDIOL	JAMA CARDIOL.	ENGLISH	AMER MEDICAL ASSOC	2017	LYALL, DM (CORRESPONDING AUTHOR), UNIV GLASGOW, INST HLTH & WELLBEING, 1 LILYBANK GARDENS, GLASGOW G12 8RZ, LANARK, SCOTLAND.	2380-6583	JAMA CARDIOLOGY	145	ASSOCIATION OF BODY MASS INDEX WITH CARDIOMETABOLIC DISEASE IN THE UK BIOBANK A MENDELIAN RANDOMIZATION STUDY	2	ISI	UNIVERSITY OF GLASGOW; UNIVERSITY OF GLASGOW; UNIVERSITY OF OXFORD; UNIVERSITY OF OXFORD; UNIVERSITY OF OXFORD; UNIVERSITY OF OXFORD	UNIV GLASGOW		LYALL DM, 2017, JAMA CARDIOL	LYALL DM, 2017, JAMA CARDIOL
MA R;LEE H;LAM V;TAM C;HO J;ZHAO H;GUAN J;KONG A;LAU E;ZHANG G;LUK A;WANG Y;TSUI S;CHAN T;HU C;JIA W;PARK K;LEE H;FURUTA H;NANJO K;TAI E;NG D;TANG N;WOO J;LEUNG P;XUE H;WONG J;LEUNG P;LAU T;TONG P;XU G;NG M;SO W;CHAN J	ANONYMOUS, 2010, PLOS GENET;BAX L, 2007, BMC MED RES METHODOL, V7, DOI 10.1186/1471-2288-7-40;CHAN JCN, 2011, CURR CARDIOVASC RISK, V5, P230, DOI 10.1007/S12170-011-0172-6;CHAN JCN, 2009, JAMA-J AM MED ASSOC, V301, P2129, DOI 10.1001/JAMA.2009.726;CHO YS, 2012, NAT GENET, V44, P67, DOI 10.1038/NG.1019;DAVIS RJ, 2001, MOL CELL BIOL, V21, P1484, DOI 10.1128/MCB.21.5.1484-1490.2001;DESPRÉS JP, 2006,…	IN ASIA, YOUNG-ONSET TYPE 2 DIABETES (YOD) IS CHARACTERIZED BY OBESITY AND INCREASED RISK FOR CARDIOVASCULAR DISEASE (CVD). IN A GENOME-WIDE ASSOCIATION STUDY (GWAS) OF 99 CHINESE OBESE SUBJECTS WITH FAMILIAL YOD DIAGNOSED BEFORE 40-YEAR-OLD AND 101 CONTROLS, THE T ALLELE OF RS1408888 IN INTRON 1 OF DACH1(DACHSHUND HOMOLOG 1) WAS ASSOCIATED WITH AN ODDS RATIO (OR) OF 2.49(95% CONFIDENCE INTERVALS…	CHINESE UNIV HONG KONG, PRINCE WALES HOSP, DEPT MED & THERAPEUT, SHATIN, HONG KONG, PEOPLES R CHINA.; CHINESE UNIV HONG KONG, HONG KONG INST DIABET & OBES, HONG KONG, HONG KONG, PEOPLES R CHINA.; CHINESE UNIV HONG KONG, LI KA SHING INST HLTH SCI, PRINCE WALES HOSP, SHATIN, HONG KONG, PEOPLES R CHINA.; CHINESE UNIV HONG KONG, SCH BIOMED SCI, PRINCE WALES HOSP, SHATIN, HONG KONG, PEOPLES R CHINA.; …		10.1371/journal.pone.0084770	ARTICLE	GENOME-WIDE ASSOCIATION; HONG-KONG CHINESE; METABOLIC SYNDROME; SUSCEPTIBILITY LOCUS; CONSERVED ROLE; TYPE-2; GROWTH; RISK; BETA; PATHOPHYSIOLOGY	PLOS ONE	PLOS ONE	ENGLISH	PUBLIC LIBRARY SCIENCE	2014	CHAN, JCN (CORRESPONDING AUTHOR), CHINESE UNIV HONG KONG, PRINCE WALES HOSP, DEPT MED & THERAPEUT, SHATIN, HONG KONG, PEOPLES R CHINA.	1932-6203	PLOS ONE	13	FAMILIAL YOUNGONSET DIABETES PREDIABETES AND CARDIOVASCULAR DISEASE ARE ASSOCIATED WITH GENETIC VARIANTS OF IDACH1I IN CHINESE	9	ISI	CHINESE UNIVERSITY OF HONG KONG; PRINCE OF WALES HOSPITAL; CHINESE UNIVERSITY OF HONG KONG; CHINESE UNIVERSITY OF HONG KONG; PRINCE OF WALES HOSPITAL; CHINESE UNIVERSITY OF HONG KONG; PRINCE OF WALES HOSPITAL; CHINESE UNIVERSITY OF HONG KONG; PRINCE OF WALES HOSPITAL; SHANGHAI JIAO TONG UNIVERSITY; SEOUL NATIONAL UNIVERSITY (SNU); SEOUL NATIONAL UNIVERSITY (SNU); WAKAYAMA MEDICAL UNIVERSITY; NATI…	CHINESE UNIV HONG KONG		MA RCW, 2014, PLOS ONE	MA RCW, 2014, PLOS ONE
MA Y;JIANG Q;KONG D	none	MATRIX METALLOPEPTIDASE 1 (MMP-1) HAS BEEN REPORTED TO BE INVOLVED IN THE COEXISTENCE OF TYPE 2 DIABETES MELLITUS (T2DM) AND CORONARY HEART DISEASE (CHD). WE SOUGHT TO EXAMINE THE ASSOCIATION BETWEEN THE MMP-1 GENE POLYMORPHISM AND COEXISTENCE OF T2DM AND CHD IN A HAN CHINESE POPULATION. WE EXTRACTED GENOMIC DNA FROM THE PERIPHERAL BLOOD OF 794 SUBJECTS, INCLUDING 378 PATIENTS WITH COEXISTING T2D…	DEPARTMENT OF BLOOD AND ENDOCRINOLOGY, PEOPLE’S HOSPITAL OF ZOUCHENG CITY, ZOUCHENG, SHANDONG, CHINA; DEPARTMENT OF GYNAECOLOGY AND OBSTETRICS, MATERNAL AND CHILD CARE SERVICE CENTRE OF QUFU CITY, QUFU, SHANGDONG, CHINA	CORONARY HEART DISEASE; MATRIX METALLOPEPTIDASE 1; POLYMORPHISM; TYPE 2 DIABETES MELLITUS	10.4238/gmr.15027938	ARTICLE	ADULT; AGED; ALLELES; ASIAN CONTINENTAL ANCESTRY GROUP; CORONARY DISEASE; DIABETES MELLITUS; TYPE 2; FEMALE; GENETIC ASSOCIATION STUDIES; GENETIC PREDISPOSITION TO DISEASE; GENOTYPE; HUMANS; MALE; MATRIX METALLOPROTEINASE 1; MIDDLE AGED; GENOMIC DNA; INTERSTITIAL COLLAGENASE; INTERSTITIAL COLLAGENASE; MMP1 PROTEIN; HUMAN; ARTICLE; BODY MASS; COMORBIDITY; CONTROLLED STUDY; DNA EXTRACTION; GENE FRE…	GENET MOL RES	GENET. MOL. RES.	ENGLISH	FUNDACAO DE PESQUISAS CIENTIFICAS DE RIBEIRAO PRETO	2016	Q.Y. JIANG; DEPARTMENT OF BLOOD AND ENDOCRINOLOGY, PEOPLE’S HOSPITAL OF ZOUCHENG CITY, ZOUCHENG, CHINA; EMAIL: WDTFMMU@126.COM	16765680	GENETICS AND MOLECULAR RESEARCH	4	ASSOCIATION BETWEEN MATRIX METALLOPEPTIDASE 1 AND TYPE 2 DIABETES MELLITUS COEXISTING WITH CORONARY HEART DISEASE IN A HAN CHINESE POPULATION	15	ISI	PEOPLE’S HOSPITAL OF ZOUCHENG CITY;MATERNAL AND CHILD CARE SERVICE CENTRE OF QUFU CITY	NOTREPORTED;PEOPLE’S HOSPITAL OF ZOUCHENG CITY;NOTREPORTED		MA YZ, 2016, GENET MOL RES	MA YZ, 2016, GENET MOL RES
MACKNESS B;MCELDUFF P;MACKNESS M	none	OBJECTIVE. TO INVESTIGATE THE PARAOXONASE-2 (PON2)-C/S310 POLYMORPHISM AND ITS RELATIONSHIP TO THE PRESENCE OF DIABETIC COMPLICATIONS AND GLYCAEMIC CONTROL. DESIGN. CASE-CONTROL STUDY. SETTING. ONE STUDY CENTRE AT UNIVERSITY HOSPITAL. MATERIALS AND METHODS. THE SUBJECTS WERE PEOPLE WITH TYPE 2 DIABETES (N = 252), TYPE 1 DIABETES (N = 152) AND HEALTHY CONTROLS (N = 282). THE PON2-C/S310 POLYMORPHI…	UNIVERSITY DEPARTMENT OF MEDICINE, MANCHESTER ROYAL INFIRMARY, MANCHESTER, UNITED KINGDOM; SCHOOL OF EPIDEMIOLOGY AND PUBLIC HEALTH, UNIVERSITY OF MANCHESTER, MANCHESTER, UNITED KINGDOM; UNIVERSITY DEPARTMENT OF MEDICINE, MANCHESTER ROYAL INFIRMARY, MANCHESTER M13 9WL, OXFORD ROAD, UNITED KINGDOM	CONTROL; CORONARY HEART DISEASE; OXIDATION; PARAOXONASE-2; TYPE 1 DIABETES; TYPE 2 DIABETES	10.1111/j.1365-2796.2005.01554.x	ARTICLE	ADULT; ARYLDIALKYLPHOSPHATASE; BLOOD GLUCOSE; CASE-CONTROL STUDIES; CHI-SQUARE DISTRIBUTION; DIABETES MELLITUS; TYPE 1; DIABETES MELLITUS; TYPE 2; DIABETIC ANGIOPATHIES; FEMALE; GENETIC PREDISPOSITION TO DISEASE; GENOTYPE; HOMOZYGOTE; HUMANS; LIPIDS; LIPOPROTEINS; LIPOPROTEINS; LDL; MALE; MIDDLE AGED; POLYMORPHISM; GENETIC; ARYLDIALKYLPHOSPHATASE; HEMOGLOBIN A1C; LIPID; LIPOPROTEIN; ADULT; ARTICL…	J INTERN MED (GBR)	J. INTERN. MED. (GBR)	ENGLISH		2005	M.I. MACKNESS; UNIVERSITY DEPARTMENT OF MEDICINE, MANCHESTER ROYAL INFIRMARY, MANCHESTER M13 9WL, OXFORD ROAD, UNITED KINGDOM; EMAIL: MIKE.MACKNESS@CMMC.NHS.UK	09546820	JOURNAL OF INTERNAL MEDICINE	31	THE PARAOXONASE2310 POLYMORPHISM IS ASSOCIATED WITH THE PRESENCE OF MICROVASCULAR COMPLICATIONS IN DIABETES MELLITUS	258	ISI	UNIVERSITY DEPARTMENT OF MEDICINE;UNIVERSITY OF MANCHESTER;UNIVERSITY DEPARTMENT OF MEDICINE	NOTREPORTED;UNIVERSITY DEPARTMENT OF MEDICINE;NOTREPORTED		MACKNESS B, 2005, J INTERN MED (GBR)	MACKNESS B, 2005, J INTERN MED (GBR)
MALEK S;AL-SERRI A;AL-BUSTAN S	none	LIPOPROTEIN LIPASE IS A KEY ENZYME IN LIPID METABOLISM WITH REPORTED VARIANTS ASSOCIATED WITH OBESITY, HYPERTENSION, TYPE 2 DIABETES, AND CORONARY HEART DISEASE. THIS STUDY WAS PERFORMED TO INVESTIGATE THE ASSOCIATION BETWEEN COMMON LIPOPROTEIN LIPASE SINGLE NUCLEOTIDE POLYMORPHISMS AND METABOLIC DISORDERS IN A SAMPLE OF KUWAITI COHORT (N = 494). FIVE LIPOPROTEIN LIPASE VARIANTS (RS1801177, RS295…	DEPARTMENT OF BIOLOGICAL SCIENCES, FACULTY OF SCIENCE; UNIT OF HUMAN GENETICS, DEPARTMENT OF PATHOLOGY, FACULTY OF MEDICINE, KUWAIT UNIVERSITY, KUWAIT CITY, KUWAIT	KUWAIT; METABOLIC DISORDERS; POLYMORPHISM	10.1097/XCE.0000000000000254	ARTICLE		CARDIOVASC ENDOCRINOL METAB	CARDIOVASC. ENDOCRINOL. METAB.	ENGLISH	LIPPINCOTT WILLIAMS AND WILKINS	2021	S.A. AL-BUSTAN; DEPARTMENT OF BIOLOGICAL SCIENCES, FACULTY OF SCIENCE, KUWAIT UNIVERSITY, SAFAT, PO BOX 5069, 13060, KUWAIT; EMAIL: S.ALBUSTAN@KU.EDU.KW	25740954	CARDIOVASCULAR ENDOCRINOLOGY AND METABOLISM	1	GENETIC ASSOCIATION OF LPL RS326 WITH BMI AMONG THE KUWAITI POPULATION	10	ISI	DEPARTMENT OF BIOLOGICAL SCIENCES;KUWAIT UNIVERSITY	NOTREPORTED;KUWAIT UNIVERSITY;NOTREPORTED		MALEK SH, 2021, CARDIOVASC ENDOCRINOL METAB	MALEK SH, 2021, CARDIOVASC ENDOCRINOL METAB
MALHOTRA A;WOLFORD J	AOUIZERAT BE, 1999, AM J HUM GENET, V65, P397, DOI 10.1086/302490;BEEKMAN M, 2003, EUR J HUM GENET, V11, P845, DOI 10.1038/SJ.EJHG.5201053;BEEKMAN M, 2002, TWIN RES, V5, P87, DOI 10.1375/1369052022956;BODZIOCH M, 1999, NAT GENET, V22, P347, DOI 10.1038/11914;BOSSÉ Y, 2004, J LIPID RES, V45, P2174, DOI 10.1194/JLR.R400008-JLR200;BOSSÉ Y, 2004, J LIPID RES, V45, P419, DOI 10.1194/JLR.M300401-JLR200…	CORONARY HEART DISEASE (CHD) IS THE LEADING CAUSE OF DEATH AMONG INDIVIDUALS WITH TYPE 2 DIABETES. DYSLIPIDEMIA CONTRIBUTES SIGNIFICANTLY TO CHD IN DIABETIC PATIENTS, IN WHOM LIPID ABNORMALITIES INCLUDE HYPERTRIGLYCERIDEMIA, LOW HDL CHOLESTEROL, AND INCREASED LEVELS OF SMALL, DENSE LDL PARTICLES. TO IDENTIFY GENES FOR LIPID-RELATED TRAITS, WE PERFORMED GENOME-WIDE LINKAGE ANALYSES FOR LEVELS OF T…	TRANSLAT GENOM RES INST, DIABET & OBES RES UNIT, PHOENIX, AZ 85004 USA.;		10.2337/diabetes.54.10.3007	ARTICLE	CORONARY-HEART-DISEASE; GENOME-WIDE SCAN; FAMILIAL COMBINED HYPERLIPIDEMIA; DENSITY-LIPOPROTEIN CHOLESTEROL; SUSCEPTIBILITY LOCUS; REVEALS EVIDENCE; LINKAGE ANALYSIS; INSULIN-RESISTANCE; LDL CHOLESTEROL; TANGIER-DISEASE	DIABETES	DIABETES	ENGLISH	AMER DIABETES ASSOC	2005	WOLFORD, JK (CORRESPONDING AUTHOR), TRANSLAT GENOM RES INST, DIABET & OBES RES UNIT, 445 N 5TH ST, PHOENIX, AZ 85004 USA.	0012-1797	DIABETES	38	ANALYSIS OF QUANTITATIVE LIPID TRAITS IN THE GENETICS OF NIDDM GENNID STUDY	54	ISI	TRANSLATIONAL GENOMICS RESEARCH INSTITUTE	TRANSLAT GENOM RES INST		MALHOTRA A, 2005, DIABETES	MALHOTRA A, 2005, DIABETES
MANRAJ M;FRANCKE S;HÉBÉ A;RAMJUTTUN U;FROGUEL P	ANDERSEN P, 1998, J CARDIOVASC PHARM, V31, P677, DOI 10.1097/00005344-199805000-00005;ANONYMOUS, FUTURE CHILD;BIRNBAUMER M, 1995, J RECEPT SIGNAL TR R, V15, P131, DOI 10.3109/10799899509045213;BONORA E, 2000, DIABETES CARE, V23, P57, DOI 10.2337/DIACARE.23.1.57;CANDELORE MR, 1996, ENDOCRINOLOGY, V137, P2638, DOI 10.1210/EN.137.6.2638;CLEMENT K, 1995, NEW ENGL J MED, V333, P352, DOI 10.1056/NEJM19…	AIMS/HYPOTHESIS. INSULIN RESISTANCE SYNDROME IS AN IMPORTANT RISK FACTOR FOR DEVELOPING PREMATURE CORONARY HEART DISEASE. IT IS A COMPLEX SYNDROME WHICH COULD ARISE FROM THE INTERACTION OF SEVERAL GENES MODULATED BY ENVIRONMENTAL FACTORS. THE TRP64ARG POLYMORPHISM IN THE BETA3-ADRENORECEPTOR GENE HAS BEEN FOUND TO BE ASSOCIATED WITH INSULIN RESISTANCE, OBESITY OR WITH EARLIER ONSET OF TYPE II (NO…	UNIV MAURITIUS, SSR CTR MED STUDIES & RES, MOKA, MAURITIUS.; INST PASTEUR, INST BIOL, CNRS 8090, F-59019 LILLE, FRANCE.;	INDO-MAURITIAN POPULATION; CHD; TYPE II DIABETES MELLITUS; INSULIN RESISTANCE; BETA 3-ADRENERGICRECEPTOR POLYMORPHISM; HDL CHOLESTEROL; TRIGLYCERIDE CONCENTRATION; BETA BLOCKER	10.1007/s001250051588	ARTICLE	BETA(3)-ADRENERGIC RECEPTOR GENE; CARDIOVASCULAR RISK; ADIPOSE-TISSUE; SOUTH ASIANS; OBESITY; LIPOLYSIS; VARIANT; WEIGHT	DIABETOLOGIA	DIABETOLOGIA	ENGLISH	SPRINGER-VERLAG	2001	MANRAJ, M (CORRESPONDING AUTHOR), UNIV MAURITIUS, SSR CTR MED STUDIES & RES, MOKA, MAURITIUS.	0012-186X	DIABETOLOGIA	13	GENETIC AND ENVIRONMENTAL NATURE OF THE INSULIN RESISTANCE SYNDROME IN INDOMAURITIAN SUBJECTS WITH PREMATURE CORONARY HEART DISEASE CONTRIBUTION OR II3ADRENORECEPTOR GENE POLYMORPHISM AND BETA BLOCKERS ON TRIGLYCERIDE AND HDL CONCENTRATIONS	44	ISI	UNIVERSITY OF MAURITIUS; CENTRE NATIONAL DE LA RECHERCHE SCIENTIFIQUE (CNRS); LE RESEAU INTERNATIONAL DES INSTITUTS PASTEUR (RIIP); UNIVERSITE DE LILLE - ISITE; INSTITUT PASTEUR LILLE	UNIV MAURITIUS		MANRAJ M, 2001, DIABETOLOGIA	MANRAJ M, 2001, DIABETOLOGIA
MARQUEZINE G;PEREIRA A;SOUSA A;MILL J;HUEB W;KRIEGER J	none	BACKGROUND: GENETIC POLYMORPHISMS OF THE TCF7L2 GENE ARE STRONGLY ASSOCIATED WITH LARGE INCREMENTS IN TYPE 2 DIABETES RISK IN DIFFERENT POPULATIONS WORLDWIDE. IN THIS STUDY, WE AIMED TO CONFIRM THE EFFECT OF THE TCF7L2 POLYMORPHISM RS7903146 ON DIABETES RISK IN A BRAZILIAN POPULATION AND TO ASSESS THE USE OF THIS GENETIC MARKER IN IMPROVING DIABETES RISK PREDICTION IN THE GENERAL POPULATION. METH…	HEART INSTITUTE, UNIVERSITY OF SÃO PAULO MEDICAL SCHOOL, SAO PAULO, BRAZIL; FEDERAL UNIVERSITY OF RIO GRANDE DO NORTE, NATAL, BRAZIL; FEDERAL UNIVERSITY OF ESPIRITO SANTO, VITÓRIA, BRAZIL		10.1186/1471-2350-9-106	ARTICLE	AGED; BRAZIL; COHORT STUDIES; CORONARY ARTERY DISEASE; CROSS-SECTIONAL STUDIES; DIABETES MELLITUS; TYPE 2; FEMALE; GENETIC PREDISPOSITION TO DISEASE; GENOME-WIDE ASSOCIATION STUDY; GENOTYPE; HUMANS; LOGISTIC MODELS; MALE; MIDDLE AGED; POLYMORPHISM; SINGLE NUCLEOTIDE; RISK ASSESSMENT; ROC CURVE; TCF TRANSCRIPTION FACTORS; TRANSCRIPTION FACTOR 7 LIKE 2; T CELL FACTOR 4; T CELL FACTOR PROTEIN; ADULT…	BMC MED GENET	BMC MED. GENET.	ENGLISH		2008	A.C. PEREIRA; HEART INSTITUTE, UNIVERSITY OF SÃO PAULO MEDICAL SCHOOL, SAO PAULO, BRAZIL; EMAIL: ALEXANDRE.PEREIRA@INCOR.USP.BR	14712350	BMC MEDICAL GENETICS	31	TCF7L2 VARIANT GENOTYPES AND TYPE 2 DIABETES RISK IN BRAZIL SIGNIFICANT ASSOCIATION BUT NOT A SIGNIFICANT TOOL FOR RISK STRATIFICATION IN THE GENERAL POPULATION	9	ISI	UNIVERSITY OF SÃO PAULO MEDICAL SCHOOL;FEDERAL UNIVERSITY OF RIO GRANDE DO NORTE;FEDERAL UNIVERSITY OF ESPIRITO SANTO	NOTREPORTED;UNIVERSITY OF SÃO PAULO MEDICAL SCHOOL;NOTREPORTED		MARQUEZINE GF, 2008, BMC MED GENET	MARQUEZINE GF, 2008, BMC MED GENET
MARTÍNEZ-CALLEJA A;QUIRÓZ-VARGAS I;PARRA-ROJAS I;MUÑOZ-VALLE J;LEYVA-VÁZQUEZ M;FERNÁNDEZ-TILAPA G;VENCES-VELÁZQUEZ A;CRUZ M;SALAZAR-MARTÍNEZ E;FLORES-ALFARO E	none	OBJECTIVE. WE EVALUATED THE ASSOCIATION BETWEEN FOUR POLYMORPHISMS IN THE CRP GENE WITH CIRCULATING LEVELS OF C-REACTIVE PROTEIN (CRP), TYPE 2 DIABETES (T2D), OBESITY, AND RISK SCORE OF CORONARY HEART DISEASE. METHODS. WE STUDIED 402 INDIVIDUALS AND CLASSIFIED THEM INTO FOUR GROUPS: HEALTHY, OBESE, T2D OBESE, AND T2D WITHOUT OBESITY, FROM GUERRERO, SOUTHWESTERN MEXICO. BLOOD LEVELS OF CRP, GLUCOS…	LABORATORIO DE ENFERMEDADES CRÓNICO DEGENERATIVAS, UNIDAD ACADÉMICA DE CIENCIAS QUÍMICO BIOLÓGICAS, UNIVERSIDAD AUTÓNOMA DE GUERRERO, 39070 CHILPANCINGO, GRO, MEXICO; DEPARTAMENTO DE BIOLOGÍA MOLECULAR Y GENÓMICA, CENTRO UNIVERSITARIO DE CIENCIAS DE LA SALUD, UNIVERSIDAD DE GUADALAJARA, 44350 GUADALAJARA, JAL, MEXICO; UNIDAD DE INVESTIGACIÓN MEDICA EN BIOQUÍMICA, HOSPITAL DE ESPECIALIDADES, INSTI…		10.1155/2012/982683	ARTICLE	C REACTIVE PROTEIN; CHOLESTEROL; GLUCOSE; TRIACYLGLYCEROL; ADULT; AGED; ARTICLE; BODY MASS; CARDIOVASCULAR RISK; CHOLESTEROL BLOOD LEVEL; CONTROLLED STUDY; DIASTOLIC BLOOD PRESSURE; FEMALE; GENETIC ASSOCIATION; GENETIC PREDISPOSITION; GENOTYPE; GLUCOSE BLOOD LEVEL; HAPLOTYPE; HUMAN; HUMAN CELL; HUMAN TISSUE; ISCHEMIC HEART DISEASE; LEUKOCYTE COUNT; MAJOR CLINICAL STUDY; MALE; MEXICO; NON INSULIN …	EXP DIA RES	EXP. DIA. RES.	ENGLISH	NORIA CORPORATION	2012	E. FLORES-ALFARO; LABORATORIO DE ENFERMEDADES CRÓNICO DEGENERATIVAS, UNIDAD ACADÉMICA DE CIENCIAS QUÍMICO BIOLÓGICAS, UNIVERSIDAD AUTÓNOMA DE GUERRERO, 39070 CHILPANCINGO, GRO, MEXICO; EMAIL: EFLORESA@ESPM.INSP.MX	16875214	EXPERIMENTAL DIABETES RESEARCH	20	HAPLOTYPES IN THE CRP GENE ASSOCIATED WITH INCREASED BMI AND LEVELS OF CRP IN SUBJECTS WITH TYPE 2 DIABETES OR OBESITY FROM SOUTHWESTERN MEXICO	2012	ISI	UNIVERSIDAD AUTÓNOMA DE GUERRERO;CENTRO UNIVERSITARIO DE CIENCIAS DE LA SALUD;INSTITUTO MEXICANO DEL SEGURO SOCIAL;INSTITUTO NACIONAL DE SALUD PÚBLICA;INSTITUTO MEXICANO DEL SEGURO SOCIAL	E. FLORES-ALFARO;UNIVERSIDAD AUTÓNOMA DE GUERRERO;EMAIL: EFLORESA@ESPM.INSP.MX		MARTÍNEZ-CALLEJA A, 2012, EXP DIA RES	MARTÍNEZ-CALLEJA A, 2012, EXP DIA RES
MARTÍNEZ-QUINTANA E;RODRÍGUEZ-GONZÁLEZ F;MEDINA-GIL J;GARAY-SÁNCHEZ P;TUGORES A	none	INTRODUCTION CYP2C19 IS A MAJOR ISOFORM OF CYTOCHROME P450 THAT METABOLIZES A NUMBER OF DRUGS AND IS INVOLVED IN THE GLUCOCORTICOIDS SYNTHESIS. CYP2C19 POLYMORPHISMS HAVE BEEN ASSOCIATED WITH THE GENETIC RISK FOR TYPE 2 DIABETES. METHODS FIVE HUNDRED AND THREE PATIENTS WITH AN ACUTE CORONARY EVENT WERE STUDIED TO ASSESS THE ASSOCIATION BETWEEN THE CYP2C19 ACTIVITY (CYP2C19*2, CYP2C19*3 AND CYP2C1…	SERVICIO DE CARDIOLOGÍA, HOSPITAL UNIVERSITARIO INSULAR-MATERNO INFANTIL, DEPARTAMENTO DE CIENCIAS MÉDICAS Y QUIRÚRGICAS, FACULTAD DE CIENCIAS DE LA SALUD, UNIVERSIDAD DE LAS PALMAS DE GRAN CANARIA, LAS PALMAS DE GRAN CANARIA, SPAIN; SERVICIO DE OFTALMOLOGÍA, HOSPITAL UNIVERSITARIO DE GRAN CANARIA DR. NEGRÍN, LAS PALMAS DE GRAN CANARIA, SPAIN; UNIDAD DE INVESTIGACIÓN, HOSPITAL UNIVERSITARIO INSUL…	ACUTE CORONARY SYNDROME; ARTERIAL HYPERTENSION; CYP2C19; DIABETES MELLITUS; INSULIN	10.1016/j.medcli.2017.02.035	ARTICLE	ACUTE CORONARY SYNDROME; ADOLESCENT; ADULT; AGED; AGED; 80 AND OVER; CYTOCHROME P-450 CYP2C19; DIABETES MELLITUS; TYPE 2; FEMALE; GENETIC MARKERS; GENETIC PREDISPOSITION TO DISEASE; GENOTYPE; HUMANS; HYPOGLYCEMIC AGENTS; INSULIN; MALE; MIDDLE AGED; POLYMORPHISM; GENETIC; RISK FACTORS; YOUNG ADULT; CYTOCHROME P450 2C19; INSULIN; ANTIDIABETIC AGENT; CYP2C19 PROTEIN; HUMAN; CYTOCHROME P450 2C19; ACU…	MED CLIN	MED. CLIN.	ENGLISH	EDICIONES DOYMA, S.L.	2017	E. MARTÍNEZ-QUINTANA; SERVICIO DE CARDIOLOGÍA, LAS PALMAS DE GRAN CANARIA, HOSPITAL UNIVERSITARIO INSULAR-MATERNO INFANTIL, DEPARTAMENTO DE CIENCIAS MÉDICAS Y QUIRÚRGICAS, FACULTAD DE CIENCIAS DE LA SALUD, UNIVERSIDAD DE LAS PALMAS DE GRAN CANARIA, SPAIN; EMAIL: EFRENCARDIO@GMAIL.COM	00257753	MEDICINA CLINICA	3	CYP2C19 ACTIVITY AND CARDIOVASCULAR RISK FACTORS IN PATIENTS WITH AN ACUTE CORONARY SYNDROME ACTIVIDAD DE CYP2C19 Y FACTORES DE RIESGO CARDIOVASCULAR EN PACIENTES CON SÍNDROME CORONARIO AGUDO	149	ISI	HOSPITAL UNIVERSITARIO INSULAR-MATERNO INFANTIL;HOSPITAL UNIVERSITARIO DE GRAN CANARIA DR. NEGRÍN;HOSPITAL UNIVERSITARIO INSULAR-MATERNO INFANTIL	NOTREPORTED;HOSPITAL UNIVERSITARIO INSULAR-MATERNO INFANTIL;NOTREPORTED		MARTÍNEZ-QUINTANA E, 2017, MED CLIN	MARTÍNEZ-QUINTANA E, 2017, MED CLIN
MARUSHCHAK M;MAZUR L;KRYNYTSKA I	none	OBJECTIVE. THE HALLMARKS OF TYPE 2 DIABETES MELLITUS (T2DM) ARE INSULIN RESISTANCE (IR) AND INSULIN RECEPTOR SUBSTRATE (IRS) PROTEINS ESSENTIAL FOR THE INSULIN SIGNALING. IRS-1 GENE HAS NOT ONLY BEEN SHOWN TO BE ASSOCIATED WITH T2DM, BUT ALSO HAS INDICATED THAT IT MAY SIGNIFICANTLY CORRELATE WITH DIABETIC COMPLICATIONS, SUCH AS CORONARY HEART DISEASE AND OBESITY. THE AIM OF THIS STUDY WAS TO EVAL…	DEPARTMENT OF FUNCTIONAL AND LABORATORY DIAGNOSTICS, I. HORBACHEVSKY TERNOPIL NATIONAL MEDICAL UNIVERSITY, TERNOPIL, UKRAINE; DEPARTMENT OF HIGHER NURSING EDUCATION, PATIENT CARE AND CLINICAL IMMUNOLOGY, I. HORBACHEVSKY TERNOPIL NATIONAL MEDICAL UNIVERSITY, TERNOPIL, UKRAINE	HYPERTENSION; IRS-1 POLYMORPHISM; LIPID PANEL; OBESITY; TYPE 2 DIABETES MELLITUS	10.2478/enr-2023-0001	ARTICLE	DIABETES MELLITUS; TYPE 2; ESSENTIAL HYPERTENSION; HUMANS; INSULIN RECEPTOR SUBSTRATE PROTEINS; INSULIN RESISTANCE; LIPIDS; OBESITY; POLYMORPHISM; GENETIC; HEMOGLOBIN A1C; INSULIN RECEPTOR SUBSTRATE 1; LIPID; INSULIN RECEPTOR SUBSTRATE; LIPID; ARTICLE; BLOOD SAMPLING; BODY MASS; CHOLESTEROL BLOOD LEVEL; CLINICAL ARTICLE; CLINICAL FEATURE; COMORBIDITY; CONTROLLED STUDY; DIABETIC PATIENT; DNA EXTRA…	ENDOCR REGUL	ENDOCR. REGUL.	ENGLISH	SCIENDO	2023	M. MARUSHCHAK; DEPARTMENT OF FUNCTIONAL AND LABORATORY DIAGNOSTICS, I. HORBACHEVSKY TERNOPIL NATIONAL MEDICAL UNIVERSITY, TERNOPIL, UKRAINE; EMAIL: MARUSHCHAK@TDMU.EDU.UA	12100668	ENDOCRINE REGULATIONS	2	INSULIN RECEPTOR SUBSTRATE1 GENE POLYMORPHISM AND LIPID PANEL DATA IN TYPE 2 DIABETIC PATIENTS WITH COMORBID OBESITY ANDOR ESSENTIAL HYPERTENSION	57	ISI	I. HORBACHEVSKY TERNOPIL NATIONAL MEDICAL UNIVERSITY;I. HORBACHEVSKY TERNOPIL NATIONAL MEDICAL UNIVERSITY	NOTREPORTED;I. HORBACHEVSKY TERNOPIL NATIONAL MEDICAL UNIVERSITY;NOTREPORTED		MARUSHCHAK M, 2023, ENDOCR REGUL	MARUSHCHAK M, 2023, ENDOCR REGUL
MÄRZ W;BOEHM B;WINKELMANN B;HOFFMANN M	none	AIMS/HYPOTHESIS. THE PLA1/A2 POLYMORPHISM OF PLATELET GLYCOPROTEIN IIIA (GPIIIA) HAS BEEN IMPLICATED IN THE PATHOGENESIS OF TYPE 2 DIABETES. WE STUDIED THIS POLYMORPHISM IN A HOMOGENOUS, EXTENSIVELY PHENOTYPED COHORT USING THE CANDIDATE GENE APPROACH. METHODS. THE PLA1/A2 POLYMORPHISM WAS DETERMINED IN 1051 PATIENTS WITH TYPE 2 DIABETES AND IN 2247 INDIVIDUALS WITHOUT TYPE 2 DIABETES. RESULTS. IN…	CLIN. INST. MED. CHEM. LAB. D., MEDICAL UNIVERSITY OF GRAZ, GRAZ, AUSTRIA; DIV. OF ENDOCRINOLOGY AND DIABETES, DEPARTMENT OF INTERNAL MEDICINE, UNIVERSITY OF ULM, ULM, GERMANY; COOP. U. PHARMACOGENOMICS/APPL. G., UNIVERSITY OF HEIDELBERG, HEIDELBERG, GERMANY; CARDIOLOGY, FRANKFURT, GERMANY; DIVISION OF CLINICAL CHEMISTRY, DEPARTMENT OF MEDICINE, UNIVERSITY HOSPITAL, FREIBURG, GERMANY; CLIN. INST.…	CORONARY HEART DISEASE; GENETICS; GLUCOSE; HUMAN PLATELET GLYCOPROTEIN IIIA POLYMORPHISM; MYOCARDIAL INFARCTION; TYPE 2 DIABETES MELLITUS	10.1007/s00125-004-1557-6	ARTICLE	AGED; BLOOD PRESSURE; DIABETES MELLITUS; TYPE 2; FEMALE; HUMANS; INTEGRIN BETA3; MALE; MIDDLE AGED; POLYMORPHISM; GENETIC; REFERENCE VALUES; RISK FACTORS; SMOKING; C PEPTIDE; GLUCOSE; GLYCOSYLATED HEMOGLOBIN; HEMOGLOBIN; INSULIN; PROINSULIN; VERY LATE ACTIVATION ANTIGEN 2; ACUTE HEART INFARCTION; ADULT; AGED; ARTICLE; CARDIOVASCULAR RISK; COMPARATIVE STUDY; CONTROLLED STUDY; DIABETOGENESIS; DIET …	DIABETOLOGIA	DIABETOLOGIA	ENGLISH		2004	W. MÄRZ; CLIN. INST. MED. CHEM. LAB. D., MEDICAL UNIVERSITY OF GRAZ, 8036 GRAZ, AUENBRUGGERPLATZ 15, AUSTRIA; EMAIL: WINFRIED.MAERZ@KLINIKUM-GRAZ.AT	0012186X	DIABETOLOGIA	8	THE PLA1A2 POLYMORPHISM OF PLATELET GLYCOPROTEIN IIIA IS NOT ASSOCIATED WITH THE RISK OF TYPE 2 DIABETES THE LUDWIGSHAFEN RISK AND CARDIOVASCULAR HEALTH STUDY	47	ISI	MEDICAL UNIVERSITY OF GRAZ;UNIVERSITY OF ULM;UNIVERSITY OF HEIDELBERG;UNIVERSITY HOSPITAL;MEDICAL UNIVERSITY OF GRAZ	NOTREPORTED;MEDICAL UNIVERSITY OF GRAZ;NOTREPORTED		MÄRZ W, 2004, DIABETOLOGIA	MÄRZ W, 2004, DIABETOLOGIA
MÄRZ W;NAUCK M;HOFFMANN M;NAGEL D;BOEHM B;KOENIG W;ROTHENBACHER D;WINKELMANN B	none	BACKGROUND-TYPE 2 DIABETES MELLITUS (T2DM) INCREASES THE RISK OF CORONARY ARTERY DISEASE (CAD). A G(-30)A POLYMORPHISM IN THE Β-CELL-SPECIFIC PROMOTER OF GLUCOKINASE (GK-30PM) HAS BEEN IMPLICATED IN REDUCED PANCREATIC Β-CELL FUNCTION. ITS IMPACT ON CAD HAS NOT BEEN EXAMINED. METHODS AND RESULTS-THE GLUCOKINASE G(-30)A VARIANT WAS DETERMINED IN 2567 PATIENTS WITH ANGIOGRAPHIC CAD AND IN 731 INDIVI…	CLIN. INST. MED./CHEM. LAB. DIAGN., MEDICAL UNIVERSITY OF GRAZ, GRAZ, AUSTRIA; DIVISION OF CLINICAL CHEMISTRY, DEPARTMENT OF MEDICINE, UNIVERSITY HOSPITAL, FREIBURG, GERMANY; INSTITUTE OF CLINICAL CHEMISTRY, GENERAL HOSPITAL, LUDWIGSHAFEN, GERMANY; DIV. OF ENDOCRINOLOGY AND DIABETES, DEPARTMENT OF MEDICINE, UNIVERSITY OF ULM, ULM, GERMANY; DEPARTMENT OF INTERNAL MEDICINE II, CARDIOLOGY, UNIVERSIT…	CORONARY DISEASE; DIABETES MELLITUS; GENETICS; GLUCOSE; MYOCARDIAL INFARCTION	10.1161/01.CIR.0000129306.44085.C4	ARTICLE	AGED; ALLELES; CORONARY ANGIOGRAPHY; CORONARY DISEASE; DIABETES MELLITUS; TYPE 2; FEMALE; GENETIC PREDISPOSITION TO DISEASE; GENOTYPE; GLUCOKINASE; GLUCOSE TOLERANCE TEST; HUMANS; MALE; MIDDLE AGED; ORGAN SPECIFICITY; PREVALENCE; PROMOTER REGIONS (GENETICS); RISK FACTORS; ADENINE; C PEPTIDE; GLUCOKINASE; GLUCOSE; GLYCOSYLATED HEMOGLOBIN; GUANINE; PROINSULIN; ADULT; AGED; ALLELE; AMINO ACID SUBSTI…	CIRCULATION	CIRCULATION	ENGLISH		2004	W. MÄRZ; CLIN. INST. MED./CHEM. LAB. DIAGN., MEDICAL UNIVERSITY OF GRAZ, 8036 GRAZ, AUENBRUGGERPLATZ 15, AUSTRIA; EMAIL: WINFRIED.MAERZ@KLINIKUM-GRAZ.AT	00097322	CIRCULATION	44	G30A POLYMORPHISM IN THE PANCREATIC PROMOTER OF THE GLUCOKINASE GENE ASSOCIATED WITH ANGIOGRAPHIC CORONARY ARTERY DISEASE AND TYPE 2 DIABETES MELLITUS	109	ISI	MEDICAL UNIVERSITY OF GRAZ;UNIVERSITY HOSPITAL;INSTITUTE OF CLINICAL CHEMISTRY;UNIVERSITY OF ULM;UNIVERSITY OF ULM;UNIVERSITY OF HEIDELBERG;UNIVERSITY OF HEIDELBERG;MEDICAL UNIVERSITY OF GRAZ	NOTREPORTED;MEDICAL UNIVERSITY OF GRAZ;NOTREPORTED		MÄRZ W, 2004, CIRCULATION	MÄRZ W, 2004, CIRCULATION
MATLOCH Z;KRATOCHVÍLOVÁ H;CINKAJZLOVÁ A;LIPŠ M;KOPECKÝ P;POŘÍZKA M;HALUZÍKOVÁ D;LINDNER J;MRÁZ M;KLOUČKOVÁ J;LACINOVÁ Z;HALUZÍK M	none	OMENTIN IS A PROTEIN PRODUCED BY NUMEROUS TISSUES INCLUDING ADIPOSE TISSUE. ITS CONCENTRATIONS ARE DECREASED IN PATIENTS WITH OBESITY, TYPE 2 DIABETES MELLITUS (DM) AND CORONARY ARTERY DISEASE (CAD). EXPERIMENTAL STUDIES SUGGEST THAT OMENTIN MAY HAVE ANTI-INFLAMMATORY AND INSULIN-SENSITIZING PROPERTIES. IN THE PRESENT STUDY, WE MEASURED CIRCULATING OMENTIN LEVELS AND ITS MRNA EXPRESSION IN EPICAR…	DR. PIREK'S CLINIC, MLADA BOLESLAV, CZECH REPUBLIC; CENTER FOR EXPERIMENTAL MEDICINE, INSTITUTE FOR CLINICAL AND EXPERIMENTAL MEDICINE, PRAGUE, CZECH REPUBLIC; INSTITUTE OF MEDICAL BIOCHEMISTRY AND LABORATORY DIAGNOSTICS, FIRST FACULTY OF MEDICINE, CHARLES UNIVERSITY AND GENERAL UNIVERSITY HOSPITAL, PRAGUE, CZECH REPUBLIC; DEPARTMENT OF ANESTHESIOLOGY, RESUSCITATION AND INTENSIVE CARE, FIRST FACU…	CARDIAC SURGERY; CORONARY ARTERY DISEASE; EPICARDIAL FAT; OMENTIN; TYPE 2 DIABETES MELLITUS	10.33549/physiolres.933909	ARTICLE	ADIPOSE TISSUE; ADULT; AGED; BIOMARKERS; CORONARY ARTERY DISEASE; CYTOKINES; DIABETES MELLITUS; TYPE 2; ELECTIVE SURGICAL PROCEDURES; FEMALE; GENE EXPRESSION; GPI-LINKED PROTEINS; HUMANS; LECTINS; MALE; MIDDLE AGED; PERICARDIUM; RNA; MESSENGER; BIOLOGICAL MARKER; CYTOKINE; GLYCOSYLPHOSPHATIDYLINOSITOL ANCHORED PROTEIN; ITLN1 PROTEIN; HUMAN; LECTIN; MESSENGER RNA; ADIPOSE TISSUE; ADULT; AGED; BLOO…	PHYSIOL RES	PHYSIOL. RES.	ENGLISH	CZECH ACADEMY OF SCIENCES	2018	D. HALUZÍKOVÁ; CENTER FOR EXPERIMENTAL MEDICINE, INSTITUTE FOR CLINICAL AND EXPERIMENTAL MEDICINE, PRAGUE 4, VÍDENSKÁ 1958/9, 140 21, CZECH REPUBLIC; EMAIL: HALM@IKEM.CZ	08628408	PHYSIOLOGICAL RESEARCH	13	CHANGES IN OMENTIN LEVELS AND ITS MRNA EXPRESSION IN EPICARDIAL ADIPOSE TISSUE IN PATIENTS UNDERGOING ELECTIVE CARDIAC SURGERY THE INFLUENCE OF TYPE 2 DIABETES AND CORONARY HEART DISEASE	67	ISI	DR. PIREK'S CLINIC;INSTITUTE FOR CLINICAL AND EXPERIMENTAL MEDICINE;CHARLES UNIVERSITY AND GENERAL UNIVERSITY HOSPITAL;CHARLES UNIVERSITY AND GENERAL UNIVERSITY HOSPITAL;CHARLES UNIVERSITY AND GENERAL UNIVERSITY HOSPITAL;CHARLES UNIVERSITY AND GENERAL UNIVERSITY HOSPITAL;INSTITUTE FOR CLINICAL AND EXPERIMENTAL MEDICINE	NOTREPORTED;INSTITUTE FOR CLINICAL AND EXPERIMENTAL MEDICINE;NOTREPORTED		MATLOCH Z, 2018, PHYSIOL RES	MATLOCH Z, 2018, PHYSIOL RES
MEDINA-GIL J;PÉREZ-GARCÍA A;SAAVEDRA-SANTANA P;DÍAZ-CARRASCO A;MARTÍNEZ-QUINTANA E;RODRÍGUEZ-GONZÁLEZ F;RAMÍREZ C;RIAÑO M;GARAY-SÁNCHEZ P;TUGORES A	none	MONOCYTES PARTICIPATE IN THE DEVELOPMENT OF ATHEROSCLEROSIS THROUGH THE ACTION OF CYTOKINES AND OTHER INFLAMMATORY MEDIATORS. AMONG THEM, CCR2 AND ITS LIGANDS, CCL2 AND CCL7 PLAY AN IMPORTANT ROLE, SO THE MAIN OBJECTIVE OF THIS WORK WAS TO DETERMINE WHETHER GENETIC VARIANTS AFFECTING THEIR ACTIVITY WERE ASSOCIATED WITH CARDIOVASCULAR DISEASE. A COHORT OF 519 PATIENTS THAT HAVE SUFFERED CORONARY E…	SERVICIO DE CARDIOLOGÍA, COMPLEJO HOSPITALARIO UNIVERSITARIO INSULAR MATERNO-INFANTIL, LAS PALMAS DE GRAN CANARIA, SPAIN; IMDEA RESEARCH INSTITUTE OF FOOD AND HEALTH SCIENCES, MADRID, SPAIN; DEPARTAMENTO DE MATEMÁTICAS, UNIVERSIDAD DE LAS PALMAS DE GRAN CANARIA, LAS PALMAS DE GRAN CANARIA, SPAIN; SECUGEN SL, MADRID, SPAIN; SERVICIO DE OFTALMOLOGÍA, HOSPITAL UNIVERSITARIO GRAN CANARIA DOCTOR NEGRÍ…	CARDIOVASCULAR DISEASE; CCL7; CHEMOKINE; GENETICS; MICRORNA (MIRNA)	10.3389/fcvm.2022.908070	ARTICLE	C REACTIVE PROTEIN; CHEMOKINE; CHEMOKINE RECEPTOR CCR2; MICRORNA; MIR 23A 3P; MONOCYTE CHEMOTACTIC PROTEIN 1; MONOCYTE CHEMOTACTIC PROTEIN 3; UNCLASSIFIED DRUG; 3' UNTRANSLATED REGION; ADULT; ANGINA PECTORIS; ARTICLE; ATHEROSCLEROSIS; BIOINFORMATICS; CARDIOVASCULAR DISEASE; CARDIOVASCULAR RISK; CCL2 GENE; CCL7 GENE; CCR2 GENE; COHORT ANALYSIS; CONTROLLED STUDY; COS-7 CELL LINE; DISEASE EXACERBATI…	FRONT CARDIOVASC MED	FRONT. CARDIOVASC. MED.	ENGLISH	FRONTIERS MEDIA S.A.	2022	A. TUGORES; UNIDAD DE INVESTIGACIÓN, COMPLEJO HOSPITALARIO UNIVERSITARIO INSULAR MATERNO-INFANTIL, LAS PALMAS DE GRAN CANARIA, SPAIN; EMAIL: ATUGORES@YAHOO.COM	2297055X	FRONTIERS IN CARDIOVASCULAR MEDICINE	1	A COMMON VARIANT AT THE 3UNTRANSLATED REGION OF THE CCL7 GENE RS17735770 IS ASSOCIATED WITH DECREASED SUSCEPTIBILITY TO CORONARY HEART DISEASE	9	ISI	COMPLEJO HOSPITALARIO UNIVERSITARIO INSULAR MATERNO-INFANTIL;IMDEA RESEARCH INSTITUTE OF FOOD AND HEALTH SCIENCES;UNIVERSIDAD DE LAS PALMAS DE GRAN CANARIA;HOSPITAL UNIVERSITARIO GRAN CANARIA DOCTOR NEGRÍN;COMPLEJO HOSPITALARIO UNIVERSITARIO INSULAR MATERNO-INFANTIL;COMPLEJO HOSPITALARIO UNIVERSITARIO INSULAR MATERNO-INFANTIL	A. TUGORES;COMPLEJO HOSPITALARIO UNIVERSITARIO INSULAR MATERNO-INFANTIL;EMAIL: ATUGORES@YAHOO.COM		MEDINA-GIL JM, 2022, FRONT CARDIOVASC MED	MEDINA-GIL JM, 2022, FRONT CARDIOVASC MED
MEYRE D;ANDRESS E;SHARMA T;SNIPPE M;ASIF H;MAHARAJ A;VATIN V;GAGET S;BESNARD P;CHOQUET H;FROGUEL P;LINTON K	ADZHUBEI IVAN, 2013, CURR PROTOC HUM GENET, VCHAPTER 7, DOI 10.1002/0471142905.HG0720S76;AITMAN TJ, 1999, NAT GENET, V21, P76, DOI 10.1038/5013;ALTSCHUL SF, 1990, J MOL BIOL, V215, P403, DOI 10.1006/JMBI.1990.9999;ANONYMOUS, 2015, NAT REV DIS PRIMERS, V1, P15039, DOI 10.1038/NRDP.2015.39;BENDL J, 2016, PLOS COMPUT BIOL, V12, DOI 10.1371/JOURNAL.PCBI.1004962;DIXON PH, 2000, HUM MOL GENET, V9, P120…	WE SEQUENCED CODING REGIONS OF THE CLUSTER OF DIFFERENTIATION 36 (CD36) GENE IN 184 FRENCH INDIVIDUALS OF EUROPEAN ANCESTRY PRESENTING SIMULTANEOUSLY WITH TYPE 2 DIABETES (T2D), ARTERIAL HYPERTENSION, DYSLIPIDEMIA, AND CORONARY HEART DISEASE. WE IDENTIFIED RARE MISSENSE MUTATIONS (P.PRO191LEU/RS143150225 AND P.ALA252VAL/RS147624636) IN TWO HETEROZYGOUS CASES. THE TWO CD36 MUTATION CARRIERS HAD NO…	MCMASTER UNIV, DEPT HLTH RES METHODS EVIDENCE & IMPACT, HAMILTON, ON, CANADA.; MCMASTER UNIV, DEPT PATHOL & MOL MED, HAMILTON, ON, CANADA.; LILLE UNIV, PASTEUR INST LILLE, CNRS UMR8199, LILLE, FRANCE.; QUEEN MARY UNIV LONDON, BARTS & LONDON SCH MED & DENT, BLIZARD INST, CTR CELL BIOL & CUTANEOUS RES, LONDON, ENGLAND.; UNIV BOURGOGNE FRANCHE COMTE, AGROSUPDIJON, INSERM, UMR LIPIDES NUTR CANC U1231…		10.1038/s41598-019-53388-8	ARTICLE	SCAVENGER RECEPTOR CD36; MULTIPLE SEQUENCE ALIGNMENT; LOW-DENSITY-LIPOPROTEIN; INSULIN-RESISTANCE; SOLUBLE CD36; ATHEROSCLEROSIS; PLASMA; ACID; IDENTIFICATION; PATHOGENICITY	SCI REP-UK	SCI REP	ENGLISH	NATURE PORTFOLIO	2019	MEYRE, D (CORRESPONDING AUTHOR), MCMASTER UNIV, DEPT HLTH RES METHODS EVIDENCE & IMPACT, HAMILTON, ON, CANADA.; MEYRE, D (CORRESPONDING AUTHOR), MCMASTER UNIV, DEPT PATHOL & MOL MED, HAMILTON, ON, CANADA.; MEYRE, D; FROGUEL, P (CORRESPONDING AUTHOR), LILLE UNIV, PASTEUR INST LILLE, CNRS UMR8199, LILLE, FRANCE.; LINTON, KJ (CORRESPONDING AUTHOR), QUEEN MARY UNIV LONDON, BARTS & LONDON SCH MED & DE…	2045-2322	SCIENTIFIC REPORTS	5	CONTRIBUTION OF RARE CODING MUTATIONS IN ICD36I TO TYPE 2 DIABETES AND CARDIOMETABOLIC COMPLICATIONS	9	ISI	MCMASTER UNIVERSITY; MCMASTER UNIVERSITY; UNIVERSITE DE LILLE - ISITE; UNIVERSITE DE LILLE; CENTRE NATIONAL DE LA RECHERCHE SCIENTIFIQUE (CNRS); CNRS - NATIONAL INSTITUTE FOR BIOLOGY (INSB); LE RESEAU INTERNATIONAL DES INSTITUTS PASTEUR (RIIP); INSTITUT PASTEUR LILLE; UNIVERSITY OF LONDON; QUEEN MARY UNIVERSITY LONDON; INSTITUT NATIONAL DE LA SANTE ET DE LA RECHERCHE MEDICALE (INSERM); INSTITUT A…	MCMASTER UNIV;MCMASTER UNIV;NOTREPORTED;LILLE UNIV;QUEEN MARY UNIV LONDON;IMPERIAL COLL LONDON		MEYRE D, 2019, SCI REP-UK	MEYRE D, 2019, SCI REP-UK
MORDI I;LUMBERS R;PALMER C;PEARSON E;SATTAR N;HOLMES M;LANG C	none	OBJECTIVE THE AIM OF THIS STUDY WAS TO USE MENDELIAN RANDOMIZATION (MR) TECHNIQUES TO ESTIMATE THE CAUSAL RELATIONSHIPS BETWEEN GENETIC LIABILITY TO TYPE 2 DIABETES (T2D), GLYCEMIC TRAITS, AND RISK OF HEART FAILURE (HF). RESEARCH DESIGN AND METHODS SUMMARY-LEVEL DATA WERE OBTAINED FROM GENOME-WIDE ASSOCIATION STUDIES OF T2D, INSULIN RESISTANCE (IR), GLYCATED HEMOGLOBIN, FASTING INSULIN AND GLUCOS…	DIVISION OF MOLECULAR AND CLINICAL MEDICINE, UNIVERSITY OF DUNDEE, DUNDEE, UNITED KINGDOM; INSTITUTE OF HEALTH INFORMATICS, UNIVERSITY COLLEGE LONDON, LONDON, UNITED KINGDOM; HEALTH DATA RESEARCH UK LONDON, UNIVERSITY COLLEGE LONDON, UNITED KINGDOM; UCL BRITISH HEART FOUNDATION RESEARCH ACCELERATOR, LONDON, UNITED KINGDOM; DIVISION OF POPULATION HEALTH AND GENOMICS, UNIVERSITY OF DUNDEE, DUNDEE, …		10.2337/DC20-2518	ARTICLE	DIABETES MELLITUS; TYPE 2; GENOME-WIDE ASSOCIATION STUDY; HEART FAILURE; HUMANS; MENDELIAN RANDOMIZATION ANALYSIS; POLYMORPHISM; SINGLE NUCLEOTIDE; RISK FACTORS; ACETYLSALICYLIC ACID; GLUCOSE; GLYCOSYLATED HEMOGLOBIN; HIGH DENSITY LIPOPROTEIN; HYDROXYMETHYLGLUTARYL COENZYME A REDUCTASE INHIBITOR; INSULIN; TRIACYLGLYCEROL; ARTICLE; BLOOD PRESSURE; BODY MASS; CARDIOVASCULAR RISK; CORONARY ARTERY DI…	DIABETES CARE	DIABETES CARE	ENGLISH	AMERICAN DIABETES ASSOCIATION INC.	2021	I.R. MORDI; DIVISION OF MOLECULAR AND CLINICAL MEDICINE, UNIVERSITY OF DUNDEE, DUNDEE, UNITED KINGDOM; EMAIL: I.MORDI@DUNDEE.AC.UK	01495992	DIABETES CARE	11	TYPE 2 DIABETES METABOLIC TRAITS AND RISK OF HEART FAILURE A MENDELIAN RANDOMIZATION STUDY	44	ISI	UNIVERSITY OF DUNDEE;UNIVERSITY COLLEGE LONDON;UNIVERSITY COLLEGE LONDON;UCL BRITISH HEART FOUNDATION RESEARCH ACCELERATOR;UNIVERSITY OF DUNDEE;UNIVERSITY OF GLASGOW;UNIVERSITY OF OXFORD;UNIVERSITY OF OXFORD	NOTREPORTED;UNIVERSITY OF DUNDEE;NOTREPORTED		MORDI IR, 2021, DIABETES CARE	MORDI IR, 2021, DIABETES CARE
MORDI I;TRUCCO E;SYED M;MACGILLIVRAY T;NAR A;HUANG Y;GEORGE G;HOGG S;RADHA V;PRATHIBA V;ANJANA R;MOHAN V;PALMER C;PEARSON E;LANG C;DONEY A	AMER DIABET ASSOC, 2021, DIABETES CARE, V44, PS125, DOI 10.2337/DC21-S010;ARNETT DK, 2019, CIRCULATION, V140, PE563, DOI 10.1161/CIR.0000000000000677, 10.1161/CIR.0000000000000678, 10.1016/J.JACC.2019.03.010, 10.1016/J.JACC.2019.03.009;CHEUNG CY, 2012, AM J OPHTHALMOL, V154, P663, DOI 10.1016/J.AJO.2012.04.016;CHEUNG CYL, 2011, OPHTHALMOLOGY, V118, P812, DOI 10.1016/J.OPHTHA.2010.08.045;CHEUNG N,…	OBJECTIVE IMPROVED IDENTIFICATION OF INDIVIDUALS WITH TYPE 2 DIABETES AT HIGH CARDIOVASCULAR (CV) RISK COULD HELP IN SELECTION OF NEWER CV RISK-REDUCING THERAPIES. THE AIM OF THIS STUDY WAS TO DETERMINE WHETHER RETINAL VASCULAR PARAMETERS, DERIVED FROM RETINAL SCREENING PHOTOGRAPHS, ALONE AND IN COMBINATION WITH A GENOME-WIDE POLYGENIC RISK SCORE FOR CORONARY HEART DISEASE (CHD PRS) WOULD HAVE IN…	UNIV DUNDEE, SCH MED, DIV MOL & CLIN MED, DUNDEE, SCOTLAND.; UNIV DUNDEE, SCH SCI & ENGN, VAMPIRE PROJECT, COMP, DUNDEE, SCOTLAND.; UNIV EDINBURGH, CTR CLIN BRAIN SCI, VAMPIRE PROJECT, EDINBURGH, MIDLOTHIAN, SCOTLAND.; UNIV DUNDEE, SCH MED, DIV POPULAT HLTH & GENOM, DUNDEE, SCOTLAND.; MADRAS DIABET RES FDN & DR MOHANS DIABET SPECIAL, CHENNAI, TAMIL NADU, INDIA.;		10.2337/dc21-1124	ARTICLE	CORONARY-HEART-DISEASE; ATHEROSCLEROSIS RISK; MICROVASCULAR ABNORMALITIES; BLOOD-PRESSURE; MORTALITY; ACCURACY; RETINOPATHY; DIAMETERS; STROKE; SCORE	DIABETES CARE	DIABETES CARE	ENGLISH	AMER DIABETES ASSOC	2022	MORDI, IR (CORRESPONDING AUTHOR), UNIV DUNDEE, SCH MED, DIV MOL & CLIN MED, DUNDEE, SCOTLAND.; DONEY, ASF (CORRESPONDING AUTHOR), UNIV DUNDEE, SCH MED, DIV POPULAT HLTH & GENOM, DUNDEE, SCOTLAND.	0149-5992	DIABETES CARE	10	PREDICTION OF MAJOR ADVERSE CARDIOVASCULAR EVENTS FROM RETINAL CLINICAL AND GENOMIC DATA IN INDIVIDUALS WITH TYPE 2 DIABETES A POPULATION COHORT STUDY	45	ISI	UNIVERSITY OF DUNDEE; UNIVERSITY OF DUNDEE; UNIVERSITY OF EDINBURGH; UNIVERSITY OF DUNDEE; MADRAS DIABETES RESEARCH FOUNDATION	UNIV DUNDEE;UNIV DUNDEE		MORDI IR, 2022, DIABETES CARE	MORDI IR, 2022, DIABETES CARE
NATARAJAN P;PAMPANA A;GRAHAM S;RUOTSALAINEN S;PERRY J;DE V P;BROOME J;PIRRUCCELLO J;HONIGBERG M;ARAGAM K;WOLFORD B;BRODY J;ANTONACCI-FULTON L;ARDEN M;ASLIBEKYAN S;ASSIMES T;BALLANTYNE C;BIELAK L;BIS J;CADE B;DO R;DODDAPANENI H;EMERY L;HUNG Y;IRVIN M;KHAN A;LANGE L;LEE J;LEMAITRE R;MARTIN L;METCALF G;MONTASSER M;MOON J;MUZNY D;O'CONNELL J;PALMER N;PERALTA J;PEYSER P;STILP A;TSAI M;WANG F;WEEKS D;Y…	none	AUTOSOMAL GENETIC ANALYSES OF BLOOD LIPIDS HAVE YIELDED KEY INSIGHTS FOR CORONARY HEART DISEASE (CHD). HOWEVER, X CHROMOSOME GENETIC VARIATION IS UNDERSTUDIED FOR BLOOD LIPIDS IN LARGE SAMPLE SIZES. WE NOW ANALYZE GENETIC AND BLOOD LIPID DATA IN A HIGH-COVERAGE WHOLE X CHROMOSOME SEQUENCING STUDY OF 65,322 MULTI-ANCESTRY PARTICIPANTS AND PERFORM REPLICATION AMONG 456,893 EUROPEAN PARTICIPANTS. CO…	CARDIOVASCULAR RESEARCH CENTER, MASSACHUSETTS GENERAL HOSPITAL, BOSTON, MA, UNITED STATES; PROGRAM IN MEDICAL AND POPULATION GENETICS, BROAD INSTITUTE, CAMBRIDGE, MA, UNITED STATES; DEPARTMENT OF MEDICINE, HARVARD MEDICAL SCHOOL, BOSTON, MA, UNITED STATES; DEPARTMENT OF INTERNAL MEDICINE: CARDIOLOGY, UNIVERSITY OF MICHIGAN, ANN ARBOR, MI, UNITED STATES; INSTITUTE FOR MOLECULAR MEDICINE FINLAND, U…		10.1038/s41467-021-22339-1	ARTICLE	CARDIOMETABOLIC RISK FACTORS; CHROMOSOMES; HUMAN; X; EYE PROTEINS; FEMALE; GENE EXPRESSION REGULATION; GENETIC ASSOCIATION STUDIES; GENETIC LOCI; GENETIC PREDISPOSITION TO DISEASE; GENOTYPE; HUMANS; LIPIDS; MALE; MIDDLE AGED; NERVE TISSUE PROTEINS; PHENOMICS; POLYMORPHISM; SINGLE NUCLEOTIDE; SUBCUTANEOUS TISSUE; WHOLE GENOME SEQUENCING; APOLIPOPROTEIN B; CHOLESTEROL; FAT; GLUTEOFEMORAL FAT; LIPID…	NAT COMMUN	NAT. COMMUN.	ENGLISH	NATURE RESEARCH	2021	P. NATARAJAN; CARDIOVASCULAR RESEARCH CENTER, MASSACHUSETTS GENERAL HOSPITAL, BOSTON, UNITED STATES; EMAIL: PNATARAJAN@MGH.HARVARD.EDU; G.M. PELOSO; DEPARTMENT OF BIOSTATISTICS, BOSTON UNIVERSITY SCHOOL OF PUBLIC HEALTH, BOSTON, UNITED STATES; EMAIL: GPELOSO@BU.EDU	20411723	NATURE COMMUNICATIONS	12	CHROMOSOME XQ23 IS ASSOCIATED WITH LOWER ATHEROGENIC LIPID CONCENTRATIONS AND FAVORABLE CARDIOMETABOLIC INDICES	12	ISI	CARDIOVASCULAR RESEARCH CENTER;BROAD INSTITUTE;HARVARD MEDICAL SCHOOL;UNIVERSITY OF MICHIGAN;UNIVERSITY OF HELSINKI;UNIVERSITY OF MARYLAND SCHOOL OF MEDICINE;THE UNIVERSITY OF TEXAS HEALTH SCIENCE CENTER AT HOUSTON;UNIVERSITY OF WASHINGTON;UNIVERSITY OF MICHIGAN;UNIVERSITY OF WASHINGTON;WASHINGTON UNIVERSITY SCHOOL OF MEDICINE;WASHINGTON UNIVERSITY IN ST. LOUIS;ICHAN SCHOOL OF MEDICINE AT MOUNT S…	NOTREPORTED;CARDIOVASCULAR RESEARCH CENTER;NOTREPORTED;NOTREPORTED;BOSTON UNIVERSITY SCHOOL OF PUBLIC HEALTH;NOTREPORTED		NATARAJAN P, 2021, NAT COMMUN	NATARAJAN P, 2021, NAT COMMUN
NEMOTO M;NISHIMURA R;SASAKI T;HIKI Y;MIYASHITA Y;NISHIOKA M;FUJIMOTO K;SAKUMA T;OHASHI T;FUKUDA K;ETO Y;TAJIMA C;DINA C;DURAND E;FROGUEL P	none	BACKGROUND: ALTHOUGH OXIDATIVE STRESS BY ACCUMULATION OF REACTIVE OXYGEN SPECIES (ROS) IN DIABETES HAS BECOME EVIDENT, IT REMAINS UNCLEAR WHAT GENES, INVOLVED IN REDOX BALANCE, WOULD DETERMINE SUSCEPTIBILITY FOR DEVELOPMENT OF ATHEROSCLEROSIS IN DIABETES. THIS STUDY EVALUATED THE EFFECT OF GENETIC POLYMORPHISM OF ENZYMES PRODUCING OR RESPONSIBLE FOR REDUCING ROS ON CORONARY ARTERY CALCIFICATION I…	DIVISION OF DIABETES METABOLISM AND ENDOCRINOLOGY, DEPARTMENT OF INTERNAL MEDICINE, JIKEI UNIVERSITY SCHOOL OF MEDICINE, TOKYO, JAPAN; DEPARTMENT OF GENE THERAPY, INSTITUTE OF DNA MEDICINE, JIKEI UNIVERSITY SCHOOL OF MEDICINE, TOKYO, JAPAN; DEPARTMENT OF RADIOLOGY, JIKEI UNIVERSITY SCHOOL OF MEDICINE, TOKYO, JAPAN;CNRS INSTITUTE OF BIOLOGY, INSTITUT PASTEUR DE LILLE, LILLE, FRANCE; HAMMERSMITH GE…	CHD; FASTING GLUCOSE; HDL; INSULIN; METABOLIC SYNDROME; OBESITY; PAI-1; TRIGLYCERIDES; TYPE 2 DIABETES MELLITUS	10.1186/1475-2840-6-23 10.1007/s00125-003-1170-0	ARTICLE ARTICLE	AMINO ACID SUBSTITUTION; CALCINOSIS; CASE-CONTROL STUDIES; CORONARY DISEASE; DIABETES MELLITUS; TYPE 2; DIABETIC ANGIOPATHIES; FEMALE; GENOTYPE; GLUTATHIONE PEROXIDASE; HUMANS; MALE; MIDDLE AGED; POLYMERASE CHAIN REACTION; TOMOGRAPHY; X-RAY COMPUTED; BETA 3 ADRENERGIC RECEPTOR; CALPAIN 10; CATALASE; COPPER ZINC SUPEROXIDE DISMUTASE; FATTY ACID TRANSPORT PROTEIN 4; FATTY ACID TRANSPORTER; GLUCOSE;…	CARDIOVASC DIABETOL DIABETOLOGIA	CARDIOVASC. DIABETOL. DIABETOLOGIA	ENGLISH ENGLISH		2007	M. NEMOTO; DIVISION OF DIABETES METABOLISM AND ENDOCRINOLOGY, DEPARTMENT OF INTERNAL MEDICINE, JIKEI UNIVERSITY SCHOOL OF MEDICINE, TOKYO, JAPAN; EMAIL: MNEMOTO@KJE.BIGLOBE.NE.JP P. FROGUEL; CNRS 8090-INSTITUTE OF BIOLOGY, INSTITUT PASTEUR DE LILLE, 59021 LILLE, 1 RUE DU PROFESSEUR CALMETTE, FRANCE; EMAIL: FROGUEL@MAIL-GOOD.PASTEUR-LILLE.FR	14752840 0012186X	CARDIOVASCULAR DIABETOLOGY DIABETOLOGIA	80	GENETIC ASSOCIATION OF GLUTATHIONE PEROXIDASE1 WITH CORONARY ARTERY CALCIFICATION IN TYPE 2 DIABETES A CASE CONTROL STUDY WITH MULTISLICE COMPUTED TOMOGRAPHY PAI1 POLYMORPHISMS MODULATE PHENOTYPES ASSOCIATED WITH THE METABOLIC SYNDROME IN OBESE AND DIABETIC CAUCASIAN POPULATION	6 46	ISI	JIKEI UNIVERSITY SCHOOL OF MEDICINE;JIKEI UNIVERSITY SCHOOL OF MEDICINE;JIKEI UNIVERSITY SCHOOL OF MEDICINE;CNRS INSTITUTE OF BIOLOGY;IMPERIAL COLLEGE;FRANCE	NOTREPORTED;JIKEI UNIVERSITY SCHOOL OF MEDICINE;NOTREPORTED;NOTDECLARED;NOTREPORTED		NEMOTO M, 2007, CARDIOVASC DIABETOL DIABETOLOGIA	NEMOTO M, 2007, CARDIOVASC DIABETOL DIABETOLOGIA
NEWNHAM J;MOSS T;NITSOS I;SLOBODA D;CHALLIS J	none	THERE IS NOW OVERWHELMING EVIDENCE THAT MUCH OF OUR PREDISPOSITION TO ADULT ILLNESS IS DETERMINED BY THE TIME OF BIRTH. THESE DISEASES APPEAR TO RESULT FROM INTERACTIONS BETWEEN OUR GENES, OUR INTRAUTERINE ENVIRONMENT AND OUR POSTNATAL LIFESTYLE. THOSE AT GREATEST RISK ARE INDIVIDUALS IN COMMUNITIES MAKING A RAPID TRANSITION FROM LIVES OF 'THRIFT' TO A LIVES OF 'PLENTY'. FROM A GLOBAL PERSPECTIVE…	SCHOOL OF WOMEN'S AND INFANTS' HEALTH, UNIVERSITY OF WESTERN AUSTRALIA, KING EDWARD MEMORIAL HOSPITAL FOR WOMEN, PERTH, WESTERN AUSTRALIA, AUSTRALIA		10.1046/j.1440-6047.11.supp3.11.x	ARTICLE	ADULT; CHRONIC DISEASE; CORONARY DISEASE; DIABETES MELLITUS; TYPE 2; FEMALE; GENETIC PREDISPOSITION TO DISEASE; HUMANS; HYDROCORTISONE; INFANT; NEWBORN; LIFE STYLE; NUTRITION DISORDERS; PREGNANCY; PRENATAL EXPOSURE DELAYED EFFECTS; PRENATAL NUTRITION PHYSIOLOGY; HYDROCORTISONE; ADULT; ARTICLE; BLOOD; CHRONIC DISEASE; CORONARY ARTERY DISEASE; FEMALE; GENETIC PREDISPOSITION; HUMAN; LIFESTYLE; MATER…	ASIA PAC J CLIN NUTR	ASIA PAC J CLIN NUTR	ENGLISH		2002	J.P. NEWNHAM; EMAIL: JNEWNHAM@OBSGYN.UWA.EDU.AU	09647058	ASIA PACIFIC JOURNAL OF CLINICAL NUTRITION	30	NUTRITION AND THE EARLY ORIGINS OF ADULT DISEASE	11 SUPPL 3	ISI	UNIVERSITY OF WESTERN AUSTRALIA	NOTREPORTED;NOTREPORTED		NEWNHAM JP, 2002, ASIA PAC J CLIN NUTR	NEWNHAM JP, 2002, ASIA PAC J CLIN NUTR
NISHIHAMA K;YAMADA Y;MATSUO H;SEGAWA T;WATANABE S;KATO K;YAJIMA K;HIBINO T;YOKOI K;ICHIHARA S;METOKI N;YOSHIDA H;SATOH K;NOZAWA Y	none	THE PURPOSE OF THE PRESENT STUDY WAS TO ASSESS THE GENETIC RISK FOR MYOCARDIAL INFARCTION (MI) IN INDIVIDUALS WITH OR WITHOUT CONVENTIONAL CORONARY RISK FACTORS AND THEREBY TO CONTRIBUTE TO THE PERSONALIZED PREVENTION OF MI IN SUCH INDIVIDUALS. THE STUDY POPULATION COMPRISED 3483 UNRELATED JAPANESE INDIVIDUALS (1913 MEN, 1570 WOMEN). THE 1192 SUBJECTS WITH MI (926 MEN, 266 WOMEN) AND 2291 CONTROL…	DEPARTMENT OF HUMAN FUNCTIONAL GENOMICS, LIFE SCIENCE RESEARCH CENTER, MIE UNIVERSITY, TSU, MIE 514-8507, 1577 KURIMA-MACHIYA, JAPAN; GIFU INTERNATIONAL INSTITUTE OF BIOTECHNOLOGY, KAKAMIGAHARA, JAPAN; DEPARTMENT OF CARDIOLOGY, GIFU PREFECTURAL GIFU HOSPITAL, GIFU, JAPAN; DEPARTMENT OF CARDIOVASCULAR MEDICINE, GIFU PREFECTURAL TAJIMI HOSPITAL, TAJIMI, JAPAN; DEPARTMENT OF INTERNAL MEDICINE, HIROS…	CORONARY HEART DISEASE; GENETICS; MYOCARDIAL INFARCTION; POLYMORPHISM; RISK FACTOR	10.3892/ijmm.19.1.129	ARTICLE	CASE-CONTROL STUDIES; DIABETES MELLITUS; TYPE 2; FEMALE; GENETIC PREDISPOSITION TO DISEASE; HUMANS; HYPERCHOLESTEROLEMIA; HYPERTENSION; LOGISTIC MODELS; MALE; MULTIVARIATE ANALYSIS; MYOCARDIAL INFARCTION; POLYMORPHISM; GENETIC; RISK FACTORS; ARTICLE; CASE CONTROL STUDY; FEMALE; GENETIC POLYMORPHISM; GENETIC PREDISPOSITION; GENETICS; HEART INFARCTION; HUMAN; HYPERCHOLESTEROLEMIA; HYPERTENSION; MAL…	INT J MOL MED	INT. J. MOL. MED.	ENGLISH	SPANDIDOS PUBLICATIONS	2007	Y. YAMADA; DEPARTMENT OF HUMAN FUNCTIONAL GENOMICS, LIFE SCIENCE RESEARCH CENTER, MIE UNIVERSITY, TSU, MIE 514-8507, 1577 KURIMA-MACHIYA, JAPAN; EMAIL: YAMADA@GENE.MIE-U.AC.JP	11073756	INTERNATIONAL JOURNAL OF MOLECULAR MEDICINE	25	ASSOCIATION OF GENE POLYMORPHISMS WITH MYOCARDIAL INFARCTION IN INDIVIDUALS WITH OR WITHOUT CONVENTIONAL CORONARY RISK FACTORS	19	ISI	MIE UNIVERSITY;GIFU INTERNATIONAL INSTITUTE OF BIOTECHNOLOGY;GIFU PREFECTURAL GIFU HOSPITAL;GIFU PREFECTURAL TAJIMI HOSPITAL;HIROSAKI STROKE CENTER;HIROSAKI UNIVERSITY SCHOOL OF MEDICINE	NOTREPORTED;MIE UNIVERSITY;NOTREPORTED		NISHIHAMA K, 2007, INT J MOL MED	NISHIHAMA K, 2007, INT J MOL MED
NORDQUIST N;GÖKTÜRK C;COMASCO E;EENSOO D;MERENÄKK L;VEIDEBAUM T;ORELAND L;HARRO J	none	INSULIN RESISTANCE AND CENTRAL ADIPOSITY ARE STRONG RISK INDICATORS FOR TYPE 2 DIABETES AND CORONARY HEART DISEASE. AN IMPORTANT ROLE FOR ADIPOSE TISSUE IN THE ETIOLOGY AND PROGRESSION OF THESE CONDITIONS HAS RECENTLY BECOME MORE EVIDENT. A TRANSCRIPTION FACTOR, TFAP2B, HAS BEEN SHOWN TO PARTICIPATE IN THE REGULATION OF ADIPOCYTE METABOLISM, BY FACILITATING GLUCOSE UPTAKE AND LIPID ACCUMULATION, …	SECTION OF PHARMACOLOGY, DEPARTMENT OF NEUROSCIENCE, UPPSALA UNIVERSITY, UPPSALA, SWEDEN; CENTER FOR CLINICAL RESEARCH, UPPSALA UNIVERSITY, CENTRAL HOSPITAL, VÄSTERS, SWEDEN; DEPARTMENT OF PUBLIC HEALTH, CENTRE OF BEHAVIORAL AND HEALTH SCIENCES, UNIVERSITY OF TARTU, TARTU, ESTONIA; NATIONAL INSTITUTE FOR HEALTH DEVELOPMENT, TALLINN, ESTONIA; DEPARTMENT OF PSYCHOLOGY, CENTRE OF BEHAVIORAL AND HEAL…		10.1038/oby.2009.83	ARTICLE	ADIPONECTIN; ADIPOSITY; ADOLESCENT; BLOOD GLUCOSE; FEMALE; GENETIC PREDISPOSITION TO DISEASE; HEALTH SURVEYS; HUMANS; INSULIN; INSULIN RESISTANCE; INTRONS; LINKAGE DISEQUILIBRIUM; MALE; PHENOTYPE; POLYMORPHISM; GENETIC; SEX FACTORS; SKINFOLD THICKNESS; TANDEM REPEAT SEQUENCES; TRANSCRIPTION FACTOR AP-2; ADIPONECTIN; ADIPONECTIN; HUMAN; INSULIN; TFAP2B PROTEIN; HUMAN; TRANSCRIPTION FACTOR AP 2; AD…	OBESITY	OBESITY	ENGLISH		2009	N. NORDQUIST; SECTION OF PHARMACOLOGY, DEPARTMENT OF NEUROSCIENCE, UPPSALA UNIVERSITY, UPPSALA, SWEDEN; EMAIL: NIKLAS.NORDQUIST@NEURO.UU.SE	1930739X	OBESITY	18	THE TRANSCRIPTION FACTOR TFAP2B IS ASSOCIATED WITH INSULIN RESISTANCE AND ADIPOSITY IN HEALTHY ADOLESCENTS	17	ISI	UPPSALA UNIVERSITY;UPPSALA UNIVERSITY;UNIVERSITY OF TARTU;NATIONAL INSTITUTE FOR HEALTH DEVELOPMENT;UNIVERSITY OF TARTU	NOTREPORTED;UPPSALA UNIVERSITY;NOTREPORTED		NORDQUIST N, 2009, OBESITY	NORDQUIST N, 2009, OBESITY
NTALLA I;KANONI S;ZENG L;GIANNAKOPOULOU O;DANESH J;WATKINS H;SAMANI N;DELOUKAS P;SCHUNKERT H	none	BACKGROUND: THE TAXONOMY OF CARDIOVASCULAR (CV) DISEASES IS DIVIDED INTO A BROAD SPECTRUM OF CLINICAL ENTITIES. MANY SUCH DISEASES COINCIDE IN SPECIFIC PATIENT GROUPS AND SUGGEST SHARED PREDISPOSITION. OBJECTIVES: THIS STUDY FOCUSED ON CORONARY ARTERY DISEASE (CAD) AND INVESTIGATED THE GENETIC RELATIONSHIP TO CV AND NON-CV DISEASES WITH REPORTED CAD COMORBIDITY. METHODS: THIS STUDY EXAMINED 425,1…	CLINICAL PHARMACOLOGY, WILLIAM HARVEY RESEARCH INSTITUTE, BARTS AND THE LONDON MEDICAL SCHOOL, QUEEN MARY UNIVERSITY OF LONDON, LONDON, UNITED KINGDOM; CENTRE FOR GENOMIC HEALTH, QUEEN MARY UNIVERSITY OF LONDON, LONDON, UNITED KINGDOM; DEUTSCHES HERZZENTRUM MÜNCHEN, KLINIK FÜR HERZ UND KREISLAUFERKRANKUNGEN, TECHNISCHE UNIVERSITÄT MÜNCHEN, MUNICH, GERMANY; MRC/BHF CARDIOVASCULAR EPIDEMIOLOGY UNIT…	CARDIOVASCULAR DISEASES; CORONARY ARTERY DISEASE; GENETIC RISK SCORE; HEART FAILURE; MIGRAINE; UK BIOBANK	10.1016/j.jacc.2019.03.512	ARTICLE	ADULT; AGED; ARTHRITIS; RHEUMATOID; BIOLOGICAL SPECIMEN BANKS; COHORT STUDIES; CORONARY ARTERY DISEASE; FEMALE; GENETIC PREDISPOSITION TO DISEASE; HUMANS; HYPERCHOLESTEROLEMIA; HYPERTENSION; KIDNEY DISEASES; LONGITUDINAL STUDIES; MALE; MIDDLE AGED; PROSPECTIVE STUDIES; RISK ASSESSMENT; RISK FACTORS; UNITED KINGDOM; ABDOMINAL AORTIC ANEURYSM; ACUTE KIDNEY FAILURE; ADULT; AGED; AORTIC STENOSIS; ART…	J AM COLL CARDIOL	J. AM. COLL. CARDIOL.	ENGLISH	ELSEVIER USA	2019	P. DELOUKAS; WILLIAM HARVEY RESEARCH INSTITUTE, QUEEN MARY UNIVERSITY OF LONDON, LONDON, CHARTERHOUSE SQUARE, EC1M 6BQ, UNITED KINGDOM; EMAIL: P.DELOUKAS@QMUL.AC.UK	07351097	JOURNAL OF THE AMERICAN COLLEGE OF CARDIOLOGY	44	GENETIC RISK SCORE FOR CORONARY DISEASE IDENTIFIES PREDISPOSITIONS TO CARDIOVASCULAR AND NONCARDIOVASCULAR DISEASES	73	ISI	QUEEN MARY UNIVERSITY OF LONDON;QUEEN MARY UNIVERSITY OF LONDON;TECHNISCHE UNIVERSITÄT MÜNCHEN;UNIVERSITY OF CAMBRIDGE;UNIVERSITY OF CAMBRIDGE;WELLCOME TRUST SANGER INSTITUTE;UNIVERSITY OF OXFORD;UNIVERSITY OF OXFORD;UNIVERSITY OF LEICESTER;NATIONAL INSTITUTE FOR HEALTH RESEARCH LEICESTER CARDIOVASCULAR BIOMEDICAL RESEARCH CENTRE;KING ABDULAZIZ UNIVERSITY;DEUTSCHES ZENTRUM FÜR HERZ UND KREISLAUFE…	NOTREPORTED;QUEEN MARY UNIVERSITY OF LONDON;NOTREPORTED		NTALLA I, 2019, J AM COLL CARDIOL	NTALLA I, 2019, J AM COLL CARDIOL
ODAWARA M	none	GENETIC PREDISPOSITION HAS BEEN IMPLICATED IN THE DEVELOPMENT OF CORONARY HEART DISEASE (CHD). WE MADE A MOLECULAR SCANNING OF SEVERAL GENETIC POLYMORPHISMS TO SEE WHETHER THEY ARE ASSOCIATED WITH CHD IN JAPANESE PATIENTS WITH TYPE 2 DIABETES MELLITUS. AMONG SEVERAL POLYMORPHISMS, ONLY A POLYMORPHISM OF PARAOXONASE GENE WAS CONFIRMED TO BE ASSOCIATED WITH CHD IN THIS POPULATION. THIS POLYMORPHISM…	TOKYO MEDICAL UNIVERSITY, TOKYO, JAPAN			ARTICLE	ARYLDIALKYLPHOSPHATASE; ASIAN CONTINENTAL ANCESTRY GROUP; CORONARY DISEASE; DIABETES MELLITUS; TYPE 2; GENETIC PREDISPOSITION TO DISEASE; GENETIC SCREENING; HUMANS; JAPAN; METHYLENETETRAHYDROFOLATE REDUCTASE (NADPH2); PEPTIDYL-DIPEPTIDASE A; ACE PROTEIN; HUMAN; ARYLDIALKYLPHOSPHATASE; DIPEPTIDYL CARBOXYPEPTIDASE; METHYLENETETRAHYDROFOLATE REDUCTASE (NADPH2); ARTICLE; ASIAN; CORONARY ARTERY DISEAS…	NUCLEIC ACIDS SYMP SER (OXF)	NUCLEIC ACIDS SYMP SER (OXF)	ENGLISH		2004		17468272	NUCLEIC ACIDS SYMPOSIUM SERIES (2004)	0	MOLECULAR SCANNING OF SUSCEPTIBILITY GENES FOR THE DEVELOPMENT OF CORONARY HEART DISEASE IN JAPANESE		ISI	TOKYO MEDICAL UNIVERSITY	TOKYO MEDICAL UNIVERSITY		ODAWARA M, 2004, NUCLEIC ACIDS SYMP SER (OXF)	ODAWARA M, 2004, NUCLEIC ACIDS SYMP SER (OXF)
ODAWARA M;TACHI Y;YAMASHITA K	none	SERUM PARAOXONASE/ARYLESTERASE (PONA) IS ASSOCIATED WITH HIGH-DENSITY LIPOPROTEIN AND MAY PREVENT OXIDATION OF LOW-DENSITY LIPOPROTEIN BY HYDROLYZING LIPID PEROXIDES. A RECENT REPORT SUGGESTED AN ASSOCIATION OF GLUTAMINE (A TYPE)/ARGININE (B TYPE) POLYMORPHISM AT POSITION 192 OF PONA GENE WITH CORONARY HEART DISEASE (CHD) AMONG CAUCASIAN PATIENTS WITH NONINSULIN-DEPENDENT DIABETES MELLITUS (NIDDM…	INSTITUTE OF CLINICAL MEDICINE, UNIVERSITY OF TSUKUBA, IBARAKI, JAPAN; WELLCOME TRUST CTR. FOR HUM. GENET., UNIVERSITY OF OXFORD, OXFORD, UNITED KINGDOM; WELLCOME TRUST CTR. FOR HUM. GENET., UNIVERSITY OF OXFORD, OXFORD, OX3 7BN, WINDMILL ROAD, UNITED KINGDOM		10.1210/jcem.82.7.4096	ARTICLE	ADULT; AGED; AGED; 80 AND OVER; ARYLDIALKYLPHOSPHATASE; CORONARY DISEASE; DIABETES MELLITUS; TYPE 2; ESTERASES; FEMALE; HUMANS; JAPAN; MALE; MIDDLE AGED; POLYMORPHISM; GENETIC; ARGININE; ARYLESTERASE; DNA; GLUTAMINE; HIGH DENSITY LIPOPROTEIN; LIPID PEROXIDE; LOW DENSITY LIPOPROTEIN; ARYLDIALKYLPHOSPHATASE; ESTERASE; ADULT; AGED; ARTICLE; CONTROLLED STUDY; DNA POLYMORPHISM; FEMALE; GENOTYPE; HUMAN…	J CLIN ENDOCRINOL METAB	J. CLIN. ENDOCRINOL. METAB.	ENGLISH	ENDOCRINE SOCIETY	1997		0021972X	JOURNAL OF CLINICAL ENDOCRINOLOGY AND METABOLISM	147	PARAOXONASE POLYMORPHISM GLN192ARG IS ASSOCIATED WITH CORONARY HEART DISEASE IN JAPANESE NONINSULINDEPENDENT DIABETES MELLITUS	82	ISI	UNIVERSITY OF TSUKUBA;UNIVERSITY OF OXFORD;UNIVERSITY OF OXFORD	UNIVERSITY OF TSUKUBA;UNIVERSITY OF OXFORD;UNIVERSITY OF OXFORD		ODAWARA M, 1997, J CLIN ENDOCRINOL METAB	ODAWARA M, 1997, J CLIN ENDOCRINOL METAB
OLIYNYK R	AGARWALA V, 2013, NAT GENET, V45, P1418, DOI 10.1038/NG.2804;ANDERSON CA, 2011, PLOS BIOL, V9, DOI 10.1371/JOURNAL.PBIO.1000580;ANONYMOUS, 2018, J PERS MED, DOI DOI 10.3390/JPM8020016;APARICIO H.J., 2017, STROKE GENETICS, P9, DOI DOI 10.1007/978-3-319-56210-0_2;BANERJEE S, 2018, PLOS GENET, V14, DOI 10.1371/JOURNAL.PGEN.1007856;BARRDAHL M, 2014, HUM MOL GENET, V23, P5260, DOI 10.1093/HMG/DDU223;B…	FOR MORE THAN A DECADE, GENOME-WIDE ASSOCIATION STUDIES HAVE BEEN MAKING STEADY PROGRESS IN DISCOVERING THE CAUSAL GENE VARIANTS THAT CONTRIBUTE TO LATE-ONSET HUMAN DISEASES. POLYGENIC LATE-ONSET DISEASES IN AN AGING POPULATION DISPLAY A RISK ALLELE FREQUENCY DECREASE AT OLDER AGES, CAUSED BY INDIVIDUALS WITH HIGHER POLYGENIC RISK SCORES BECOMING ILL PROPORTIONATELY EARLIER AND BRINGING ABOUT A C…	UNIV AUCKLAND, CTR COMPUTAT EVOLUT, AUCKLAND 1010, NEW ZEALAND.; UNIV AUCKLAND, DEPT COMP SCI, AUCKLAND 1010, NEW ZEALAND.;	GWAS; GENOME-WIDE ASSOCIATION STUDIES; GENETICS; POLYGENIC RISK SCORE; HERITABILITY; LATE-ONSET DISEASE; SIMULATION; GENE VARIANT; SNP	10.3390/jpm9030038	ARTICLE	BREAST-CANCER; MISSING HERITABILITY; PROSTATE-CANCER; NORDIC TWIN; GENETIC ARCHITECTURE; VARIANCE-ESTIMATION; ALZHEIMERS-DISEASE; FAMILIAL RISK; AGE; REGRESSION	J PERS MED	J. PERS. MED.	ENGLISH	MDPI	2019	OLIYNYK, RT (CORRESPONDING AUTHOR), UNIV AUCKLAND, CTR COMPUTAT EVOLUT, AUCKLAND 1010, NEW ZEALAND.; OLIYNYK, RT (CORRESPONDING AUTHOR), UNIV AUCKLAND, DEPT COMP SCI, AUCKLAND 1010, NEW ZEALAND.		JOURNAL OF PERSONALIZED MEDICINE	4	EVALUATING THE POTENTIAL OF YOUNGER CASES AND OLDER CONTROLS COHORTS TO IMPROVE DISCOVERY POWER IN GENOMEWIDE ASSOCIATION STUDIES OF LATEONSET DISEASES	9	ISI	UNIVERSITY OF AUCKLAND; UNIVERSITY OF AUCKLAND	UNIV AUCKLAND;UNIV AUCKLAND		OLIYNYK RT, 2019, J PERS MED	OLIYNYK RT, 2019, J PERS MED
OPSTAD T;PETTERSEN A;WEISS T;ARNESEN H;SELJEFLOT I	none	BACKGROUND: TISSUE FACTOR (TF) AND ITS INHIBITOR TISSUE FACTOR PATHWAY INHIBITOR (TFPI) ARE THE MAIN REGULATORS OF THE INITIATION OF THE COAGULATION PROCESS, IMPORTANT IN ATHEROTHROMBOSIS. IN THIS STUDY WE HAVE INVESTIGATED THE FREQUENCY OF SIX KNOWN TF AND TFPI SINGLE NUCLEOTIDE POLYMORPHISMS (SNPS) IN CHD PATIENTS AS COMPARED TO HEALTHY INDIVIDUALS. THESE GENOTYPES AND THE PHENOTYPES (TF, TFPI …	CENTER FOR CLINICAL HEART RESEARCH, DEPARTMENT OF CARDIOLOGY, OSLO UNIVERSITY HOSPITAL ULLEVAL, OSLO, NORWAY; CENTER FOR CLINICAL RESEARCH, OSLO UNIVERSITY HOSPITAL ULLEVAL, OSLO, NORWAY; FACULTY OF MEDICINE, UNIVERSITY OF OSLO, NORWAY		10.1186/1477-9560-8-7	ARTICLE	ACETYLSALICYLIC ACID; ADENOSINE; CLOPIDOGREL; CYTOSINE; GUANOSINE; THROMBOPLASTIN; THYMIDINE; TISSUE FACTOR PATHWAY INHIBITOR; ADULT; AGED; ALLELE; ANGIOGRAPHY; ARTICLE; CONTROLLED STUDY; FEMALE; GENE FREQUENCY; GENETIC ASSOCIATION; GENETIC VARIABILITY; GENOTYPE PHENOTYPE CORRELATION; HEART INFARCTION; HETEROZYGOSITY; HUMAN; INTRON; ISCHEMIC HEART DISEASE; MAJOR CLINICAL STUDY; MALE; NON INSULIN …	THROMB J	THROMB. J.	ENGLISH		2010	T.B. OPSTAD; CENTER FOR CLINICAL HEART RESEARCH, DEPARTMENT OF CARDIOLOGY, OSLO UNIVERSITY HOSPITAL ULLEVAL, OSLO, NORWAY; EMAIL: TRINEOA@MEDISIN.UIO.NO	14779560	THROMBOSIS JOURNAL	25	GENDER DIFFERENCES OF POLYMORPHISMS IN THE TF AND TFPI GENES AS RELATED TO PHENOTYPES IN PATIENTS WITH CORONARY HEART DISEASE AND TYPE2 DIABETES	8	ISI	OSLO UNIVERSITY HOSPITAL ULLEVAL;OSLO UNIVERSITY HOSPITAL ULLEVAL;UNIVERSITY OF OSLO	NOTREPORTED;OSLO UNIVERSITY HOSPITAL ULLEVAL;NOTREPORTED		OPSTAD TB, 2010, THROMB J	OPSTAD TB, 2010, THROMB J
ORABY H;ELSHAER S;RASHED L;ELDESOKY N	none	BACKGROUND: TYPE 2 DIABETES MELLITUS (T2DM) IS A WORLDWIDE HEALTH PROBLEM. PROLONGED ELEVATED GLUCOSE LEVEL MIGHT CAUSE SERIOUS CARDIOVASCULAR COMPLICATIONS. MICRORNA-499 (MIRNA-499) IS A MUSCLE-SPECIFIC MIRNA EXPRESSED HIGHLY IN NORMAL HEARTS. THE RELATION OF MIRNA-499 RS3746444 A>G GENOTYPE VARIANTS WITH T2DM AND ITS CARDIOVASCULAR COMPLICATION IS STILL VAGUE. OBJECTIVE: THIS STUDY AIMED TO EXP…	BIOCHEMISTRY AND MOLECULAR BIOLOGY DEPARTMENT, FACULTY OF PHARMACY (GIRLS), AL-AZHAR UNIVERSITY, CAIRO, EGYPT; BIOCHEMISTRY DEPARTMENT, FACULTY OF PHARMACY, HELIOPOLIS UNIVERSITY, CAIRO, EGYPT; BIOCHEMISTRY DEPARTMENT, FACULTY OF MEDICINE, CAIRO UNIVERSITY, CAIRO, EGYPT	CORONARY HEART DISEASE; MIRNA-499; MIRNA-499 RS3746444 A>G GENOTYPE VARIANTS; TYPE 2 DIABETES MELLITUS	10.1016/j.genrep.2022.101712	ARTICLE	GLUCOSE; HEMOGLOBIN A1C; HIGH DENSITY LIPOPROTEIN CHOLESTEROL; LOW DENSITY LIPOPROTEIN CHOLESTEROL; MICRORNA; MICRORNA 499; TRIACYLGLYCEROL; UNCLASSIFIED DRUG; ADULT; ALLELE; ARTICLE; CASE CONTROL STUDY; CHOLESTEROL BLOOD LEVEL; CODOMINANCE; CONTROLLED STUDY; DIABETIC CARDIOMYOPATHY; DIABETIC PATIENT; EGYPTIAN; FEMALE; GENE FREQUENCY; GENETIC ASSOCIATION; GENETIC RISK; GENETIC VARIABILITY; HOSPIT…	GENE REP	GENE REP.	ENGLISH	ELSEVIER INC.	2022	N.A.-R. ELDESOKY; BIOCHEMISTRY AND MOLECULAR BIOLOGY DEPARTMENT, FACULTY OF PHARMACY (GIRLS), AL-AZHAR UNIVERSITY, CAIRO, EGYPT; EMAIL: NOHA-BIO@AZHAR.EDU.EG	24520144	GENE REPORTS	9	ASSOCIATION OF MIRNA499 RS3746444 AG GENOTYPE VARIANTS WITH TYPE 2 DIABETES MELLITUS AND ITS CORONARY HEART DISEASE COMPLICATION IN ADULT EGYPTIAN POPULATION	29	ISI	AL-AZHAR UNIVERSITY;HELIOPOLIS UNIVERSITY;CAIRO UNIVERSITY	NOTREPORTED;AL-AZHAR UNIVERSITY;NOTREPORTED		ORABY HES, 2022, GENE REP	ORABY HES, 2022, GENE REP
ORTLEPP J;LAUSCHER J;HOFFMANN R;HANRATH P;JOOST H	none	AIMS: VITAMIN D CAN INFLUENCE LIPOLYSIS AND INSULIN SECRETION. A COMMON GENETIC POLYMORPHISM OF THE VITAMIN D RECEPTOR, WHICH HAS BEEN FOUND TO BE ASSOCIATED WITH BONE MINERAL DENSITY, HAS ALSO BEEN REPORTED TO BE ASSOCIATED WITH INSULIN-DEPENDENT DIABETES MELLITUS. TO TEST THE INFLUENCE OF THE VITAMIN D RECEPTOR POLYMORPHISM ON THE PREVALENCE OF TYPE 2 DIABETES MELLITUS AND CORONARY ARTERY DISEA…	MEDICAL CLINIC I, UNIVERSITY HOSPITAL OF AACHEN, AACHEN, GERMANY; INSTITUTE FOR PHARMACOLOGY AND TOXICOLOGY, UNIVERSITY HOSPITAL OF AACHEN, AACHEN, GERMANY; MEDICAL CLINIC I, UNIVERSITY HOSPITAL OF AACHEN, 52057 AACHEN, PAUWELSSTRASSE 30, GERMANY	CORONARY ARTERY DISEASE; DIABETES MELLITUS; POLYMORPHISM; VITAMIN D RECEPTOR	10.1046/j.1464-5491.2001.00585.x	ARTICLE	CORONARY ANGIOGRAPHY; CORONARY DISEASE; CROSS-SECTIONAL STUDIES; DIABETES MELLITUS; TYPE 2; DNA; FEMALE; GENOTYPE; GERMANY; HETEROZYGOTE DETECTION; HUMANS; MALE; MIDDLE AGED; PREVALENCE; RECEPTORS; CALCITRIOL; SMOKING; VARIATION (GENETICS); VITAMIN D; VITAMIN D RECEPTOR; ADULT; ALLELE; ANGINA PECTORIS; ANGIOCARDIOGRAPHY; ARTICLE; BONE DENSITY; BONE MINERAL; CLINICAL TRIAL; COHORT ANALYSIS; CORONA…	DIABETIC MED	DIABETIC MED.	ENGLISH		2001	J.R. ORTLEPP; MEDICAL CLINIC I, UNIVERSITY HOSPITAL OF AACHEN, 52057 AACHEN, PAUWELSSTRASSE 30, GERMANY; EMAIL: JORT@PCSERVER.MK1.RWTH-AACHEN.DE	07423071	DIABETIC MEDICINE	101	THE VITAMIN D RECEPTOR GENE VARIANT IS ASSOCIATED WITH THE PREVALENCE OF TYPE 2 DIABETES MELLITUS AND CORONARY ARTERY DISEASE	18	ISI	UNIVERSITY HOSPITAL OF AACHEN;UNIVERSITY HOSPITAL OF AACHEN;UNIVERSITY HOSPITAL OF AACHEN	NOTREPORTED;UNIVERSITY HOSPITAL OF AACHEN;NOTREPORTED		ORTLEPP JR, 2001, DIABETIC MED	ORTLEPP JR, 2001, DIABETIC MED
PALMER B;DEVEREAUX C;DHAMRAIT S;MOCATTA T;PILBROW A;FRAMPTON C;SKELTON L;YANDLE T;WINTERBOURN C;MARK A;MONTGOMERY H;CAMERON V	none	BACKGROUND: A VARIANT IN THE PROMOTER OF THE HUMAN UNCOUPLING PROTEIN 2 (UCP2) GENE, THE G-866A POLYMORPHISM, HAS BEEN ASSOCIATED WITH FUTURE RISK OF CORONARY HEART DISEASE EVENTS, IN THOSE DEVOID OF TRADITIONAL RISK FACTORS AND IN THOSE SUFFERING FROM DIABETES. WE THUS EXAMINED THE IMPACT OF THE G-866A POLYMORPHISM ON 5-YEAR SURVIVAL IN A COHORT OF 901 POST-MYOCARDIAL INFARCTION PATIENTS, AND TH…	CHRISTCHURCH CARDIOENDOCRINE RESEARCH GROUP, DEPARTMENT OF MEDICINE, UNIVERSITY OF OTAGO, CHRISTCHURCH, CHRISTCHURCH, PO BOX 4345, NEW ZEALAND; CENTRE FOR CARDIOVASCULAR GENETICS, BRITISH HEART FOUNDATION LABORATORIES, ROYAL FREE AND UNIVERSITY COLLEGE LONDON MEDICAL SCHOOL, LONDON WC1E 6JF, UNITED KINGDOM; FREE RADICAL RESEARCH GROUP, DEPARTMENT OF PATHOLOGY, UNIVERSITY OF OTAGO, CHRISTCHURCH, C…		10.1186/1475-2840-8-31	ARTICLE	COHORT STUDIES; DIABETES MELLITUS; TYPE 2; FEMALE; FOLLOW-UP STUDIES; GENOTYPE; HUMANS; ION CHANNELS; MALE; MIDDLE AGED; MITOCHONDRIAL PROTEINS; MYOCARDIAL INFARCTION; PEROXIDASE; POLYMORPHISM; GENETIC; PROMOTER REGIONS; GENETIC; SURVIVAL RATE; MYELOPEROXIDASE; UNCOUPLING PROTEIN 2; ION CHANNEL; MITOCHONDRIAL PROTEIN; MITOCHONDRIAL UNCOUPLING PROTEIN 2; PEROXIDASE; ADULT; ARTICLE; ATTRIBUTABLE RI…	CARDIOVASC DIABETOL	CARDIOVASC. DIABETOL.	ENGLISH		2009	B.R. PALMER; CHRISTCHURCH CARDIOENDOCRINE RESEARCH GROUP, DEPARTMENT OF MEDICINE, UNIVERSITY OF OTAGO, CHRISTCHURCH, CHRISTCHURCH, PO BOX 4345, NEW ZEALAND; EMAIL: BARRY.PALMER@OTAGO.AC.NZ	14752840	CARDIOVASCULAR DIABETOLOGY	19	THE COMMON G866A POLYMORPHISM OF THE UCP2 GENE AND SURVIVAL IN DIABETIC PATIENTS FOLLOWING MYOCARDIAL INFARCTION	8	ISI	UNIVERSITY OF OTAGO;ROYAL FREE AND UNIVERSITY COLLEGE LONDON MEDICAL SCHOOL;UNIVERSITY OF OTAGO;UNIVERSITY OF DENVER	NOTREPORTED;UNIVERSITY OF OTAGO;NOTREPORTED		PALMER BR, 2009, CARDIOVASC DIABETOL	PALMER BR, 2009, CARDIOVASC DIABETOL
PAN J;TONG R;DENG Q;TIAN Y;WANG N;PENG Y;FEI S;ZHANG W;CUI J;GUO C;YAO J;WEI C;XU J	none	BACKGROUND: SOCS2 IS DOWNREGULATED IN DIABETES, WHICH MIGHT BE RELATED TO DIABETES. WE EXPLORED THE EFFECT OF SOCS2 POLYMORPHISMS ON THE DEVELOPMENT OF TYPE 2 DIABETES MELLITUS (T2DM) AND DIABETIC COMPLICATIONS. METHODS: THE SUBJECTS CONSISTED OF 500 PATIENTS WITH T2DM AND 501 HEALTHY CONTROLS. FIVE VARIANTS IN SOCS2 WERE GENOTYPED BY AGENA MASSARRAY SYSTEM. RT-QPCR PROFILING WAS PERFORMED TO DET…	DEPARTMENT OF GERIATRIC ENDOCRINOLOGY, THE FIRST AFFILIATED HOSPITAL OF XI’AN JIAOTONG UNIVERSITY, SHAANXI, XI’AN, 710061, CHINA; DEPARTMENT OF ENDOCRINOLOGY, XIANYANG CENTRAL HOSPITAL, SHAANXI, XIANYANG, 712000, CHINA; DEPARTMENT OF ENDOCRINOLOGY, NO. 215 HOSPITAL OF SHAANXI NUCLEAR INDUSTRY, SHAANXI, XIANYANG, 712000, CHINA; DEPARTMENT OF BREAST SURGERY, THE FIRST AFFILIATED HOSPITAL OF XI’AN J…	DIABETIC COMPLICATIONS; LIFE STYLE; SOCS2 VARIANTS; TYPE 2 DIABETES MELLITUS	10.2147/PGPM.S347018	ARTICLE	MESSENGER RNA; ADULT; AGE; ARTICLE; BODY MASS; CLINICAL FEATURE; CONTROLLED STUDY; DIABETIC COMPLICATION; DIABETIC NEPHROPATHY; DIABETIC RETINOPATHY; DRINKING BEHAVIOR; FEMALE; GENDER; GENE; GENE EXPRESSION; GENE LOCUS; GENETIC ASSOCIATION; GENETIC PREDISPOSITION; GENETIC VARIABILITY; GENOTYPE; HAN CHINESE; HUMAN; ISCHEMIC HEART DISEASE; MAJOR CLINICAL STUDY; MALE; MIDDLE AGED; NON INSULIN DEPEND…	PHARMACOECON PERSONALIZED MED	PHARMACOECON. PERSONALIZED MED.	ENGLISH	DOVE MEDICAL PRESS LTD	2022	C. WEI; DEPARTMENT OF GERIATRIC ENDOCRINOLOGY, THE FIRST AFFILIATED HOSPITAL OF XI’AN JIAOTONG UNIVERSITY, XI’AN, #277 WEST YANTA ROAD, SHAANXI, 710061, CHINA; EMAIL: DOCTORWEIWEI.CUI@126.COM; J. XU; DEPARTMENT OF GERIATRIC ENDOCRINOLOGY, THE FIRST AFFILIATED HOSPITAL OF XI’AN JIAOTONG UNIVERSITY, XI’AN, #277 WEST YANTA ROAD, SHAANXI, 710061, CHINA; EMAIL: 254309205@QQ.COM	11787066	PHARMACOGENOMICS AND PERSONALIZED MEDICINE	0	THE EFFECT OF SOCS2 POLYMORPHISMS ON TYPE 2 DIABETES MELLITUS SUSCEPTIBILITY AND DIABETIC COMPLICATIONS IN THE CHINESE HAN POPULATION	15	ISI	THE FIRST AFFILIATED HOSPITAL OF XI’AN JIAOTONG UNIVERSITY;XIANYANG CENTRAL HOSPITAL;THE FIRST AFFILIATED HOSPITAL OF XI’AN JIAOTONG UNIVERSITY	NOTREPORTED;THE FIRST AFFILIATED HOSPITAL OF XI’AN JIAOTONG UNIVERSITY;NOTREPORTED;NOTREPORTED;THE FIRST AFFILIATED HOSPITAL OF XI’AN JIAOTONG UNIVERSITY;NOTREPORTED		PAN J, 2022, PHARMACOECON PERSONALIZED MED	PAN J, 2022, PHARMACOECON PERSONALIZED MED
PANAHLOO A;ANDRÈS C;MOHAMED-ALI V;GOULD M;TALMUD P;HUMPHRIES S;YUDKIN J	none	BACKGROUND THE INSERTION/DELETION (ID) POLYMORPHISM OF THE ANGIOTENSIN- CONVERTING ENZYME (ACE) GENE HAS BEEN ASSOCIATED WITH INCREASED CORONARY HEART DISEASE (CHD), ALTHOUGH THE MECHANISM OF THIS ASSOCIATION IS NOT APPARENT. WE TESTED THE HYPOTHESIS THAT THE DELETION ALLELE OF THE ACE GENE IS ASSOCIATED WITH INSULIN RESISTANCE. METHODS AND RESULTS WE RELATED ACE GENOTYPE TO COMPONENTS OF THE INS…	DEPARTMENT OF MEDICINE, UNIV. COLLEGE LONDON MEDICAL SCHOOL, WHITTINGTON HOSPITAL, LONDON, ARCHWAY ROAD, UNITED KINGDOM; DEPARTMENT OF PRIMARY HEALTH CARE, UNIV. COLLEGE LONDON MEDICAL SCHOOL, WHITTINGTON HOSPITAL, LONDON, ARCHWAY ROAD, UNITED KINGDOM; DIVISION OF CARDIOVASCULAR GENETICS, DEPARTMENT OF MEDICINE, UNIV. COLLEGE LONDON MEDICAL SCHOOL, LONDON, UNIVERSITY STREET, UNITED KINGDOM; DEPAR…	ACE GENE; ANGIOTENSIN; INSULIN RESISTANCE; PLASMINOGEN ACTIVATOR INHIBITOR	10.1161/01.CIR.92.12.3390	ARTICLE	DIPEPTIDYL CARBOXYPEPTIDASE; ADULT; AGED; ALLELE; ARTICLE; DISEASE ASSOCIATION; DNA POLYMORPHISM; FEMALE; GENE INSERTION; GENOTYPE; HUMAN; INSULIN RESISTANCE; ISCHEMIC HEART DISEASE; MAJOR CLINICAL STUDY; MALE; NON INSULIN DEPENDENT DIABETES MELLITUS; PRIORITY JOURNAL	CIRCULATION	CIRCULATION	ENGLISH	LIPPINCOTT WILLIAMS AND WILKINS	1995		00097322	CIRCULATION	103	THE INSERTION ALLELE OF THE ACE GENE ID POLYMORPHISM A CANDIDATE GENE FOR INSULIN RESISTANCE	92	ISI	UNIV. COLLEGE LONDON MEDICAL SCHOOL;UNIV. COLLEGE LONDON MEDICAL SCHOOL;UNIV. COLLEGE LONDON MEDICAL SCHOOL;UNIV. COLLEGE LONDON MEDICAL SCHOOL	UNIV. COLLEGE LONDON MEDICAL SCHOOL;UNIV. COLLEGE LONDON MEDICAL SCHOOL;UNIV. COLLEGE LONDON MEDICAL SCHOOL;UNIV. COLLEGE LONDON MEDICAL SCHOOL		PANAHLOO A, 1995, CIRCULATION	PANAHLOO A, 1995, CIRCULATION
PETERS K;DAVIS W;BEILBY J;HUNG J;BRUCE D;DAVIS T	none	AIMS: TO INVESTIGATE THE RELATIONSHIP BETWEEN SERUM ADIPONECTIN, ADIPOQ VARIANTS AND HAPLOTYPES, AND CARDIOVASCULAR DISEASE (CVD) IN TYPE 2 DIABETES (T2D). METHODS: BASELINE DATA INCLUDING SERUM TOTAL ADIPONECTIN AND 21 ADIPOQ POLYMORPHISMS WERE AVAILABLE FOR 1076 PARTICIPANTS (MEAN AGE 64.0 YEARS, 49.4% MALES) IN A COMMUNITY-BASED COHORT FOLLOWED FOR AN AVERAGE OF 12 YEARS. RESULTS: DURING 8843 …	MEDICAL SCHOOL, UNIVERSITY OF WESTERN AUSTRALIA, CRAWLEY, WESTERN AUSTRALIA, AUSTRALIA; DEPARTMENT OF DIAGNOSTIC MOLECULAR GENOMICS, PATHWEST, QUEEN ELIZABETH II MEDICAL CENTRE, NEDLANDS, WESTERN AUSTRALIA, AUSTRALIA; SCHOOL OF BIOMEDICAL SCIENCES, UNIVERSITY OF WESTERN AUSTRALIA, CRAWLEY, WESTERN AUSTRALIA, AUSTRALIA	ADIPONECTIN; ADIPOQ; CARDIOVASCULAR DISEASE; CORONARY HEART DISEASE; ISCHAEMIC STROKE; TYPE 2 DIABETES	10.1016/j.diabres.2018.06.005	ARTICLE	ADIPONECTIN; CARDIOVASCULAR DISEASES; DIABETES MELLITUS; TYPE 2; FEMALE; HUMANS; MALE; MIDDLE AGED; RISK FACTORS; ADIPONECTIN; ADIPONECTIN; ADIPOQ PROTEIN; HUMAN; 3' UNTRANSLATED REGION; ADIPOQ GENE; ADOLESCENT; ADULT; ARTICLE; BRAIN ISCHEMIA; CARDIOVASCULAR DISEASE; CHILD; COHORT ANALYSIS; CONFIDENCE INTERVAL; CONTROLLED STUDY; DNA POLYMORPHISM; FEMALE; GENE; GENE LINKAGE DISEQUILIBRIUM; GENETIC…	DIABETES RES CLIN PRACT	DIABETES RES. CLIN. PRACT.	ENGLISH	ELSEVIER IRELAND LTD	2018	T.M.E. DAVIS; MEDICAL SCHOOL, UNIVERSITY OF WESTERN AUSTRALIA, FREMANTLE HOSPITAL, FREMANTLE, PO BOX 480, 6959, AUSTRALIA; EMAIL: TIM.DAVIS@UWA.EDU.AU	01688227	DIABETES RESEARCH AND CLINICAL PRACTICE	11	THE RELATIONSHIP BETWEEN CIRCULATING ADIPONECTIN ADIPOQ VARIANTS AND INCIDENT CARDIOVASCULAR DISEASE IN TYPE 2 DIABETES THE FREMANTLE DIABETES STUDY	143	ISI	UNIVERSITY OF WESTERN AUSTRALIA;QUEEN ELIZABETH II MEDICAL CENTRE;UNIVERSITY OF WESTERN AUSTRALIA	NOTREPORTED;UNIVERSITY OF WESTERN AUSTRALIA;NOTREPORTED		PETERS KE, 2018, DIABETES RES CLIN PRACT	PETERS KE, 2018, DIABETES RES CLIN PRACT
PETERS T;HOLMES M;RICHARDS J;PALMER T;FORGETTA V;LINDGREN C;ASSELBERGS F;NELSON C;SAMANI N;MCCARTHY M;MAHAJAN A;SMITH G;WOODWARD M;O'KEEFFE L;PETERS S	AHMAD OS, 2015, NAT COMMUN, V6, DOI 10.1038/NCOMMS8060;BATTY GD, 2020, BMJ-BRIT MED J, V368, DOI 10.1136/BMJ.M131;BOWDEN J, 2018, INT J EPIDEMIOL, V47, P1264, DOI 10.1093/IJE/DYY265, 10.1093/IJE/DYY101;BOWDEN J, 2016, GENET EPIDEMIOL, V40, P304, DOI 10.1002/GEPI.21965;BOWDEN J, 2015, INT J EPIDEMIOL, V44, P512, DOI 10.1093/IJE/DYV080;BURGESS S, 2017, EUR J EPIDEMIOL, V32, P377, DOI 10.1007/S10654…	OBJECTIVE OBSERVATIONAL STUDIES HAVE DEMONSTRATED THAT TYPE 2 DIABETES IS A STRONGER RISK FACTOR FOR CORONARY HEART DISEASE (CHD) IN WOMEN COMPARED WITH MEN. HOWEVER, IT IS NOT CLEAR WHETHER THIS REFLECTS A SEX DIFFERENTIAL IN THE CAUSAL EFFECT OF DIABETES ON CHD RISK OR RESULTS FROM SEX-SPECIFIC RESIDUAL CONFOUNDING. RESEARCH DESIGN AND METHODS USING 270 SINGLE NUCLEOTIDE POLYMORPHISMS (SNPS) FO…	LADY DAVIS INST MED RES, CTR CLIN EPIDEMIOL, MONTREAL, PQ, CANADA.; MCGILL UNIV, JEWISH GEN HOSP, DIV ENDOCRINOL, DEPT MED, MONTREAL, PQ, CANADA.; UNIV OXFORD, MED RES COUNCIL, POPULAT HLTH RES UNIT, OXFORD, ENGLAND.; UNIV OXFORD, NUFFIELD DEPT POPULAT HLTH, CLIN TRIAL SERV UNIT, OXFORD, ENGLAND.; UNIV OXFORD, NUFFIELD DEPT POPULAT HLTH, EPIDEMIOL STUDIES UNIT, OXFORD, ENGLAND.; OXFORD UNIV HOSP,…		10.2337/dc20-1137	ARTICLE	CARDIOVASCULAR-DISEASE; STANDARD ERRORS; INSTRUMENTS; WOMEN; IDENTIFICATION; BIAS; MEN	DIABETES CARE	DIABETES CARE	ENGLISH	AMER DIABETES ASSOC	2021	PETERS, TM (CORRESPONDING AUTHOR), LADY DAVIS INST MED RES, CTR CLIN EPIDEMIOL, MONTREAL, PQ, CANADA.; PETERS, TM (CORRESPONDING AUTHOR), MCGILL UNIV, JEWISH GEN HOSP, DIV ENDOCRINOL, DEPT MED, MONTREAL, PQ, CANADA.	0149-5992	DIABETES CARE	13	SEX DIFFERENCES IN THE RISK OF CORONARY HEART DISEASE ASSOCIATED WITH TYPE 2 DIABETES A MENDELIAN RANDOMIZATION ANALYSIS	44	ISI	MCGILL UNIVERSITY; LADY DAVIS INSTITUTE; MCGILL UNIVERSITY; UK RESEARCH AND INNOVATION (UKRI); MEDICAL RESEARCH COUNCIL UK (MRC); UNIVERSITY OF OXFORD; UNIVERSITY OF OXFORD; UNIVERSITY OF OXFORD; UNIVERSITY OF OXFORD; UNIVERSITY OF BRISTOL; UK RESEARCH AND INNOVATION (UKRI); MEDICAL RESEARCH COUNCIL UK (MRC); UNIVERSITY OF BRISTOL; UNIVERSITY OF OXFORD; UNIVERSITY OF OXFORD; WELLCOME CENTRE FOR H…	LADY DAVIS INST MED RES;MCGILL UNIV		PETERS TM, 2021, DIABETES CARE	PETERS TM, 2021, DIABETES CARE
PFISTER R;BARNES D;LUBEN R;KHAW K;WAREHAM N;LANGENBERG C	none	AIMS/HYPOTHESIS TYPE 2 DIABETES IS A MAJOR RISK FACTOR FOR CHD. WE HYPOTHESISED THAT DIABETES GENETIC SUSCEPTIBILITY VARIANTS MIGHT BE ASSOCIATED WITH INCREASED CHD RISK. METHODS WE EXAMINED THE INDIVIDUAL AND CUMULATIVE EFFECT OF 38 COMMON GENETIC VARIANTS PREVIOUSLY REPORTED TO BE ASSOCIATED WITH TYPE 2 DIABETES ON RISK OF INCIDENT CHD IN 20,467 PARTICIPANTS OF THE EUROPEAN PROSPECTIVE INVESTIG…	MRC EPIDEMIOLOGY UNIT, INSTITUTE OF METABOLIC SCIENCE, ADDENBROOKE'S HOSPITAL, CAMBRIDGE CB2 0QQ, HILLS ROAD, UNITED KINGDOM; DEPARTMENT III OF INTERNAL MEDICINE, HERZZENTRUM, UNIVERSITY OF COLOGNE, COLOGNE, GERMANY; DEPARTMENT OF PUBLIC HEALTH AND PRIMARY CARE, INSTITUTE OF PUBLIC HEALTH, UNIVERSITY OF CAMBRIDGE, CAMBRIDGE, UNITED KINGDOM	CORONARY HEART DISEASE; GENETIC SCORE; SINGLE NUCLEOTIDE POLYMORPHISM; TYPE 2 DIABETES	10.1007/s00125-011-2206-5	ARTICLE	ADULT; AGED; CARDIOVASCULAR DISEASES; CYCLIN-DEPENDENT KINASE INHIBITOR P15; CYCLIN-DEPENDENT KINASE INHIBITOR P16; DIABETES MELLITUS; TYPE 2; FEMALE; FOLLOW-UP STUDIES; GENETIC PREDISPOSITION TO DISEASE; GENETIC VARIATION; GREAT BRITAIN; HUMANS; INCIDENCE; LONGITUDINAL STUDIES; MALE; MIDDLE AGED; PROSPECTIVE STUDIES; RISK FACTORS; TETRASPANINS; ADULT; ALLELE; ARTICLE; CARDIOVASCULAR RISK; CDKN2A…	DIABETOLOGIA	DIABETOLOGIA	ENGLISH		2011	C. LANGENBERG; MRC EPIDEMIOLOGY UNIT, INSTITUTE OF METABOLIC SCIENCE, ADDENBROOKE'S HOSPITAL, CAMBRIDGE CB2 0QQ, HILLS ROAD, UNITED KINGDOM; EMAIL: CLAUDIA.LANGENBERG@MRC-EPID.CAM.AC.UK	14320428	DIABETOLOGIA	19	INDIVIDUAL AND CUMULATIVE EFFECT OF TYPE 2 DIABETES GENETIC SUSCEPTIBILITY VARIANTS ON RISK OF CORONARY HEART DISEASE	54	ISI	INSTITUTE OF METABOLIC SCIENCE;UNIVERSITY OF COLOGNE;UNIVERSITY OF CAMBRIDGE	NOTREPORTED;INSTITUTE OF METABOLIC SCIENCE;NOTREPORTED		PFISTER R, 2011, DIABETOLOGIA	PFISTER R, 2011, DIABETOLOGIA
PIPINO C;SHAH H;PRUDENTE S;DI P N;ZENG L;PARK K;TRISCHITTA V;PENNATHUR S;PANDOLFI A;DORIA A	none	A CHROMOSOME 1Q25 VARIANT (RS10911021) HAS BEEN ASSOCIATED WITH CORONARY HEART DISEASE (CHD) IN TYPE 2 DIABETES. IN HUMAN UMBILICAL VEIN ENDOTHELIAL CELLS (HUVECS), THE RISK ALLELE “C” IS ASSOCIATED WITH LOWER EXPRESSION OF THE ADJACENT GENE GLUL ENCODING GLUTAMINE SYNTHASE, CONVERTING GLUTAMIC ACID TO GLUTAMINE. TO FURTHER INVESTIGATE THE MECHANISMS THROUGH WHICH THIS LOCUS AFFECTS CHD RISK, WE …	RESEARCH DIVISION, JOSLIN DIABETES CENTER, BOSTON, MA, UNITED STATES; DEPARTMENT OF MEDICINE, HARVARD MEDICAL SCHOOL, BOSTON, MA, UNITED STATES; DEPARTMENT OF MEDICAL, ORAL AND BIOTECHNOLOGICAL SCIENCES, CENTER FOR ADVANCED STUDIES AND TECHNOLOGY-CAST (EX CESI-MET), UNIVERSITY G. D’ANNUNZIO OF CHIETIPESCARA, CHIETI, ITALY; RESEARCH UNIT OF METABOLIC AND CARDIOVASCULAR DISEASES, FONDAZIONE IRCCS C…		10.2337/db20-0475	ARTICLE	CHROMOSOMES; HUMAN; PAIR 1; CORONARY DISEASE; DIPEPTIDES; ENDOPHTHALMITIS; ENDOTHELIAL CELLS; GLUTAMATE-AMMONIA LIGASE; GLUTAMATES; GLUTAMINE; HUMAN UMBILICAL VEIN ENDOTHELIAL CELLS; HUMANS; PYRUVALDEHYDE; RNA; SMALL INTERFERING; AMINO ACID; BETA CITRYL GLUTAMATE; GAMMA GLUTAMYL AMINO ACID; GLUTAMATE AMMONIA LIGASE; GLUTAMIC ACID; GLUTAMINE; GLUTATHIONE; METHYLGLYOXAL; N ACETYLASPARTYLGLUTAMIC AC…	DIABETES	DIABETES	ENGLISH	AMERICAN DIABETES ASSOCIATION INC.	2020	A. DORIA; RESEARCH DIVISION, JOSLIN DIABETES CENTER, BOSTON, UNITED STATES; EMAIL: ALESSANDRO.DORIA@JOSLIN.HARVARD.EDU	00121797	DIABETES	10	ASSOCIATION OF THE 1Q25 DIABETESSPECIFIC CORONARY HEART DISEASE LOCUS WITH ALTERATIONS OF THE GLUTAMYL CYCLE AND INCREASED METHYLGLYOXAL LEVELS IN ENDOTHELIAL CELLS	69	ISI	JOSLIN DIABETES CENTER;HARVARD MEDICAL SCHOOL;UNIVERSITY G. D’ANNUNZIO OF CHIETIPESCARA;FONDAZIONE IRCCS CASA SOLLIEVO DELLA SOFFERENZA;UNIVERSITY OF MICHIGAN;FONDAZIONE IRCCS CASA SOLLIEVO DELLA SOFFERENZA;SAPIENZA UNIVERSITY	NOTREPORTED;JOSLIN DIABETES CENTER;NOTREPORTED		PIPINO C, 2020, DIABETES	PIPINO C, 2020, DIABETES
POLLEX R;HANLEY A;ZINMAN B;HARRIS S;KHAN H;HEGELE R	AL-DAGHRI N, 2003, DIABETIC MED, V20, P832, DOI 10.1046/J.1464-5491.2003.01044.X;BAIER LJ, 1995, J CLIN INVEST, V95, P1281, DOI 10.1172/JCI117778;BAIER LJ, 1996, J BIOL CHEM, V271, P10892, DOI 10.1074/JBC.271.18.10892;BONORA E, 2003, INT J OBESITY, V27, P1283, DOI 10.1038/SJ.IJO.0802381;CLEEMAN JI, 2001, JAMA-J AM MED ASSOC, V285, P2486, DOI 10.1001/JAMA.285.19.2486;COOK S, 2003, ARCH PEDIAT ADOL…	OBJECTIVES: THE PREVALENCE RATES OF TYPE 2 DIABETES (T2DM) AND CORONARY HEART DISEASE (CHD) IN ONTARIO OJI-CREE ARE AMONG THE WORLD'S HIGHEST. SINCE METABOLIC SYNDROME (METS) INCREASES RISK OF T2DM AND CHD, WE CHARACTERIZED PREVALENCE AND PUTATIVE GENETIC DETERMINANTS OF METS IN OJI-CREE. METHODS AND RESULTS: IN 515 ADULT (>= 18 YEARS OLD) AND 115 ADOLESCENT (< 18 YEARS OLD) OJI-CREE SUBJECTS. US…	ROBARTS RES INST, BLACKBURN CARDIOVASC GENET LAB, LONDON, ON, CANADA.; UNIV WESTERN ONTARIO, LONDON, ON, CANADA.; UNIV TORONTO, DEPT MED, TORONTO, ON M5G 1X5, CANADA.; MT SINAI HOSP, LEADERSHIP SINAI CTR DIABET, TORONTO, ON M5G 1X5, CANADA.; UNIV WESTERN ONTARIO, CTR STUDIES FAMILY MED, LONDON, ON, CANADA.; NEW JERSEY INST TECHNOL, DEPT MATH SCI, NEWARK, NJ 07102 USA.;	OBESITY; NORTH AMERICAN ABORIGINAL POPULATION; RISK FACTOR; EPIDEMIOLOGY; GENETICS	10.1016/j.atherosclerosis.2005.03.024	ARTICLE	ACID-BINDING PROTEIN; 3RD NATIONAL-HEALTH; RISK-FACTORS; BLOOD-PRESSURE; POPULATION; OBESITY; INSULIN; DISEASE; GLUCOSE; VARIANT	ATHEROSCLEROSIS	ATHEROSCLEROSIS	ENGLISH	ELSEVIER IRELAND LTD	2006	HEGELE, RA (CORRESPONDING AUTHOR), ROBARTS RES INST, BLACKBURN CARDIOVASC GENET LAB, LONDON, ON, CANADA.	0021-9150	ATHEROSCLEROSIS	62	METABOLIC SYNDROME IN ABORIGINAL CANADIANS PREVALENCE AND GENETIC ASSOCIATIONS	184	ISI	WESTERN UNIVERSITY (UNIVERSITY OF WESTERN ONTARIO); WESTERN UNIVERSITY (UNIVERSITY OF WESTERN ONTARIO); UNIVERSITY OF TORONTO; UNIVERSITY OF TORONTO; SINAI HEALTH SYSTEM TORONTO; LUNENFELD TANENBAUM RESEARCH INSTITUTE; WESTERN UNIVERSITY (UNIVERSITY OF WESTERN ONTARIO); NEW JERSEY INSTITUTE OF TECHNOLOGY	ROBARTS RES INST		POLLEX RL, 2006, ATHEROSCLEROSIS	POLLEX RL, 2006, ATHEROSCLEROSIS
PORCHAY-BALDÉRELLI I;PÉAN F;BELLILI N;JAZIRI R;MARRE M;FUMERON F	none	OBJECTIVE - TYPE 2 DIABETIC PATIENTS HAVE A HIGH RISK OF CORONARY HEART DISEASE (CHD) AND SUDDEN DEATH. THIS CARDIOVASCULAR RISK CAN BE PARTLY ATTRIBUTED TO LOW LEVELS OF HDL CHOLESTEROL. THE B2 ALLELE OF THE CETP TAQIB POLYMORPHISM HAS BEEN REPEATEDLY REPORTED TO BE ASSOCIATED WITH HIGH HDL CHOLESTEROL LEVELS IN BOTH HEALTHY AND TYPE 2 DIABETIC SUBJECTS, BUT ITS ASSOCIATION WITH CHD IS UNCLEAR. …	INSTITUT NATIONAL DE LA SANTÉ ET DE LA RECHERCHE MÉDICALE, U695, GENETIC DETERMINANTS FOR TYPE 2 DIABETES AND ITS VASCULAR COMPLICATIONS, PARIS, FRANCE; UNIVERSITY PARIS-DIDEROT, PARIS 7, PARIS, FRANCE; DEPARTMENT OF ENDOCRINOLOGY, DIABETOLOGY, NUTRITION AND METABOLIC DISEASES, ASSISTANCE PUBLIQUE-HÔPITAUX DE PARIS, XAVIER BICHAT HOSPITAL, PARIS, FRANCE; INSERM, U695, XAVIER BICHAT MEDICAL SCHOOL…		10.2337/dc07-0869	ARTICLE	CHOLESTEROL ESTER TRANSFER PROTEINS; CORONARY DISEASE; DEATH; SUDDEN; DEOXYRIBONUCLEASES; TYPE II SITE-SPECIFIC; DIABETES MELLITUS; TYPE 2; DIABETIC ANGIOPATHIES; FRANCE; GENOTYPE; HETEROZYGOTE DETECTION; HOMOZYGOTE; HUMANS; POLYMORPHISM; GENETIC; RISK ASSESSMENT; CHOLESTEROL ESTER TRANSFER PROTEIN; HIGH DENSITY LIPOPROTEIN CHOLESTEROL; PLACEBO; RAMIPRIL; AGED; ARTICLE; CARDIOVASCULAR RISK; CETP …	DIABETES CARE	DIABETES CARE	ENGLISH		2007	F. FUMERON; INSERM, U695, XAVIER BICHAT MEDICAL SCHOOL, 75870 PARIS CEDEX 18, 16 RUE HENRI HUCHARD, FRANCE; EMAIL: FUMERON@BICHAT.INSERM.FR	01495992	DIABETES CARE	14	THE CETP TAQIB POLYMORPHISM IS ASSOCIATED WITH THE RISK OF SUDDEN DEATH IN TYPE 2 DIABETIC PATIENTS	30	ISI	INSTITUT NATIONAL DE LA SANTÉ ET DE LA RECHERCHE MÉDICALE;UNIVERSITY PARIS-DIDEROT;XAVIER BICHAT HOSPITAL;FRANCE	NOTREPORTED;XAVIER BICHAT MEDICAL SCHOOL;NOTREPORTED		PORCHAY-BALDÉRELLI I, 2007, DIABETES CARE	PORCHAY-BALDÉRELLI I, 2007, DIABETES CARE
PORCHAY-BALDÉRELLI I;PÉAN F;EMERY N;MAIMAITIMING S;BELLILI N;TRAVERT F;MOHAMMEDI K;ROUSSEL R;MARRE M;FUMERON F	SALINAS CAA, 2007, CURR DIABETES REV, V3, P264, DOI 10.2174/157339907782329979;AIELLO RJ, 2002, ARTERIOSCL THROM VAS, V22, P630, DOI 10.1161/01.ATV.0000014804.35824.DA;BROOKS-WILSON A, 1999, NAT GENET, V22, P336, DOI 10.1038/11905;BRUNHAM LR, 2008, J CLIN INVEST, V118, P403, DOI 10.1172/JCI33296;CENARRO A, 2003, J MED GENET, V40, P163, DOI 10.1136/JMG.40.3.163;CLEE SM, 2001, CIRCULATION, V103, P1…	PATIENTS WITH TYPE 2 DIABETES MELLITUS (T2D) HAVE A HIGH CORONARY RISK PARTLY BECAUSE OF LOW LEVELS OF HIGH-DENSITY LIPOPROTEIN-CHOLESTEROL (HDL-C). THE ADENOSINE TRIPHOSPHATE-BINDING CASSETTE TRANSPORTER AL (ABCAL) PLAYS A KEY ROLE IN HDL METABOLISM. WE STUDIED THE ASSOCIATION OF COMMON SINGLE NUCLEOTIDE POLYMORPHISMS (SNPS) IN THE ABCAL GENE WITH HDL-C LEVELS AND CORONARY RISK IN A COHORT OF SU…	INSERM, U695, XAVIER BICHAT SCH MED, F-75018 PARIS, FRANCE.; UNIV PARIS 07, XAVIER BICHAT MED SCH, F-75018 PARIS, FRANCE.; HOP XAVIER BICHAT, ASSISTANCE PUBL HOP PARIS, DEPT ENDOCRINOL DIABETOL & NUTR, F-75018 PARIS, FRANCE.;		10.1016/j.metabol.2008.08.009	ARTICLE	STOCHASTIC-EM ALGORITHM; ABCA1 GENE; HDL CHOLESTEROL; ARTERY-DISEASE; ASSOCIATION ANALYSIS; A1; RISK; ATHEROSCLEROSIS; VARIANTS; HYPERLIPIDEMIA	METABOLISM	METAB.-CLIN. EXP.	ENGLISH	W B SAUNDERS CO-ELSEVIER INC	2009	FUMERON, F (CORRESPONDING AUTHOR), INSERM, U695, XAVIER BICHAT SCH MED, BP 416,16 RUE HENRI HUCHARD, F-75870 PARIS 18, FRANCE.	0026-0495	METABOLISM-CLINICAL AND EXPERIMENTAL	36	RELATIONSHIPS BETWEEN COMMON POLYMORPHISMS OF ADENOSINE TRIPHOSPHATEBINDING CASSETTE TRANSPORTER AL AND HIGHDENSITY LIPOPROTEIN CHOLESTEROL AND CORONARY HEART DISEASE IN A POPULATION WITH TYPE 2 DIABETES MELLITUS	58	ISI	UNIVERSITE PARIS CITE; INSTITUT NATIONAL DE LA SANTE ET DE LA RECHERCHE MEDICALE (INSERM); UNIVERSITE PARIS CITE; UNIVERSITE PARIS CITE; ASSISTANCE PUBLIQUE HOPITAUX PARIS (APHP); HOPITAL UNIVERSITAIRE BICHAT-CLAUDE BERNARD - APHP; AIX-MARSEILLE UNIVERSITE; ASSISTANCE PUBLIQUE-HOPITAUX DE MARSEILLE	XAVIER BICHAT SCH MED		PORCHAY-BALDÉRELLI I, 2009, METABOLISM	PORCHAY-BALDÉRELLI I, 2009, METABOLISM
POSADAS-SÁNCHEZ R;POSADAS-ROMERO C;OCAMPO-ARCOS W;VILLARREAL-MOLINA M;VARGAS-ALARCÓN G;ANTÚNEZ-ARGÜELLES E;MENDOZA-PÉREZ E;CARDOSO-SALDAÑA G;MARTÍNEZ-ALVARADO R;MEDINA-URRUTIA A;JORGE-GALARZA E	none	EPIDEMIOLOGICAL AND CLINICAL STUDIES HAVE SHOWN THAT A LOW PLASMA HIGH-DENSITY LIPOPROTEIN CHOLESTEROL (HDL-C) LEVEL IS A STRONG PREDICTOR OF CARDIOVASCULAR DISEASE (CVD). LECITHIN:CHOLESTEROL ACYLTRANSFERASE (LCAT) IS A KEY ENZYME IN THE FORMATION, MATURATION AND FUNCTION OF HDL. THEREFORE IMPAIRED LCAT FUNCTION MAY ENHANCE ATHEROSCLEROSIS BECAUSE OF DEFECTIVE CHOLESTEROL TRANSPORT. IN THIS STUD…	DEPARTMENT OF ENDOCRINOLOGY, NATIONAL INSTITUTE OF CARDIOLOGY IGNACIO CHÁVEZ (INCICH), TLALPAN, MEXICO CITY 14080, MEXICO; LABORATORY OF GENOMICS OF CARDIOVASCULAR DISEASE, NATIONAL INSTITUTE OF GENOMIC MEDICINE (INMEGEN), TLALPAN, MEXICO CITY 14610, MEXICO; DEPARTMENT OF MOLECULAR BIOLOGY, NATIONAL INSTITUTE OF CARDIOLOGY IGNACIO CHÁVEZ (INCICH), TLALPAN, MEXICO CITY 14080, MEXICO	CORONARY ARTERY CALCIUM; CORONARY HEART DISEASE; HIGH-DENSITY LIPOPROTEIN FUNCTION; LECITHIN CHOLESTEROL ACYLTRANSFERASE DEFICIENCY; LOW PLASMA HIGH-DENSITY LIPOPROTEIN CHOLESTEROL	10.3892/ijmm.2014.1733	ARTICLE	ADULT; CARDIOVASCULAR DISEASES; CHOLESTEROL; HDL; GENETIC PREDISPOSITION TO DISEASE; HUMANS; MALE; MUTATION; PHOSPHATIDYLCHOLINE-STEROL O-ACYLTRANSFERASE; HIGH DENSITY LIPOPROTEIN CHOLESTEROL; LOW DENSITY LIPOPROTEIN CHOLESTEROL; HIGH DENSITY LIPOPROTEIN CHOLESTEROL; PHOSPHATIDYLCHOLINE STEROL ACYLTRANSFERASE; ADULT; ARTICLE; CARDIOVASCULAR DISEASE; CAROTID ATHEROSCLEROSIS; CASE REPORT; CHOLESTER…	INT J MOL MED	INT. J. MOL. MED.	ENGLISH	SPANDIDOS PUBLICATIONS	2014	C. POSADAS-ROMERO; TLALPAN, MEXICO CITY 14080, JUAN BADIANO 1, COL, MEXICO; EMAIL: CPOSADASR@YAHOO.COM	11073756	INTERNATIONAL JOURNAL OF MOLECULAR MEDICINE	8	PREMATURE AND SEVERE CARDIOVASCULAR DISEASE IN A MEXICAN MALE WITH MARKEDLY LOW HIGHDENSITYLIPOPROTEINCHOLESTEROL LEVELS AND A MUTATION IN THE LECITHINCHOLESTEROL ACYLTRANSFERASE GENE A FAMILY STUDY	33	ISI	NATIONAL INSTITUTE OF CARDIOLOGY IGNACIO CHÁVEZ (INCICH);NATIONAL INSTITUTE OF GENOMIC MEDICINE (INMEGEN);NATIONAL INSTITUTE OF CARDIOLOGY IGNACIO CHÁVEZ (INCICH)	NOTREPORTED;NOTREPORTED;NOTREPORTED		POSADAS-SÁNCHEZ R, 2014, INT J MOL MED	POSADAS-SÁNCHEZ R, 2014, INT J MOL MED
PRUDENTE S;SHAH H;BAILETTI D;PEZZOLESI M;BURANASUPKAJORN P;MERCURI L;MENDONCA C;DE C S;NIEWCZAS M;TRISCHITTA V;DORIA A	none	SINGLE NUCLEOTIDE POLYMORPHISM (SNP) RS10911021 AT THE GLUTAMATE-AMMONIA LIGASE (GLUL) LOCUS HAS BEEN ASSOCIATED WITH AN INCREASED RISK OF CORONARY HEART DISEASE IN INDIVIDUALS WITH TYPE 2 DIABETES. THE EFFECT OF THIS SNP ON MORTALITY WAS INVESTIGATED AMONG 1,242 WHITE SUBJECTS WITH TYPE 2 DIABETES FROM THE JOSLIN KIDNEY STUDY (JKS) (N = 416) AND THE GARGANO MORTALITY STUDY (GMS) (N = 826). DURIN…	ISTITUTO DI RICOVERO E CURA A CARATTERE SCIENTIFICO, CASA SOLLIEVO DELLA SOFFERENZA, MENDEL LABORATORY, SAN GIOVANNI ROTONDO, ITALY; RESEARCH DIVISION, JOSLIN DIABETES CENTER, BOSTON, MA, UNITED STATES; DEPARTMENT OF MEDICINE, HARVARD MEDICAL SCHOOL, BOSTON, MA, UNITED STATES; DEPARTMENT OF EXPERIMENTAL MEDICINE, SAPIENZA UNIVERSITY, ROME, ITALY; ISTITUTO DI RICOVERO E CURA A CARATTERE SCIENTIFIC…		10.2337/db14-1653	ARTICLE	ADULT; AGED; CAUSE OF DEATH; DIABETES MELLITUS; TYPE 2; FEMALE; GLUTAMATE-AMMONIA LIGASE; HUMANS; MALE; MIDDLE AGED; POLYMORPHISM; SINGLE NUCLEOTIDE; GLUTAMATE AMMONIA LIGASE; GLUTAMATE AMMONIA LIGASE; ADULT; ALBUMINURIA; ARTICLE; CARDIOVASCULAR MORTALITY; CARDIOVASCULAR RISK; CAUSE OF DEATH; CHRONIC KIDNEY DISEASE; DIABETIC PATIENT; FEMALE; FOLLOW UP; GENE FREQUENCY; GENE LOCUS; GENETIC ASSOCIAT…	DIABETES	DIABETES	ENGLISH	AMERICAN DIABETES ASSOCIATION INC.	2015	A. DORIA; RESEARCH DIVISION, JOSLIN DIABETES CENTER, BOSTON, UNITED STATES; EMAIL: ALESSANDRO.DORIA@JOSLIN.HARVARD.EDU	00121797	DIABETES	19	GENETIC VARIANT AT THE GLUL LOCUS PREDICTS ALLCAUSE MORTALITY IN PATIENTS WITH TYPE 2 DIABETES	64	ISI	ISTITUTO DI RICOVERO E CURA A CARATTERE SCIENTIFICO;JOSLIN DIABETES CENTER;HARVARD MEDICAL SCHOOL;SAPIENZA UNIVERSITY;ISTITUTO DI RICOVERO E CURA A CARATTERE SCIENTIFICO;ISTITUTO DI RICOVERO E CURA A CARATTERE SCIENTIFICO	NOTREPORTED;JOSLIN DIABETES CENTER;NOTREPORTED		PRUDENTE S, 2015, DIABETES	PRUDENTE S, 2015, DIABETES
PUJIA A;GNASSO A;IRACE C;DOMINIJANNI A;ZINGONE A;PERROTTI N;COLONNA A;MATTIOLI P	none	THE ACE GENE HAS RECENTLY BEEN SHOWN TO BE ASSOCIATED WITH MYOCARDIAL INFARCTION, ESPECIALLY IN SUBJECTS CONSIDERED AT LOW RISK FOR CORONARY HEART DISEASE (CHD) ACCORDING TO COMMON CLASSIFICATION CRITERIA. THE POSSIBLE RELATIONSHIP BETWEEN DELETION POLYMORPHISM IN THIS GENE AND CHD RISK FACTORS, AS WELL AS ASYMPTOMATIC EXTRACORONARY ATHEROSCLEROSIS, HAS BEEN INVESTIGATED IN THE PRESENT STUDY. ONE…	DIPT MEDICINA SPERIMENTALE E CLINICA, 88100 CATANZARO, VIA T. CAMPANELLA, ITALY	ACE POLYMORPHISM; DIABETES; EXTRACORONARY ATHEROSCLEROSIS; HYPERTENSION		ARTICLE	ADULT; BASE SEQUENCE; DIABETES MELLITUS; NON-INSULIN-DEPENDENT; GENETIC MARKERS; HUMAN; HYPERTENSION; MALE; MIDDLE AGE; MOLECULAR SEQUENCE DATA; PEPTIDYL-DIPEPTIDASE A; POLYMORPHISM (GENETICS); DIPEPTIDYL CARBOXYPEPTIDASE; ADULT; ARTICLE; ATHEROSCLEROSIS; CAROTID ARTERY; CORONARY RISK; DOPPLER ECHOGRAPHY; GENE DELETION; GENE INSERTION; GENETIC POLYMORPHISM; HUMAN; HYPERTENSION; ISCHEMIC HEART DIS…	J HUM HYPERTENS	J. HUM. HYPERTENS.	ENGLISH		1994		09509240	JOURNAL OF HUMAN HYPERTENSION	23	ASSOCIATION BETWEEN ACEDD POLYMORPHISM AND HYPERTENSION IN TYPE II DIABETIC SUBJECTS	8	ISI	DIPT MEDICINA SPERIMENTALE E CLINICA	DIPT MEDICINA SPERIMENTALE E CLINICA		PUJIA A, 1994, J HUM HYPERTENS	PUJIA A, 1994, J HUM HYPERTENS
PULKKINEN A;KAREINEN A;SAARINEN L;HEIKKINEN S;LEHTO S;LAAKSO M	BERGMAN RN, 1985, ENDOCR REV, V6, P45, DOI 10.1210/EDRV-6-1-45;CLEMENT K, 1995, NEW ENGL J MED, V333, P352, DOI 10.1056/NEJM199508103330605;COBELLI C, 1987, AM J PHYSIOL, V252, PE679, DOI 10.1152/AJPENDO.1987.252.5.E679;DELACHAPELLE A, 1993, J MED GENET, V30, P857, DOI 10.1136/JMG.30.10.857;DESPRES JP, 1996, NEW ENGL J MED, V334, P952, DOI 10.1056/NEJM199604113341504;DUCIMETIERE P, 1980, DIABETOL…	HYPERINSULINEMIA HAS BEEN SHOWN TO PREDICT CORONARY HEART DISEASE (CHD) EVENTS IN BOTH NONDIABETIC SUBJECTS AND PATIENTS WITH NON-INSULIN-DEPENDENT DIABETES MELLITUS (NIDDM). THEREFORE, DEFECTS IN GENES THAT REGULATE INSULIN ACTION COULD BE RESPONSIBLE FOR AN INCREASED RISK OF CHD. THE TRP64ARG POLYMORPHISM OF THE BETA(3)-ADRENERGIC RECEPTOR GENE HAS BEEN LINKED WITH ABDOMINAL OBESITY, INSULIN RE…	UNIV KUOPIO, DEPT MED, SF-70210 KUOPIO, FINLAND.;		10.1016/S0026-0495(99)90218-4	ARTICLE	GLUCOSE-TOLERANCE; RISK FACTOR; TRP64ARG POLYMORPHISM; SENSITIVITY; WEIGHT; FINNS; ATHEROSCLEROSIS; MORTALITY; FEATURES; OBESITY	METABOLISM	METAB.-CLIN. EXP.	ENGLISH	W B SAUNDERS CO	1999	LAAKSO, M (CORRESPONDING AUTHOR), UNIV KUOPIO, DEPT MED, SF-70210 KUOPIO, FINLAND.	0026-0495	METABOLISM-CLINICAL AND EXPERIMENTAL	25	THE CODON 64 POLYMORPHISM OF THE SUB3SUBADRENERGIC RECEPTOR GENE IS NOT ASSOCIATED WITH CORONARY HEART DISEASE OR INSULIN RESISTANCE IN NONDIABETIC SUBJECTS AND NONINSULINDEPENDENT DIABETIC PATIENTS	48	ISI	UNIVERSITY OF EASTERN FINLAND	UNIV KUOPIO		PULKKINEN A, 1999, METABOLISM	PULKKINEN A, 1999, METABOLISM
PULKKINEN A;VIITANEN L;KAREINEN A;LEHTO S;LAAKSO M	none	OBJECTIVE - ELEVATED HDL CHOLESTEROL AND ITS PRINCIPAL CARRIER PROTEIN APOLIPOPROTEIN A1 [APO(AL)] ARE ASSOCIATED WITH REDUCED RISK OF CORONARY HEART DISEASE (CHD). NO STUDIES ARE AVAILABLE ON THE IMPACT OF THE -75-BP AND/OR +83-BP POLYMORPHISMS OF THE APO(AL) GENE ON HDL CHOLESTEROL AND APO(AL) LEVELS IN PATIENTS WITH TYPE 2 DIABETES. RESEARCH DESIGN AND METHODS - WE DETERMINED THE PREVALENCE OF…	DEPARTMENT OF MEDICINE, UNIVERSITY OF KUOPIO, KUOPIO, FINLAND; DEPARTMENT OF MEDICINE, UNIVERSITY OF KUOPIO, 70210 KUOPIO, FINLAND		10.2337/diacare.23.6.791	ARTICLE	APOLIPOPROTEIN A-I; APOLIPOPROTEINS B; BLOOD GLUCOSE; BLOOD PRESSURE; CHOLESTEROL; HDL; CORONARY DISEASE; DEOXYRIBONUCLEASE HPAII; DIABETES MELLITUS; TYPE 2; DIABETIC ANGIOPATHIES; FEMALE; GENOTYPE; HUMANS; INTRONS; MALE; MIDDLE AGED; POLYMORPHISM; RESTRICTION FRAGMENT LENGTH; REFERENCE VALUES; TRIGLYCERIDES; APOLIPOPROTEIN A1; HIGH DENSITY LIPOPROTEIN CHOLESTEROL; APOLIPOPROTEIN A1; APOLIPOPROTE…	DIABETES CARE	DIABETES CARE	ENGLISH	AMERICAN DIABETES ASSOCIATION INC.	2000	M. LAAKSO; DEPARTMENT OF MEDICINE, UNIVERSITY OF KUOPIO, 70210 KUOPIO, FINLAND; EMAIL: MARKKU.LAAKSO@KUH.FI	01495992	DIABETES CARE	27	MSPL POLYMORPHISM AT 83 BP IN INTRON 1 OF THE HUMAN APOLIPOPROTE IN A1 GENE IS ASSOCIATED WITH ELEVATED LEVELS OF HDL CHOLESTEROL AND APOLIPOPROTEIN A1 IN NONDIABETIC SUBJECTS BUT NOT IN TYPE 2 DIABETIC PATIENTS WITH CORONARY HEART DISEASE	23	ISI	UNIVERSITY OF KUOPIO;UNIVERSITY OF KUOPIO	NOTREPORTED;UNIVERSITY OF KUOPIO;NOTREPORTED		PULKKINEN A, 2000, DIABETES CARE	PULKKINEN A, 2000, DIABETES CARE
PULKKINEN A;VIITANEN L;KAREINEN A;LEHTO S;VAUHKONEN I;LAAKSO M	none	THE ENDOTHELIAL NITRIC OXIDE SYNTHASE (ENOS) GENE IS RESPONSIBLE FOR CONSTITUTIVE NITRIC OXIDE SYNTHESIS AND ARTERIAL VASODILATATION. RECENTLY TWO POLYMORPHISMS, THE 27-BP REPEAT SEQUENCE IN INTRON 4 AND THE GLU298ASP SUBSTITUTION IN EXON 7 OF THE ENOS GENE HAVE BEEN REPORTED TO BE RELATED TO CORONARY HEART DISEASE (CHD). WE SCREENED THESE POLYMORPHISMS OF THE ENOS GENE IN 308 UNRELATED NONDIABET…	DEPARTMENT OF MEDICINE, UNIVERSITY OF KUOPIO, 70210 KUOPIO, FINLAND	CORONARY HEART DISEASE; ENDOTHELIAL NITRIC OXIDE SYNTHASE GENE; HYPERTENSION; POLYMORPHISM; TYPE 2 DIABETES	10.1007/s001090000124	ARTICLE	ASPARAGINE; NITRIC OXIDE SYNTHASE; ADULT; AGED; ALLELISM; ARTICLE; CONTROLLED STUDY; ENZYME ISOLATION; FEMALE; GENE ISOLATION; GENETIC ASSOCIATION; GENETIC POLYMORPHISM; HUMAN; HUMAN CELL; HUMAN TISSUE; HYPERTENSION; INTRON; ISCHEMIC HEART DISEASE; MAJOR CLINICAL STUDY; MALE; NON INSULIN DEPENDENT DIABETES MELLITUS; VASODILATATION	J MOL MED	J. MOL. MED.	ENGLISH	SPRINGER VERLAG	2000	M. LAAKSO; DEPARTMENT OF MEDICINE, UNIVERSITY OF KUOPIO, 70210 KUOPIO, FINLAND; EMAIL: MARKKU.LAAKSO@KUH.FI	09462716	JOURNAL OF MOLECULAR MEDICINE	64	INTRON 4 POLYMORPHISM OF THE ENDOTHELIAL NITRIC OXIDE SYNTHASE GENE IS ASSOCIATED WITH ELEVATED BLOOD PRESSURE IN TYPE 2 DIABETIC PATIENTS WITH CORONARY HEART DISEASE	78	ISI	UNIVERSITY OF KUOPIO	NOTREPORTED;UNIVERSITY OF KUOPIO;NOTREPORTED		PULKKINEN A, 2000, J MOL MED	PULKKINEN A, 2000, J MOL MED
QI L;LI T;RIMM E;ZHANG C;RIFAI N;HUNTER D;DORIA A;HU F	none	RECENTLY, THE GENETIC VARIABILITY AT ADIPONECTIN LOCUS (APM1) WAS ASSOCIATED WITH CARDIOVASCULAR RISK IN PATIENTS WITH TYPE 2 DIABETES. WE SOUGHT TO EXAMINE THE ASSOCIATIONS OF FIVE VARIANTS OF APM1 GENE (C-11365G, A-4034C, A-3964G, T45G, AND G276T) WITH THE RISK OF CARDIOVASCULAR DISEASES (CVDS) IN A LARGER COHORT OF DIABETIC PATIENTS. OF 879 DIABETIC MEN FROM THE HEALTH PROFESSIONALS FOLLOW-UP …	DEPARTMENT OF NUTRITION, HARVARD SCHOOL OF PUBLIC HEALTH, BOSTON, MA, UNITED STATES; DEPARTMENT OF MEDICINE, BRIGHAM AND WOMEN'S HOSPITAL, HARVARD MEDICAL SCHOOL, BOSTON, MA, UNITED STATES; DEPARTMENT OF EPIDEMIOLOGY, HARVARD SCHOOL OF PUBLIC HEALTH, BOSTON, MA, UNITED STATES; DEPARTMENT OF LABORATORY MEDICINE, CHILDREN'S HOSP./HARVARD MED. SCH., BOSTON, MA, UNITED STATES; JOSLIN DIABETES CENTER,…		10.2337/diabetes.54.5.1607	ARTICLE	ADIPONECTIN; CARDIOVASCULAR DISEASES; COHORT STUDIES; DIABETIC ANGIOPATHIES; HUMANS; INTERCELLULAR SIGNALING PEPTIDES AND PROTEINS; MALE; POLYMORPHISM; SINGLE NUCLEOTIDE; RISK FACTORS; VARIATION (GENETICS); ACETYLSALICYLIC ACID; ADIPONECTIN; HEMOGLOBIN A1C; ADULT; AGE; AGED; ALCOHOL CONSUMPTION; ALLELE; APM1 GENE; ARTICLE; BODY MASS; CARDIOVASCULAR RISK; COHORT ANALYSIS; CONTROLLED STUDY; GENE; G…	DIABETES	DIABETES	ENGLISH		2005	L. QI; DEPARTMENT OF NUTRITION, HARVARD SCHOOL OF PUBLIC HEALTH, BOSTON, MA 02115, 665 HUNTINGTON AVE., UNITED STATES; EMAIL: NHLQI@CHANNING.HARVARD.EDU	00121797	DIABETES	122	THE 276 POLYMORPHISM OF THE APM1 GENE PLASMA ADIPONECTIN CONCENTRATION AND CARDIOVASCULAR RISK IN DIABETIC MEN	54	ISI	HARVARD SCHOOL OF PUBLIC HEALTH;HARVARD MEDICAL SCHOOL;HARVARD SCHOOL OF PUBLIC HEALTH;CHILDREN'S HOSP./HARVARD MED. SCH.;HARVARD MEDICAL SCHOOL;HARVARD SCHOOL OF PUBLIC HEALTH	NOTREPORTED;HARVARD SCHOOL OF PUBLIC HEALTH;NOTREPORTED		QI L, 2005, DIABETES	QI L, 2005, DIABETES
QI L;PARAST L;CAI T;POWERS C;GERVINO E;HAUSER T;HU F;DORIA A	BALDING DJ, 2006, NAT REV GENET, V7, P781, DOI 10.1038/NRG1916;BECKMAN JA, 2002, JAMA-J AM MED ASSOC, V287, P2570, DOI 10.1001/JAMA.287.19.2570;CAI TX, 2005, BIOMETRIKA, V92, P619, DOI 10.1093/BIOMET/92.3.619;COLDITZ GA, 1997, J WOMENS HEALTH, V6, P49, DOI 10.1089/JWH.1997.6.49;CORNELIS MC, 2009, ANN INTERN MED, V150, P541, DOI 10.7326/0003-4819-150-8-200904210-00008;COWIE CC, 2006, DIABETES CARE…	OBJECTIVES THE AIM OF THIS STUDY WAS TO EVALUATE WHETHER CORONARY HEART DISEASE (CHD)-SUSCEPTIBILITY LOCI IDENTIFIED BY GENOME-WIDE ASSOCIATION STUDIES OF THE GENERAL POPULATION ALSO CONTRIBUTE TO CHD IN TYPE 2 DIABETES. BACKGROUND NO STUDY HAS EXAMINED THE EFFECTS OF THESE GENETIC VARIANTS ON CHD IN DIABETIC PATIENTS. METHODS WE GENOTYPED 15 GENETIC MARKERS OF 12 LOCI IN 3 STUDIES OF DIABETIC PA…	HARVARD UNIV, SCH PUBL HLTH, DEPT NUTR, BOSTON, MA 02115 USA.; BRIGHAM & WOMENS HOSP, DEPT MED, CHANNING LAB, BOSTON, MA USA.; HARVARD UNIV, SCH PUBL HLTH, DEPT BIOSTAT, BOSTON, MA 02115 USA.; JOSLIN DIABET CTR, DIV RES, BOSTON, MA 02215 USA.; BETH ISRAEL DEACONESS MED CTR, DIV CARDIOVASC, BOSTON, MA 02215 USA.; HARVARD UNIV, SCH MED, DEPT MED, BOSTON, MA 02115 USA.;	CHD; DIABETES; GENETICS	10.1016/j.jacc.2011.08.054	ARTICLE	ARTERY-DISEASE; ASSOCIATION ANALYSIS; CARDIOVASCULAR RISK; PLASMA ADIPONECTIN; WOMEN; MELLITUS; LOCUS; MEN; CLASSIFICATION; POLYMORPHISM	J AM COLL CARDIOL	J. AM. COLL. CARDIOL.	ENGLISH	ELSEVIER SCIENCE INC	2011	QI, L (CORRESPONDING AUTHOR), HARVARD UNIV, SCH PUBL HLTH, DEPT NUTR, 665 HUNTINGTON AVE, BOSTON, MA 02115 USA.	0735-1097	JOURNAL OF THE AMERICAN COLLEGE OF CARDIOLOGY	68	GENETIC SUSCEPTIBILITY TO CORONARY HEART DISEASE IN TYPE 2 DIABETES 3 INDEPENDENT STUDIES	58	ISI	HARVARD UNIVERSITY; HARVARD T.H. CHAN SCHOOL OF PUBLIC HEALTH; HARVARD UNIVERSITY; BRIGHAM AND WOMEN'S HOSPITAL; HARVARD UNIVERSITY; HARVARD T.H. CHAN SCHOOL OF PUBLIC HEALTH; HARVARD UNIVERSITY; JOSLIN DIABETES CENTER, INC.; HARVARD UNIVERSITY; BETH ISRAEL DEACONESS MEDICAL CENTER; HARVARD UNIVERSITY; HARVARD MEDICAL SCHOOL	HARVARD UNIV		QI L, 2011, J AM COLL CARDIOL	QI L, 2011, J AM COLL CARDIOL
QI L;QI Q;PRUDENTE S;MENDONCA C;ANDREOZZI F;DI P N;STURMA M;NOVELLI V;MANNINO G;FORMOSO G;GERVINO E;HAUSER T;MUEHLSCHLEGEL J;NIEWCZAS M;KROLEWSKI A;BIOLO G;PANDOLFI A;RIMM E;SESTI G;TRISCHITTA V;HU F;DORIA A	ANONYMOUS, IDF DIAB;ASSIMES TL, 2010, J AM COLL CARDIOL, V56, P1552, DOI 10.1016/J.JACC.2010.06.022;AULCHENKO YS, 2010, BMC BIOINFORMATICS, V11, DOI 10.1186/1471-2105-11-134;BACCI S, 2005, DIABETES, V54, P3021, DOI 10.2337/DIABETES.54.10.3021;BIOLO G, 2008, AM J CLIN NUTR, V88, P950, DOI 10.1093/AJCN/88.4.950;CAROBBIO S, 2004, DIABETOLOGIA, V47, P266, DOI 10.1007/S00125-003-1306-2;CHENG SS, 2012,…	IMPORTANCE DIABETES IS ASSOCIATED WITH AN ELEVATED RISK OF CORONARY HEART DISEASE (CHD). PREVIOUS STUDIES HAVE SUGGESTED THAT THE GENETIC FACTORS PREDISPOSING TO EXCESS CARDIOVASCULAR RISK MAY BE DIFFERENT IN DIABETIC AND NONDIABETIC INDIVIDUALS. OBJECTIVE TO IDENTIFY GENETIC DETERMINANTS OF CHD THAT ARE SPECIFIC TO PATIENTS WITH DIABETES. DESIGN, SETTING, AND PARTICIPANTS WE STUDIED 5 INDEPENDEN…	HARVARD UNIV, SCH PUBL HLTH, DEPT NUTR, BOSTON, MA 02115 USA.; BRIGHAM & WOMENS HOSP, DEPT MED, CHANNING DIV NETWORK MED, BOSTON, MA 02115 USA.; HARVARD UNIV, SCH MED, BOSTON, MA 02115 USA.; IRCSS CASA SOLLIEVO SOFFERENZA MENDEL LAB, SAN GIOVANNI ROTONDO, ITALY.; JOSLIN DIABET CTR, DIV RES, BOSTON, MA 02215 USA.; MAGNA GRAECIA UNIV CATANZARO, DEPT MED & SURG SCI, CATANZARO, ITALY.; UNIV G DANNUNZ…		10.1001/jama.2013.276305	ARTICLE	GENOME-WIDE ASSOCIATION; GLUCAGON-LIKE PEPTIDE-1; ARTERY-DISEASE; MYOCARDIAL-INFARCTION; RISK; SUSCEPTIBILITY; METAANALYSIS; GLUTATHIONE; PREVENTION; LOCUS	JAMA-J AM MED ASSOC	JAMA-J. AM. MED. ASSOC.	ENGLISH	AMER MEDICAL ASSOC	2013	QI, L (CORRESPONDING AUTHOR), HARVARD UNIV, SCH PUBL HLTH, DEPT NUTR, 665 HUNTINGTON AVE, BOSTON, MA 02115 USA.	0098-7484	JAMA-JOURNAL OF THE AMERICAN MEDICAL ASSOCIATION	98	ASSOCIATION BETWEEN A GENETIC VARIANT RELATED TO GLUTAMIC ACID METABOLISM AND CORONARY HEART DISEASE IN INDIVIDUALS WITH TYPE 2 DIABETES	310	ISI	HARVARD UNIVERSITY; HARVARD T.H. CHAN SCHOOL OF PUBLIC HEALTH; HARVARD UNIVERSITY; BRIGHAM AND WOMEN'S HOSPITAL; HARVARD UNIVERSITY; HARVARD MEDICAL SCHOOL; IRCCS CASA SOLLIEVO DELLA SOFFERENZA; ISTITUTO CSS MENDEL; HARVARD UNIVERSITY; JOSLIN DIABETES CENTER, INC.; MAGNA GRAECIA UNIVERSITY OF CATANZARO; G D'ANNUNZIO UNIVERSITY OF CHIETI-PESCARA; UNIVERSITY OF TRIESTE; HARVARD UNIVERSITY; HARVARD …	HARVARD UNIV		QI L, 2013, JAMA-J AM MED ASSOC	QI L, 2013, JAMA-J AM MED ASSOC
QI Q;WORKALEMAHU T;ZHANG C;HU F;QI L	ABU-LEBDEH HS, 2001, MAYO CLIN PROC, V76, P707, DOI 10.4065/76.7.707;ALMDAL T, 2004, ARCH INTERN MED, V164, P1422, DOI 10.1001/ARCHINTE.164.13.1422;AULCHENKO YS, 2010, BMC BIOINFORMATICS, V11, DOI 10.1186/1471-2105-11-134;BECKMAN JA, 2002, JAMA-J AM MED ASSOC, V287, P2570, DOI 10.1001/JAMA.287.19.2570;BERGLUND L, 2004, ARTERIOSCL THROM VAS, V24, P2219, DOI 10.1161/01.ATV.0000144010.55563.63;CHASM…	AIMS TO EXAMINE THE RELATIONS BETWEEN GENETIC LOCI, PLASMA LIPOPROTEIN(A) [LP(A)] LEVELS, AND CARDIOVASCULAR DISEASE (CVD) RISK AMONG DIABETIC PATIENTS AND COMPARE WITH THE OBSERVATIONS IN THE GENERAL POPULATION. METHODS AND RESULTS IN TWO PROSPECTIVE COHORTS OF PATIENTS WITH TYPE 2 DIABETES (N = 2308) FROM THE NURSES' HEALTH STUDY AND THE HEALTH PROFESSIONAL FOLLOW-UP STUDY, WE PERFORMED (I) GEN…	HARVARD UNIV, SCH PUBL HLTH, DEPT NUTR, BOSTON, MA 02115 USA.; EUNICE KENNEDY SHRIVER NATL INST CHILD HLTH & DEV, EPIDEMIOL BRANCH, DIV EPIDEMIOL STAT & PREVENT RES, BETHESDA, MD USA.; HARVARD UNIV, SCH PUBL HLTH, DEPT EPIDEMIOL, BOSTON, MA 02115 USA.; BRIGHAM & WOMENS HOSP, DEPT MED, CHANNING LAB, BOSTON, MA 02115 USA.; HARVARD UNIV, SCH MED, BOSTON, MA 02115 USA.;	CARDIOVASCULAR DISEASE; GENOME-WIDE ASSOCIATION; LIPOPROTEIN(A); TYPE 2 DIABETES	10.1093/eurheartj/ehr350	ARTICLE	CORONARY-HEART-DISEASE; MIDDLE-AGED PATIENTS; ARTERY-DISEASE; ASSOCIATION ANALYSIS; LDL CHOLESTEROL; FOLLOW-UP; MELLITUS; WOMEN; INSULIN; STROKE	EUR HEART J	EUR. HEART J.	ENGLISH	OXFORD UNIV PRESS	2012	QI, L (CORRESPONDING AUTHOR), HARVARD UNIV, SCH PUBL HLTH, DEPT NUTR, 665 HUNTINGTON AVE, BOSTON, MA 02115 USA.	0195-668X	EUROPEAN HEART JOURNAL	69	GENETIC VARIANTS PLASMA LIPOPROTEINA LEVELS AND RISK OF CARDIOVASCULAR MORBIDITY AND MORTALITY AMONG TWO PROSPECTIVE COHORTS OF TYPE 2 DIABETES	33	ISI	HARVARD UNIVERSITY; HARVARD T.H. CHAN SCHOOL OF PUBLIC HEALTH; NATIONAL INSTITUTES OF HEALTH (NIH) - USA; NIH EUNICE KENNEDY SHRIVER NATIONAL INSTITUTE OF CHILD HEALTH AND HUMAN DEVELOPMENT (NICHD); HARVARD UNIVERSITY; HARVARD T.H. CHAN SCHOOL OF PUBLIC HEALTH; HARVARD UNIVERSITY; BRIGHAM AND WOMEN'S HOSPITAL; HARVARD UNIVERSITY; HARVARD MEDICAL SCHOOL	HARVARD UNIV		QI QB, 2012, EUR HEART J	QI QB, 2012, EUR HEART J
QIN J;TIAN J;LIU G;ZHANG Y;TIAN L;ZHEN Y;ZHANG H;XU J;SUN X;FANG T;NISHIYAMA K;KADOTA Y;SATO M;INOUE M;SUZUKI S	none	AIMS/INTRODUCTION: VARIANTS ON CHROMOSOME 1P13 HAVE BEEN ASSOCIATED WITH CORONARY ARTERY DISEASE AND ACUTE MYOCARDIAL INFARCTION RISK IN DIFFERENT ETHNIC GROUPS. THE PRESENT STUDY AIMED TO INVESTIGATE THE ASSOCIATION BETWEEN 1P13 POLYMORPHISMS AND THE DEVELOPMENT OF PERIPHERAL ARTERY DISEASE (PAD) IN A CHINESE POPULATION WITH TYPE 2 DIABETES MELLITUS. MATERIALS AND METHODS: 1P13 POLYMORPHISMS, RS…	DEPARTMENT OF INTERNAL MEDICINE, HEBEI MEDICAL UNIVERSITY, SHIJIAZHUANG, HEBEI, CHINA; SECOND DEPARTMENT OF ENDOCRINOLOGY, TANGSHAN GONGREN HOSPITAL, TANGSHAN, HEBEI, CHINA; DEPARTMENT OF ORTHOPEDICS, TANGSHAN GONGREN HOSPITAL, TANGSHAN, HEBEI, CHINA;FACULTY OF PHARMACEUTICAL SCIENCE, TOKUSHIMA BUNRI UNIVERSITY, TOKUSHIMA 770-8514, 180 YAMASHIRO-CHO, JAPAN	1P13; DIABETIC PERIPHERAL ARTERIAL DISEASE; SINGLE-NUCLEOTIDE POLYMORPHISM;ADIPOKINE; ADIPOSE TISSUE; CADMIUM; METALLOTHIONEIN	10.1111/jdi.12804 10.1016/j.taap.2013.07.015	ARTICLE ARTICLE	AGED; ASIAN CONTINENTAL ANCESTRY GROUP; CHROMOSOMES; HUMAN; PAIR 1; DIABETES MELLITUS; TYPE 2; FEMALE; GENETIC ASSOCIATION STUDIES; GENETIC PREDISPOSITION TO DISEASE; HUMANS; MALE; MIDDLE AGED; PERIPHERAL ARTERIAL DISEASE; POLYMORPHISM; SINGLE NUCLEOTIDE; HEMOGLOBIN A1C; LOW DENSITY LIPOPROTEIN CHOLESTEROL; TRIACYLGLYCEROL; ADULT; AGE; AGED; ARTICLE; BRAIN INFARCTION; CHINESE; CHROMOSOME 1P; CHRO…	J DIABETES INVEST TOXICOL APPL PHARMACOL	J. DIABETES INVEST. TOXICOL. APPL. PHARMACOL.	ENGLISH ENGLISH	BLACKWELL PUBLISHING	2018	H. FANG; DEPARTMENT OF INTERNAL MEDICINE, HEBEI MEDICAL UNIVERSITY, SHIJIAZHUANG, CHINA; EMAIL: FANGHUI2818@126.COM S. SUZUKI; FACULTY OF PHARMACEUTICAL SCIENCE, TOKUSHIMA BUNRI UNIVERSITY, TOKUSHIMA 770-8514, 180 YAMASHIRO-CHO, JAPAN; EMAIL: SUZUKIS@PH.BUNRI-U.AC.JP	20401116 10960333	JOURNAL OF DIABETES INVESTIGATION TOXICOLOGY AND APPLIED PHARMACOLOGY	6	ASSOCIATION BETWEEN 1P13 POLYMORPHISMS AND PERIPHERAL ARTERIAL DISEASE IN A CHINESE POPULATION WITH DIABETES CADMIUM MODULATES ADIPOCYTE FUNCTIONS IN METALLOTHIONEINNULL MICE	9 272	ISI	HEBEI MEDICAL UNIVERSITY;TANGSHAN GONGREN HOSPITAL;TANGSHAN GONGREN HOSPITAL;TOKUSHIMA BUNRI UNIVERSITY	NOTREPORTED;HEBEI MEDICAL UNIVERSITY;NOTREPORTED;TOKUSHIMA BUNRI UNIVERSITY;NOTREPORTED		QIN J, 2018, J DIABETES INVEST TOXICOL APPL PHARMACOL	QIN J, 2018, J DIABETES INVEST TOXICOL APPL PHARMACOL
RAO A;LINDHOLM D;RIVAS M;KNOWLES J;MONTGOMERY S;INGELSSON E	none	BACKGROUND: PCSK9 INHIBITION IS A POTENT NEW THERAPY FOR HYPERCHOLESTEROLEMIA AND CARDIOVASCULAR DISEASE. ALTHOUGH SHORT-TERM CLINICAL TRIAL RESULTS HAVE NOT DEMONSTRATED MAJOR ADVERSE EFFECTS, LONG-TERM DATA WILL NOT BE AVAILABLE FOR SOME TIME. GENETIC STUDIES IN LARGE BIOBANKS OFFER A UNIQUE OPPORTUNITY TO PREDICT DRUG EFFECTS AND PROVIDE CONTEXT FOR THE EVALUATION OF FUTURE CLINICAL TRIAL OUTC…	DEPARTMENT OF BIOENGINEERING (A.S.R.); STANFORD UNIVERSITY SCHOOL OF MEDICINE, CA. DIVISION OF CARDIOLOGY, DEPARTMENT OF MEDICAL SCIENCES (D.L.); UPPSALA UNIVERSITY, SWEDEN. UPPSALA CLINICAL RESEARCH CENTER, UPPSALA, SWEDEN; STANFORD UNIVERSITY, CA. DEPARTMENT OF BIOMEDICAL DATA SCIENCE (M.A.R.); DIVISION OF CARDIOLOGY, DEPARTMENT OF MEDICINE (J.W.K.; DEPARTMENT OF GENETICS (S.B.M.); DEPARTMENT O…	ATRIAL FIBRILLATION; DIABETES MELLITUS; TYPE 2; HEART FAILURE; HUMANS; STROKE	10.1161/CIRCGEN.118.002162	ARTICLE	AGED; AMINO ACID SUBSTITUTION; BRAIN ISCHEMIA; COHORT STUDIES; CORONARY DISEASE; FEMALE; GENOME-WIDE ASSOCIATION STUDY; HUMANS; HYPERCHOLESTEROLEMIA; MALE; MIDDLE AGED; MUTATION; MISSENSE; PROPROTEIN CONVERTASE 9; STROKE; PCSK9 PROTEIN; HUMAN; PROPROTEIN CONVERTASE 9; AGED; AMINO ACID SUBSTITUTION; BRAIN ISCHEMIA; CEREBROVASCULAR ACCIDENT; CLINICAL TRIAL; COHORT ANALYSIS; CORONARY ARTERY DISEASE;…	CIRC GENOM PRECIS MED	CIRC GENOM PRECIS MED	ENGLISH	NLM (MEDLINE)	2018		25748300	CIRCULATION. GENOMIC AND PRECISION MEDICINE	45	LARGESCALE PHENOMEWIDE ASSOCIATION STUDY OF PCSK9 VARIANTS DEMONSTRATES PROTECTION AGAINST ISCHEMIC STROKE	11	ISI	STANFORD UNIVERSITY SCHOOL OF MEDICINE;UPPSALA UNIVERSITY;STANFORD UNIVERSITY;STANFORD CARDIOVASCULAR INSTITUTE (E.I.)	NOTREPORTED;STANFORD UNIVERSITY SCHOOL OF MEDICINE;UPPSALA UNIVERSITY;STANFORD UNIVERSITY;NOTREPORTED;NOTREPORTED;NOTREPORTED;STANFORD CARDIOVASCULAR INSTITUTE (E.I.)		RAO AS, 2018, CIRC GENOM PRECIS MED	RAO AS, 2018, CIRC GENOM PRECIS MED
RASHAD N;EBRAHEM G;EL-SHAL A;ABO-ZENAR M;AHMED I;HAMED M	none	BACKGROUND: TYPE 2 DIABETES MELLITUS (T2DM) IS ONE OF THE WORLD'S MOST COMMON DISEASES WITH A HIGH PREVALENCE AND INCIDENCE. OBJECTIVE: TO INVESTIGATE THE ASSOCIATION OF APOA1 POLYMORPHISM (-75 G/A) WITH DYSLIPIDEMIA AND SUSCEPTIBILITY TO CAD AMONG EGYPTIAN PATIENTS WITH T2DM. PATIENTS AND METHODS: A TOTAL NUMBER OF 72 SUBJECTS WITH T2DM AND 72 AGE AND SEX MATCHED HEALTHY CONTROLS WERE ENROLLED F…	DEPARTMENTS OF INTERNAL MEDICINE, ZAGAZIG UNIVERSITY, ZAGAZIG, EGYPT; DEPARTMENTS OF MEDICAL BIOCHEMISTRY, ZAGAZIG UNIVERSITY, ZAGAZIG, EGYPT; CARDIOLOGY, FACULTY OF MEDICINE, ZAGAZIG UNIVERSITY, ZAGAZIG, EGYPT	APOLIPOPROTEIN A1; CORONARY ARTERY DISEASE; GENE POLYMORPHISM; T2DM	10.21608/EJHM.2021.143897	ARTICLE		EGYPT J HOSP MED	EGYPT. J. HOSP. MED.	ENGLISH	AIN SHAMS UNIVERSITY FACULTY OF MEDICINE	2021	M.G. HAMED; DEPARTMENTS OF INTERNAL MEDICINE, ZAGAZIG UNIVERSITY, ZAGAZIG, EGYPT; EMAIL: MOHAMED1GABER@GMAIL.COM	16872002	EGYPTIAN JOURNAL OF HOSPITAL MEDICINE	1	ASSOCIATION OF APOLIPOPROTEIN A1 GENE POLYMORPHISM AND CORONARY HEART DISEASES IN PATIENTS WITH TYPE 2 DIABETES MELLITUS	82	ISI	ZAGAZIG UNIVERSITY;ZAGAZIG UNIVERSITY;ZAGAZIG UNIVERSITY	NOTREPORTED;ZAGAZIG UNIVERSITY;NOTREPORTED		RASHAD NM, 2021, EGYPT J HOSP MED	RASHAD NM, 2021, EGYPT J HOSP MED
RELVAS W;IZAR M;HELFENSTEIN T;FONSECA M;COLOVATI M;OLIVEIRA A;IHARA S;HAN S;LAS C J A;FONSECA F	none	THIS STUDY WAS AIMED TO EXAMINE CHOLESTERYL ESTER TRANSFER PROTEIN (CETP), APOLIPOPROTEIN AI AND CIII GENE POLYMORPHISMS, AND TO VERIFY WHETHER THESE GENETIC DETERMINANTS ARE ASSOCIATED WITH THE PREVALENCE OF MYOCARDIAL INFARCTION (MI) OR TYPE 2 DIABETES. THE TAQIB RESTRICTION FRAGMENT LENGTH POLYMORPHISM (RFLP) IN INTRON I OF THE CETP GENE, THE MSPI IN THE THIRD INTRON OF THE APOAI GENE, AND ALS…	LIPIDES, ATEROSCLEROSE E BIOLOGIA VASCULAR, DISCIPLINA CARDIOL. - UNIV. FED. S., SÃO PAULO, BRAZIL	APOAI GENE; APOCIII GENE; CETP GENE; DIABETES; MYOCARDIAL INFARCTION; POLYMORPHISMS	10.1016/j.atherosclerosis.2004.05.025	ARTICLE	APOLIPOPROTEIN A-I; APOLIPOPROTEIN C-III; APOLIPOPROTEINS C; CARRIER PROTEINS; CASE-CONTROL STUDIES; CHOLESTEROL ESTER TRANSFER PROTEINS; DIABETES MELLITUS; TYPE 2; FEMALE; GENETIC PREDISPOSITION TO DISEASE; GLYCOPROTEINS; HUMANS; LIPIDS; LIPOPROTEINS; MALE; MIDDLE AGED; MYOCARDIAL INFARCTION; POLYMORPHISM; GENETIC; APOLIPOPROTEIN; CHOLESTEROL ESTER TRANSFER PROTEIN; 3' UNTRANSLATED REGION; ADULT…	ATHEROSCLEROSIS	ATHEROSCLEROSIS	ENGLISH		2005	F.A.H. FONSECA; LIPIDES, ATEROSCLEROSE E BIOLOGIA VASCULAR, DISCIPLINA CARDIOL. - UNIV. FED. S., SÃO PAULO, BRAZIL; EMAIL: LIPIDES.DMED@UNIFESP.EPM.BR	00219150	ATHEROSCLEROSIS	17	RELATIONSHIP BETWEEN GENE POLYMORPHISMS AND PREVALENCE OF MYOCARDIAL INFARCTION AMONG DIABETIC AND NONDIABETIC SUBJECTS	178	ISI	DISCIPLINA CARDIOL. - UNIV. FED. S.	NOTREPORTED;DISCIPLINA CARDIOL. - UNIV. FED. S.;NOTREPORTED		RELVAS WGM, 2005, ATHEROSCLEROSIS	RELVAS WGM, 2005, ATHEROSCLEROSIS
RESCHNER H;MILUTINOVIC A;PETROVIČ D	none	WE INVESTIGATED A POSSIBLE ASSOCIATION BETWEEN THE C373G (LEU125VAL) POLYMORPHISM IN THE PLATELET ENDOTHELIAL CELL ADHESION MOLECULE-1 (PECAM-1) AND MYOCARDIAL INFARCTION (MI) AMONG PATIENTS WITH TYPE 2 DIABETES (T2DM) IN THE SLOVENE POPULATION (CAUCASIANS). THE STUDY POPULATION OF THIS CROSS-SECTIONAL ANALYSIS CONSISTED OF 452 SUBJECTS WITH T2DM LASTING MORE THAN 10 YEARS: 142 PATIENTS WITH MI (…	HEALTH INSTITUTE RESCHNER, 1000 LJUBLJANA, SLOVENIA; INSTITUTE OF HISTOLOGY AND EMBRYOLOGY, MEDICAL FACULTY, UNIVERSITY OF LJUBLJANA, 1105 LJUBLJANA, SLOVENIA	MYOCARDIAL INFARCTION; PLATELET-ENDOTHELIAL CELL ADHESION MOLECULE-1 (PECAM-1) GENE POLYMORPHISM; TYPE 2 DIABETES	10.2478/s11535-009-0042-0	ARTICLE		CENT EUR J BIOL	CENT. EUR. J. BIOL.	ENGLISH		2009	D. PETROVIČ; INSTITUTE OF HISTOLOGY AND EMBRYOLOGY, MEDICAL FACULTY, UNIVERSITY OF LJUBLJANA, 1105 LJUBLJANA, SLOVENIA; EMAIL: DANIEL.PETROVIC@MF.UNI-LJ.SI	16443632	CENTRAL EUROPEAN JOURNAL OF BIOLOGY	8	THE PECAM1 GENE POLYMORPHISM A GENETIC MARKER OF MYOCARDIAL INFARCTION	4	ISI	HEALTH INSTITUTE RESCHNER;UNIVERSITY OF LJUBLJANA	NOTREPORTED;UNIVERSITY OF LJUBLJANA;NOTREPORTED		RESCHNER H, 2009, CENT EUR J BIOL	RESCHNER H, 2009, CENT EUR J BIOL
RICHARDS J;WATERWORTH D;O'RAHILLY S;HIVERT M;LOOS R;PERRY J;TANAKA T;TIMPSON N;SEMPLE R;SORANZO N;SONG K;ROCHA N;GRUNDBERG E;DUPUIS J;FLOREZ J;LANGENBERG C;PROKOPENKO I;SAXENA R;SLADEK R;AULCHENKO Y;EVANS D;WAEBER G;ERDMANN J;BURNETT M;SATTAR N;DEVANEY J;WILLENBORG C;HINGORANI A;WITTEMAN J;VOLLENWEIDER P;GLASER B;HENGSTENBERG C;FERRUCCI L;MELZER D;STARK K;DEANFIELD J;WINOGRADOW J;GRASSL M;HALL A;…	ABECASIS GR, 2002, NAT GENET, V30, P97, DOI 10.1038/NG786;ANDREW T, 2001, TWIN RES, V4, P464, DOI 10.1375/TWIN.4.6.464;BASU R, 2007, DIABETES, V56, P2174, DOI 10.2337/DB07-0185;BLÜHER M, 2002, DEV CELL, V3, P25, DOI 10.1016/S1534-5807(02)00199-5;BLÜMER RME, 2008, AM J PHYSIOL-ENDOC M, V295, PE613, DOI 10.1152/AJPENDO.90288.2008;BRAME LA, 2005, OBES RES, V13, P582, DOI 10.1038/OBY.2005.62;BURTON P…	THE ADIPOCYTE-DERIVED PROTEIN ADIPONECTIN IS HIGHLY HERITABLE AND INVERSELY ASSOCIATED WITH RISK OF TYPE 2 DIABETES MELLITUS (T2D) AND CORONARY HEART DISEASE (CHD). WE META-ANALYZED 3 GENOME-WIDE ASSOCIATION STUDIES FOR CIRCULATING ADIPONECTIN LEVELS (N = 8,531) AND SOUGHT VALIDATION OF THE LEAD SINGLE NUCLEOTIDE POLYMORPHISMS ( SNPS) IN 5 ADDITIONAL COHORTS (N = 6,202). FIVE SNPS WERE GENOME-WID…	MCGILL UNIV, JEWISH GEN HOSP, DEPT MED, MONTREAL, PQ H3T 1E2, CANADA.; MCGILL UNIV, JEWISH GEN HOSP, DEPT HUMAN GENET, MONTREAL, PQ H3T 1E2, CANADA.; MCGILL UNIV, JEWISH GEN HOSP, DEPT EPIDEMIOL & BIOSTAT, MONTREAL, PQ H3T 1E2, CANADA.; KINGS COLL LONDON, LONDON WC2R 2LS, ENGLAND.; GLAXOSMITHKLINE, DIV GENET, KING OF PRUSSIA, PA USA.; UNIV CAMBRIDGE, ADDENBROOKES HOSP, INST METAB SCI, METAB RES L…		10.1371/journal.pgen.1000768	ARTICLE	MOLECULAR-WEIGHT ADIPONECTIN; BONE-MINERAL DENSITY; SMALL G-PROTEINS; INSULIN-RESISTANCE; PLASMA ADIPONECTIN; CIRCULATING ADIPONECTIN; SERUM CONCENTRATION; RISK; GENE; OBESITY	PLOS GENET	PLOS GENET.	ENGLISH	PUBLIC LIBRARY SCIENCE	2009	RICHARDS, JB (CORRESPONDING AUTHOR), MCGILL UNIV, JEWISH GEN HOSP, DEPT MED, MONTREAL, PQ H3T 1E2, CANADA.	1553-7404	PLOS GENETICS	140	A GENOMEWIDE ASSOCIATION STUDY REVEALS VARIANTS IN IARL15I THAT INFLUENCE ADIPONECTIN LEVELS	5	ISI	MCGILL UNIVERSITY; MCGILL UNIVERSITY; MCGILL UNIVERSITY; UNIVERSITY OF LONDON; KING'S COLLEGE LONDON; GLAXOSMITHKLINE; CAMBRIDGE UNIVERSITY HOSPITALS NHS FOUNDATION TRUST; ADDENBROOKE'S HOSPITAL; UNIVERSITY OF CAMBRIDGE; HARVARD UNIVERSITY; MASSACHUSETTS GENERAL HOSPITAL; HARVARD UNIVERSITY; HARVARD MEDICAL SCHOOL; CAMBRIDGE UNIVERSITY HOSPITALS NHS FOUNDATION TRUST; ADDENBROOKE'S HOSPITAL; UNIVE…	MCGILL UNIV		RICHARDS JB, 2009, PLOS GENET	RICHARDS JB, 2009, PLOS GENET
RIGOLI L;CUCINOTTA D;COCOZZA S;DI B A;MONTICELLI A;ROMANO G;FERRARA A;PIANESE L;RAIMONDO G;SQUADRITO G;RICCARDI G	none	THE AIM OF THE STUDY WAS TO VERIFY WHETHER THE INCREASED PREVALENCE OF CORONARY HEART DISEASE, COMMONLY OBSERVED IN NON-INSULIN DEPENDENT DIABETES MELLITUS (NIDDM), MAY BE RELATED TO A GENETIC BACKGROUND INVOLVING SOME RESTRICTION FRAGMENTS LENGTH POLYMORPHISMS OF APOLIPOPROTEIN GENES. ON THE BASIS OF A CASE-CONTROL STUDY, WE SELECTED 56 NIDDM PATIENTS WITH CORONARY HEART DISEASE AND 56 DIABETIC …	DIPARTIMENTO DI MEDICINA INTERNA, POLICLINICO UNIVERSITARIO, I-98100 MESSINA, ITALY	APOLIPOPROTEIN GENES; CORONARY HEART DISEASE; NON-INSULIN DEPENDENT DIABETES MELLITUS; RESTRICTION FRAGMENTS LENGTH POLIMORPHISMS		ARTICLE	APOLIPOPROTEIN A1; APOLIPOPROTEIN B; APOLIPOPROTEIN C3; CHOLESTEROL; INSULIN; LIPID; TRIACYLGLYCEROL; ADULT; ALLELE; ARTICLE; CHOLESTEROL BLOOD LEVEL; CONTROLLED STUDY; FEMALE; GENE AMPLIFICATION; GENE CLUSTER; GENE FREQUENCY; GENETIC POLYMORPHISM; GENOTYPE; HUMAN; ISCHEMIC HEART DISEASE; LIPID BLOOD LEVEL; MAJOR CLINICAL STUDY; MALE; NON INSULIN DEPENDENT DIABETES MELLITUS; PREVALENCE; PRIORITY …	DIABETES NUTR METAB CLIN EXP	DIABETES NUTR. METAB. CLIN. EXP.	ENGLISH		1994		03943402	DIABETES, NUTRITION AND METABOLISM - CLINICAL AND EXPERIMENTAL	3	A GENETIC POLYMORPHISM OF THE APOLIPOPROTEIN AICIII GENE CLUSTER IS ASSOCIATED WITH CORONARY HEART DISEASE IN NONINSULIN DEPENDENT DIABETES MELLITUS	7	ISI	POLICLINICO UNIVERSITARIO	POLICLINICO UNIVERSITARIO		RIGOLI L, 1994, DIABETES NUTR METAB CLIN EXP	RIGOLI L, 1994, DIABETES NUTR METAB CLIN EXP
RIGOLI L;RAIMONDO G;DI B A;ROMANO G;PORCELLINI A;CAMPO S;CORICA F;RICCARDI G;SQUADRITO G;CUCINOTTA D	none	THE AIM OF THIS STUDY WAS TO VERIFY WHETHER OR NOT THE INCREASED PREVALENCE OF CORONARY HEART DISEASE (CHD) COMMONLY OBSERVED IN PATIENTS WITH TYPE 2 DIABETES MELLITUS IS RELATED TO A GENETIC BACKGROUND INVOLVING RESTRICTION FRAGMENT LENGTH POLYMORPHISMS (RFLPS) OF APOLIPOPROTEINS. ON THE BASIS OF A CASE-CONTROL DESIGN, 62 TYPE 2 DIABETIC PATIENTS WITH CHD (CONFIRMED BY CLINICAL HISTORY AND ELECT…	DEPARTMENT OF INTERNAL MEDICINE, UNIVERSITY OF MESSINA, MESSINA, I-98100, ITALY; DEPARTMENT OF CELLULAR AND MOLECULAR BIOLOGY, UNIVERSITY OF NAPLES, NAPLES, ITALY; INSTITUTE OF INTERNAL MEDICINE AND METABOLIC DISEASES, UNIVERSITY OF NAPLES, NAPLES, ITALY	APOLIPOPROTEIN GENE; CORONARY HEART DISEASE; NON-INSULIN-DEPENDENT DIABETES MELLITUS; RESTRICTION FRAGMENT LENGTH POLYMORPHISM	10.1007/BF00576258	ARTICLE	ALLELES; APOLIPOPROTEIN A-I; APOLIPOPROTEIN C-III; APOLIPOPROTEINS A; APOLIPOPROTEINS B; APOLIPOPROTEINS C; BASE SEQUENCE; CASE-CONTROL STUDIES; CHOLESTEROL; CHOLESTEROL; HDL; CHOLESTEROL; LDL; CORONARY DISEASE; DIABETES MELLITUS; TYPE 2; DNA PRIMERS; FEMALE; GENE FREQUENCY; GENETIC MARKERS; GENOTYPE; HUMANS; MALE; MIDDLE AGED; MOLECULAR SEQUENCE DATA; POLYMERASE CHAIN REACTION; POLYMORPHISM; RES…	ACTA DIABETOL	ACTA DIABETOL	ENGLISH	SPRINGER-VERLAG	1995		14325233	ACTA DIABETOLOGICA	13	APOLIPOPROTEIN AICIIIAIV GENETIC POLYMORPHISMS AND CORONARY HEART DISEASE IN TYPE 2 DIABETES MELLITUS	32	ISI	UNIVERSITY OF MESSINA;UNIVERSITY OF NAPLES;UNIVERSITY OF NAPLES	UNIVERSITY OF MESSINA;UNIVERSITY OF NAPLES;UNIVERSITY OF NAPLES		RIGOLI L, 1995, ACTA DIABETOL	RIGOLI L, 1995, ACTA DIABETOL
RUIZ J;BLANCHÉ H;COHEN N;VELHO G;CAMBIEN F;COHEN D;PASSA P;FROGUEL P	none	NON-INSULIN-DEPENDENT DIABETES MELLITUS (NIDDM) IS CONSIDERED A MODEL OF PREMATURE ATHEROSCLEROSIS WITH A STRONG GENETIC COMPONENT. WE HAVE INVESTIGATED THE ROLE OF ANGIOTENSIN-CONVERTING ENZYME (ACE; EC 3.4.15.1) GENE IN 316 UNRELATED NIDDM INDIVIDUALS, 132 WHO HAD MYOCARDIAL INFARCTION OR SIGNIFICANT CORONARY STENOSES AND 184 WITH NO HISTORY OF CORONARY HEART DISEASE (CHD). A DELETION-POLYMORPH…	CTR. D'ETUDE DU POLYMORPHISME HUMAIN, FONDATION JEAN DAUSSET-CEPH, 75010 PARIS, FRANCE; DÉPARTEMENT D'ENDOCRINOLOGIE, HOPITAL SAINT-LOUIS, 75010 PARIS, FRANCE; INST. NATL. S. DE LA RECH. MED. U358, 75010 PARIS, FRANCE; INST. NATL. S. DE LA RECH. MED. SC7, 75005 PARIS, FRANCE; CTR. D'ETUDE DU POLYMORPHISME HUMAIN, 75010 PARIS, 27 RUE JULIETTE DODU, FRANCE		10.1073/pnas.91.9.3662	ARTICLE	DIPEPTIDYL CARBOXYPEPTIDASE; ALLELE; ARTICLE; ATHEROSCLEROSIS; CONTROLLED STUDY; CORONARY ARTERY OBSTRUCTION; DELETION MUTANT; DNA POLYMORPHISM; EARLY DIAGNOSIS; GENE DELETION; GENE INSERTION; GENETIC SUSCEPTIBILITY; GENOTYPE; HEART INFARCTION; HUMAN; HUMAN CELL; ISCHEMIC HEART DISEASE; NON INSULIN DEPENDENT DIABETES MELLITUS; PRIORITY JOURNAL	PROC NATL ACAD SCI U S A	PROC. NATL. ACAD. SCI. U. S. A.	ENGLISH	NATIONAL ACADEMY OF SCIENCES	1994		00278424	PROCEEDINGS OF THE NATIONAL ACADEMY OF SCIENCES OF THE UNITED STATES OF AMERICA	251	INSERTIONDELETION POLYMORPHISM OF THE ANGIOTENSINCONVERTING ENZYME GENE IS STRONGLY ASSOCIATED WITH CORONARY HEART DISEASE IN NONINSULINDEPENDENT DIABETES MELLITUS	91	ISI	CTR. D'ETUDE DU POLYMORPHISME HUMAIN;CTR. D'ETUDE DU POLYMORPHISME HUMAIN	CTR. D'ETUDE DU POLYMORPHISME HUMAIN;NOTREPORTED;NOTDECLARED;NOTDECLARED;CTR. D'ETUDE DU POLYMORPHISME HUMAIN		RUIZ J, 1994, PROC NATL ACAD SCI U S A	RUIZ J, 1994, PROC NATL ACAD SCI U S A
RUIZ J;MORABIA A;BLANCHE H;JAMES R;GARIN M;CHARPENTIER G;PASSA P;VAISSE C;RUIZ J;FROGUEL P	none	SUMMARY. PARAOXONASE IS A HIGH-DENSITY-LIPOPROTEIN-ASSOCIATED ENZYME CAPABLE OF HYDROLYSING LIPID PEROXIDES. THUS IT MIGHT PROTECT LIPOPROTEINS FROM OXIDATION. IT HAS TWO ISOFORMS, WHICH ARISE FROM A GLUTAMINE (A ISOFORM) TO ARGININE (B ISOFORM) INTERCHANGE AT POSITION 192. THE RELEVANCE OF THIS POLYMORPHISM TO CORONARY HEART DISEASE (CHD) IN NON-INSULIN-DEPENDENT DIABETIC PATIENTS WAS INVESTIGAT…	DIVISION D'EPIDÉMIOLOGIE CLINIQUE, GENEVA UNIVERSITY HOSPITAL, SWITZERLAND; FRANCE; DIVISION D'ENDOCRINOLOGIE ET DIABÉTOLOGIE, GENEVA UNIVERSITY HOSPITAL, SWITZERLAND; HÔPITAL DE CORBEIL, CORBEIL, FRANCE; SERVICE DE DIABÉTOLOGIE, SAINT-LOUIS HOSPITAL, PARIS, FRANCE; CNRS EP 10, INSTITUT PASTEUR DE LILLE, FRANCE		10.1016/S0140-6736(95)92709-3	ARTICLE	ARGININE; ARYLESTERASE; GLUTAMINE; HIGH DENSITY LIPOPROTEIN; LIPID PEROXIDE; LIPOPROTEIN; ADULT; AGED; ALLELE; AMINO ACID SUBSTITUTION; ARTICLE; ATHEROGENESIS; CONTROLLED STUDY; CORONARY ARTERY DISEASE; DNA POLYMORPHISM; ENZYME ACTIVITY; FEMALE; GENOTYPE; HETEROZYGOTE; HOMOZYGOTE; HUMAN; HUMAN CELL; HYDROLYSIS; ISCHEMIC HEART DISEASE; MAJOR CLINICAL STUDY; MALE; MULTIVARIATE ANALYSIS; NON INSULIN…	LANCET	LANCET	ENGLISH		1995		01406736	THE LANCET	354	GLNARG192 POLYMORPHISM OF PARAOXONASE AND CORONARY HEART DISEASE IN TYPE 2 DIABETES	346	ISI	GENEVA UNIVERSITY HOSPITAL;GENEVA UNIVERSITY HOSPITAL;SAINT-LOUIS HOSPITAL;FRANCE	GENEVA UNIVERSITY HOSPITAL;NOTREPORTED;GENEVA UNIVERSITY HOSPITAL;NOTREPORTED;SAINT-LOUIS HOSPITAL;INSTITUT PASTEUR DE LILLE		RUIZ J, 1995, LANCET	RUIZ J, 1995, LANCET
RYAN A;NICKLAS B;BERMAN D;FERRELL R	none	OBJECTIVE - THE ACE INSERTION/DELETION (I/D) POLYMORPHISM HAS BEEN IDENTIFIED AS A GENETIC RISK FACTOR FOR CORONARY HEART DISEASE (CHD). THE DELETION (D) ALLELE OF THE ACE GENE MAY BE ASSOCIATED WITH HIGHER INSULIN SENSITIVITY. INDIVIDUALS WHO ARE HOMOZYGOUS FOR THE DD ALLELE HAVE HIGHER ACE LEVELS AND POSSIBLY MORE ANGIOTENSIN II, WHICH, WHEN INFUSED EXOGENOUSLY, CAUSES AN INCREASE IN INSULIN SE…	DEPARTMENT OF MEDICINE, DIVISION OF GERONTOLOGY, UNIV. OF MARYLAND SCHOOL OF MEDICINE, BALTIMORE, MD, UNITED STATES; BALTIMORE GERIATRIC RESEARCH, EDUCATION AND CLINICAL CENTER, VETERAN'S AFF. MARYLAND HLTH. C.S., BALTIMORE, MD, UNITED STATES; DEPARTMEM OF HUMAN GENETICS, UNIVERSITY OF PITTSBURGH, PITTSBURGH, PA, UNITED STATES; DIVISION OF GERONTOLOGY, GRECC (18), BALTIMORE VET. AFF. MEDICAL CENT…		10.2337/diacare.24.9.1646	ARTICLE	ADIPOSE TISSUE; ADULT; ALLELES; BLOOD GLUCOSE; BLOOD PRESSURE; BODY COMPOSITION; BODY CONSTITUTION; BODY WEIGHT; CALORIMETRY; INDIRECT; CORONARY DISEASE; DENSITOMETRY; X-RAY; DNA TRANSPOSABLE ELEMENTS; FEMALE; GENOTYPE; GLUCOSE CLAMP TECHNIQUE; HOMOZYGOTE; HUMANS; INSULIN; LIPIDS; OBESITY; PEPTIDYL-DIPEPTIDASE A; POLYMORPHISM; GENETIC; REFERENCE VALUES; REGRESSION ANALYSIS; RISK FACTORS; SEQUENCE…	DIABETES CARE	DIABETES CARE	ENGLISH	AMERICAN DIABETES ASSOCIATION INC.	2001	A.S. RYAN; DIVISION OF GERONTOLOGY, GRECC (18), BALTIMORE VET. AFF. MEDICAL CENTER, BALTIMORE, MD 21201, UNITED STATES; EMAIL: ARYAN@GRECC.UMARYLAND.EDU	01495992	DIABETES CARE	44	THE INSERTIONDELETION POLYMORPHISM OF THE ACE GENE IS RELATED TO INSULIN SENSITIVITY IN OVERWEIGHT WOMEN	24	ISI	UNIV. OF MARYLAND SCHOOL OF MEDICINE;EDUCATION AND CLINICAL CENTER;UNIVERSITY OF PITTSBURGH;BALTIMORE	NOTREPORTED;BALTIMORE VET. AFF. MEDICAL CENTER;NOTREPORTED		RYAN AS, 2001, DIABETES CARE	RYAN AS, 2001, DIABETES CARE
SAARINEN L;PULKKINEN A;KAREINEN A;HEIKKINEN S;LEHTO S;LAAKSO M	none	OBJECTIVE - TO INVESTIGATE THE ASSOCIATION OF VARIANTS OF THE FATTY ACID-BINDING PROTEIN (FABP) 2 GENE WITH CORONARY HEART DISEASE (CHD) IN NONDIABETIC SUBJECTS AND IN PATIENTS WITH NIDDM. RESEARCH DESIGN AND METHODS - CROSS-SECTIONAL STUDY INCLUDED 135 NONDIABETIC AND 79 NIDDM SUBJECTS WITH STENOSIS (>50%) IN AT LEAST TWO CORONARY ARTERIES. A GROUP OF 81 HEALTHY NONDIABETIC MEN WITHOUT CHD SERVE…	DEPARTMENT OF MEDICINE, UNIVERSITY OF KUOPIO, KUOPIO, FINLAND; DEPARTMENT OF MEDICINE, UNIVERSITY OF KUOPIO, 70210 KUOPIO, FINLAND		10.2337/diacare.21.5.849	ARTICLE	ALLELES; AMINO ACID SUBSTITUTION; BLOOD GLUCOSE; BLOOD PRESSURE; BODY MASS INDEX; CARRIER PROTEINS; CODON; CORONARY DISEASE; CROSS-SECTIONAL STUDIES; DATA INTERPRETATION; STATISTICAL; DIABETES MELLITUS; TYPE 2; DIASTOLE; FASTING; FATTY ACID-BINDING PROTEINS; FATTY ACIDS; FEMALE; GENE FREQUENCY; HUMANS; INSULIN; MALE; MIDDLE AGED; MYELIN P2 PROTEIN; NEOPLASM PROTEINS; POINT MUTATION; POLYMORPHISM;…	DIABETES CARE	DIABETES CARE	ENGLISH		1998	M. LAAKSO; DEPARTMENT OF MEDICINE, UNIVERSITY OF KUOPIO, 70210 KUOPIO, FINLAND; EMAIL: MARKKU.LAAKSO@UKU.FI	01495992	DIABETES CARE	16	VARIANTS OF THE FATTY ACIDBINDING PROTEIN 2 GENE ARE NOT ASSOCIATED WITH CORONARY HEART DISEASE IN NONDIABETIC SUBJECTS AND IN WITH NIDDM	21	ISI	UNIVERSITY OF KUOPIO;UNIVERSITY OF KUOPIO	NOTREPORTED;UNIVERSITY OF KUOPIO;NOTREPORTED		SAARINEN L, 1998, DIABETES CARE	SAARINEN L, 1998, DIABETES CARE
SABERI F;SATTARI R;SOTEH M;BAGHERI B;MAHROOZ A;MOKHTARI H;ZARGARI M	ACHARI AE, 2017, INT J MOL SCI, V18, DOI 10.3390/IJMS18061321;AL-DAGHRI NM, 2011, MOL BIOL REP, V38, P3703, DOI 10.1007/S11033-010-0484-5;ASADI A, 2020, IRAN J ALLERGY ASTHM, V19, P84, DOI 10.18502/IJAAI.V19I1.2421;BAGHERI B, 2016, J CLIN DIAGN RES, V10, POC27, DOI 10.7860/JCDR/2016/16335.7281;BEANEY KE, 2017, CLIN CHEM LAB MED, V55, P1605, DOI 10.1515/CCLM-2016-0984;BENZIE IFF, 1996, ANAL BIOCHE…	BACKGROUND: SEVERAL GENOME-WIDE-ASSOCIATION-STUDIES HAVE APPROVED A SERIES OF ADIPONECTIN POLYMORPHISMS FIRMLY ASSOCIATED WITH CORONARY ARTERY DISEASE (CAD), TYPE 2 DIABETES MELLITUS AND RELATED METABOLIC TRAITS. IN THIS STUDY, THE RELATIONSHIP BETWEEN +45 T/G (RS2241766) AND THE +276 G/T(RS1501299) ADIPONECTIN POLYMORPHISMS WAS INVESTIGATED WITH CORONARY HEART DISEASE, ANTIOXIDANT CAPACITY, AND …	MAZANDARAN UNIV MED SCI, FAC MED, MOL & CELL BIOL RES CTR, DEPT CLIN BIOCHEM & GENETA, SARI, IRAN.; MAZANDARAN UNIV MED SCI, FAC MED, CARDIOVASC RES CTR, DEPT CARDIOL, SARI, IRAN.; MAZANDARAN UNIV MED SCI, FAC MED, IMMUNUNOGENET RES CTR, SARI, IRAN.;	ADIPONECTIN POLYMORPHISM; CORONARY ARTERY DISEASE; TYPE 2 DIABETES MELLITUS; ANTIOXIDANT CAPACITY; GLYCEMIC INDEX	10.1016/j.humgen.2022.201118	ARTICLE	OXIDATIVE STRESS; CARDIOVASCULAR-DISEASES; RISK-FACTORS; ASSOCIATION; BURDEN; MORTALITY; INSIGHTS; OBESITY	HUM GENE	HUM. GENE	ENGLISH	ELSEVIER	2022	ZARGARI, M (CORRESPONDING AUTHOR), MAZANDARAN UNIV MED SCI, FAC MED, MOL & CELL BIOL RES CTR, DEPT CLIN BIOCHEM & GENETA, SARI, IRAN.	2773-0441	HUMAN GENE	0	THE EVALUATION OF ADIPONECTIN GENE POLYMORPHISMS RS2241766 AND RS1501299 IN SUSCEPTIBILITY TO SEVERE CORONARY ARTERY DISEASE IN A NORTH IRANIAN POPULATION	34	ISI	MAZANDARAN UNIVERSITY MEDICAL SCIENCES; MAZANDARAN UNIVERSITY MEDICAL SCIENCES; MAZANDARAN UNIVERSITY MEDICAL SCIENCES	MAZANDARAN UNIV MED SCI		SABERI F, 2022, HUM GENE	SABERI F, 2022, HUM GENE
SANTANIEMI M;UKKOLA O;KESÄNIEMI Y	BYON JCH, 1998, MOL CELL BIOCHEM, V182, P101, DOI 10.1023/A:1006868409841;CHAGNON YC, 1999, INT J OBESITY, V23, P278, DOI 10.1038/SJ.IJO.0800809;CHENG A, 2002, DEV CELL, V2, P497, DOI 10.1016/S1534-5807(02)00149-1;CHUNG WK, 1997, DIABETES, V46, P1509, DOI 10.2337/DIAB.46.9.1509;CONSIDINE RV, 1996, DIABETES, V45, P992, DOI 10.2337/DIABETES.45.7.992;DI PAOLA R, 2002, AM J HUM GENET, V70, P806, DOI …	OBJECTIVES. THE ASSOCIATION BETWEEN THREE TYROSINE PHOSPHATASE 1B (PTP1B) GENE POLYMORPHISMS AND TYPE 2 DIABETES WAS EXAMINED BY COMPARING THE PREVALENCE RATES OF THESE POLYMORPHISMS IN TYPE 2 DIABETIC PATIENTS AND HEALTHY CONTROL SUBJECTS. FURTHERMORE, THE ASSOCIATION OF THE POLYMORPHISMS AND PTP1B AND LEPTIN RECEPTOR (LEPR) GENE-GENE INTERACTIONS WITH COMPLICATIONS OF TYPE 2 DIABETES WERE EXAMI…	UNIV OULU, DEPT INTERNAL MED, FIN-90014 OULU, FINLAND.; UNIV OULU, BIOCTR, OULU, FINLAND.;	GENE-GENE INTERACTION; LEPTIN RECEPTOR; TYROSINE PHOSPHATASE 1B; SINGLE NUCLEOTIDE POLYMORPHISM; TYPE 2 DIABETES	10.1111/j.1365-2796.2004.01339.x	ARTICLE	SINGLE NUCLEOTIDE POLYMORPHISM; SIGNAL-TRANSDUCTION; INSULIN SENSITIVITY; BODY-COMPOSITION; QUEBEC FAMILY; OBESITY; RESISTANCE; MELLITUS; MICE; LEPR	J INTERN MED	J. INTERN. MED.	ENGLISH	WILEY	2004	UKKOLA, O (CORRESPONDING AUTHOR), UNIV OULU, DEPT INTERNAL MED, POB 5000, FIN-90014 OULU, FINLAND.	0954-6820	JOURNAL OF INTERNAL MEDICINE	30	TYROSINE PHOSPHATASE 1B AND LEPTIN RECEPTOR GENES AND THEIR INTERACTION IN TYPE 2 DIABETES	256	ISI	UNIVERSITY OF OULU; UNIVERSITY OF OULU	UNIV OULU		SANTANIEMI M, 2004, J INTERN MED	SANTANIEMI M, 2004, J INTERN MED
SASSO F;TORELLA D;CARBONARA O;ELLISON G;TORELLA M;SCARDONE M;MARRA C;NASTI R;MARFELLA R;COZZOLINO D;INDOLFI C;COTRUFO M;TORELLA R;SALVATORE T	none	OBJECTIVES: THE AIM OF THE PRESENT STUDY WAS TO EVALUATE THE EXPRESSION AND THE ACTIVITY OF VASCULAR ENDOTHELIAL GROWTH FACTOR (VEGF) IN THE HEARTS OF DIABETIC PATIENTS WITH CHRONIC CORONARY HEART DISEASE (CHD). BACKGROUND: DIABETES IS CHARACTERIZED BY A DECREASED COLLATERAL VESSEL FORMATION IN RESPONSE TO CORONARY ISCHEMIC EVENTS, ALTHOUGH THE ROLE OF VEGF IN HUMAN DIABETIC MACROANGIOPATHY HAS N…	DEPARTMENT OF GERIATRICS AND METABOLIC DISEASE, SECOND UNIVERSITY OF NAPLES, NAPLES, ITALY; DEPARTMENT OF CARDIO-THORACIC AND RESPIRATORY SCIENCES, SECOND UNIVERSITY OF NAPLES, NAPLES, ITALY; EXCELLENCE CENTRE FOR CARDIOVASCULAR DISEASE, SECOND UNIVERSITY OF NAPLES, NAPLES, ITALY; DIVISION OF CARDIOLOGY, MAGNA GRAECIA UNIVERSITY, CATANZARO, ITALY; RESEARCH INSTITUTE FOR SPORT AND EXERCISE SCIENCE…		10.1016/j.jacc.2005.06.007	ARTICLE	AGED; CASE-CONTROL STUDIES; CHRONIC DISEASE; CORONARY ARTERIOSCLEROSIS; DIABETES MELLITUS; TYPE 2; DIABETIC ANGIOPATHIES; ENDOTHELIUM; VASCULAR; HUMANS; MALE; MIDDLE AGED; MYOCARDIUM; RECEPTORS; VASCULAR ENDOTHELIAL GROWTH FACTOR; SIGNAL TRANSDUCTION; VASCULAR ENDOTHELIAL GROWTH FACTORS; ENDOTHELIAL NITRIC OXIDE SYNTHASE; MESSENGER RNA; PROTEIN KINASE B; VASCULOTROPIN; VASCULOTROPIN RECEPTOR 1; V…	J AM COLL CARDIOL	J. AM. COLL. CARDIOL.	ENGLISH		2005	F.C. SASSO; DEPARTMENT OF GERIATRICS AND METABOLIC DISEASE, INSTITUTE OF INTERNAL MEDICINE, SECOND UNIVERSITY OF NAPLES, 80122 NAPLES, VIA F. PETRARCA, 64, ITALY; EMAIL: FERDINANDO.SASSO@UNINA2.IT	07351097	JOURNAL OF THE AMERICAN COLLEGE OF CARDIOLOGY	167	INCREASED VASCULAR ENDOTHELIAL GROWTH FACTOR EXPRESSION BUT IMPAIRED VASCULAR ENDOTHELIAL GROWTH FACTOR RECEPTOR SIGNALING IN THE MYOCARDIUM OF TYPE 2 DIABETIC PATIENTS WITH CHRONIC CORONARY HEART DISEASE	46	ISI	SECOND UNIVERSITY OF NAPLES;SECOND UNIVERSITY OF NAPLES;SECOND UNIVERSITY OF NAPLES;MAGNA GRAECIA UNIVERSITY;LIVERPOOL JOHN MOORES UNIVERSITY;SECOND UNIVERSITY OF NAPLES	NOTREPORTED;SECOND UNIVERSITY OF NAPLES;NOTREPORTED		SASSO FC, 2005, J AM COLL CARDIOL	SASSO FC, 2005, J AM COLL CARDIOL
SCHMIDT A;SWERDLOW D;HOLMES M;PATEL R;FAIRHURST-HUNTER Z;LYALL D;HARTWIG F;HORTA B;HYPPÖNEN E;POWER C;MOLDOVAN M;VAN I E;HOVINGH G;DEMUTH I;NORMAN K;STEINHAGEN-THIESSEN E;DEMUTH J;BERTRAM L;LIU T;COASSIN S;WILLEIT J;KIECHL S;WILLEIT K;MASON D;WRIGHT J;MORRIS R;WANAMETHEE G;WHINCUP P;BEN-SHLOMO Y;MCLACHLAN S;PRICE J;KIVIMAKI M;WELCH C;SANCHEZ-GALVEZ A;MARQUES-VIDAL P;NICOLAIDES A;PANAYIOTOU A;ONLA…	none	BACKGROUND STATIN TREATMENT AND VARIANTS IN THE GENE ENCODING HMG-COA REDUCTASE ARE ASSOCIATED WITH REDUCTIONS IN BOTH THE CONCENTRATION OF LDL CHOLESTEROL AND THE RISK OF CORONARY HEART DISEASE, BUT ALSO WITH MODEST HYPERGLYCAEMIA, INCREASED BODYWEIGHT, AND MODESTLY INCREASED RISK OF TYPE 2 DIABETES, WHICH IN NO WAY OFFSETS THEIR SUBSTANTIAL BENEFITS. WE SOUGHT TO INVESTIGATE THE ASSOCIATIONS OF…	INSTITUTE OF CARDIOVASCULAR SCIENCE, UNIVERSITY COLLEGE LONDON, UNITED KINGDOM; DEPARTMENT OF PRIMARY CARE & POPULATION HEALTH, UNIVERSITY COLLEGE LONDON, UNITED KINGDOM; DEPARTMENT OF EPIDEMIOLOGY AND PUBLIC HEALTH, UCL INSTITUTE OF EPIDEMIOLOGY AND HEALTH CARE, UNIVERSITY COLLEGE LONDON, UNITED KINGDOM; CENTRE FOR CARDIOVASCULAR GENETICS, UNIVERSITY COLLEGE LONDON, UNITED KINGDOM; FARR INSTITUT…		10.1016/S2213-8587(16)30396-5	ARTICLE	BLOOD GLUCOSE; CASE-CONTROL STUDIES; CHOLESTEROL; LDL; COHORT STUDIES; DIABETES MELLITUS; TYPE 2; GENETIC PREDISPOSITION TO DISEASE; GENETIC VARIATION; HUMANS; MENDELIAN RANDOMIZATION ANALYSIS; PROPROTEIN CONVERTASE 9; RANDOMIZED CONTROLLED TRIALS AS TOPIC; GLUCOSE; HEMOGLOBIN A1C; INSULIN; LOW DENSITY LIPOPROTEIN CHOLESTEROL; PROPROTEIN CONVERTASE 9; LOW DENSITY LIPOPROTEIN CHOLESTEROL; PCSK9 PR…	LANCET DIABETES ENDOCRINOL	LANCET DIABETES ENDOCRINOL.	ENGLISH	LANCET PUBLISHING GROUP	2017	A.F. SCHMIDT; INSTITUTE OF CARDIOVASCULAR SCIENCE, UNIVERSITY COLLEGE LONDON, LONDON, NW1 2DA, UNITED KINGDOM; EMAIL: AMAND.SCHMIDT@UCL.AC.UK	22138587	THE LANCET DIABETES AND ENDOCRINOLOGY	274	PCSK9 GENETIC VARIANTS AND RISK OF TYPE 2 DIABETES A MENDELIAN RANDOMISATION STUDY	5	ISI	UNIVERSITY COLLEGE LONDON;UNIVERSITY COLLEGE LONDON;UNIVERSITY COLLEGE LONDON;UNIVERSITY COLLEGE LONDON;UNIVERSITY COLLEGE LONDON;IMPERIAL COLLEGE LONDON;IMPERIAL COLLEGE LONDON;IMPERIAL COLLEGE LONDON;IMPERIAL COLLEGE LONDON;IMPERIAL COLLEGE LONDON;UNIVERSITY OF OXFORD;MEDICAL RESEARCH COUNCIL POPULATION HEALTH RESEARCH UNIT AT THE UNIVERSITY OF OXFORD;UNIVERSITY OF OXFORD;THE BARTS HEART CENTRE…	A.F. SCHMIDT;UNIVERSITY COLLEGE LONDON;EMAIL: AMAND.SCHMIDT@UCL.AC.UK		SCHMIDT AF, 2017, LANCET DIABETES ENDOCRINOL	SCHMIDT AF, 2017, LANCET DIABETES ENDOCRINOL
SHAHID S;SHABANA S;HUMPHRIES S	none	BACKGROUND: RS10911021 (A SINGLE NUCLEOTIDE POLYMORPHISM PRESENT UPSTREAM OF THE GLUL GENE) AFFECTS GLUTAMIC ACID METABOLISM, AND WAS SHOWN TO BE ASSOCIATED WITH CORONARY HEART DISEASE (CHD) IN PATIENTS WITH T2DM BUT A DEFINITE MECHANISM IS UNKNOWN. IT MAY AFFECT GLUTATHIONE CYCLE, AN IMPORTANT EFFECTOR IN THE ANTIOXIDANT DEFENSE MECHANISM, IN THE CELLS. WE CHECKED THE ASSOCIATION OF THIS SNP WIT…	DEPARTMENT OF MICROBIOLOGY AND MOLECULAR GENETICS, UNIVERSITY OF THE PUNJAB, LAHORE, 54590, PAKISTAN	GSH; GSSG; MDA; OXIDATIVE STRESS	10.1186/s12944-017-0654-8	ARTICLE	AGED; ALLELES; BIOMARKERS; CASE-CONTROL STUDIES; CORONARY DISEASE; DIABETES MELLITUS; TYPE 2; FEMALE; GENE EXPRESSION; GENE FREQUENCY; GENOTYPE; GLUTAMATE-AMMONIA LIGASE; GLUTATHIONE; HUMANS; MALE; MALONDIALDEHYDE; MIDDLE AGED; OXIDATIVE STRESS; PAKISTAN; POLYMORPHISM; SINGLE NUCLEOTIDE; GLUTATHIONE; GLUTATHIONE DISULFIDE; LIPID; MALONALDEHYDE; BIOLOGICAL MARKER; GLUTAMATE AMMONIA LIGASE; GLUTATH…	LIPIDS HEALTH DIS	LIPIDS HEALTH DIS.	ENGLISH	BIOMED CENTRAL LTD.	2018	S.U. SHAHID; DEPARTMENT OF MICROBIOLOGY AND MOLECULAR GENETICS, UNIVERSITY OF THE PUNJAB, LAHORE, 54590, PAKISTAN; EMAIL: SALEEMULLAHSHAHID@HOTMAIL.COM	1476511X	LIPIDS IN HEALTH AND DISEASE	17	THE SNP RS10911021 IS ASSOCIATED WITH OXIDATIVE STRESS IN CORONARY HEART DISEASE PATIENTS FROM PAKISTAN	17	ISI	UNIVERSITY OF THE PUNJAB	NOTREPORTED;UNIVERSITY OF THE PUNJAB;NOTREPORTED		SHAHID SU, 2018, LIPIDS HEALTH DIS	SHAHID SU, 2018, LIPIDS HEALTH DIS
SHIMADA T;FURUKAWA Y;FURUTA H;YASUDA K;MATSUNO S;KUSUYAMA A;DOI A;NISHI M;SASAKI H;SANKE T;NANJO K	none	THE MET55VAL POLYMORPHISM IN THE SMALL UBIQUITIN-LIKE MODIFIER 4 (SUMO4) GENE HAS BEEN ASSOCIATED WITH SUSCEPTIBILITY NOT ONLY TO TYPE 1 DIABETES, BUT ALSO TO TYPE 2 DIABETES AND DIABETIC NEPHROPATHY. WE TRIED TO CONFIRM THE ASSOCIATION WITH SUSCEPTIBILITY TO TYPE 2 DIABETES AND TO INVESTIGATE ITS ROLE IN DIABETIC VASCULAR COMPLICATIONS. THE POLYMORPHISM WAS GENOTYPED IN TWO INDEPENDENT JAPANESE …	THE FIRST DEPARTMENT OF MEDICINE, WAKAYAMA MEDICAL UNIVERSITY, WAKAYAMA, JAPAN; DEPARTMENT OF METABOLIC DISORDER, RESEARCH INSTITUTE, INTERNATIONAL MEDICAL CENTER OF JAPAN, TOKYO, JAPAN; DEPARTMENT OF CLINICAL LABORATORY MEDICINE, WAKAYAMA MEDICAL UNIVERSITY, WAKAYAMA, JAPAN	MACROVASCULAR COMPLICATION; POLYMORPHISM; SUMO4; TYPE 2 DIABETES	10.1016/j.diabres.2009.04.001	ARTICLE	AGED; AMINO ACID SUBSTITUTION; AUTOANTIBODIES; CORONARY DISEASE; DIABETES MELLITUS; TYPE 2; DIABETIC ANGIOPATHIES; FEMALE; GENETIC PREDISPOSITION TO DISEASE; GLUTAMATE DECARBOXYLASE; HEMOGLOBIN A; GLYCOSYLATED; HUMANS; HYPOGLYCEMIC AGENTS; INSULIN; JAPAN; MALE; METHIONINE; MIDDLE AGED; REFERENCE VALUES; SMALL UBIQUITIN-RELATED MODIFIER PROTEINS; VALINE; METHIONINE; SUMO 4 PROTEIN; SUMO PROTEIN; U…	DIABETES RES CLIN PRACT	DIABETES RES. CLIN. PRACT.	ENGLISH		2009	H. FURUTA; THE FIRST DEPARTMENT OF MEDICINE, WAKAYAMA MEDICAL UNIVERSITY, WAKAYAMA, JAPAN; EMAIL: HFURUTA@WAKAYAMA-MED.AC.JP	01688227	DIABETES RESEARCH AND CLINICAL PRACTICE	9	SUMO4 MET55VAL POLYMORPHISM IS ASSOCIATED WITH CORONARY HEART DISEASE IN JAPANESE TYPE 2 DIABETES INDIVIDUALS	85	ISI	WAKAYAMA MEDICAL UNIVERSITY;RESEARCH INSTITUTE;WAKAYAMA MEDICAL UNIVERSITY	NOTREPORTED;WAKAYAMA MEDICAL UNIVERSITY;NOTREPORTED		SHIMADA T, 2009, DIABETES RES CLIN PRACT	SHIMADA T, 2009, DIABETES RES CLIN PRACT
SO W;WANG Y;NG M;YANG X;MA R;LAM V;KONG A;TONG P;CHAN J	none	OBJECTIVE - WE REPORT THE INDEPENDENT RISK ASSOCIATION OF TYPE 2 DIABETIC NEPHROPATHY WITH THE Z -2 ALLELE OF THE 5'-(CA)N MICROSATELLITE AND C-106T PROMOTER POLYMORPHISMS OF THE ALDOSE REDUCTASE GENE (ALR2) USING A CASE-CONTROL DESIGN. IN THIS EXPANDED COHORT, WE EXAMINED THEIR PREDICTIVE ROLES ON NEW ONSET OF CARDIORENAL COMPLICATIONS USING A PROSPECTIVE DESIGN. RESEARCH DESIGN AND METHODS - IN…	DEPARTMENT OF MEDICINE AND THERAPEUTICS, CHINESE UNIVERSITY OF HONG KONG, PRINCE OF WALES HOSPITAL, SHATIN, HONG KONG; LI KA SHING INSTITUTE OF HEALTH SCIENCES, CHINESE UNIVERSITY OF HONG KONG, PRINCE OF WALES HOSPITAL, SHATIN, HONG KONG; HONG KONG INSTITUTE OF DIABETES AND OBESITY, CHINESE UNIVERSITY OF HONG KONG, PRINCE OF WALES HOSPITAL, SHATIN, HONG KONG		10.2337/dc08-0712	ARTICLE	AGED; ALDEHYDE REDUCTASE; ALLELES; ASIAN CONTINENTAL ANCESTRY GROUP; CORONARY DISEASE; DIABETES MELLITUS; TYPE 2; DIABETIC NEPHROPATHIES; FEMALE; GENE FREQUENCY; GENETIC PREDISPOSITION TO DISEASE; GENOTYPE; HONG KONG; HUMANS; INCIDENCE; MALE; MIDDLE AGED; POLYMORPHISM; GENETIC; PROSPECTIVE STUDIES; ALDEHYDE REDUCTASE; ANGIOTENSIN RECEPTOR ANTAGONIST; ANTILIPEMIC AGENT; DIPEPTIDYL CARBOXYPEPTIDASE…	DIABETES CARE	DIABETES CARE	ENGLISH		2008	J. C. N. CHAN; DEPARTMENT OF MEDICINE AND THERAPEUTICS, CHINESE UNIVERSITY OF HONG KONG, PRINCE OF WALES HOSPITAL, SHATIN, HONG KONG; EMAIL: JCHAN@CUHK.EDU.HK	19355548	DIABETES CARE	29	ALDOSE REDUCTASE GENOTYPES AND CARDIORENAL COMPLICATIONS AN 8YEAR PROSPECTIVE ANALYSIS OF 1074 TYPE 2 DIABETIC PATIENTS	31	ISI	CHINESE UNIVERSITY OF HONG KONG;CHINESE UNIVERSITY OF HONG KONG;CHINESE UNIVERSITY OF HONG KONG	NOTREPORTED;CHINESE UNIVERSITY OF HONG KONG;NOTREPORTED		SO WY, 2008, DIABETES CARE	SO WY, 2008, DIABETES CARE
SUEHIRO T;NAKAUCHI Y;YAMAMOTO M;ARII K;ITOH H;HAMASHIGE N;HASHIMOTO K	none	WE INVESTIGATED THE ASSOCIATION OF PARAOXONASE (PON) GENE POLYMORPHISM WITH BOTH THE OCCURRENCE OF CORONARY HEART DISEASE (CHD) AND THE SEVERITY OF CORONARY ARTERY STENOSIS IN JAPANESE SUBJECTS. PON IS A PROTEIN ASSOCIATED WITH PLASMA HDL. IT HAS BEEN HYPOTHESIZED AN A/B (GIN 192→ARG) POLYMORPHISM OF PON MAY BE INVOLVED IN THE PATHOGENESIS OF CHD, ESPECIALLY AMONG SUBJECTS WITH NON-INSULIN-DEPEND…	SECOND DEPT. OF INTERNAL MEDICINE, KOCHI MEDICAL SCHOOL, KOCHI 783, KOHASU, OKOH-CHO, NANKOKU, JAPAN; DEPT. OF CARDIOVASCULAR DISEASE, CHIKAMORI HOSPITAL, KOCHI, KOCHI 780, OHKAWASUJI, JAPAN	CORONARY ANGIOGRAPHY; LDL; MYOCARDIAL INFARCTION; OXIDATION	10.1016/S0167-5273(96)02779-9	ARTICLE	AGED; ARYLDIALKYLPHOSPHATASE; CASE-CONTROL STUDIES; CONSTRICTION; PATHOLOGIC; CORONARY ANGIOGRAPHY; CORONARY DISEASE; ESTERASES; FEMALE; GENOTYPE; HUMANS; JAPAN; MALE; MIDDLE AGED; POLYMORPHISM; GENETIC; ARYLESTERASE; LOW DENSITY LIPOPROTEIN; ANGIOCARDIOGRAPHY; ARTICLE; CONTROLLED STUDY; CORONARY ARTERY DISEASE; CORONARY ARTERY OBSTRUCTION; GENETIC POLYMORPHISM; HUMAN; JAPAN; MAJOR CLINICAL STUDY…	INT J CARDIOL	INT. J. CARDIOL.	ENGLISH		1996		01675273	INTERNATIONAL JOURNAL OF CARDIOLOGY	121	PARAOXONASE GENE POLYMORPHISM IN JAPANESE SUBJECTS WITH CORONARY HEART DISEASE	57	ISI	KOCHI MEDICAL SCHOOL;CHIKAMORI HOSPITAL	KOCHI MEDICAL SCHOOL;CHIKAMORI HOSPITAL		SUEHIRO T, 1996, INT J CARDIOL	SUEHIRO T, 1996, INT J CARDIOL
SUN J;XU Y;XUE J;ZHU Y;LU H	none	EPIDEMIOLOGICAL STUDIES HAVE IDENTIFIED HYPERHOMOCYST(E)INEMIA AS AN INDEPENDENT RISK FACTOR FOR ATHEROSCLEROSIS. THE C677T VARIANT OF THE METHYLENETETRAHYDROFOLATE REDUCTASE (MTHFR) GENE, ONE OF THE KEY ENZYMES CATALYZING REMETHYLATION OF HOMOCYSTEINE, MIGHT PLAY A ROLE IN THE DEVELOPMENT OF CORONARY HEART DISEASE (CHD). IN THIS STUDY, WE EXAMINED THE DISTRIBUTION OF THE MTHFR GENOTYPES IN THE C…	DEPARTMENT OF ENDOCRINOLOGY, ZHONGNAN HOSPITAL, WUHAN UNIV., WUHAN 430071, CHINA, CHINA	CORONARY HEART DISEASE; GENETICS; METHYLENETETRAHYDROFOLATE REDUCTASE; TYPE 2 DIABETES MELLITUS	10.1016/j.mce.2004.09.003	ARTICLE	ASIAN CONTINENTAL ANCESTRY GROUP; CASE-CONTROL STUDIES; CORONARY DISEASE; DIABETES MELLITUS; TYPE 2; FEMALE; GENETIC PREDISPOSITION TO DISEASE; GENOTYPE; HOMOCYSTEINE; HUMANS; MALE; METHYLENETETRAHYDROFOLATE REDUCTASE (NADPH2); MIDDLE AGED; POLYMORPHISM; GENETIC; PREDICTIVE VALUE OF TESTS; RISK FACTORS; 5;10 METHYLENETETRAHYDROFOLATE REDUCTASE (FADH2); HOMOCYSTEINE; ADULT; ALLELE; ARTICLE; CHINES…	MOL CELL ENDOCRINOL	MOL. CELL. ENDOCRINOL.	ENGLISH		2005	DEPARTMENT OF ENDOCRINOLOGY, ZHONGNAN HOSPITAL, WUHAN UNIV., WUHAN 430071, CHINA, CHINA; EMAIL: SJZ300@163.COM	03037207	MOLECULAR AND CELLULAR ENDOCRINOLOGY	33	METHYLENETETRAHYDROFOLATE REDUCTASE POLYMORPHISM ASSOCIATED WITH SUSCEPTIBILITY TO CORONARY HEART DISEASE IN CHINESE TYPE 2 DIABETIC PATIENTS	229	ISI	WUHAN UNIV.	WUHAN UNIV.;NOTREPORTED		SUN J, 2005, MOL CELL ENDOCRINOL	SUN J, 2005, MOL CELL ENDOCRINOL
SUN J;XU Y;ZHU Y;LU H	none	OBJECTIVE: TO INVESTIGATE THE DISTRIBUTION OF METHYLENETETRAHYDROFOLATE REDUCTASE (MTHFR) GENOTYPES IN CHINESE POPULATION AND THE ASSOCIATION BETWEEN THE C677T VARIANT OF MTHFR GENE AND CORONARY HEART DISEASE (CHD) IN CHINESE TYPE 2 DIABETIC PATIENTS. METHODS: A TOTAL OF 228 UNRELATED PATIENTS WITH TYPE 2 DIABETES MELLITUS (126 WITH CORONARY HEART DISEASE) AND 114 HEALTHY CONTROL SUBJECTS WERE IN…	DEPT. OF ENDOCRINOLOGY, ZHONGNAN HOSPITAL OF WUHAN UNIVERSITY, WUHAN 430071, CHINA	CORONARY HEART DISEASE; GENETIC POLYMORPHISM; METHYLENETETRAHYDROFOLATE REDUCTASE; TYPE 2 DIABETES MELLITUS		ARTICLE		MED J WUHAN UNIV	MED. J. WUHAN UNIV.	ENGLISH	EDITORIAL BOARD OF MEDICAL JOURNAL OF WUHAN UNIVERSITY	2010		16718852	MEDICAL JOURNAL OF WUHAN UNIVERSITY	1	METHYLENETETRAHYDROFOLATE REDUCTASE POLYMORPHISM ASSOCIATES WITH SUSCEPTIBILITY TO CORONARY HEART DISEASE IN CHINESE TYPE 2 DIABETIC PATIENTS	31	ISI	ZHONGNAN HOSPITAL OF WUHAN UNIVERSITY	ZHONGNAN HOSPITAL OF WUHAN UNIVERSITY		SUN J, 2010, MED J WUHAN UNIV	SUN J, 2010, MED J WUHAN UNIV
SWAGELL C;HENLY D;MORRIS C	AALTOSETALA K, 1996, J LIPID RES, V37, P1802;ANONYMOUS, NO TITLE CAPTURED;BRASAEMLE DL, 1997, J LIPID RES, V38, P2249;BREN ND, 1993, MAYO CLIN PROC, V68, P657, DOI 10.1016/S0025-6196(12)60601-6;BUSCH AK, 2002, DIABETES, V51, P977, DOI 10.2337/DIABETES.51.4.977;CARAGLIA M, 2000, EUR J BIOCHEM, V267, P3919, DOI 10.1046/J.1432-1327.2000.01465.X;CARLSSON C, 1999, ENDOCRINOLOGY, V140, P3422, DOI 10.12…	SATURATED FAT PLAYS A ROLE IN COMMON DEBILITATING DISEASES SUCH AS OBESITY, TYPE 2 DIABETES, AND CORONARY HEART DISEASE. IT IS ALSO CLEAR THAT CERTAIN FATTY ACIDS ACT AS REGULATORS OF METABOLISM VIA BOTH DIRECT AND INDIRECT SIGNALLING OF TARGET TISSUES. AS THE MOLECULAR MECHANISMS OF SATURATED FATTY ACID SIGNALLING IN THE LIVER ARE POORLY DEFINED, HEPATIC GENE EXPRESSION ANALYSIS WAS UNDERTAKEN I…	QUEENSLAND UNIV TECHNOL, COOPERAT RES CTR DIAGNOST, BRISBANE, QLD 4001, AUSTRALIA.; UNIV QUEENSLAND, SCH MOL & MICROBIAL SCI, ST LUCIA, QLD 4067, AUSTRALIA.; BOND UNIV, SCH HLTH SCI, GOLD COAST, QLD 4229, AUSTRALIA.;	CDNA MICROARRAY ANALYSIS; GENE EXPRESSION; SATURATED FATTY ACID; PALMITATE; HEPATOCYTES	10.1016/j.bbrc.2004.12.188	ARTICLE	CORONARY-HEART-DISEASE; HIGH-FAT DIET; CHOLESTEROL EFFLUX; OXIDATIVE STRESS; GENE-EXPRESSION; GROWTH-FACTOR; BINDING; PROTEIN; LIVER; ACIDS	BIOCHEM BIOPH RES CO	BIOCHEM. BIOPHYS. RES. COMMUN.	ENGLISH	ACADEMIC PRESS INC ELSEVIER SCIENCE	2005	MORRIS, CP (CORRESPONDING AUTHOR), QUEENSLAND UNIV TECHNOL, COOPERAT RES CTR DIAGNOST, GPO BOX 2434, BRISBANE, QLD 4001, AUSTRALIA.	0006-291X	BIOCHEMICAL AND BIOPHYSICAL RESEARCH COMMUNICATIONS	25	EXPRESSION ANALYSIS OF A HUMAN HEPATIC CELL LINE IN RESPONSE TO PALMITATE	328	ISI	QUEENSLAND UNIVERSITY OF TECHNOLOGY (QUT); UNIVERSITY OF QUEENSLAND; BOND UNIVERSITY	QUEENSLAND UNIV TECHNOL		SWAGELL CD, 2005, BIOCHEM BIOPH RES CO	SWAGELL CD, 2005, BIOCHEM BIOPH RES CO
TABATABAEI-MALAZY O;FAKHRZADEH H;QORBANI M;AMIRI P;LARIJANI B;TAVAKKOLY-BAZZAZ J;AMOLI M	none	BACKGROUND: APOLIPOPROTEIN E (APO E) PLAYS A MAJOR ROLE IN LIPID METABOLISM, OBESITY AND ACCORDINGLY IN DEVELOPMENT OF DIABETES AND CORONARY HEART DISEASE (CHD). OUR MAIN OBJECTIVE WAS TO EVALUATE THE ASSOCIATION BETWEEN APO E GENE POLYMORPHISM WITH ANTHROPOMETRIC MEASURES.METHODS: PARTICIPANTS WERE SELECTED FROM ZONE 17 TEHRAN/IRAN. WE ASSESSED HEIGHT, WEIGHT, BODY MASS INDEX (BMI), WAIST CIRCUM…	ENDOCRINOLOGY AND METABOLISM RESEARCH CENTER, TEHRAN UNIVERSITY OF MEDICAL SCIENCES, TEHRAN, IRAN; DEPARTMENT OF EPIDEMIOLOGY AND BIOSTATISTICS, SCHOOL OF PUBLIC HEALTH, TEHRAN UNIVERSITY OF MEDICAL SCIENCES, TEHRAN, IRAN; DEPARTMENT OF MEDICAL GENETICS, SCHOOL OF MEDICINE, TEHRAN UNIVERSITY OF MEDICAL SCIENCES, TEHRAN, IRAN	APOLIPOPROTEIN E; DIABETES MELLITUS; GENDER; LIPID; OBESITY	10.1186/2251-6581-11-18	ARTICLE	APOLIPOPROTEIN E; APOLIPOPROTEIN E2; APOLIPOPROTEIN E3; APOLIPOPROTEIN E4; CHOLESTEROL; GLUCOSE; TRIACYLGLYCEROL; ABDOMINAL OBESITY; ADULT; AGE; AGED; ALLELE; ANTHROPOMETRY; APO E GENE; ARTICLE; BODY HEIGHT; BODY MASS; BODY WEIGHT; CHOLESTEROL BLOOD LEVEL; CONTROLLED STUDY; DIASTOLIC BLOOD PRESSURE; ETHNIC GROUP; FEMALE; GENE FREQUENCY; GENETIC ASSOCIATION; GENOTYPE; GLUCOSE BLOOD LEVEL; HUMAN; H…	J DIABETES METABOLIC DISORD	J. DIABETES METABOLIC DISORD.	ENGLISH		2012	M.M. AMOLI; ENDOCRINOLOGY AND METABOLISM RESEARCH CENTER, TEHRAN UNIVERSITY OF MEDICAL SCIENCES, TEHRAN, IRAN; EMAIL: AMOLIMM@TUMS.AC.IR	22516581	JOURNAL OF DIABETES AND METABOLIC DISORDERS	8	APOLIPOPROTEIN E GENE POLYMORPHISM AND ITS EFFECT ON ANTHROPOMETRIC MEASURES IN NORMOGLYCEMIC SUBJECTS AND TYPE 2 DIABETES	11	ISI	TEHRAN UNIVERSITY OF MEDICAL SCIENCES;TEHRAN UNIVERSITY OF MEDICAL SCIENCES;TEHRAN UNIVERSITY OF MEDICAL SCIENCES	NOTREPORTED;TEHRAN UNIVERSITY OF MEDICAL SCIENCES;NOTREPORTED		TABATABAEI-MALAZY O, 2012, J DIABETES METABOLIC DISORD	TABATABAEI-MALAZY O, 2012, J DIABETES METABOLIC DISORD
THOMPSON S;SANDERS J;STEPHENS J;MILLER G;HUMPHRIES S	none	THE PLEIOTROPIC PROINFLAMMATORY CYTOKINE, INTERLEUKIN 18, PLAYS A ROLE IN INNATE IMMUNITY AND, BASED ON MOUSE MODELS, INFLUENCES OBESITY. WE INVESTIGATED VARIATION WITHIN THE IL18 GENE AND ITS EFFECT ON MARKERS OF THE METABOLIC SYNDROME. A TAGGING SINGLE NUCLEOTIDE POLYMORPHISM SET OF 5 SNPS FOR THE GENE ENCODING INTERLEUKIN 18 WAS SELECTED AND GENOTYPE WAS DETERMINED IN 3 SEPARATE STUDIES. IN 27…	DEPARTMENT OF CARDIOVASCULAR GENETICS, THE RAYNE INSTITUTE, WC1E 6JF LONDON, UNITED KINGDOM; DIVISION OF SURGICAL AND INTERVENTIONAL SCIENCE, THE HEART HOSPITAL, UCLH NHS FOUNDATION TRUST, W1G 8PH LONDON, UNITED KINGDOM; THE MEDICAL SCHOOL, UNIVERSITY OF WALES SWANSEA, SA2 8PP SWANSEA, UNITED KINGDOM; DEPARTMENT OF ENVIRONMENTAL AND PREVENTIVE MEDICINE, MEDICAL RESEARCH COUNCIL CARDIOVASCULAR GRO…		10.1016/j.metabol.2006.12.015	ARTICLE	AGED; BODY MASS INDEX; CORONARY DISEASE; DIABETES MELLITUS; DNA; HAPLOTYPES; HUMANS; INTERLEUKIN-18; LINKAGE DISEQUILIBRIUM; MALE; MIDDLE AGED; POLYMERASE CHAIN REACTION; POLYMORPHISM; RESTRICTION FRAGMENT LENGTH; POLYMORPHISM; SINGLE NUCLEOTIDE; PROSPECTIVE STUDIES; INTERLEUKIN 18; ADULT; AGED; ANALYTIC METHOD; ARTICLE; BODY MASS; COMPARATIVE STUDY; CONTROLLED STUDY; CORONARY ARTERY BYPASS GRAFT…	METAB CLIN EXP	METAB. CLIN. EXP.	ENGLISH		2007	S.E. HUMPHRIES; DEPARTMENT OF CARDIOVASCULAR GENETICS, THE RAYNE INSTITUTE, WC1E 6JF LONDON, UNITED KINGDOM; EMAIL: RMHASEH@UCL.AC.UK	00260495	METABOLISM: CLINICAL AND EXPERIMENTAL	28	A COMMON INTERLEUKIN 18 HAPLOTYPE IS ASSOCIATED WITH HIGHER BODY MASS INDEX IN SUBJECTS WITH DIABETES AND CORONARY HEART DISEASE	56	ISI	THE RAYNE INSTITUTE;DIVISION OF SURGICAL AND INTERVENTIONAL SCIENCE;UNIVERSITY OF WALES SWANSEA;WOLFSON INSTITUTE OF PREVENTIVE MEDICINE	NOTREPORTED;THE RAYNE INSTITUTE;NOTREPORTED		THOMPSON SR, 2007, METAB CLIN EXP	THOMPSON SR, 2007, METAB CLIN EXP
TOKAT B;KURT O;BUGRA Z;OZTURK O;YILMAZ-AYDOGAN H	none	BACKGROUND: LFA-1/JAM-A INTERACTION PLAYS A SIGNIFICANT ROLE IN EARLY STEPS OF LEUKOCYTE TRANSENDOTHELIAL MIGRATION (DIAPEDESIS) WHICH TAKES PART IN ATHEROSCLEROSIS PATHOGENESIS. IN THIS POPULATION-BASED CASE- CONTROL STUDY, THE FREQUENCIES OF JAM-A RS790056 AND LFA-1 RS8058823 GENE POLYMORPHISMS IN PATIENTSWITH CORONARY HEART DISEASE (CHD) AND HEALTHY SUBJECTS WERE INVESTIGATED AND THE CORRELATI…	DEPARTMENT OF MOLECULAR MEDICINE, INSTITUTE FOR EXPERIMENTAL MEDICINE, ISTANBUL UNIVERSITY, ISTANBUL, TURKEY; DEPARTMENT OF BIOCHEMISTRY, FACULTY OF PHARMACY, ISTANBUL UNIVERSITY, ISTANBUL, TURKEY; DEPARTMENT OF CARDIOLOGY, ISTANBUL UNIVERSITY, ISTANBUL FACULTY OF MEDICINE, ISTANBUL, TURKEY	CORONARY HEART DISEASE; DIAPEDESIS; JAM-A; LFA-1; POLYMORPHISM	10.1016/j.mgene.2013.10.010	ARTICLE	CHOLESTEROL; HIGH DENSITY LIPOPROTEIN CHOLESTEROL; JUNCTIONAL ADHESION MOLECULE A; LOW DENSITY LIPOPROTEIN CHOLESTEROL; LYMPHOCYTE FUNCTION ASSOCIATED ANTIGEN 1; ADULT; ALCOHOL CONSUMPTION; ANGIOGRAPHY; ARTICLE; BODY MASS; CARDIOVASCULAR RISK; CASE CONTROL STUDY; CONTROLLED STUDY; DIAPEDESIS; DIASTOLIC BLOOD PRESSURE; DNA POLYMORPHISM; FEMALE; GENE; GENE FREQUENCY; GENETIC ASSOCIATION; GENETIC VA…	META GENE	META GENE	ENGLISH	ELSEVIER B.V.	2014	H. YILMAZ-AYDOGAN; ISTANBUL UNIVERSITY, THE INSTITUTE OF EXPERIMENTAL MEDICINE (DETAE), DEPARTMENT OF MOLECULAR MEDICINE, 34093 ISTANBUL, VAKIF GUREBA C., CAPA, TURKEY; EMAIL: HULYILMAZ@YAHOO.COM	22145400	META GENE	6	INVESTIGATION OF THE MONOCYTE DIAPEDESISRELATED LFA1 AND JAMA GENE VARIANTS IN TURKISH CORONARY HEART DISEASE PATIENTS	2	ISI	ISTANBUL UNIVERSITY;ISTANBUL UNIVERSITY;ISTANBUL UNIVERSITY	NOTREPORTED;ISTANBUL UNIVERSITY;NOTREPORTED		TOKAT B, 2014, META GENE	TOKAT B, 2014, META GENE
TOKORO F;MATSUOKA R;ABE S;ARAI M;NODA T;WATANABE S;HORIBE H;FUJIMAKI T;OGURI M;KATO K;MINATOGUCHI S;YAMADA Y	none	VARIOUS LOCI AND GENES THAT CONFER SUSCEPTIBILITY TO CORONARY HEART DISEASE (CHD) HAVE BEEN IDENTIFIED IN CAUCASIAN POPULATIONS BY GENOME-WIDE ASSOCIATION STUDIES (GWASS). AS TYPE 2 DIABETES MELLITUS (DM) IS AN IMPORTANT RISK FACTOR FOR CHD, WE HYPOTHESIZED THAT CERTAIN POLYMORPHISMS MAY CONTRIBUTE TO THE GENETIC SUSCEPTIBILITY TO CHD THROUGH AFFECTING THE SUSCEPTIBILITY TO TYPE 2 DM. THE PURPOSE…	DEPARTMENT OF CARDIOLOGY, GIFU PREFECTURAL GENERAL MEDICAL CENTER, GIFU, 500-8717, JAPAN; DEPARTMENT OF CARDIOVASCULAR MEDICINE, GIFU PREFECTURAL TAJIMI HOSPITAL, TAJIMI, 507-8522, GIFU, JAPAN; DEPARTMENT OF CARDIOVASCULAR MEDICINE, INABE GENERAL HOSPITAL, INABE, 511-0428, MIE, JAPAN; DEPARTMENT OF CARDIOLOGY, JAPANESE RED CROSS NAGOYA FIRST HOSPITAL, NAGOYA, 453-8511, AICHI, JAPAN; DEPARTMENT OF…	DIABETES MELLITUS; GENETICS; POLYMORPHISM; ZPR1 ZINC FINGER GENE	10.3892/br.2014.379	ARTICLE	HEMOGLOBIN A1C; UNCLASSIFIED DRUG; ZINC FINGER PROTEIN; ZINC FINGER PROTEIN 1; ADULT; AGED; ARTICLE; CONTROLLED STUDY; FEMALE; GENE FREQUENCY; GENE LOCUS; GENETIC ASSOCIATION; GENETIC SUSCEPTIBILITY; GENETIC VARIABILITY; HUMAN; MAJOR CLINICAL STUDY; MALE; MIDDLE AGED; NON INSULIN DEPENDENT DIABETES MELLITUS; PREVALENCE; SINGLE NUCLEOTIDE POLYMORPHISM	BIOMED REP	BIOMED. REP.	ENGLISH	SPANDIDOS PUBLICATIONS	2015		20499434	BIOMEDICAL REPORTS	12	ASSOCIATION OF A GENETIC VARIANT OF THE ZPR1 ZINC FINGER GENE WITH TYPE 2 DIABETES MELLITUS	3	ISI	GIFU PREFECTURAL GENERAL MEDICAL CENTER;GIFU PREFECTURAL TAJIMI HOSPITAL;INABE GENERAL HOSPITAL;JAPANESE RED CROSS NAGOYA FIRST HOSPITAL;MEITOH HOSPITAL;GIFU UNIVERSITY GRADUATE SCHOOL OF MEDICINE;MIE UNIVERSITY	GIFU PREFECTURAL GENERAL MEDICAL CENTER;GIFU PREFECTURAL TAJIMI HOSPITAL;INABE GENERAL HOSPITAL;JAPANESE RED CROSS NAGOYA FIRST HOSPITAL;MEITOH HOSPITAL;GIFU UNIVERSITY GRADUATE SCHOOL OF MEDICINE;MIE UNIVERSITY		TOKORO F, 2015, BIOMED REP	TOKORO F, 2015, BIOMED REP
TREMBATH R;THOMAS D;HENDRA T;YUDKIN J;GALTON D	none	THE PREVALENCE OF AN UNCOMMON ALLELIC VARIANT (S2) OF THE APOPROTEIN AI-CIII-AIV GENE CLUSTER WAS DETERMINED IN NON-INSULIN-DEPENDENT DIABETICS WITH OR WITHOUT EVIDENCE OF CORONARY HEART DISEASE AND IN CONTROLS. FREQUENCIES OF THE S2 ALLELE WERE 14% FOR DIABETICS WITH CORONARY HEART DISEASE COMPARED WITH 2% FOR NON-DIABETICS WITH NO CLINICAL EVIDENCE OF OCCLUSIVE VASCULAR DISEASE. NO SUBJECT WITH…	MEDICAL PROFESSORIAL UNIT, ST BARTHOLOMEW'S HOSPITAL, LONDON, EC1, UNITED KINGDOM; ACADEMIC DEPARTMENT OF DIABETES AND ENDOCRINOLOGY, WHITTINGTON HOSPITAL, LONDON, UNITED KINGDOM		10.1136/bmj.294.6587.1577	ARTICLE	ALLELES; APOLIPOPROTEINS C; AUTORADIOGRAPHY; CORONARY DISEASE; DIABETES MELLITUS; TYPE 2; DNA; FEMALE; GENE FREQUENCY; GENETIC MARKERS; HUMANS; MALE; MULTIGENE FAMILY; POLYMORPHISM; GENETIC; ADULT; BLOOD AND HEMOPOIETIC SYSTEM; CHROMOSOME; CONTROLLED STUDY; DIAGNOSIS; DNA POLYMORPHISM; GENETICS; HEART; HEREDITY; HUMAN; ISCHEMIC HEART DISEASE; LEGAL ASPECT; MAJOR CLINICAL STUDY; NON INSULIN DEPEND…	BRIT MED J	BRIT. MED. J.	ENGLISH		1987		02670623	BRITISH MEDICAL JOURNAL (CLINICAL RESEARCH ED.)	28	DEOXYRIBONUCLEIC ACID POLYMORPHISM OF THE APOPROTEIN AICIIIAIV GENE CLUSTER AND CORONARY HEART DISEASE IN NONINSULINDEPENDENT DIABETES	294	ISI	ST BARTHOLOMEW'S HOSPITAL;ACADEMIC DEPARTMENT OF DIABETES AND ENDOCRINOLOGY	ST BARTHOLOMEW'S HOSPITAL;ACADEMIC DEPARTMENT OF DIABETES AND ENDOCRINOLOGY		TREMBATH RC, 1987, BRIT MED J	TREMBATH RC, 1987, BRIT MED J
[truncated: 41 more rows]
